# Supplementary material for: Four electron selective O2 reduction by a tetranuclear vanadium(IV/V)/hydroquinonate catalyst: application in the operation of Zn–air batteries
Source: Royal Society of Chemistry journal article supplement (doi:10.1039/d1nj03626b), 2021-11-05
Supplement: d1nj03626b1.pdf [file d1nj03626b1.pdf]

## **Four electron selective O<sub>2</sub> reduction by a tetranuclear vanadium(IV/V)/hydroquinonate catalyst: Application on the operation of a Zn-air battery**

Anastasios Keramidas<sup>a,\*</sup>, Sofia Hadjithoma<sup>a</sup>, Chryssoula Drouza<sup>b</sup>, Tatiana Santos Andrade<sup>c</sup> and Panagiotis Lianos<sup>c,\*</sup>

---

<sup>a</sup> Department of Chemistry, University of Cyprus, Nicosia 1678, Cyprus.

<sup>b</sup> Department of Agricultural Sciences, Biotechnology and Food Science, Cyprus University of Technology, Limassol 3036, Cyprus.

<sup>c</sup> Department of Chemical Engineering, University of Patras, 26500 Patras, Greece.

**Figure S1.** Cyclic voltammogram of O<sub>2</sub> in aqueous solution of 0.2 M KNO<sub>3</sub> at 273 K recorded at pHs 5.8. Scan Rate 25 mV/s. Working electrode=glassy carbon. Page S3

**Figure S2.** Cyclic voltammograms of the complex **1** (2.5 mM) in A) deoxygenated and oxygenated aqueous solutions (red and black lines respectively) at pH=4.6 at scan Rate 25 mV/s. The solutions contained 0.2 M KNO<sub>3</sub> and measured at 273 K. Working electrode=glassy carbon. Page S4

**Figure S3.** A) RDE voltammetry curves of aqueous solution of **1** under Ar and O<sub>2</sub> in pH=4.9 at various rotation rates. B) Koutecky-Levich plots at 0.110 V under Ar and under O<sub>2</sub>, Scan rate: 25 mV s<sup>-1</sup>. Page S5

**Figure S4.** <sup>51</sup>V NMR spectra of an D<sub>2</sub>O solution of **1** (2.50 mM) and V<sup>IV</sup>OSO<sub>4</sub> (2.50 mM) at pD=3.0 and 4.6. Page S6

**Table S1.** RDE data of compound **1** at pH=2.5 under N<sub>2</sub>. Potentials vs Ag/AgCl.

Page S7

**Table S2.** RDE data of compound **1** at pH=2.5 under O<sub>2</sub>. Potentials vs Ag/AgCl.

Page S129

**Table S3.** RDE data of compound **1** at pH=4.9 under N<sub>2</sub>. Potentials vs Ag/AgCl.

Page S251

**Table S4.** RDE data of compound **1** at pH=4.9 under O<sub>2</sub>. Potentials vs Ag/AgCl.

Page S373

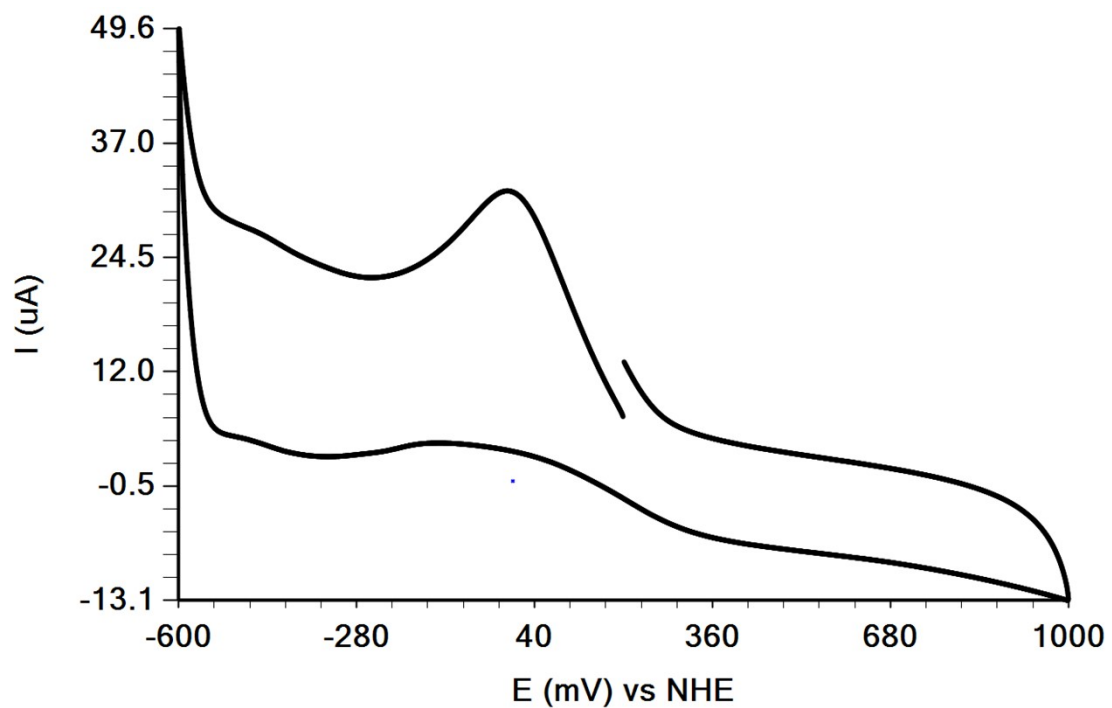

**Figure S1.** Cyclic voltammogram of O<sub>2</sub> saturated aqueous solution of 0.2 M KNO<sub>3</sub> at 273 K recorded at pHs 5.8. Scan Rate 25 mV/s. Working electrode=glassy carbon.

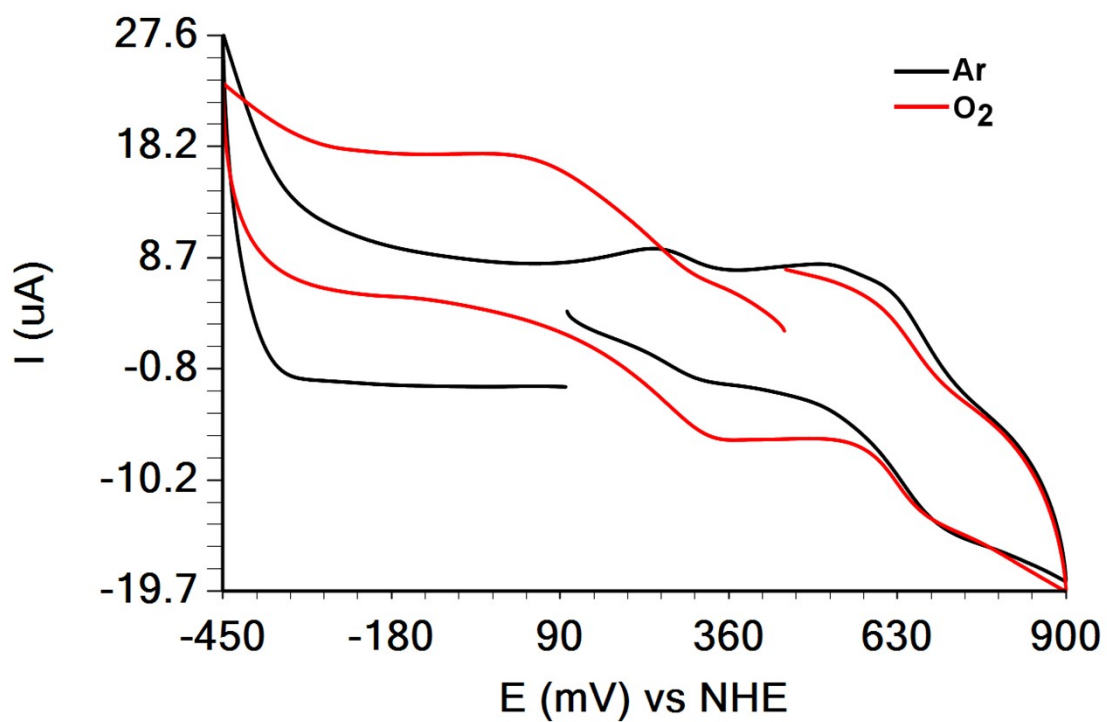

**Figure S2.** Cyclic voltammograms of the complex **1** (2.5 mM) in A) deoxygenated and oxygenated aqueous solutions (red and black lines respectively) at  $\text{pH}=4.6$  at scan Rate 25  $\text{mV/s}$ . The solutions contained 0.2 M  $\text{KNO}_3$  and measured at 273 K. Working electrode=glassy carbon.

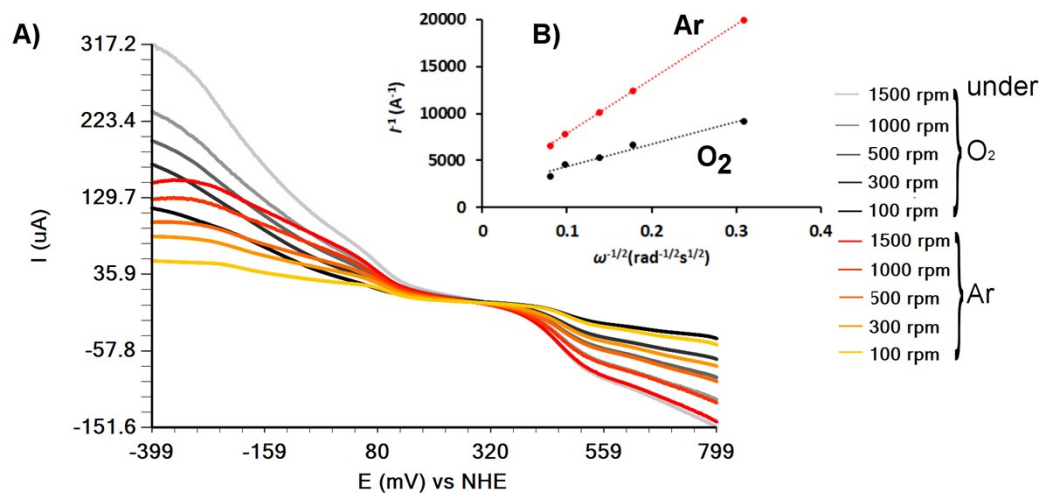

**Figure S3.** A) RDE voltammetry curves of aqueous solution of **1** under Ar and  $\text{O}_2$  in pH=4.7 at various rotation rates. B) Koutecky-Levich plots at -0.130 V under Ar and under  $\text{O}_2$ , Scan rate:  $25 \text{ mV s}^{-1}$ .

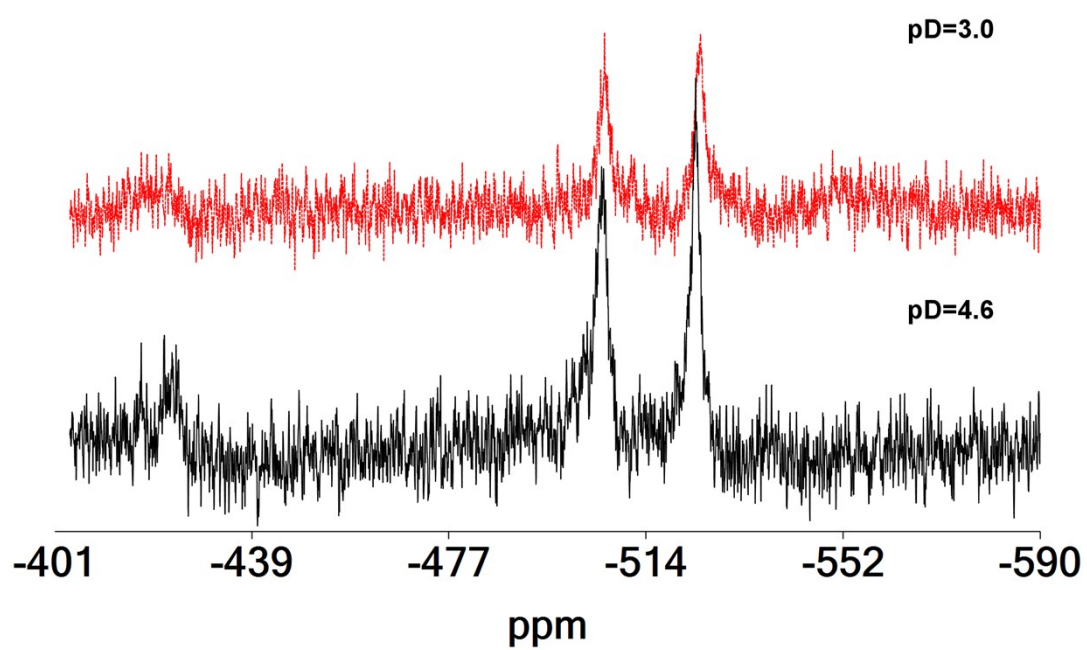

**Figure S4.**  $^{51}\text{V}$  NMR spectra of an  $\text{D}_2\text{O}$  solution of **1** (2.50 mM) and  $\text{V}^{\text{IV}}\text{OSO}_4$  (2.50 mM) at pD=3.0 and 4.6.

**Table S1.** RDE data of compound **1** at pH=2.5 under N<sub>2</sub>. Potentials vs Ag/AgCl.

Mar. 29, 2021 05:01:56

Linear Sweep Voltammetry

File: c:\users\shadji04\desktop\sofia cv\29032021\complex 6 sweep scan under nitrogen ph 2.5\100 rpm.txt

Data Source: Experiment

Instrument Model: CHI650E

Header:

Note: 100 rpm

Init E (V) = 0.8

Final E (V) = -0.4

Scan Rate (V/s) = 0.025

Sample Interval (V) = 0.001

Quiet Time (sec) = 2

Sensitivity (A/V) = 0.01

Potential/V, Current/A

0.800, -4.113e-5

0.799, -4.065e-5

0.798, -4.021e-5

0.797, -3.985e-5

0.796, -3.963e-5

0.795, -3.938e-5

0.794, -3.902e-5

0.793, -3.864e-5

0.792, -3.829e-5

0.791, -3.795e-5

0.790, -3.779e-5

0.789, -3.744e-5

0.788, -3.728e-5

0.787, -3.705e-5

0.786, -3.681e-5

0.785, -3.659e-5

0.784, -3.643e-5

0.783, -3.624e-5

0.782, -3.600e-5

0.781, -3.550e-5

0.780, -3.534e-5

0.779, -3.520e-5

0.778, -3.500e-5

0.777, -3.482e-5

0.776, -3.449e-5

0.775, -3.420e-5

0.774, -3.411e-5

0.773, -3.388e-5

0.772, -3.357e-5

0.771, -3.331e-5

0.770, -3.324e-5  
0.769, -3.302e-5  
0.768, -3.286e-5  
0.767, -3.279e-5  
0.766, -3.273e-5  
0.765, -3.248e-5  
0.764, -3.233e-5  
0.763, -3.212e-5  
0.762, -3.179e-5  
0.761, -3.170e-5  
0.760, -3.165e-5  
0.759, -3.140e-5  
0.758, -3.113e-5  
0.757, -3.091e-5  
0.756, -3.064e-5  
0.755, -3.051e-5  
0.754, -3.042e-5  
0.753, -3.033e-5  
0.752, -2.998e-5  
0.751, -2.963e-5  
0.750, -2.947e-5  
0.749, -2.946e-5  
0.748, -2.933e-5  
0.747, -2.916e-5  
0.746, -2.893e-5  
0.745, -2.887e-5  
0.744, -2.881e-5  
0.743, -2.859e-5  
0.742, -2.844e-5  
0.741, -2.835e-5  
0.740, -2.806e-5  
0.739, -2.798e-5  
0.738, -2.797e-5  
0.737, -2.781e-5  
0.736, -2.762e-5  
0.735, -2.741e-5  
0.734, -2.717e-5  
0.733, -2.693e-5  
0.732, -2.669e-5  
0.731, -2.666e-5  
0.730, -2.653e-5  
0.729, -2.648e-5  
0.728, -2.623e-5  
0.727, -2.613e-5  
0.726, -2.586e-5  
0.725, -2.581e-5  
0.724, -2.559e-5  
0.723, -2.539e-5  
0.722, -2.518e-5  
0.721, -2.511e-5



0.720, -2.496e-5  
0.719, -2.501e-5  
0.718, -2.493e-5  
0.717, -2.477e-5  
0.716, -2.462e-5  
0.715, -2.440e-5  
0.714, -2.423e-5  
0.713, -2.396e-5  
0.712, -2.400e-5  
0.711, -2.383e-5  
0.710, -2.376e-5  
0.709, -2.358e-5  
0.708, -2.346e-5  
0.707, -2.336e-5  
0.706, -2.323e-5  
0.705, -2.311e-5  
0.704, -2.293e-5  
0.703, -2.253e-5  
0.702, -2.241e-5  
0.701, -2.244e-5  
0.700, -2.243e-5  
0.699, -2.236e-5  
0.698, -2.222e-5  
0.697, -2.201e-5  
0.696, -2.196e-5  
0.695, -2.181e-5  
0.694, -2.174e-5  
0.693, -2.152e-5  
0.692, -2.134e-5  
0.691, -2.128e-5  
0.690, -2.119e-5  
0.689, -2.098e-5  
0.688, -2.067e-5  
0.687, -2.067e-5  
0.686, -2.070e-5  
0.685, -2.042e-5  
0.684, -2.034e-5  
0.683, -2.024e-5  
0.682, -2.007e-5  
0.681, -2.012e-5  
0.680, -2.009e-5  
0.679, -2.004e-5  
0.678, -1.985e-5  
0.677, -1.976e-5  
0.676, -1.968e-5  
0.675, -1.963e-5  
0.674, -1.941e-5  
0.673, -1.916e-5  
0.672, -1.902e-5  
0.671, -1.906e-5

0.670, -1.899e-5  
0.669, -1.900e-5  
0.668, -1.888e-5  
0.667, -1.856e-5  
0.666, -1.855e-5  
0.665, -1.863e-5  
0.664, -1.848e-5  
0.663, -1.836e-5  
0.662, -1.811e-5  
0.661, -1.793e-5  
0.660, -1.795e-5  
0.659, -1.814e-5  
0.658, -1.810e-5  
0.657, -1.779e-5  
0.656, -1.767e-5  
0.655, -1.748e-5  
0.654, -1.742e-5  
0.653, -1.754e-5  
0.652, -1.764e-5  
0.651, -1.742e-5  
0.650, -1.728e-5  
0.649, -1.699e-5  
0.648, -1.706e-5  
0.647, -1.684e-5  
0.646, -1.689e-5  
0.645, -1.699e-5  
0.644, -1.693e-5  
0.643, -1.688e-5  
0.642, -1.687e-5  
0.641, -1.680e-5  
0.640, -1.667e-5  
0.639, -1.652e-5  
0.638, -1.656e-5  
0.637, -1.642e-5  
0.636, -1.635e-5  
0.635, -1.641e-5  
0.634, -1.627e-5  
0.633, -1.596e-5  
0.632, -1.583e-5  
0.631, -1.574e-5  
0.630, -1.563e-5  
0.629, -1.571e-5  
0.628, -1.562e-5  
0.627, -1.566e-5  
0.626, -1.558e-5  
0.625, -1.561e-5  
0.624, -1.558e-5  
0.623, -1.542e-5  
0.622, -1.524e-5  
0.621, -1.509e-5

0.620, -1.518e-5  
0.619, -1.522e-5  
0.618, -1.513e-5  
0.617, -1.505e-5  
0.616, -1.484e-5  
0.615, -1.464e-5  
0.614, -1.471e-5  
0.613, -1.451e-5  
0.612, -1.432e-5  
0.611, -1.450e-5  
0.610, -1.456e-5  
0.609, -1.439e-5  
0.608, -1.423e-5  
0.607, -1.403e-5  
0.606, -1.409e-5  
0.605, -1.403e-5  
0.604, -1.378e-5  
0.603, -1.379e-5  
0.602, -1.399e-5  
0.601, -1.387e-5  
0.600, -1.382e-5  
0.599, -1.372e-5  
0.598, -1.365e-5  
0.597, -1.336e-5  
0.596, -1.332e-5  
0.595, -1.345e-5  
0.594, -1.323e-5  
0.593, -1.319e-5  
0.592, -1.303e-5  
0.591, -1.299e-5  
0.590, -1.288e-5  
0.589, -1.297e-5  
0.588, -1.285e-5  
0.587, -1.265e-5  
0.586, -1.252e-5  
0.585, -1.271e-5  
0.584, -1.255e-5  
0.583, -1.245e-5  
0.582, -1.235e-5  
0.581, -1.223e-5  
0.580, -1.234e-5  
0.579, -1.233e-5  
0.578, -1.209e-5  
0.577, -1.194e-5  
0.576, -1.178e-5  
0.575, -1.192e-5  
0.574, -1.163e-5  
0.573, -1.175e-5  
0.572, -1.155e-5  
0.571, -1.134e-5

0.570, -1.112e-5  
0.569, -1.106e-5  
0.568, -1.117e-5  
0.567, -1.110e-5  
0.566, -1.082e-5  
0.565, -1.071e-5  
0.564, -1.070e-5  
0.563, -1.068e-5  
0.562, -1.052e-5  
0.561, -1.044e-5  
0.560, -1.015e-5  
0.559, -9.997e-6  
0.558, -9.987e-6  
0.557, -9.948e-6  
0.556, -9.928e-6  
0.555, -9.830e-6  
0.554, -9.673e-6  
0.553, -9.604e-6  
0.552, -9.417e-6  
0.551, -9.201e-6  
0.550, -8.995e-6  
0.549, -8.838e-6  
0.548, -8.936e-6  
0.547, -8.828e-6  
0.546, -8.641e-6  
0.545, -8.504e-6  
0.544, -8.219e-6  
0.543, -8.189e-6  
0.542, -8.160e-6  
0.541, -7.895e-6  
0.540, -7.865e-6  
0.539, -7.757e-6  
0.538, -7.649e-6  
0.537, -7.443e-6  
0.536, -7.128e-6  
0.535, -7.089e-6  
0.534, -7.030e-6  
0.533, -6.873e-6  
0.532, -6.657e-6  
0.531, -6.519e-6  
0.530, -6.362e-6  
0.529, -6.166e-6  
0.528, -5.949e-6  
0.527, -5.684e-6  
0.526, -5.586e-6  
0.525, -5.468e-6  
0.524, -5.340e-6  
0.523, -5.301e-6  
0.522, -4.947e-6  
0.521, -4.839e-6

0.520, -4.790e-6  
0.519, -4.584e-6  
0.518, -4.309e-6  
0.517, -3.818e-6  
0.516, -3.847e-6  
0.515, -3.778e-6  
0.514, -3.582e-6  
0.513, -3.395e-6  
0.512, -3.100e-6  
0.511, -2.865e-6  
0.510, -2.766e-6  
0.509, -2.609e-6  
0.508, -2.472e-6  
0.507, -2.315e-6  
0.506, -2.039e-6  
0.505, -1.941e-6  
0.504, -1.656e-6  
0.503, -1.421e-6  
0.502, -1.155e-6  
0.501, -9.883e-7  
0.500, -5.462e-7  
0.499, -5.266e-7  
0.498, -4.087e-7  
0.497, -1.434e-7  
0.496, 2.495e-7  
0.495, 5.050e-7  
0.494, 4.657e-7  
0.493, 7.702e-7  
0.492, 9.569e-7  
0.491, 1.144e-6  
0.490, 1.625e-6  
0.489, 1.772e-6  
0.488, 1.890e-6  
0.487, 2.047e-6  
0.486, 2.224e-6  
0.485, 2.430e-6  
0.484, 2.607e-6  
0.483, 2.892e-6  
0.482, 3.128e-6  
0.481, 3.364e-6  
0.480, 3.717e-6  
0.479, 4.209e-6  
0.478, 4.277e-6  
0.477, 4.474e-6  
0.476, 4.602e-6  
0.475, 4.837e-6  
0.474, 5.093e-6  
0.473, 5.387e-6  
0.472, 5.545e-6  
0.471, 5.741e-6

0.470, 5.928e-6  
0.469, 6.262e-6  
0.468, 6.468e-6  
0.467, 6.743e-6  
0.466, 7.008e-6  
0.465, 7.303e-6  
0.464, 7.421e-6  
0.463, 7.873e-6  
0.462, 8.119e-6  
0.461, 8.227e-6  
0.460, 8.649e-6  
0.459, 8.855e-6  
0.458, 9.170e-6  
0.457, 9.170e-6  
0.456, 9.170e-6  
0.455, 9.612e-6  
0.454, 9.828e-6  
0.453, 9.769e-6  
0.452, 9.828e-6  
0.451, 1.005e-5  
0.450, 1.034e-5  
0.449, 1.057e-5  
0.448, 1.082e-5  
0.447, 1.098e-5  
0.446, 1.123e-5  
0.445, 1.138e-5  
0.444, 1.148e-5  
0.443, 1.143e-5  
0.442, 1.173e-5  
0.441, 1.179e-5  
0.440, 1.182e-5  
0.439, 1.197e-5  
0.438, 1.207e-5  
0.437, 1.224e-5  
0.436, 1.246e-5  
0.435, 1.249e-5  
0.434, 1.261e-5  
0.433, 1.276e-5  
0.432, 1.286e-5  
0.431, 1.292e-5  
0.430, 1.314e-5  
0.429, 1.321e-5  
0.428, 1.332e-5  
0.427, 1.341e-5  
0.426, 1.357e-5  
0.425, 1.382e-5  
0.424, 1.391e-5  
0.423, 1.408e-5  
0.422, 1.419e-5  
0.421, 1.436e-5

0.420, 1.423e-5  
0.419, 1.431e-5  
0.418, 1.464e-5  
0.417, 1.463e-5  
0.416, 1.482e-5  
0.415, 1.492e-5  
0.414, 1.513e-5  
0.413, 1.513e-5  
0.412, 1.506e-5  
0.411, 1.513e-5  
0.410, 1.540e-5  
0.409, 1.560e-5  
0.408, 1.576e-5  
0.407, 1.567e-5  
0.406, 1.577e-5  
0.405, 1.583e-5  
0.404, 1.608e-5  
0.403, 1.619e-5  
0.402, 1.615e-5  
0.401, 1.621e-5  
0.400, 1.621e-5  
0.399, 1.636e-5  
0.398, 1.654e-5  
0.397, 1.669e-5  
0.396, 1.677e-5  
0.395, 1.682e-5  
0.394, 1.699e-5  
0.393, 1.710e-5  
0.392, 1.720e-5  
0.391, 1.737e-5  
0.390, 1.754e-5  
0.389, 1.766e-5  
0.388, 1.778e-5  
0.387, 1.794e-5  
0.386, 1.796e-5  
0.385, 1.804e-5  
0.384, 1.819e-5  
0.383, 1.837e-5  
0.382, 1.857e-5  
0.381, 1.860e-5  
0.380, 1.876e-5  
0.379, 1.904e-5  
0.378, 1.932e-5  
0.377, 1.927e-5  
0.376, 1.942e-5  
0.375, 1.947e-5  
0.374, 1.963e-5  
0.373, 1.979e-5  
0.372, 1.992e-5  
0.371, 2.004e-5

0.370, 2.028e-5  
0.369, 2.038e-5  
0.368, 2.060e-5  
0.367, 2.092e-5  
0.366, 2.121e-5  
0.365, 2.118e-5  
0.364, 2.116e-5  
0.363, 2.131e-5  
0.362, 2.135e-5  
0.361, 2.163e-5  
0.360, 2.183e-5  
0.359, 2.210e-5  
0.358, 2.210e-5  
0.357, 2.221e-5  
0.356, 2.233e-5  
0.355, 2.259e-5  
0.354, 2.271e-5  
0.353, 2.292e-5  
0.352, 2.297e-5  
0.351, 2.316e-5  
0.350, 2.328e-5  
0.349, 2.341e-5  
0.348, 2.355e-5  
0.347, 2.364e-5  
0.346, 2.380e-5  
0.345, 2.397e-5  
0.344, 2.411e-5  
0.343, 2.430e-5  
0.342, 2.450e-5  
0.341, 2.451e-5  
0.340, 2.460e-5  
0.339, 2.468e-5  
0.338, 2.480e-5  
0.337, 2.499e-5  
0.336, 2.500e-5  
0.335, 2.507e-5  
0.334, 2.515e-5  
0.333, 2.529e-5  
0.332, 2.532e-5  
0.331, 2.540e-5  
0.330, 2.556e-5  
0.329, 2.561e-5  
0.328, 2.578e-5  
0.327, 2.583e-5  
0.326, 2.607e-5  
0.325, 2.612e-5  
0.324, 2.615e-5  
0.323, 2.641e-5  
0.322, 2.637e-5  
0.321, 2.642e-5



0.320, 2.633e-5  
0.319, 2.635e-5  
0.318, 2.647e-5  
0.317, 2.657e-5  
0.316, 2.656e-5  
0.315, 2.665e-5  
0.314, 2.695e-5  
0.313, 2.695e-5  
0.312, 2.698e-5  
0.311, 2.725e-5  
0.310, 2.734e-5  
0.309, 2.726e-5  
0.308, 2.710e-5  
0.307, 2.717e-5  
0.306, 2.726e-5  
0.305, 2.750e-5  
0.304, 2.742e-5  
0.303, 2.745e-5  
0.302, 2.740e-5  
0.301, 2.734e-5  
0.300, 2.746e-5  
0.299, 2.747e-5  
0.298, 2.758e-5  
0.297, 2.785e-5  
0.296, 2.778e-5  
0.295, 2.784e-5  
0.294, 2.790e-5  
0.293, 2.783e-5  
0.292, 2.786e-5  
0.291, 2.791e-5  
0.290, 2.790e-5  
0.289, 2.797e-5  
0.288, 2.805e-5  
0.287, 2.806e-5  
0.286, 2.819e-5  
0.285, 2.815e-5  
0.284, 2.835e-5  
0.283, 2.834e-5  
0.282, 2.848e-5  
0.281, 2.867e-5  
0.280, 2.869e-5  
0.279, 2.863e-5  
0.278, 2.857e-5  
0.277, 2.861e-5  
0.276, 2.883e-5  
0.275, 2.887e-5  
0.274, 2.880e-5  
0.273, 2.879e-5  
0.272, 2.878e-5  
0.271, 2.880e-5

0.270, 2.890e-5  
0.269, 2.915e-5  
0.268, 2.916e-5  
0.267, 2.905e-5  
0.266, 2.914e-5  
0.265, 2.930e-5  
0.264, 2.958e-5  
0.263, 2.953e-5  
0.262, 2.956e-5  
0.261, 2.965e-5  
0.260, 2.955e-5  
0.259, 2.953e-5  
0.258, 2.957e-5  
0.257, 2.965e-5  
0.256, 2.966e-5  
0.255, 2.987e-5  
0.254, 2.970e-5  
0.253, 2.987e-5  
0.252, 2.993e-5  
0.251, 2.990e-5  
0.250, 2.998e-5  
0.249, 3.008e-5  
0.248, 3.051e-5  
0.247, 3.052e-5  
0.246, 3.040e-5  
0.245, 3.040e-5  
0.244, 3.056e-5  
0.243, 3.071e-5  
0.242, 3.065e-5  
0.241, 3.081e-5  
0.240, 3.082e-5  
0.239, 3.079e-5  
0.238, 3.074e-5  
0.237, 3.092e-5  
0.236, 3.098e-5  
0.235, 3.115e-5  
0.234, 3.119e-5  
0.233, 3.135e-5  
0.232, 3.141e-5  
0.231, 3.141e-5  
0.230, 3.139e-5  
0.229, 3.145e-5  
0.228, 3.137e-5  
0.227, 3.149e-5  
0.226, 3.163e-5  
0.225, 3.155e-5  
0.224, 3.171e-5  
0.223, 3.170e-5  
0.222, 3.181e-5  
0.221, 3.218e-5

0.220, 3.210e-5  
0.219, 3.224e-5  
0.218, 3.238e-5  
0.217, 3.244e-5  
0.216, 3.246e-5  
0.215, 3.258e-5  
0.214, 3.260e-5  
0.213, 3.257e-5  
0.212, 3.271e-5  
0.211, 3.278e-5  
0.210, 3.284e-5  
0.209, 3.292e-5  
0.208, 3.307e-5  
0.207, 3.317e-5  
0.206, 3.336e-5  
0.205, 3.372e-5  
0.204, 3.371e-5  
0.203, 3.386e-5  
0.202, 3.400e-5  
0.201, 3.400e-5  
0.200, 3.406e-5  
0.199, 3.422e-5  
0.198, 3.442e-5  
0.197, 3.434e-5  
0.196, 3.434e-5  
0.195, 3.445e-5  
0.194, 3.456e-5  
0.193, 3.476e-5  
0.192, 3.486e-5  
0.191, 3.492e-5  
0.190, 3.529e-5  
0.189, 3.554e-5  
0.188, 3.569e-5  
0.187, 3.572e-5  
0.186, 3.590e-5  
0.185, 3.587e-5  
0.184, 3.591e-5  
0.183, 3.602e-5  
0.182, 3.625e-5  
0.181, 3.652e-5  
0.180, 3.655e-5  
0.179, 3.652e-5  
0.178, 3.660e-5  
0.177, 3.679e-5  
0.176, 3.711e-5  
0.175, 3.749e-5  
0.174, 3.762e-5  
0.173, 3.753e-5  
0.172, 3.768e-5  
0.171, 3.801e-5

0.170, 3.839e-5  
0.169, 3.844e-5  
0.168, 3.860e-5  
0.167, 3.866e-5  
0.166, 3.875e-5  
0.165, 3.898e-5  
0.164, 3.923e-5  
0.163, 3.955e-5  
0.162, 3.989e-5  
0.161, 4.009e-5  
0.160, 4.027e-5  
0.159, 4.058e-5  
0.158, 4.093e-5  
0.157, 4.101e-5  
0.156, 4.117e-5  
0.155, 4.139e-5  
0.154, 4.174e-5  
0.153, 4.198e-5  
0.152, 4.227e-5  
0.151, 4.259e-5  
0.150, 4.305e-5  
0.149, 4.331e-5  
0.148, 4.359e-5  
0.147, 4.394e-5  
0.146, 4.432e-5  
0.145, 4.468e-5  
0.144, 4.515e-5  
0.143, 4.561e-5  
0.142, 4.593e-5  
0.141, 4.635e-5  
0.140, 4.663e-5  
0.139, 4.710e-5  
0.138, 4.741e-5  
0.137, 4.785e-5  
0.136, 4.829e-5  
0.135, 4.863e-5  
0.134, 4.913e-5  
0.133, 4.950e-5  
0.132, 5.015e-5  
0.131, 5.084e-5  
0.130, 5.127e-5  
0.129, 5.182e-5  
0.128, 5.227e-5  
0.127, 5.263e-5  
0.126, 5.289e-5  
0.125, 5.354e-5  
0.124, 5.405e-5  
0.123, 5.435e-5  
0.122, 5.485e-5  
0.121, 5.523e-5

0.120, 5.557e-5  
0.119, 5.606e-5  
0.118, 5.656e-5  
0.117, 5.686e-5  
0.116, 5.723e-5  
0.115, 5.779e-5  
0.114, 5.811e-5  
0.113, 5.855e-5  
0.112, 5.883e-5  
0.111, 5.920e-5  
0.110, 5.944e-5  
0.109, 5.981e-5  
0.108, 6.019e-5  
0.107, 6.059e-5  
0.106, 6.075e-5  
0.105, 6.103e-5  
0.104, 6.132e-5  
0.103, 6.161e-5  
0.102, 6.207e-5  
0.101, 6.229e-5  
0.100, 6.251e-5  
0.099, 6.275e-5  
0.098, 6.290e-5  
0.097, 6.310e-5  
0.096, 6.336e-5  
0.095, 6.361e-5  
0.094, 6.382e-5  
0.093, 6.405e-5  
0.092, 6.415e-5  
0.091, 6.457e-5  
0.090, 6.470e-5  
0.089, 6.492e-5  
0.088, 6.517e-5  
0.087, 6.506e-5  
0.086, 6.514e-5  
0.085, 6.528e-5  
0.084, 6.545e-5  
0.083, 6.580e-5  
0.082, 6.595e-5  
0.081, 6.598e-5  
0.080, 6.607e-5  
0.079, 6.603e-5  
0.078, 6.625e-5  
0.077, 6.623e-5  
0.076, 6.638e-5  
0.075, 6.634e-5  
0.074, 6.663e-5  
0.073, 6.662e-5  
0.072, 6.670e-5  
0.071, 6.673e-5

0.070, 6.698e-5  
0.069, 6.685e-5  
0.068, 6.704e-5  
0.067, 6.715e-5  
0.066, 6.709e-5  
0.065, 6.716e-5  
0.064, 6.704e-5  
0.063, 6.714e-5  
0.062, 6.715e-5  
0.061, 6.720e-5  
0.060, 6.720e-5  
0.059, 6.729e-5  
0.058, 6.759e-5  
0.057, 6.788e-5  
0.056, 6.779e-5  
0.055, 6.776e-5  
0.054, 6.785e-5  
0.053, 6.789e-5  
0.052, 6.789e-5  
0.051, 6.766e-5  
0.050, 6.764e-5  
0.049, 6.790e-5  
0.048, 6.777e-5  
0.047, 6.785e-5  
0.046, 6.801e-5  
0.045, 6.803e-5  
0.044, 6.795e-5  
0.043, 6.796e-5  
0.042, 6.795e-5  
0.041, 6.797e-5  
0.040, 6.800e-5  
0.039, 6.820e-5  
0.038, 6.825e-5  
0.037, 6.824e-5  
0.036, 6.813e-5  
0.035, 6.827e-5  
0.034, 6.852e-5  
0.033, 6.849e-5  
0.032, 6.837e-5  
0.031, 6.829e-5  
0.030, 6.848e-5  
0.029, 6.855e-5  
0.028, 6.849e-5  
0.027, 6.853e-5  
0.026, 6.866e-5  
0.025, 6.861e-5  
0.024, 6.866e-5  
0.023, 6.860e-5  
0.022, 6.858e-5  
0.021, 6.845e-5

0.020, 6.843e-5  
0.019, 6.851e-5  
0.018, 6.854e-5  
0.017, 6.858e-5  
0.016, 6.868e-5  
0.015, 6.887e-5  
0.014, 6.902e-5  
0.013, 6.900e-5  
0.012, 6.884e-5  
0.011, 6.907e-5  
0.010, 6.917e-5  
0.009, 6.921e-5  
0.008, 6.940e-5  
0.007, 6.933e-5  
0.006, 6.932e-5  
0.005, 6.927e-5  
0.004, 6.934e-5  
0.003, 6.930e-5  
0.002, 6.940e-5  
0.001, 6.955e-5  
0.000, 6.984e-5  
-0.001, 6.978e-5  
-0.002, 6.970e-5  
-0.003, 6.990e-5  
-0.004, 6.995e-5  
-0.005, 6.980e-5  
-0.006, 6.972e-5  
-0.007, 6.993e-5  
-0.008, 7.000e-5  
-0.009, 6.993e-5  
-0.010, 6.991e-5  
-0.011, 6.989e-5  
-0.012, 6.986e-5  
-0.013, 6.984e-5  
-0.014, 7.015e-5  
-0.015, 7.020e-5  
-0.016, 7.024e-5  
-0.017, 7.035e-5  
-0.018, 7.032e-5  
-0.019, 7.037e-5  
-0.020, 7.029e-5  
-0.021, 7.019e-5  
-0.022, 7.055e-5  
-0.023, 7.037e-5  
-0.024, 7.051e-5  
-0.025, 7.054e-5  
-0.026, 7.037e-5  
-0.027, 7.047e-5  
-0.028, 7.032e-5  
-0.029, 7.040e-5

-0.030, 7.078e-5  
-0.031, 7.060e-5  
-0.032, 7.064e-5  
-0.033, 7.062e-5  
-0.034, 7.076e-5  
-0.035, 7.071e-5  
-0.036, 7.069e-5  
-0.037, 7.067e-5  
-0.038, 7.071e-5  
-0.039, 7.077e-5  
-0.040, 7.071e-5  
-0.041, 7.064e-5  
-0.042, 7.073e-5  
-0.043, 7.081e-5  
-0.044, 7.099e-5  
-0.045, 7.138e-5  
-0.046, 7.131e-5  
-0.047, 7.135e-5  
-0.048, 7.134e-5  
-0.049, 7.148e-5  
-0.050, 7.153e-5  
-0.051, 7.147e-5  
-0.052, 7.154e-5  
-0.053, 7.153e-5  
-0.054, 7.145e-5  
-0.055, 7.136e-5  
-0.056, 7.126e-5  
-0.057, 7.143e-5  
-0.058, 7.149e-5  
-0.059, 7.168e-5  
-0.060, 7.168e-5  
-0.061, 7.175e-5  
-0.062, 7.174e-5  
-0.063, 7.171e-5  
-0.064, 7.175e-5  
-0.065, 7.192e-5  
-0.066, 7.192e-5  
-0.067, 7.191e-5  
-0.068, 7.175e-5  
-0.069, 7.170e-5  
-0.070, 7.175e-5  
-0.071, 7.165e-5  
-0.072, 7.203e-5  
-0.073, 7.204e-5  
-0.074, 7.210e-5  
-0.075, 7.217e-5  
-0.076, 7.207e-5  
-0.077, 7.217e-5  
-0.078, 7.231e-5  
-0.079, 7.227e-5



-0.080, 7.224e-5  
-0.081, 7.239e-5  
-0.082, 7.228e-5  
-0.083, 7.227e-5  
-0.084, 7.219e-5  
-0.085, 7.244e-5  
-0.086, 7.228e-5  
-0.087, 7.238e-5  
-0.088, 7.236e-5  
-0.089, 7.247e-5  
-0.090, 7.252e-5  
-0.091, 7.266e-5  
-0.092, 7.273e-5  
-0.093, 7.259e-5  
-0.094, 7.269e-5  
-0.095, 7.272e-5  
-0.096, 7.301e-5  
-0.097, 7.294e-5  
-0.098, 7.281e-5  
-0.099, 7.296e-5  
-0.100, 7.307e-5  
-0.101, 7.288e-5  
-0.102, 7.288e-5  
-0.103, 7.306e-5  
-0.104, 7.301e-5  
-0.105, 7.310e-5  
-0.106, 7.309e-5  
-0.107, 7.310e-5  
-0.108, 7.317e-5  
-0.109, 7.327e-5  
-0.110, 7.334e-5  
-0.111, 7.351e-5  
-0.112, 7.326e-5  
-0.113, 7.309e-5  
-0.114, 7.316e-5  
-0.115, 7.328e-5  
-0.116, 7.340e-5  
-0.117, 7.350e-5  
-0.118, 7.360e-5  
-0.119, 7.350e-5  
-0.120, 7.372e-5  
-0.121, 7.373e-5  
-0.122, 7.402e-5  
-0.123, 7.370e-5  
-0.124, 7.359e-5  
-0.125, 7.370e-5  
-0.126, 7.372e-5  
-0.127, 7.421e-5  
-0.128, 7.406e-5  
-0.129, 7.407e-5

-0.130, 7.419e-5  
-0.131, 7.427e-5  
-0.132, 7.419e-5  
-0.133, 7.418e-5  
-0.134, 7.434e-5  
-0.135, 7.455e-5  
-0.136, 7.460e-5  
-0.137, 7.451e-5  
-0.138, 7.452e-5  
-0.139, 7.445e-5  
-0.140, 7.469e-5  
-0.141, 7.494e-5  
-0.142, 7.473e-5  
-0.143, 7.463e-5  
-0.144, 7.480e-5  
-0.145, 7.471e-5  
-0.146, 7.458e-5  
-0.147, 7.477e-5  
-0.148, 7.478e-5  
-0.149, 7.479e-5  
-0.150, 7.496e-5  
-0.151, 7.512e-5  
-0.152, 7.500e-5  
-0.153, 7.510e-5  
-0.154, 7.506e-5  
-0.155, 7.508e-5  
-0.156, 7.496e-5  
-0.157, 7.506e-5  
-0.158, 7.511e-5  
-0.159, 7.496e-5  
-0.160, 7.498e-5  
-0.161, 7.508e-5  
-0.162, 7.515e-5  
-0.163, 7.524e-5  
-0.164, 7.531e-5  
-0.165, 7.533e-5  
-0.166, 7.550e-5  
-0.167, 7.552e-5  
-0.168, 7.553e-5  
-0.169, 7.544e-5  
-0.170, 7.557e-5  
-0.171, 7.560e-5  
-0.172, 7.581e-5  
-0.173, 7.563e-5  
-0.174, 7.555e-5  
-0.175, 7.552e-5  
-0.176, 7.560e-5  
-0.177, 7.562e-5  
-0.178, 7.585e-5  
-0.179, 7.596e-5

-0.180, 7.619e-5  
-0.181, 7.607e-5  
-0.182, 7.618e-5  
-0.183, 7.610e-5  
-0.184, 7.595e-5  
-0.185, 7.603e-5  
-0.186, 7.603e-5  
-0.187, 7.592e-5  
-0.188, 7.617e-5  
-0.189, 7.622e-5  
-0.190, 7.629e-5  
-0.191, 7.610e-5  
-0.192, 7.641e-5  
-0.193, 7.639e-5  
-0.194, 7.640e-5  
-0.195, 7.639e-5  
-0.196, 7.653e-5  
-0.197, 7.640e-5  
-0.198, 7.638e-5  
-0.199, 7.652e-5  
-0.200, 7.653e-5  
-0.201, 7.656e-5  
-0.202, 7.641e-5  
-0.203, 7.646e-5  
-0.204, 7.650e-5  
-0.205, 7.668e-5  
-0.206, 7.673e-5  
-0.207, 7.679e-5  
-0.208, 7.695e-5  
-0.209, 7.705e-5  
-0.210, 7.715e-5  
-0.211, 7.780e-5  
-0.212, 7.800e-5  
-0.213, 7.778e-5  
-0.214, 7.784e-5  
-0.215, 7.775e-5  
-0.216, 7.769e-5  
-0.217, 7.771e-5  
-0.218, 7.776e-5  
-0.219, 7.782e-5  
-0.220, 7.798e-5  
-0.221, 7.792e-5  
-0.222, 7.791e-5  
-0.223, 7.808e-5  
-0.224, 7.791e-5  
-0.225, 7.805e-5  
-0.226, 7.822e-5  
-0.227, 7.824e-5  
-0.228, 7.833e-5  
-0.229, 7.835e-5

-0.230, 7.828e-5  
-0.231, 7.825e-5  
-0.232, 7.831e-5  
-0.233, 7.834e-5  
-0.234, 7.835e-5  
-0.235, 7.851e-5  
-0.236, 7.857e-5  
-0.237, 7.852e-5  
-0.238, 7.874e-5  
-0.239, 7.896e-5  
-0.240, 7.895e-5  
-0.241, 7.894e-5  
-0.242, 7.892e-5  
-0.243, 7.914e-5  
-0.244, 7.928e-5  
-0.245, 7.914e-5  
-0.246, 7.904e-5  
-0.247, 7.917e-5  
-0.248, 7.917e-5  
-0.249, 7.961e-5  
-0.250, 7.989e-5  
-0.251, 7.989e-5  
-0.252, 7.990e-5  
-0.253, 8.033e-5  
-0.254, 8.032e-5  
-0.255, 8.029e-5  
-0.256, 8.027e-5  
-0.257, 8.046e-5  
-0.258, 8.072e-5  
-0.259, 8.089e-5  
-0.260, 8.110e-5  
-0.261, 8.111e-5  
-0.262, 8.146e-5  
-0.263, 8.172e-5  
-0.264, 8.205e-5  
-0.265, 8.230e-5  
-0.266, 8.240e-5  
-0.267, 8.261e-5  
-0.268, 8.313e-5  
-0.269, 8.332e-5  
-0.270, 8.375e-5  
-0.271, 8.392e-5  
-0.272, 8.414e-5  
-0.273, 8.460e-5  
-0.274, 8.546e-5  
-0.275, 8.583e-5  
-0.276, 8.593e-5  
-0.277, 8.620e-5  
-0.278, 8.669e-5  
-0.279, 8.724e-5

-0.280, 8.795e-5  
-0.281, 8.860e-5  
-0.282, 8.911e-5  
-0.283, 8.980e-5  
-0.284, 9.039e-5  
-0.285, 9.115e-5  
-0.286, 9.160e-5  
-0.287, 9.224e-5  
-0.288, 9.334e-5  
-0.289, 9.401e-5  
-0.290, 9.491e-5  
-0.291, 9.547e-5  
-0.292, 9.652e-5  
-0.293, 9.735e-5  
-0.294, 9.817e-5  
-0.295, 9.912e-5  
-0.296, 1.002e-4  
-0.297, 1.013e-4  
-0.298, 1.023e-4  
-0.299, 1.033e-4  
-0.300, 1.044e-4  
-0.301, 1.052e-4  
-0.302, 1.060e-4  
-0.303, 1.076e-4  
-0.304, 1.088e-4  
-0.305, 1.104e-4  
-0.306, 1.112e-4  
-0.307, 1.122e-4  
-0.308, 1.133e-4  
-0.309, 1.145e-4  
-0.310, 1.157e-4  
-0.311, 1.171e-4  
-0.312, 1.183e-4  
-0.313, 1.192e-4  
-0.314, 1.205e-4  
-0.315, 1.217e-4  
-0.316, 1.226e-4  
-0.317, 1.235e-4  
-0.318, 1.255e-4  
-0.319, 1.265e-4  
-0.320, 1.277e-4  
-0.321, 1.289e-4  
-0.322, 1.298e-4  
-0.323, 1.310e-4  
-0.324, 1.323e-4  
-0.325, 1.333e-4  
-0.326, 1.345e-4  
-0.327, 1.355e-4  
-0.328, 1.364e-4  
-0.329, 1.375e-4

-0.330, 1.382e-4  
-0.331, 1.391e-4  
-0.332, 1.398e-4  
-0.333, 1.412e-4  
-0.334, 1.422e-4  
-0.335, 1.428e-4  
-0.336, 1.439e-4  
-0.337, 1.448e-4  
-0.338, 1.457e-4  
-0.339, 1.464e-4  
-0.340, 1.472e-4  
-0.341, 1.479e-4  
-0.342, 1.486e-4  
-0.343, 1.490e-4  
-0.344, 1.500e-4  
-0.345, 1.503e-4  
-0.346, 1.509e-4  
-0.347, 1.519e-4  
-0.348, 1.529e-4  
-0.349, 1.535e-4  
-0.350, 1.537e-4  
-0.351, 1.541e-4  
-0.352, 1.547e-4  
-0.353, 1.555e-4  
-0.354, 1.560e-4  
-0.355, 1.567e-4  
-0.356, 1.572e-4  
-0.357, 1.577e-4  
-0.358, 1.579e-4  
-0.359, 1.589e-4  
-0.360, 1.590e-4  
-0.361, 1.591e-4  
-0.362, 1.598e-4  
-0.363, 1.602e-4  
-0.364, 1.607e-4  
-0.365, 1.607e-4  
-0.366, 1.610e-4  
-0.367, 1.614e-4  
-0.368, 1.618e-4  
-0.369, 1.625e-4  
-0.370, 1.630e-4  
-0.371, 1.635e-4  
-0.372, 1.637e-4  
-0.373, 1.641e-4  
-0.374, 1.645e-4  
-0.375, 1.646e-4  
-0.376, 1.647e-4  
-0.377, 1.654e-4  
-0.378, 1.655e-4  
-0.379, 1.657e-4

-0.380, 1.659e-4  
-0.381, 1.661e-4  
-0.382, 1.664e-4  
-0.383, 1.669e-4  
-0.384, 1.673e-4  
-0.385, 1.677e-4  
-0.386, 1.680e-4  
-0.387, 1.682e-4  
-0.388, 1.684e-4  
-0.389, 1.687e-4  
-0.390, 1.688e-4  
-0.391, 1.688e-4  
-0.392, 1.695e-4  
-0.393, 1.697e-4  
-0.394, 1.698e-4  
-0.395, 1.699e-4  
-0.396, 1.703e-4  
-0.397, 1.706e-4  
-0.398, 1.709e-4  
-0.399, 1.712e-4

Mar. 29, 2021 05:06:49

Linear Sweep Voltammetry

File: c:\users\shadji04\desktop\sofia cv\29032021\complex 6 sweep scan under nitrogen ph 2.5\300 rpm.txt

Data Source: Experiment

Instrument Model: CHI650E

Header:

Note: 300 rpm

Init E (V) = 0.8

Final E (V) = -0.4

Scan Rate (V/s) = 0.025

Sample Interval (V) = 0.001

Quiet Time (sec) = 2

Sensitivity (A/V) = 0.01

Potential/V, Current/A

0.800, -4.531e-5

0.799, -4.497e-5

0.798, -4.460e-5

0.797, -4.424e-5

0.796, -4.401e-5

0.795, -4.385e-5

0.794, -4.350e-5

0.793, -4.327e-5

0.792, -4.303e-5

0.791, -4.255e-5

0.790, -4.219e-5

0.789, -4.196e-5

0.788, -4.178e-5

0.787, -4.152e-5

0.786, -4.138e-5

0.785, -4.103e-5  
0.784, -4.083e-5  
0.783, -4.076e-5  
0.782, -4.035e-5  
0.781, -4.010e-5  
0.780, -4.012e-5  
0.779, -3.988e-5  
0.778, -3.969e-5  
0.777, -3.940e-5  
0.776, -3.924e-5  
0.775, -3.901e-5  
0.774, -3.864e-5  
0.773, -3.849e-5  
0.772, -3.840e-5  
0.771, -3.815e-5  
0.770, -3.788e-5  
0.769, -3.777e-5  
0.768, -3.746e-5  
0.767, -3.727e-5  
0.766, -3.720e-5  
0.765, -3.689e-5  
0.764, -3.664e-5  
0.763, -3.638e-5  
0.762, -3.630e-5  
0.761, -3.613e-5  
0.760, -3.585e-5  
0.759, -3.570e-5  
0.758, -3.533e-5  
0.757, -3.514e-5  
0.756, -3.513e-5  
0.755, -3.493e-5  
0.754, -3.472e-5  
0.753, -3.447e-5  
0.752, -3.435e-5  
0.751, -3.411e-5  
0.750, -3.397e-5  
0.749, -3.382e-5  
0.748, -3.349e-5  
0.747, -3.314e-5  
0.746, -3.293e-5  
0.745, -3.266e-5  
0.744, -3.252e-5  
0.743, -3.255e-5  
0.742, -3.244e-5  
0.741, -3.227e-5  
0.740, -3.214e-5  
0.739, -3.178e-5  
0.738, -3.137e-5  
0.737, -3.117e-5  
0.736, -3.087e-5



0.735, -3.082e-5  
0.734, -3.079e-5  
0.733, -3.071e-5  
0.732, -3.055e-5  
0.731, -3.022e-5  
0.730, -3.015e-5  
0.729, -3.007e-5  
0.728, -2.997e-5  
0.727, -2.951e-5  
0.726, -2.943e-5  
0.725, -2.932e-5  
0.724, -2.892e-5  
0.723, -2.881e-5  
0.722, -2.884e-5  
0.721, -2.867e-5  
0.720, -2.837e-5  
0.719, -2.839e-5  
0.718, -2.823e-5  
0.717, -2.810e-5  
0.716, -2.798e-5  
0.715, -2.794e-5  
0.714, -2.777e-5  
0.713, -2.749e-5  
0.712, -2.730e-5  
0.711, -2.710e-5  
0.710, -2.703e-5  
0.709, -2.693e-5  
0.708, -2.664e-5  
0.707, -2.655e-5  
0.706, -2.646e-5  
0.705, -2.631e-5  
0.704, -2.614e-5  
0.703, -2.600e-5  
0.702, -2.575e-5  
0.701, -2.532e-5  
0.700, -2.527e-5  
0.699, -2.534e-5  
0.698, -2.496e-5  
0.697, -2.506e-5  
0.696, -2.493e-5  
0.695, -2.466e-5  
0.694, -2.462e-5  
0.693, -2.460e-5  
0.692, -2.448e-5  
0.691, -2.430e-5  
0.690, -2.425e-5  
0.689, -2.424e-5  
0.688, -2.386e-5  
0.687, -2.380e-5  
0.686, -2.386e-5

0.685, -2.371e-5  
0.684, -2.361e-5  
0.683, -2.344e-5  
0.682, -2.342e-5  
0.681, -2.326e-5  
0.680, -2.314e-5  
0.679, -2.295e-5  
0.678, -2.282e-5  
0.677, -2.273e-5  
0.676, -2.268e-5  
0.675, -2.253e-5  
0.674, -2.238e-5  
0.673, -2.230e-5  
0.672, -2.227e-5  
0.671, -2.209e-5  
0.670, -2.198e-5  
0.669, -2.178e-5  
0.668, -2.146e-5  
0.667, -2.135e-5  
0.666, -2.152e-5  
0.665, -2.122e-5  
0.664, -2.114e-5  
0.663, -2.114e-5  
0.662, -2.119e-5  
0.661, -2.112e-5  
0.660, -2.106e-5  
0.659, -2.092e-5  
0.658, -2.076e-5  
0.657, -2.060e-5  
0.656, -2.058e-5  
0.655, -2.048e-5  
0.654, -2.036e-5  
0.653, -2.028e-5  
0.652, -2.029e-5  
0.651, -2.017e-5  
0.650, -2.005e-5  
0.649, -1.992e-5  
0.648, -1.992e-5  
0.647, -1.980e-5  
0.646, -1.978e-5  
0.645, -1.941e-5  
0.644, -1.936e-5  
0.643, -1.933e-5  
0.642, -1.922e-5  
0.641, -1.901e-5  
0.640, -1.903e-5  
0.639, -1.910e-5  
0.638, -1.914e-5  
0.637, -1.913e-5  
0.636, -1.901e-5

0.635, -1.892e-5  
0.634, -1.885e-5  
0.633, -1.878e-5  
0.632, -1.874e-5  
0.631, -1.864e-5  
0.630, -1.859e-5  
0.629, -1.845e-5  
0.628, -1.835e-5  
0.627, -1.825e-5  
0.626, -1.815e-5  
0.625, -1.812e-5  
0.624, -1.801e-5  
0.623, -1.780e-5  
0.622, -1.786e-5  
0.621, -1.782e-5  
0.620, -1.767e-5  
0.619, -1.749e-5  
0.618, -1.749e-5  
0.617, -1.755e-5  
0.616, -1.746e-5  
0.615, -1.725e-5  
0.614, -1.714e-5  
0.613, -1.718e-5  
0.612, -1.720e-5  
0.611, -1.714e-5  
0.610, -1.703e-5  
0.609, -1.682e-5  
0.608, -1.654e-5  
0.607, -1.659e-5  
0.606, -1.670e-5  
0.605, -1.667e-5  
0.604, -1.660e-5  
0.603, -1.648e-5  
0.602, -1.643e-5  
0.601, -1.603e-5  
0.600, -1.617e-5  
0.599, -1.614e-5  
0.598, -1.612e-5  
0.597, -1.611e-5  
0.596, -1.606e-5  
0.595, -1.598e-5  
0.594, -1.594e-5  
0.593, -1.565e-5  
0.592, -1.570e-5  
0.591, -1.573e-5  
0.590, -1.561e-5  
0.589, -1.545e-5  
0.588, -1.545e-5  
0.587, -1.544e-5  
0.586, -1.535e-5

0.585, -1.519e-5  
0.584, -1.504e-5  
0.583, -1.504e-5  
0.582, -1.503e-5  
0.581, -1.497e-5  
0.580, -1.477e-5  
0.579, -1.432e-5  
0.578, -1.439e-5  
0.577, -1.447e-5  
0.576, -1.419e-5  
0.575, -1.419e-5  
0.574, -1.423e-5  
0.573, -1.398e-5  
0.572, -1.401e-5  
0.571, -1.403e-5  
0.570, -1.399e-5  
0.569, -1.393e-5  
0.568, -1.382e-5  
0.567, -1.379e-5  
0.566, -1.360e-5  
0.565, -1.336e-5  
0.564, -1.346e-5  
0.563, -1.340e-5  
0.562, -1.324e-5  
0.561, -1.328e-5  
0.560, -1.313e-5  
0.559, -1.300e-5  
0.558, -1.294e-5  
0.557, -1.287e-5  
0.556, -1.286e-5  
0.555, -1.273e-5  
0.554, -1.245e-5  
0.553, -1.251e-5  
0.552, -1.218e-5  
0.551, -1.212e-5  
0.550, -1.204e-5  
0.549, -1.197e-5  
0.548, -1.188e-5  
0.547, -1.174e-5  
0.546, -1.150e-5  
0.545, -1.144e-5  
0.544, -1.141e-5  
0.543, -1.118e-5  
0.542, -1.108e-5  
0.541, -1.099e-5  
0.540, -1.091e-5  
0.539, -1.059e-5  
0.538, -1.035e-5  
0.537, -1.050e-5  
0.536, -1.042e-5

0.535, -1.028e-5  
0.534, -1.019e-5  
0.533, -9.791e-6  
0.532, -9.781e-6  
0.531, -9.506e-6  
0.530, -9.378e-6  
0.529, -9.368e-6  
0.528, -9.240e-6  
0.527, -9.024e-6  
0.526, -8.985e-6  
0.525, -8.897e-6  
0.524, -8.523e-6  
0.523, -8.455e-6  
0.522, -8.209e-6  
0.521, -7.904e-6  
0.520, -7.885e-6  
0.519, -7.551e-6  
0.518, -7.374e-6  
0.517, -7.384e-6  
0.516, -7.295e-6  
0.515, -7.020e-6  
0.514, -6.902e-6  
0.513, -6.539e-6  
0.512, -6.264e-6  
0.511, -6.008e-6  
0.510, -5.959e-6  
0.509, -5.841e-6  
0.508, -5.743e-6  
0.507, -5.566e-6  
0.506, -5.340e-6  
0.505, -5.055e-6  
0.504, -4.653e-6  
0.503, -4.545e-6  
0.502, -4.466e-6  
0.501, -4.211e-6  
0.500, -3.857e-6  
0.499, -3.464e-6  
0.498, -3.376e-6  
0.497, -3.297e-6  
0.496, -3.022e-6  
0.495, -2.806e-6  
0.494, -2.639e-6  
0.493, -2.324e-6  
0.492, -2.138e-6  
0.491, -1.647e-6  
0.490, -1.401e-6  
0.489, -1.254e-6  
0.488, -9.392e-7  
0.487, -7.231e-7  
0.486, -5.560e-7

0.485, -3.203e-7  
0.484, -5.502e-8  
0.483, 3.183e-7  
0.482, 5.442e-7  
0.481, 8.488e-7  
0.480, 1.104e-6  
0.479, 1.399e-6  
0.478, 1.713e-6  
0.477, 2.087e-6  
0.476, 2.391e-6  
0.475, 2.656e-6  
0.474, 3.079e-6  
0.473, 3.275e-6  
0.472, 3.501e-6  
0.471, 3.796e-6  
0.470, 4.061e-6  
0.469, 4.326e-6  
0.468, 4.700e-6  
0.467, 4.975e-6  
0.466, 5.319e-6  
0.465, 5.692e-6  
0.464, 6.056e-6  
0.463, 6.399e-6  
0.462, 6.586e-6  
0.461, 6.930e-6  
0.460, 7.313e-6  
0.459, 7.676e-6  
0.458, 7.942e-6  
0.457, 8.119e-6  
0.456, 8.345e-6  
0.455, 8.629e-6  
0.454, 8.904e-6  
0.453, 9.150e-6  
0.452, 9.523e-6  
0.451, 9.828e-6  
0.450, 1.007e-5  
0.449, 1.039e-5  
0.448, 1.064e-5  
0.447, 1.097e-5  
0.446, 1.131e-5  
0.445, 1.165e-5  
0.444, 1.195e-5  
0.443, 1.213e-5  
0.442, 1.242e-5  
0.441, 1.267e-5  
0.440, 1.295e-5  
0.439, 1.357e-5  
0.438, 1.380e-5  
0.437, 1.392e-5  
0.436, 1.398e-5

0.435, 1.426e-5  
0.434, 1.465e-5  
0.433, 1.488e-5  
0.432, 1.505e-5  
0.431, 1.532e-5  
0.430, 1.546e-5  
0.429, 1.559e-5  
0.428, 1.577e-5  
0.427, 1.613e-5  
0.426, 1.635e-5  
0.425, 1.662e-5  
0.424, 1.679e-5  
0.423, 1.694e-5  
0.422, 1.714e-5  
0.421, 1.733e-5  
0.420, 1.749e-5  
0.419, 1.802e-5  
0.418, 1.832e-5  
0.417, 1.836e-5  
0.416, 1.844e-5  
0.415, 1.860e-5  
0.414, 1.904e-5  
0.413, 1.940e-5  
0.412, 1.945e-5  
0.411, 1.968e-5  
0.410, 1.995e-5  
0.409, 2.018e-5  
0.408, 2.021e-5  
0.407, 2.028e-5  
0.406, 2.032e-5  
0.405, 2.052e-5  
0.404, 2.075e-5  
0.403, 2.094e-5  
0.402, 2.116e-5  
0.401, 2.147e-5  
0.400, 2.165e-5  
0.399, 2.185e-5  
0.398, 2.205e-5  
0.397, 2.223e-5  
0.396, 2.237e-5  
0.395, 2.255e-5  
0.394, 2.277e-5  
0.393, 2.318e-5  
0.392, 2.328e-5  
0.391, 2.342e-5  
0.390, 2.361e-5  
0.389, 2.380e-5  
0.388, 2.396e-5  
0.387, 2.412e-5  
0.386, 2.428e-5

0.385, 2.450e-5  
0.384, 2.473e-5  
0.383, 2.497e-5  
0.382, 2.515e-5  
0.381, 2.534e-5  
0.380, 2.549e-5  
0.379, 2.564e-5  
0.378, 2.585e-5  
0.377, 2.616e-5  
0.376, 2.643e-5  
0.375, 2.672e-5  
0.374, 2.709e-5  
0.373, 2.741e-5  
0.372, 2.759e-5  
0.371, 2.768e-5  
0.370, 2.770e-5  
0.369, 2.778e-5  
0.368, 2.796e-5  
0.367, 2.816e-5  
0.366, 2.857e-5  
0.365, 2.870e-5  
0.364, 2.891e-5  
0.363, 2.938e-5  
0.362, 2.948e-5  
0.361, 2.955e-5  
0.360, 2.964e-5  
0.359, 3.000e-5  
0.358, 3.034e-5  
0.357, 3.063e-5  
0.356, 3.082e-5  
0.355, 3.096e-5  
0.354, 3.093e-5  
0.353, 3.112e-5  
0.352, 3.139e-5  
0.351, 3.177e-5  
0.350, 3.215e-5  
0.349, 3.219e-5  
0.348, 3.228e-5  
0.347, 3.276e-5  
0.346, 3.306e-5  
0.345, 3.297e-5  
0.344, 3.322e-5  
0.343, 3.354e-5  
0.342, 3.359e-5  
0.341, 3.370e-5  
0.340, 3.400e-5  
0.339, 3.440e-5  
0.338, 3.454e-5  
0.337, 3.466e-5  
0.336, 3.482e-5



0.335, 3.502e-5  
0.334, 3.517e-5  
0.333, 3.534e-5  
0.332, 3.569e-5  
0.331, 3.610e-5  
0.330, 3.630e-5  
0.329, 3.647e-5  
0.328, 3.667e-5  
0.327, 3.669e-5  
0.326, 3.687e-5  
0.325, 3.701e-5  
0.324, 3.731e-5  
0.323, 3.751e-5  
0.322, 3.764e-5  
0.321, 3.810e-5  
0.320, 3.798e-5  
0.319, 3.831e-5  
0.318, 3.862e-5  
0.317, 3.861e-5  
0.316, 3.882e-5  
0.315, 3.904e-5  
0.314, 3.909e-5  
0.313, 3.940e-5  
0.312, 3.955e-5  
0.311, 3.947e-5  
0.310, 3.969e-5  
0.309, 3.989e-5  
0.308, 4.002e-5  
0.307, 4.004e-5  
0.306, 4.019e-5  
0.305, 4.027e-5  
0.304, 4.051e-5  
0.303, 4.069e-5  
0.302, 4.087e-5  
0.301, 4.110e-5  
0.300, 4.116e-5  
0.299, 4.137e-5  
0.298, 4.160e-5  
0.297, 4.169e-5  
0.296, 4.187e-5  
0.295, 4.209e-5  
0.294, 4.211e-5  
0.293, 4.214e-5  
0.292, 4.223e-5  
0.291, 4.258e-5  
0.290, 4.282e-5  
0.289, 4.288e-5  
0.288, 4.299e-5  
0.287, 4.292e-5  
0.286, 4.302e-5

0.285, 4.319e-5  
0.284, 4.350e-5  
0.283, 4.356e-5  
0.282, 4.375e-5  
0.281, 4.395e-5  
0.280, 4.406e-5  
0.279, 4.417e-5  
0.278, 4.425e-5  
0.277, 4.429e-5  
0.276, 4.440e-5  
0.275, 4.484e-5  
0.274, 4.488e-5  
0.273, 4.489e-5  
0.272, 4.503e-5  
0.271, 4.509e-5  
0.270, 4.533e-5  
0.269, 4.554e-5  
0.268, 4.556e-5  
0.267, 4.565e-5  
0.266, 4.565e-5  
0.265, 4.559e-5  
0.264, 4.587e-5  
0.263, 4.615e-5  
0.262, 4.609e-5  
0.261, 4.619e-5  
0.260, 4.612e-5  
0.259, 4.634e-5  
0.258, 4.665e-5  
0.257, 4.686e-5  
0.256, 4.696e-5  
0.255, 4.714e-5  
0.254, 4.715e-5  
0.253, 4.703e-5  
0.252, 4.706e-5  
0.251, 4.732e-5  
0.250, 4.761e-5  
0.249, 4.752e-5  
0.248, 4.767e-5  
0.247, 4.777e-5  
0.246, 4.779e-5  
0.245, 4.779e-5  
0.244, 4.787e-5  
0.243, 4.808e-5  
0.242, 4.831e-5  
0.241, 4.845e-5  
0.240, 4.856e-5  
0.239, 4.861e-5  
0.238, 4.854e-5  
0.237, 4.883e-5  
0.236, 4.903e-5

0.235, 4.890e-5  
0.234, 4.885e-5  
0.233, 4.888e-5  
0.232, 4.886e-5  
0.231, 4.936e-5  
0.230, 4.946e-5  
0.229, 4.941e-5  
0.228, 4.940e-5  
0.227, 4.950e-5  
0.226, 4.959e-5  
0.225, 4.985e-5  
0.224, 5.022e-5  
0.223, 5.012e-5  
0.222, 5.044e-5  
0.221, 5.034e-5  
0.220, 5.038e-5  
0.219, 5.034e-5  
0.218, 5.053e-5  
0.217, 5.064e-5  
0.216, 5.067e-5  
0.215, 5.075e-5  
0.214, 5.083e-5  
0.213, 5.108e-5  
0.212, 5.133e-5  
0.211, 5.142e-5  
0.210, 5.134e-5  
0.209, 5.144e-5  
0.208, 5.169e-5  
0.207, 5.196e-5  
0.206, 5.209e-5  
0.205, 5.188e-5  
0.204, 5.212e-5  
0.203, 5.229e-5  
0.202, 5.219e-5  
0.201, 5.242e-5  
0.200, 5.246e-5  
0.199, 5.246e-5  
0.198, 5.272e-5  
0.197, 5.267e-5  
0.196, 5.272e-5  
0.195, 5.324e-5  
0.194, 5.320e-5  
0.193, 5.317e-5  
0.192, 5.320e-5  
0.191, 5.328e-5  
0.190, 5.333e-5  
0.189, 5.376e-5  
0.188, 5.394e-5  
0.187, 5.385e-5  
0.186, 5.385e-5

0.185, 5.385e-5  
0.184, 5.393e-5  
0.183, 5.418e-5  
0.182, 5.461e-5  
0.181, 5.453e-5  
0.180, 5.447e-5  
0.179, 5.444e-5  
0.178, 5.458e-5  
0.177, 5.468e-5  
0.176, 5.484e-5  
0.175, 5.496e-5  
0.174, 5.507e-5  
0.173, 5.521e-5  
0.172, 5.537e-5  
0.171, 5.556e-5  
0.170, 5.564e-5  
0.169, 5.577e-5  
0.168, 5.591e-5  
0.167, 5.608e-5  
0.166, 5.610e-5  
0.165, 5.630e-5  
0.164, 5.643e-5  
0.163, 5.655e-5  
0.162, 5.673e-5  
0.161, 5.687e-5  
0.160, 5.718e-5  
0.159, 5.719e-5  
0.158, 5.726e-5  
0.157, 5.763e-5  
0.156, 5.765e-5  
0.155, 5.776e-5  
0.154, 5.778e-5  
0.153, 5.788e-5  
0.152, 5.803e-5  
0.151, 5.857e-5  
0.150, 5.851e-5  
0.149, 5.850e-5  
0.148, 5.856e-5  
0.147, 5.872e-5  
0.146, 5.914e-5  
0.145, 5.932e-5  
0.144, 5.935e-5  
0.143, 5.935e-5  
0.142, 5.952e-5  
0.141, 5.961e-5  
0.140, 5.990e-5  
0.139, 6.013e-5  
0.138, 6.017e-5  
0.137, 6.029e-5  
0.136, 6.048e-5

0.135, 6.075e-5  
0.134, 6.092e-5  
0.133, 6.100e-5  
0.132, 6.126e-5  
0.131, 6.126e-5  
0.130, 6.142e-5  
0.129, 6.172e-5  
0.128, 6.180e-5  
0.127, 6.193e-5  
0.126, 6.219e-5  
0.125, 6.229e-5  
0.124, 6.273e-5  
0.123, 6.293e-5  
0.122, 6.302e-5  
0.121, 6.336e-5  
0.120, 6.329e-5  
0.119, 6.348e-5  
0.118, 6.367e-5  
0.117, 6.388e-5  
0.116, 6.418e-5  
0.115, 6.446e-5  
0.114, 6.458e-5  
0.113, 6.477e-5  
0.112, 6.493e-5  
0.111, 6.507e-5  
0.110, 6.521e-5  
0.109, 6.557e-5  
0.108, 6.575e-5  
0.107, 6.600e-5  
0.106, 6.620e-5  
0.105, 6.663e-5  
0.104, 6.683e-5  
0.103, 6.712e-5  
0.102, 6.742e-5  
0.101, 6.770e-5  
0.100, 6.793e-5  
0.099, 6.831e-5  
0.098, 6.858e-5  
0.097, 6.887e-5  
0.096, 6.902e-5  
0.095, 6.928e-5  
0.094, 6.965e-5  
0.093, 7.001e-5  
0.092, 7.048e-5  
0.091, 7.066e-5  
0.090, 7.108e-5  
0.089, 7.132e-5  
0.088, 7.155e-5  
0.087, 7.167e-5  
0.086, 7.203e-5

0.085, 7.234e-5  
0.084, 7.279e-5  
0.083, 7.319e-5  
0.082, 7.330e-5  
0.081, 7.349e-5  
0.080, 7.384e-5  
0.079, 7.438e-5  
0.078, 7.497e-5  
0.077, 7.526e-5  
0.076, 7.547e-5  
0.075, 7.557e-5  
0.074, 7.598e-5  
0.073, 7.630e-5  
0.072, 7.674e-5  
0.071, 7.698e-5  
0.070, 7.724e-5  
0.069, 7.756e-5  
0.068, 7.780e-5  
0.067, 7.820e-5  
0.066, 7.851e-5  
0.065, 7.876e-5  
0.064, 7.919e-5  
0.063, 7.956e-5  
0.062, 7.989e-5  
0.061, 8.013e-5  
0.060, 8.054e-5  
0.059, 8.091e-5  
0.058, 8.139e-5  
0.057, 8.201e-5  
0.056, 8.217e-5  
0.055, 8.238e-5  
0.054, 8.299e-5  
0.053, 8.342e-5  
0.052, 8.361e-5  
0.051, 8.387e-5  
0.050, 8.437e-5  
0.049, 8.507e-5  
0.048, 8.515e-5  
0.047, 8.541e-5  
0.046, 8.602e-5  
0.045, 8.635e-5  
0.044, 8.659e-5  
0.043, 8.685e-5  
0.042, 8.715e-5  
0.041, 8.739e-5  
0.040, 8.769e-5  
0.039, 8.819e-5  
0.038, 8.871e-5  
0.037, 8.890e-5  
0.036, 8.936e-5

0.035, 8.983e-5  
0.034, 9.018e-5  
0.033, 9.043e-5  
0.032, 9.078e-5  
0.031, 9.104e-5  
0.030, 9.133e-5  
0.029, 9.152e-5  
0.028, 9.206e-5  
0.027, 9.225e-5  
0.026, 9.252e-5  
0.025, 9.272e-5  
0.024, 9.308e-5  
0.023, 9.338e-5  
0.022, 9.366e-5  
0.021, 9.394e-5  
0.020, 9.421e-5  
0.019, 9.466e-5  
0.018, 9.519e-5  
0.017, 9.542e-5  
0.016, 9.577e-5  
0.015, 9.590e-5  
0.014, 9.619e-5  
0.013, 9.653e-5  
0.012, 9.680e-5  
0.011, 9.701e-5  
0.010, 9.716e-5  
0.009, 9.760e-5  
0.008, 9.796e-5  
0.007, 9.812e-5  
0.006, 9.828e-5  
0.005, 9.836e-5  
0.004, 9.870e-5  
0.003, 9.897e-5  
0.002, 9.924e-5  
0.001, 9.953e-5  
0.000, 1.001e-4  
-0.001, 1.003e-4  
-0.002, 1.005e-4  
-0.003, 1.009e-4  
-0.004, 1.012e-4  
-0.005, 1.013e-4  
-0.006, 1.015e-4  
-0.007, 1.016e-4  
-0.008, 1.018e-4  
-0.009, 1.021e-4  
-0.010, 1.024e-4  
-0.011, 1.026e-4  
-0.012, 1.029e-4  
-0.013, 1.032e-4  
-0.014, 1.034e-4

-0.015, 1.035e-4  
-0.016, 1.038e-4  
-0.017, 1.041e-4  
-0.018, 1.044e-4  
-0.019, 1.046e-4  
-0.020, 1.048e-4  
-0.021, 1.050e-4  
-0.022, 1.054e-4  
-0.023, 1.056e-4  
-0.024, 1.058e-4  
-0.025, 1.059e-4  
-0.026, 1.063e-4  
-0.027, 1.065e-4  
-0.028, 1.069e-4  
-0.029, 1.069e-4  
-0.030, 1.069e-4  
-0.031, 1.070e-4  
-0.032, 1.073e-4  
-0.033, 1.078e-4  
-0.034, 1.079e-4  
-0.035, 1.080e-4  
-0.036, 1.081e-4  
-0.037, 1.084e-4  
-0.038, 1.085e-4  
-0.039, 1.089e-4  
-0.040, 1.091e-4  
-0.041, 1.094e-4  
-0.042, 1.095e-4  
-0.043, 1.096e-4  
-0.044, 1.098e-4  
-0.045, 1.100e-4  
-0.046, 1.103e-4  
-0.047, 1.103e-4  
-0.048, 1.106e-4  
-0.049, 1.107e-4  
-0.050, 1.108e-4  
-0.051, 1.112e-4  
-0.052, 1.114e-4  
-0.053, 1.116e-4  
-0.054, 1.117e-4  
-0.055, 1.120e-4  
-0.056, 1.121e-4  
-0.057, 1.123e-4  
-0.058, 1.126e-4  
-0.059, 1.125e-4  
-0.060, 1.127e-4  
-0.061, 1.130e-4  
-0.062, 1.132e-4  
-0.063, 1.134e-4  
-0.064, 1.135e-4



-0.065, 1.136e-4  
-0.066, 1.138e-4  
-0.067, 1.139e-4  
-0.068, 1.141e-4  
-0.069, 1.142e-4  
-0.070, 1.143e-4  
-0.071, 1.145e-4  
-0.072, 1.146e-4  
-0.073, 1.149e-4  
-0.074, 1.151e-4  
-0.075, 1.154e-4  
-0.076, 1.155e-4  
-0.077, 1.158e-4  
-0.078, 1.158e-4  
-0.079, 1.159e-4  
-0.080, 1.159e-4  
-0.081, 1.162e-4  
-0.082, 1.164e-4  
-0.083, 1.166e-4  
-0.084, 1.166e-4  
-0.085, 1.167e-4  
-0.086, 1.171e-4  
-0.087, 1.171e-4  
-0.088, 1.171e-4  
-0.089, 1.171e-4  
-0.090, 1.172e-4  
-0.091, 1.174e-4  
-0.092, 1.174e-4  
-0.093, 1.175e-4  
-0.094, 1.176e-4  
-0.095, 1.177e-4  
-0.096, 1.178e-4  
-0.097, 1.182e-4  
-0.098, 1.182e-4  
-0.099, 1.184e-4  
-0.100, 1.184e-4  
-0.101, 1.187e-4  
-0.102, 1.187e-4  
-0.103, 1.188e-4  
-0.104, 1.191e-4  
-0.105, 1.196e-4  
-0.106, 1.196e-4  
-0.107, 1.196e-4  
-0.108, 1.197e-4  
-0.109, 1.197e-4  
-0.110, 1.198e-4  
-0.111, 1.201e-4  
-0.112, 1.203e-4  
-0.113, 1.205e-4  
-0.114, 1.205e-4

-0.115, 1.203e-4  
-0.116, 1.204e-4  
-0.117, 1.207e-4  
-0.118, 1.208e-4  
-0.119, 1.208e-4  
-0.120, 1.207e-4  
-0.121, 1.209e-4  
-0.122, 1.209e-4  
-0.123, 1.211e-4  
-0.124, 1.212e-4  
-0.125, 1.213e-4  
-0.126, 1.216e-4  
-0.127, 1.220e-4  
-0.128, 1.220e-4  
-0.129, 1.218e-4  
-0.130, 1.219e-4  
-0.131, 1.221e-4  
-0.132, 1.222e-4  
-0.133, 1.224e-4  
-0.134, 1.224e-4  
-0.135, 1.224e-4  
-0.136, 1.227e-4  
-0.137, 1.230e-4  
-0.138, 1.230e-4  
-0.139, 1.230e-4  
-0.140, 1.229e-4  
-0.141, 1.229e-4  
-0.142, 1.230e-4  
-0.143, 1.232e-4  
-0.144, 1.234e-4  
-0.145, 1.234e-4  
-0.146, 1.236e-4  
-0.147, 1.238e-4  
-0.148, 1.240e-4  
-0.149, 1.241e-4  
-0.150, 1.240e-4  
-0.151, 1.242e-4  
-0.152, 1.244e-4  
-0.153, 1.247e-4  
-0.154, 1.245e-4  
-0.155, 1.248e-4  
-0.156, 1.250e-4  
-0.157, 1.251e-4  
-0.158, 1.251e-4  
-0.159, 1.252e-4  
-0.160, 1.251e-4  
-0.161, 1.250e-4  
-0.162, 1.253e-4  
-0.163, 1.253e-4  
-0.164, 1.253e-4

-0.165, 1.254e-4  
-0.166, 1.254e-4  
-0.167, 1.255e-4  
-0.168, 1.256e-4  
-0.169, 1.257e-4  
-0.170, 1.258e-4  
-0.171, 1.257e-4  
-0.172, 1.258e-4  
-0.173, 1.261e-4  
-0.174, 1.261e-4  
-0.175, 1.261e-4  
-0.176, 1.263e-4  
-0.177, 1.263e-4  
-0.178, 1.265e-4  
-0.179, 1.266e-4  
-0.180, 1.268e-4  
-0.181, 1.266e-4  
-0.182, 1.266e-4  
-0.183, 1.267e-4  
-0.184, 1.269e-4  
-0.185, 1.269e-4  
-0.186, 1.270e-4  
-0.187, 1.270e-4  
-0.188, 1.271e-4  
-0.189, 1.271e-4  
-0.190, 1.273e-4  
-0.191, 1.275e-4  
-0.192, 1.279e-4  
-0.193, 1.281e-4  
-0.194, 1.281e-4  
-0.195, 1.281e-4  
-0.196, 1.281e-4  
-0.197, 1.280e-4  
-0.198, 1.280e-4  
-0.199, 1.280e-4  
-0.200, 1.281e-4  
-0.201, 1.283e-4  
-0.202, 1.285e-4  
-0.203, 1.284e-4  
-0.204, 1.288e-4  
-0.205, 1.287e-4  
-0.206, 1.289e-4  
-0.207, 1.290e-4  
-0.208, 1.288e-4  
-0.209, 1.288e-4  
-0.210, 1.290e-4  
-0.211, 1.293e-4  
-0.212, 1.292e-4  
-0.213, 1.292e-4  
-0.214, 1.292e-4

-0.215, 1.293e-4  
-0.216, 1.294e-4  
-0.217, 1.295e-4  
-0.218, 1.295e-4  
-0.219, 1.294e-4  
-0.220, 1.296e-4  
-0.221, 1.297e-4  
-0.222, 1.298e-4  
-0.223, 1.300e-4  
-0.224, 1.299e-4  
-0.225, 1.300e-4  
-0.226, 1.301e-4  
-0.227, 1.304e-4  
-0.228, 1.304e-4  
-0.229, 1.304e-4  
-0.230, 1.308e-4  
-0.231, 1.309e-4  
-0.232, 1.310e-4  
-0.233, 1.312e-4  
-0.234, 1.312e-4  
-0.235, 1.315e-4  
-0.236, 1.315e-4  
-0.237, 1.317e-4  
-0.238, 1.319e-4  
-0.239, 1.318e-4  
-0.240, 1.320e-4  
-0.241, 1.321e-4  
-0.242, 1.321e-4  
-0.243, 1.321e-4  
-0.244, 1.321e-4  
-0.245, 1.323e-4  
-0.246, 1.325e-4  
-0.247, 1.326e-4  
-0.248, 1.327e-4  
-0.249, 1.326e-4  
-0.250, 1.329e-4  
-0.251, 1.335e-4  
-0.252, 1.336e-4  
-0.253, 1.337e-4  
-0.254, 1.339e-4  
-0.255, 1.340e-4  
-0.256, 1.343e-4  
-0.257, 1.346e-4  
-0.258, 1.346e-4  
-0.259, 1.347e-4  
-0.260, 1.352e-4  
-0.261, 1.356e-4  
-0.262, 1.361e-4  
-0.263, 1.363e-4  
-0.264, 1.364e-4

-0.265, 1.367e-4  
-0.266, 1.370e-4  
-0.267, 1.375e-4  
-0.268, 1.379e-4  
-0.269, 1.381e-4  
-0.270, 1.384e-4  
-0.271, 1.388e-4  
-0.272, 1.394e-4  
-0.273, 1.398e-4  
-0.274, 1.402e-4  
-0.275, 1.410e-4  
-0.276, 1.416e-4  
-0.277, 1.421e-4  
-0.278, 1.430e-4  
-0.279, 1.433e-4  
-0.280, 1.439e-4  
-0.281, 1.447e-4  
-0.282, 1.452e-4  
-0.283, 1.456e-4  
-0.284, 1.462e-4  
-0.285, 1.470e-4  
-0.286, 1.479e-4  
-0.287, 1.487e-4  
-0.288, 1.497e-4  
-0.289, 1.503e-4  
-0.290, 1.512e-4  
-0.291, 1.522e-4  
-0.292, 1.533e-4  
-0.293, 1.544e-4  
-0.294, 1.551e-4  
-0.295, 1.560e-4  
-0.296, 1.571e-4  
-0.297, 1.583e-4  
-0.298, 1.593e-4  
-0.299, 1.599e-4  
-0.300, 1.610e-4  
-0.301, 1.624e-4  
-0.302, 1.635e-4  
-0.303, 1.648e-4  
-0.304, 1.658e-4  
-0.305, 1.672e-4  
-0.306, 1.686e-4  
-0.307, 1.701e-4  
-0.308, 1.713e-4  
-0.309, 1.724e-4  
-0.310, 1.737e-4  
-0.311, 1.755e-4  
-0.312, 1.769e-4  
-0.313, 1.781e-4  
-0.314, 1.788e-4

-0.315, 1.802e-4  
-0.316, 1.816e-4  
-0.317, 1.830e-4  
-0.318, 1.844e-4  
-0.319, 1.856e-4  
-0.320, 1.871e-4  
-0.321, 1.887e-4  
-0.322, 1.902e-4  
-0.323, 1.918e-4  
-0.324, 1.930e-4  
-0.325, 1.945e-4  
-0.326, 1.962e-4  
-0.327, 1.975e-4  
-0.328, 1.987e-4  
-0.329, 1.996e-4  
-0.330, 2.009e-4  
-0.331, 2.025e-4  
-0.332, 2.039e-4  
-0.333, 2.051e-4  
-0.334, 2.060e-4  
-0.335, 2.073e-4  
-0.336, 2.088e-4  
-0.337, 2.102e-4  
-0.338, 2.114e-4  
-0.339, 2.119e-4  
-0.340, 2.132e-4  
-0.341, 2.147e-4  
-0.342, 2.158e-4  
-0.343, 2.170e-4  
-0.344, 2.177e-4  
-0.345, 2.191e-4  
-0.346, 2.205e-4  
-0.347, 2.217e-4  
-0.348, 2.227e-4  
-0.349, 2.232e-4  
-0.350, 2.244e-4  
-0.351, 2.257e-4  
-0.352, 2.268e-4  
-0.353, 2.277e-4  
-0.354, 2.284e-4  
-0.355, 2.295e-4  
-0.356, 2.306e-4  
-0.357, 2.316e-4  
-0.358, 2.324e-4  
-0.359, 2.331e-4  
-0.360, 2.341e-4  
-0.361, 2.351e-4  
-0.362, 2.362e-4  
-0.363, 2.372e-4  
-0.364, 2.378e-4

-0.365, 2.390e-4  
-0.366, 2.401e-4  
-0.367, 2.412e-4  
-0.368, 2.420e-4  
-0.369, 2.424e-4  
-0.370, 2.431e-4  
-0.371, 2.440e-4  
-0.372, 2.451e-4  
-0.373, 2.460e-4  
-0.374, 2.465e-4  
-0.375, 2.474e-4  
-0.376, 2.485e-4  
-0.377, 2.497e-4  
-0.378, 2.503e-4  
-0.379, 2.504e-4  
-0.380, 2.513e-4  
-0.381, 2.522e-4  
-0.382, 2.533e-4  
-0.383, 2.541e-4  
-0.384, 2.543e-4  
-0.385, 2.552e-4  
-0.386, 2.559e-4  
-0.387, 2.566e-4  
-0.388, 2.573e-4  
-0.389, 2.575e-4  
-0.390, 2.582e-4  
-0.391, 2.592e-4  
-0.392, 2.598e-4  
-0.393, 2.604e-4  
-0.394, 2.608e-4  
-0.395, 2.619e-4  
-0.396, 2.627e-4  
-0.397, 2.632e-4  
-0.398, 2.638e-4  
-0.399, 2.638e-4

Mar. 29, 2021 05:09:51

Linear Sweep Voltammetry

File: c:\users\shadji04\desktop\sofia cv\29032021\complex 6 sweep scan under nitrogen ph 2.5\500 rpm.txt

Data Source: Experiment

Instrument Model: CHI650E

Header:

Note: 500 rpm

Init E (V) = 0.8

Final E (V) = -0.4

Scan Rate (V/s) = 0.025

Sample Interval (V) = 0.001

Quiet Time (sec) = 2

Sensitivity (A/V) = 0.01

Potential/V, Current/A

0.800, -4.883e-5  
0.799, -4.845e-5  
0.798, -4.823e-5  
0.797, -4.787e-5  
0.796, -4.755e-5  
0.795, -4.729e-5  
0.794, -4.704e-5  
0.793, -4.676e-5  
0.792, -4.648e-5  
0.791, -4.614e-5  
0.790, -4.591e-5  
0.789, -4.555e-5  
0.788, -4.522e-5  
0.787, -4.496e-5  
0.786, -4.472e-5  
0.785, -4.440e-5  
0.784, -4.416e-5  
0.783, -4.403e-5  
0.782, -4.365e-5  
0.781, -4.339e-5  
0.780, -4.320e-5  
0.779, -4.296e-5  
0.778, -4.274e-5  
0.777, -4.244e-5  
0.776, -4.218e-5  
0.775, -4.195e-5  
0.774, -4.166e-5  
0.773, -4.145e-5  
0.772, -4.113e-5  
0.771, -4.080e-5  
0.770, -4.066e-5  
0.769, -4.043e-5  
0.768, -3.989e-5  
0.767, -3.986e-5  
0.766, -3.964e-5  
0.765, -3.944e-5  
0.764, -3.925e-5  
0.763, -3.877e-5  
0.762, -3.860e-5  
0.761, -3.855e-5  
0.760, -3.834e-5  
0.759, -3.819e-5  
0.758, -3.794e-5  
0.757, -3.765e-5  
0.756, -3.741e-5  
0.755, -3.727e-5  
0.754, -3.712e-5  
0.753, -3.690e-5  
0.752, -3.665e-5  
0.751, -3.629e-5



0.750, -3.604e-5  
0.749, -3.593e-5  
0.748, -3.593e-5  
0.747, -3.571e-5  
0.746, -3.544e-5  
0.745, -3.523e-5  
0.744, -3.489e-5  
0.743, -3.481e-5  
0.742, -3.466e-5  
0.741, -3.448e-5  
0.740, -3.418e-5  
0.739, -3.415e-5  
0.738, -3.387e-5  
0.737, -3.368e-5  
0.736, -3.348e-5  
0.735, -3.324e-5  
0.734, -3.303e-5  
0.733, -3.281e-5  
0.732, -3.269e-5  
0.731, -3.251e-5  
0.730, -3.238e-5  
0.729, -3.213e-5  
0.728, -3.167e-5  
0.727, -3.165e-5  
0.726, -3.141e-5  
0.725, -3.137e-5  
0.724, -3.115e-5  
0.723, -3.076e-5  
0.722, -3.051e-5  
0.721, -3.047e-5  
0.720, -3.040e-5  
0.719, -3.023e-5  
0.718, -2.991e-5  
0.717, -2.974e-5  
0.716, -2.978e-5  
0.715, -2.977e-5  
0.714, -2.961e-5  
0.713, -2.941e-5  
0.712, -2.929e-5  
0.711, -2.905e-5  
0.710, -2.883e-5  
0.709, -2.880e-5  
0.708, -2.860e-5  
0.707, -2.840e-5  
0.706, -2.797e-5  
0.705, -2.797e-5  
0.704, -2.776e-5  
0.703, -2.776e-5  
0.702, -2.755e-5  
0.701, -2.747e-5

0.700, -2.744e-5  
0.699, -2.732e-5  
0.698, -2.709e-5  
0.697, -2.684e-5  
0.696, -2.655e-5  
0.695, -2.650e-5  
0.694, -2.642e-5  
0.693, -2.641e-5  
0.692, -2.624e-5  
0.691, -2.613e-5  
0.690, -2.594e-5  
0.689, -2.556e-5  
0.688, -2.558e-5  
0.687, -2.539e-5  
0.686, -2.524e-5  
0.685, -2.507e-5  
0.684, -2.491e-5  
0.683, -2.489e-5  
0.682, -2.468e-5  
0.681, -2.470e-5  
0.680, -2.465e-5  
0.679, -2.420e-5  
0.678, -2.414e-5  
0.677, -2.428e-5  
0.676, -2.416e-5  
0.675, -2.391e-5  
0.674, -2.387e-5  
0.673, -2.396e-5  
0.672, -2.382e-5  
0.671, -2.368e-5  
0.670, -2.367e-5  
0.669, -2.336e-5  
0.668, -2.328e-5  
0.667, -2.311e-5  
0.666, -2.285e-5  
0.665, -2.292e-5  
0.664, -2.284e-5  
0.663, -2.271e-5  
0.662, -2.277e-5  
0.661, -2.276e-5  
0.660, -2.257e-5  
0.659, -2.246e-5  
0.658, -2.263e-5  
0.657, -2.245e-5  
0.656, -2.240e-5  
0.655, -2.239e-5  
0.654, -2.205e-5  
0.653, -2.185e-5  
0.652, -2.188e-5  
0.651, -2.185e-5

0.650, -2.165e-5  
0.649, -2.158e-5  
0.648, -2.134e-5  
0.647, -2.141e-5  
0.646, -2.125e-5  
0.645, -2.105e-5  
0.644, -2.100e-5  
0.643, -2.096e-5  
0.642, -2.090e-5  
0.641, -2.085e-5  
0.640, -2.080e-5  
0.639, -2.065e-5  
0.638, -2.071e-5  
0.637, -2.067e-5  
0.636, -2.018e-5  
0.635, -2.018e-5  
0.634, -2.034e-5  
0.633, -2.032e-5  
0.632, -2.025e-5  
0.631, -2.025e-5  
0.630, -2.012e-5  
0.629, -2.013e-5  
0.628, -1.992e-5  
0.627, -1.980e-5  
0.626, -1.977e-5  
0.625, -1.967e-5  
0.624, -1.964e-5  
0.623, -1.949e-5  
0.622, -1.942e-5  
0.621, -1.920e-5  
0.620, -1.888e-5  
0.619, -1.885e-5  
0.618, -1.881e-5  
0.617, -1.889e-5  
0.616, -1.871e-5  
0.615, -1.871e-5  
0.614, -1.856e-5  
0.613, -1.855e-5  
0.612, -1.857e-5  
0.611, -1.854e-5  
0.610, -1.848e-5  
0.609, -1.843e-5  
0.608, -1.840e-5  
0.607, -1.829e-5  
0.606, -1.812e-5  
0.605, -1.792e-5  
0.604, -1.758e-5  
0.603, -1.769e-5  
0.602, -1.758e-5  
0.601, -1.764e-5

0.600, -1.764e-5  
0.599, -1.742e-5  
0.598, -1.757e-5  
0.597, -1.760e-5  
0.596, -1.735e-5  
0.595, -1.722e-5  
0.594, -1.708e-5  
0.593, -1.714e-5  
0.592, -1.716e-5  
0.591, -1.703e-5  
0.590, -1.697e-5  
0.589, -1.670e-5  
0.588, -1.665e-5  
0.587, -1.667e-5  
0.586, -1.660e-5  
0.585, -1.656e-5  
0.584, -1.651e-5  
0.583, -1.638e-5  
0.582, -1.605e-5  
0.581, -1.608e-5  
0.580, -1.619e-5  
0.579, -1.606e-5  
0.578, -1.589e-5  
0.577, -1.568e-5  
0.576, -1.554e-5  
0.575, -1.555e-5  
0.574, -1.571e-5  
0.573, -1.553e-5  
0.572, -1.535e-5  
0.571, -1.521e-5  
0.570, -1.515e-5  
0.569, -1.511e-5  
0.568, -1.501e-5  
0.567, -1.501e-5  
0.566, -1.473e-5  
0.565, -1.469e-5  
0.564, -1.458e-5  
0.563, -1.447e-5  
0.562, -1.442e-5  
0.561, -1.427e-5  
0.560, -1.414e-5  
0.559, -1.396e-5  
0.558, -1.398e-5  
0.557, -1.404e-5  
0.556, -1.397e-5  
0.555, -1.381e-5  
0.554, -1.374e-5  
0.553, -1.351e-5  
0.552, -1.351e-5  
0.551, -1.315e-5

0.550, -1.295e-5  
0.549, -1.292e-5  
0.548, -1.278e-5  
0.547, -1.281e-5  
0.546, -1.267e-5  
0.545, -1.273e-5  
0.544, -1.262e-5  
0.543, -1.213e-5  
0.542, -1.214e-5  
0.541, -1.219e-5  
0.540, -1.199e-5  
0.539, -1.178e-5  
0.538, -1.175e-5  
0.537, -1.156e-5  
0.536, -1.154e-5  
0.535, -1.140e-5  
0.534, -1.094e-5  
0.533, -1.108e-5  
0.532, -1.104e-5  
0.531, -1.096e-5  
0.530, -1.082e-5  
0.529, -1.066e-5  
0.528, -1.048e-5  
0.527, -1.027e-5  
0.526, -1.011e-5  
0.525, -9.899e-6  
0.524, -9.751e-6  
0.523, -9.584e-6  
0.522, -9.339e-6  
0.521, -9.093e-6  
0.520, -9.054e-6  
0.519, -8.848e-6  
0.518, -8.681e-6  
0.517, -8.523e-6  
0.516, -8.258e-6  
0.515, -8.052e-6  
0.514, -7.855e-6  
0.513, -7.620e-6  
0.512, -7.443e-6  
0.511, -7.227e-6  
0.510, -6.834e-6  
0.509, -6.559e-6  
0.508, -6.362e-6  
0.507, -6.293e-6  
0.506, -6.038e-6  
0.505, -5.851e-6  
0.504, -5.674e-6  
0.503, -5.252e-6  
0.502, -4.800e-6  
0.501, -4.771e-6

0.500, -4.643e-6  
0.499, -4.476e-6  
0.498, -4.250e-6  
0.497, -3.759e-6  
0.496, -3.464e-6  
0.495, -3.120e-6  
0.494, -2.963e-6  
0.493, -2.796e-6  
0.492, -2.629e-6  
0.491, -2.413e-6  
0.490, -2.197e-6  
0.489, -1.882e-6  
0.488, -1.489e-6  
0.487, -1.312e-6  
0.486, -1.028e-6  
0.485, -6.936e-7  
0.484, -2.515e-7  
0.483, -8.449e-8  
0.482, 9.234e-8  
0.481, 2.986e-7  
0.480, 6.327e-7  
0.479, 1.085e-6  
0.478, 1.330e-6  
0.477, 1.870e-6  
0.476, 2.175e-6  
0.475, 2.539e-6  
0.474, 3.040e-6  
0.473, 3.275e-6  
0.472, 3.521e-6  
0.471, 3.727e-6  
0.470, 4.140e-6  
0.469, 4.494e-6  
0.468, 4.926e-6  
0.467, 5.122e-6  
0.466, 5.329e-6  
0.465, 5.702e-6  
0.464, 6.075e-6  
0.463, 6.419e-6  
0.462, 6.802e-6  
0.461, 7.136e-6  
0.460, 7.529e-6  
0.459, 7.922e-6  
0.458, 8.207e-6  
0.457, 8.433e-6  
0.456, 8.796e-6  
0.455, 9.199e-6  
0.454, 9.455e-6  
0.453, 9.907e-6  
0.452, 1.037e-5  
0.451, 1.082e-5

0.450, 1.136e-5  
0.449, 1.149e-5  
0.448, 1.173e-5  
0.447, 1.222e-5  
0.446, 1.250e-5  
0.445, 1.268e-5  
0.444, 1.293e-5  
0.443, 1.316e-5  
0.442, 1.346e-5  
0.441, 1.407e-5  
0.440, 1.432e-5  
0.439, 1.444e-5  
0.438, 1.464e-5  
0.437, 1.503e-5  
0.436, 1.527e-5  
0.435, 1.560e-5  
0.434, 1.591e-5  
0.433, 1.612e-5  
0.432, 1.647e-5  
0.431, 1.679e-5  
0.430, 1.710e-5  
0.429, 1.735e-5  
0.428, 1.776e-5  
0.427, 1.807e-5  
0.426, 1.843e-5  
0.425, 1.853e-5  
0.424, 1.879e-5  
0.423, 1.937e-5  
0.422, 1.962e-5  
0.421, 1.971e-5  
0.420, 2.001e-5  
0.419, 2.018e-5  
0.418, 2.041e-5  
0.417, 2.070e-5  
0.416, 2.101e-5  
0.415, 2.123e-5  
0.414, 2.186e-5  
0.413, 2.204e-5  
0.412, 2.204e-5  
0.411, 2.232e-5  
0.410, 2.262e-5  
0.409, 2.288e-5  
0.408, 2.329e-5  
0.407, 2.358e-5  
0.406, 2.370e-5  
0.405, 2.395e-5  
0.404, 2.416e-5  
0.403, 2.444e-5  
0.402, 2.465e-5  
0.401, 2.497e-5

0.400, 2.519e-5  
0.399, 2.551e-5  
0.398, 2.558e-5  
0.397, 2.592e-5  
0.396, 2.615e-5  
0.395, 2.626e-5  
0.394, 2.644e-5  
0.393, 2.663e-5  
0.392, 2.704e-5  
0.391, 2.741e-5  
0.390, 2.749e-5  
0.389, 2.769e-5  
0.388, 2.815e-5  
0.387, 2.827e-5  
0.386, 2.848e-5  
0.385, 2.849e-5  
0.384, 2.892e-5  
0.383, 2.914e-5  
0.382, 2.929e-5  
0.381, 2.943e-5  
0.380, 2.966e-5  
0.379, 2.989e-5  
0.378, 3.020e-5  
0.377, 3.048e-5  
0.376, 3.075e-5  
0.375, 3.085e-5  
0.374, 3.100e-5  
0.373, 3.125e-5  
0.372, 3.153e-5  
0.371, 3.186e-5  
0.370, 3.227e-5  
0.369, 3.241e-5  
0.368, 3.261e-5  
0.367, 3.274e-5  
0.366, 3.300e-5  
0.365, 3.324e-5  
0.364, 3.366e-5  
0.363, 3.388e-5  
0.362, 3.411e-5  
0.361, 3.422e-5  
0.360, 3.448e-5  
0.359, 3.467e-5  
0.358, 3.491e-5  
0.357, 3.528e-5  
0.356, 3.553e-5  
0.355, 3.573e-5  
0.354, 3.591e-5  
0.353, 3.630e-5  
0.352, 3.667e-5  
0.351, 3.688e-5



0.350, 3.691e-5  
0.349, 3.708e-5  
0.348, 3.737e-5  
0.347, 3.783e-5  
0.346, 3.811e-5  
0.345, 3.824e-5  
0.344, 3.857e-5  
0.343, 3.855e-5  
0.342, 3.886e-5  
0.341, 3.915e-5  
0.340, 3.936e-5  
0.339, 3.949e-5  
0.338, 3.969e-5  
0.337, 4.020e-5  
0.336, 4.055e-5  
0.335, 4.078e-5  
0.334, 4.112e-5  
0.333, 4.120e-5  
0.332, 4.127e-5  
0.331, 4.148e-5  
0.330, 4.177e-5  
0.329, 4.208e-5  
0.328, 4.237e-5  
0.327, 4.255e-5  
0.326, 4.282e-5  
0.325, 4.305e-5  
0.324, 4.325e-5  
0.323, 4.339e-5  
0.322, 4.361e-5  
0.321, 4.382e-5  
0.320, 4.422e-5  
0.319, 4.454e-5  
0.318, 4.471e-5  
0.317, 4.480e-5  
0.316, 4.500e-5  
0.315, 4.523e-5  
0.314, 4.554e-5  
0.313, 4.591e-5  
0.312, 4.644e-5  
0.311, 4.662e-5  
0.310, 4.678e-5  
0.309, 4.679e-5  
0.308, 4.701e-5  
0.307, 4.721e-5  
0.306, 4.757e-5  
0.305, 4.784e-5  
0.304, 4.792e-5  
0.303, 4.828e-5  
0.302, 4.854e-5  
0.301, 4.855e-5

0.300, 4.886e-5  
0.299, 4.905e-5  
0.298, 4.946e-5  
0.297, 4.969e-5  
0.296, 4.965e-5  
0.295, 4.988e-5  
0.294, 4.993e-5  
0.293, 5.022e-5  
0.292, 5.043e-5  
0.291, 5.055e-5  
0.290, 5.074e-5  
0.289, 5.090e-5  
0.288, 5.101e-5  
0.287, 5.121e-5  
0.286, 5.146e-5  
0.285, 5.174e-5  
0.284, 5.179e-5  
0.283, 5.192e-5  
0.282, 5.216e-5  
0.281, 5.235e-5  
0.280, 5.247e-5  
0.279, 5.263e-5  
0.278, 5.277e-5  
0.277, 5.293e-5  
0.276, 5.321e-5  
0.275, 5.337e-5  
0.274, 5.340e-5  
0.273, 5.364e-5  
0.272, 5.376e-5  
0.271, 5.394e-5  
0.270, 5.436e-5  
0.269, 5.448e-5  
0.268, 5.455e-5  
0.267, 5.484e-5  
0.266, 5.516e-5  
0.265, 5.525e-5  
0.264, 5.532e-5  
0.263, 5.546e-5  
0.262, 5.541e-5  
0.261, 5.581e-5  
0.260, 5.578e-5  
0.259, 5.578e-5  
0.258, 5.595e-5  
0.257, 5.608e-5  
0.256, 5.623e-5  
0.255, 5.639e-5  
0.254, 5.653e-5  
0.253, 5.667e-5  
0.252, 5.681e-5  
0.251, 5.697e-5

0.250, 5.714e-5  
0.249, 5.731e-5  
0.248, 5.748e-5  
0.247, 5.795e-5  
0.246, 5.797e-5  
0.245, 5.825e-5  
0.244, 5.846e-5  
0.243, 5.849e-5  
0.242, 5.866e-5  
0.241, 5.865e-5  
0.240, 5.872e-5  
0.239, 5.884e-5  
0.238, 5.892e-5  
0.237, 5.908e-5  
0.236, 5.933e-5  
0.235, 5.939e-5  
0.234, 5.968e-5  
0.233, 5.976e-5  
0.232, 5.970e-5  
0.231, 5.991e-5  
0.230, 6.032e-5  
0.229, 6.025e-5  
0.228, 6.026e-5  
0.227, 6.067e-5  
0.226, 6.062e-5  
0.225, 6.070e-5  
0.224, 6.098e-5  
0.223, 6.118e-5  
0.222, 6.135e-5  
0.221, 6.139e-5  
0.220, 6.148e-5  
0.219, 6.151e-5  
0.218, 6.157e-5  
0.217, 6.171e-5  
0.216, 6.191e-5  
0.215, 6.213e-5  
0.214, 6.224e-5  
0.213, 6.230e-5  
0.212, 6.240e-5  
0.211, 6.246e-5  
0.210, 6.268e-5  
0.209, 6.295e-5  
0.208, 6.308e-5  
0.207, 6.334e-5  
0.206, 6.360e-5  
0.205, 6.375e-5  
0.204, 6.385e-5  
0.203, 6.378e-5  
0.202, 6.399e-5  
0.201, 6.409e-5

0.200, 6.413e-5  
0.199, 6.439e-5  
0.198, 6.447e-5  
0.197, 6.468e-5  
0.196, 6.509e-5  
0.195, 6.525e-5  
0.194, 6.517e-5  
0.193, 6.512e-5  
0.192, 6.520e-5  
0.191, 6.536e-5  
0.190, 6.552e-5  
0.189, 6.578e-5  
0.188, 6.580e-5  
0.187, 6.582e-5  
0.186, 6.609e-5  
0.185, 6.606e-5  
0.184, 6.617e-5  
0.183, 6.622e-5  
0.182, 6.647e-5  
0.181, 6.670e-5  
0.180, 6.695e-5  
0.179, 6.705e-5  
0.178, 6.728e-5  
0.177, 6.748e-5  
0.176, 6.762e-5  
0.175, 6.777e-5  
0.174, 6.789e-5  
0.173, 6.819e-5  
0.172, 6.819e-5  
0.171, 6.835e-5  
0.170, 6.865e-5  
0.169, 6.861e-5  
0.168, 6.897e-5  
0.167, 6.927e-5  
0.166, 6.925e-5  
0.165, 6.920e-5  
0.164, 6.941e-5  
0.163, 6.949e-5  
0.162, 6.965e-5  
0.161, 6.969e-5  
0.160, 6.983e-5  
0.159, 7.016e-5  
0.158, 7.036e-5  
0.157, 7.047e-5  
0.156, 7.070e-5  
0.155, 7.085e-5  
0.154, 7.103e-5  
0.153, 7.131e-5  
0.152, 7.151e-5  
0.151, 7.172e-5

0.150, 7.180e-5  
0.149, 7.211e-5  
0.148, 7.227e-5  
0.147, 7.242e-5  
0.146, 7.257e-5  
0.145, 7.277e-5  
0.144, 7.293e-5  
0.143, 7.326e-5  
0.142, 7.345e-5  
0.141, 7.365e-5  
0.140, 7.373e-5  
0.139, 7.381e-5  
0.138, 7.397e-5  
0.137, 7.427e-5  
0.136, 7.438e-5  
0.135, 7.472e-5  
0.134, 7.484e-5  
0.133, 7.521e-5  
0.132, 7.543e-5  
0.131, 7.570e-5  
0.130, 7.616e-5  
0.129, 7.617e-5  
0.128, 7.619e-5  
0.127, 7.645e-5  
0.126, 7.673e-5  
0.125, 7.687e-5  
0.124, 7.690e-5  
0.123, 7.713e-5  
0.122, 7.748e-5  
0.121, 7.757e-5  
0.120, 7.779e-5  
0.119, 7.810e-5  
0.118, 7.861e-5  
0.117, 7.863e-5  
0.116, 7.886e-5  
0.115, 7.902e-5  
0.114, 7.929e-5  
0.113, 7.936e-5  
0.112, 7.962e-5  
0.111, 7.990e-5  
0.110, 8.016e-5  
0.109, 8.041e-5  
0.108, 8.068e-5  
0.107, 8.109e-5  
0.106, 8.129e-5  
0.105, 8.166e-5  
0.104, 8.196e-5  
0.103, 8.214e-5  
0.102, 8.250e-5  
0.101, 8.291e-5

0.100, 8.331e-5  
0.099, 8.337e-5  
0.098, 8.356e-5  
0.097, 8.395e-5  
0.096, 8.432e-5  
0.095, 8.436e-5  
0.094, 8.472e-5  
0.093, 8.527e-5  
0.092, 8.529e-5  
0.091, 8.577e-5  
0.090, 8.591e-5  
0.089, 8.621e-5  
0.088, 8.670e-5  
0.087, 8.696e-5  
0.086, 8.724e-5  
0.085, 8.767e-5  
0.084, 8.801e-5  
0.083, 8.836e-5  
0.082, 8.853e-5  
0.081, 8.888e-5  
0.080, 8.921e-5  
0.079, 8.974e-5  
0.078, 9.014e-5  
0.077, 9.055e-5  
0.076, 9.066e-5  
0.075, 9.086e-5  
0.074, 9.117e-5  
0.073, 9.145e-5  
0.072, 9.185e-5  
0.071, 9.217e-5  
0.070, 9.263e-5  
0.069, 9.309e-5  
0.068, 9.339e-5  
0.067, 9.381e-5  
0.066, 9.411e-5  
0.065, 9.470e-5  
0.064, 9.518e-5  
0.063, 9.551e-5  
0.062, 9.601e-5  
0.061, 9.625e-5  
0.060, 9.665e-5  
0.059, 9.721e-5  
0.058, 9.758e-5  
0.057, 9.800e-5  
0.056, 9.834e-5  
0.055, 9.851e-5  
0.054, 9.881e-5  
0.053, 9.932e-5  
0.052, 9.981e-5  
0.051, 1.002e-4

0.050, 1.005e-4  
0.049, 1.010e-4  
0.048, 1.016e-4  
0.047, 1.019e-4  
0.046, 1.021e-4  
0.045, 1.025e-4  
0.044, 1.029e-4  
0.043, 1.036e-4  
0.042, 1.039e-4  
0.041, 1.041e-4  
0.040, 1.044e-4  
0.039, 1.052e-4  
0.038, 1.055e-4  
0.037, 1.060e-4  
0.036, 1.063e-4  
0.035, 1.069e-4  
0.034, 1.074e-4  
0.033, 1.078e-4  
0.032, 1.080e-4  
0.031, 1.084e-4  
0.030, 1.089e-4  
0.029, 1.094e-4  
0.028, 1.097e-4  
0.027, 1.101e-4  
0.026, 1.107e-4  
0.025, 1.112e-4  
0.024, 1.115e-4  
0.023, 1.119e-4  
0.022, 1.124e-4  
0.021, 1.129e-4  
0.020, 1.135e-4  
0.019, 1.138e-4  
0.018, 1.142e-4  
0.017, 1.145e-4  
0.016, 1.148e-4  
0.015, 1.153e-4  
0.014, 1.157e-4  
0.013, 1.162e-4  
0.012, 1.167e-4  
0.011, 1.169e-4  
0.010, 1.171e-4  
0.009, 1.175e-4  
0.008, 1.178e-4  
0.007, 1.181e-4  
0.006, 1.185e-4  
0.005, 1.190e-4  
0.004, 1.195e-4  
0.003, 1.199e-4  
0.002, 1.202e-4  
0.001, 1.205e-4

0.000, 1.211e-4  
-0.001, 1.214e-4  
-0.002, 1.217e-4  
-0.003, 1.220e-4  
-0.004, 1.225e-4  
-0.005, 1.229e-4  
-0.006, 1.232e-4  
-0.007, 1.237e-4  
-0.008, 1.242e-4  
-0.009, 1.244e-4  
-0.010, 1.247e-4  
-0.011, 1.249e-4  
-0.012, 1.254e-4  
-0.013, 1.257e-4  
-0.014, 1.258e-4  
-0.015, 1.263e-4  
-0.016, 1.265e-4  
-0.017, 1.270e-4  
-0.018, 1.273e-4  
-0.019, 1.279e-4  
-0.020, 1.280e-4  
-0.021, 1.285e-4  
-0.022, 1.289e-4  
-0.023, 1.293e-4  
-0.024, 1.295e-4  
-0.025, 1.297e-4  
-0.026, 1.303e-4  
-0.027, 1.306e-4  
-0.028, 1.310e-4  
-0.029, 1.314e-4  
-0.030, 1.318e-4  
-0.031, 1.320e-4  
-0.032, 1.322e-4  
-0.033, 1.322e-4  
-0.034, 1.325e-4  
-0.035, 1.329e-4  
-0.036, 1.331e-4  
-0.037, 1.333e-4  
-0.038, 1.337e-4  
-0.039, 1.339e-4  
-0.040, 1.342e-4  
-0.041, 1.346e-4  
-0.042, 1.349e-4  
-0.043, 1.350e-4  
-0.044, 1.353e-4  
-0.045, 1.356e-4  
-0.046, 1.359e-4  
-0.047, 1.363e-4  
-0.048, 1.366e-4  
-0.049, 1.368e-4



-0.050, 1.371e-4  
-0.051, 1.374e-4  
-0.052, 1.377e-4  
-0.053, 1.378e-4  
-0.054, 1.381e-4  
-0.055, 1.384e-4  
-0.056, 1.387e-4  
-0.057, 1.390e-4  
-0.058, 1.391e-4  
-0.059, 1.393e-4  
-0.060, 1.397e-4  
-0.061, 1.398e-4  
-0.062, 1.399e-4  
-0.063, 1.402e-4  
-0.064, 1.403e-4  
-0.065, 1.406e-4  
-0.066, 1.408e-4  
-0.067, 1.410e-4  
-0.068, 1.413e-4  
-0.069, 1.415e-4  
-0.070, 1.416e-4  
-0.071, 1.419e-4  
-0.072, 1.422e-4  
-0.073, 1.426e-4  
-0.074, 1.429e-4  
-0.075, 1.430e-4  
-0.076, 1.432e-4  
-0.077, 1.436e-4  
-0.078, 1.438e-4  
-0.079, 1.441e-4  
-0.080, 1.443e-4  
-0.081, 1.445e-4  
-0.082, 1.445e-4  
-0.083, 1.447e-4  
-0.084, 1.450e-4  
-0.085, 1.450e-4  
-0.086, 1.455e-4  
-0.087, 1.454e-4  
-0.088, 1.455e-4  
-0.089, 1.456e-4  
-0.090, 1.460e-4  
-0.091, 1.461e-4  
-0.092, 1.462e-4  
-0.093, 1.465e-4  
-0.094, 1.470e-4  
-0.095, 1.471e-4  
-0.096, 1.473e-4  
-0.097, 1.474e-4  
-0.098, 1.478e-4  
-0.099, 1.480e-4

-0.100, 1.482e-4  
-0.101, 1.484e-4  
-0.102, 1.487e-4  
-0.103, 1.489e-4  
-0.104, 1.490e-4  
-0.105, 1.492e-4  
-0.106, 1.495e-4  
-0.107, 1.497e-4  
-0.108, 1.500e-4  
-0.109, 1.503e-4  
-0.110, 1.505e-4  
-0.111, 1.507e-4  
-0.112, 1.510e-4  
-0.113, 1.511e-4  
-0.114, 1.512e-4  
-0.115, 1.515e-4  
-0.116, 1.516e-4  
-0.117, 1.516e-4  
-0.118, 1.517e-4  
-0.119, 1.516e-4  
-0.120, 1.519e-4  
-0.121, 1.521e-4  
-0.122, 1.521e-4  
-0.123, 1.523e-4  
-0.124, 1.524e-4  
-0.125, 1.526e-4  
-0.126, 1.528e-4  
-0.127, 1.529e-4  
-0.128, 1.531e-4  
-0.129, 1.534e-4  
-0.130, 1.534e-4  
-0.131, 1.537e-4  
-0.132, 1.539e-4  
-0.133, 1.540e-4  
-0.134, 1.540e-4  
-0.135, 1.541e-4  
-0.136, 1.543e-4  
-0.137, 1.544e-4  
-0.138, 1.547e-4  
-0.139, 1.549e-4  
-0.140, 1.551e-4  
-0.141, 1.552e-4  
-0.142, 1.552e-4  
-0.143, 1.553e-4  
-0.144, 1.556e-4  
-0.145, 1.558e-4  
-0.146, 1.560e-4  
-0.147, 1.562e-4  
-0.148, 1.563e-4  
-0.149, 1.567e-4

-0.150, 1.569e-4  
-0.151, 1.570e-4  
-0.152, 1.571e-4  
-0.153, 1.575e-4  
-0.154, 1.574e-4  
-0.155, 1.575e-4  
-0.156, 1.577e-4  
-0.157, 1.578e-4  
-0.158, 1.580e-4  
-0.159, 1.582e-4  
-0.160, 1.584e-4  
-0.161, 1.583e-4  
-0.162, 1.585e-4  
-0.163, 1.587e-4  
-0.164, 1.589e-4  
-0.165, 1.591e-4  
-0.166, 1.592e-4  
-0.167, 1.593e-4  
-0.168, 1.594e-4  
-0.169, 1.593e-4  
-0.170, 1.593e-4  
-0.171, 1.592e-4  
-0.172, 1.594e-4  
-0.173, 1.598e-4  
-0.174, 1.596e-4  
-0.175, 1.597e-4  
-0.176, 1.598e-4  
-0.177, 1.601e-4  
-0.178, 1.601e-4  
-0.179, 1.603e-4  
-0.180, 1.606e-4  
-0.181, 1.606e-4  
-0.182, 1.608e-4  
-0.183, 1.610e-4  
-0.184, 1.611e-4  
-0.185, 1.612e-4  
-0.186, 1.613e-4  
-0.187, 1.612e-4  
-0.188, 1.613e-4  
-0.189, 1.614e-4  
-0.190, 1.615e-4  
-0.191, 1.620e-4  
-0.192, 1.623e-4  
-0.193, 1.624e-4  
-0.194, 1.624e-4  
-0.195, 1.625e-4  
-0.196, 1.625e-4  
-0.197, 1.627e-4  
-0.198, 1.628e-4  
-0.199, 1.629e-4

-0.200, 1.630e-4  
-0.201, 1.631e-4  
-0.202, 1.632e-4  
-0.203, 1.634e-4  
-0.204, 1.635e-4  
-0.205, 1.634e-4  
-0.206, 1.634e-4  
-0.207, 1.635e-4  
-0.208, 1.635e-4  
-0.209, 1.635e-4  
-0.210, 1.636e-4  
-0.211, 1.637e-4  
-0.212, 1.638e-4  
-0.213, 1.639e-4  
-0.214, 1.641e-4  
-0.215, 1.642e-4  
-0.216, 1.643e-4  
-0.217, 1.643e-4  
-0.218, 1.644e-4  
-0.219, 1.645e-4  
-0.220, 1.646e-4  
-0.221, 1.646e-4  
-0.222, 1.649e-4  
-0.223, 1.650e-4  
-0.224, 1.651e-4  
-0.225, 1.654e-4  
-0.226, 1.655e-4  
-0.227, 1.656e-4  
-0.228, 1.657e-4  
-0.229, 1.659e-4  
-0.230, 1.661e-4  
-0.231, 1.664e-4  
-0.232, 1.666e-4  
-0.233, 1.666e-4  
-0.234, 1.666e-4  
-0.235, 1.665e-4  
-0.236, 1.667e-4  
-0.237, 1.668e-4  
-0.238, 1.668e-4  
-0.239, 1.671e-4  
-0.240, 1.674e-4  
-0.241, 1.676e-4  
-0.242, 1.677e-4  
-0.243, 1.679e-4  
-0.244, 1.680e-4  
-0.245, 1.685e-4  
-0.246, 1.686e-4  
-0.247, 1.685e-4  
-0.248, 1.685e-4  
-0.249, 1.688e-4

-0.250, 1.689e-4  
-0.251, 1.692e-4  
-0.252, 1.694e-4  
-0.253, 1.696e-4  
-0.254, 1.699e-4  
-0.255, 1.702e-4  
-0.256, 1.703e-4  
-0.257, 1.708e-4  
-0.258, 1.709e-4  
-0.259, 1.712e-4  
-0.260, 1.714e-4  
-0.261, 1.716e-4  
-0.262, 1.720e-4  
-0.263, 1.721e-4  
-0.264, 1.723e-4  
-0.265, 1.728e-4  
-0.266, 1.732e-4  
-0.267, 1.735e-4  
-0.268, 1.738e-4  
-0.269, 1.739e-4  
-0.270, 1.743e-4  
-0.271, 1.746e-4  
-0.272, 1.751e-4  
-0.273, 1.755e-4  
-0.274, 1.757e-4  
-0.275, 1.761e-4  
-0.276, 1.765e-4  
-0.277, 1.768e-4  
-0.278, 1.773e-4  
-0.279, 1.777e-4  
-0.280, 1.783e-4  
-0.281, 1.789e-4  
-0.282, 1.795e-4  
-0.283, 1.801e-4  
-0.284, 1.806e-4  
-0.285, 1.814e-4  
-0.286, 1.817e-4  
-0.287, 1.823e-4  
-0.288, 1.832e-4  
-0.289, 1.837e-4  
-0.290, 1.840e-4  
-0.291, 1.846e-4  
-0.292, 1.851e-4  
-0.293, 1.857e-4  
-0.294, 1.866e-4  
-0.295, 1.872e-4  
-0.296, 1.880e-4  
-0.297, 1.888e-4  
-0.298, 1.897e-4  
-0.299, 1.907e-4

-0.300, 1.914e-4  
-0.301, 1.921e-4  
-0.302, 1.929e-4  
-0.303, 1.938e-4  
-0.304, 1.947e-4  
-0.305, 1.957e-4  
-0.306, 1.968e-4  
-0.307, 1.978e-4  
-0.308, 1.986e-4  
-0.309, 1.997e-4  
-0.310, 2.004e-4  
-0.311, 2.012e-4  
-0.312, 2.018e-4  
-0.313, 2.023e-4  
-0.314, 2.032e-4  
-0.315, 2.040e-4  
-0.316, 2.049e-4  
-0.317, 2.060e-4  
-0.318, 2.069e-4  
-0.319, 2.079e-4  
-0.320, 2.088e-4  
-0.321, 2.097e-4  
-0.322, 2.105e-4  
-0.323, 2.114e-4  
-0.324, 2.122e-4  
-0.325, 2.130e-4  
-0.326, 2.139e-4  
-0.327, 2.148e-4  
-0.328, 2.156e-4  
-0.329, 2.166e-4  
-0.330, 2.176e-4  
-0.331, 2.185e-4  
-0.332, 2.196e-4  
-0.333, 2.206e-4  
-0.334, 2.213e-4  
-0.335, 2.220e-4  
-0.336, 2.230e-4  
-0.337, 2.238e-4  
-0.338, 2.246e-4  
-0.339, 2.256e-4  
-0.340, 2.263e-4  
-0.341, 2.271e-4  
-0.342, 2.281e-4  
-0.343, 2.288e-4  
-0.344, 2.296e-4  
-0.345, 2.305e-4  
-0.346, 2.313e-4  
-0.347, 2.323e-4  
-0.348, 2.333e-4  
-0.349, 2.340e-4

-0.350, 2.349e-4  
-0.351, 2.358e-4  
-0.352, 2.368e-4  
-0.353, 2.377e-4  
-0.354, 2.386e-4  
-0.355, 2.391e-4  
-0.356, 2.401e-4  
-0.357, 2.409e-4  
-0.358, 2.414e-4  
-0.359, 2.422e-4  
-0.360, 2.429e-4  
-0.361, 2.436e-4  
-0.362, 2.442e-4  
-0.363, 2.447e-4  
-0.364, 2.453e-4  
-0.365, 2.460e-4  
-0.366, 2.465e-4  
-0.367, 2.471e-4  
-0.368, 2.479e-4  
-0.369, 2.487e-4  
-0.370, 2.494e-4  
-0.371, 2.503e-4  
-0.372, 2.511e-4  
-0.373, 2.517e-4  
-0.374, 2.525e-4  
-0.375, 2.533e-4  
-0.376, 2.537e-4  
-0.377, 2.543e-4  
-0.378, 2.549e-4  
-0.379, 2.555e-4  
-0.380, 2.563e-4  
-0.381, 2.571e-4  
-0.382, 2.576e-4  
-0.383, 2.583e-4  
-0.384, 2.590e-4  
-0.385, 2.594e-4  
-0.386, 2.599e-4  
-0.387, 2.604e-4  
-0.388, 2.608e-4  
-0.389, 2.614e-4  
-0.390, 2.621e-4  
-0.391, 2.630e-4  
-0.392, 2.637e-4  
-0.393, 2.645e-4  
-0.394, 2.651e-4  
-0.395, 2.656e-4  
-0.396, 2.661e-4  
-0.397, 2.665e-4  
-0.398, 2.673e-4  
-0.399, 2.681e-4

Mar. 29, 2021 05:13:25

Linear Sweep Voltammetry

File: c:\users\shadji04\desktop\sofia cv\29032021\complex 6 sweep scan under nitrogen ph 2.5\1000 rpm.txt

Data Source: Experiment

Instrument Model: CHI650E

Header:

Note: 1000 rpm

Init E (V) = 0.8

Final E (V) = -0.4

Scan Rate (V/s) = 0.025

Sample Interval (V) = 0.001

Quiet Time (sec) = 2

Sensitivity (A/V) = 0.01

Potential/V, Current/A

0.800, -5.813e-5

0.799, -5.759e-5

0.798, -5.718e-5

0.797, -5.661e-5

0.796, -5.613e-5

0.795, -5.599e-5

0.794, -5.563e-5

0.793, -5.513e-5

0.792, -5.494e-5

0.791, -5.464e-5

0.790, -5.437e-5

0.789, -5.394e-5

0.788, -5.364e-5

0.787, -5.324e-5

0.786, -5.273e-5

0.785, -5.267e-5

0.784, -5.245e-5

0.783, -5.191e-5

0.782, -5.173e-5

0.781, -5.141e-5

0.780, -5.116e-5

0.779, -5.094e-5

0.778, -5.067e-5

0.777, -5.034e-5

0.776, -4.981e-5

0.775, -4.944e-5

0.774, -4.935e-5

0.773, -4.910e-5

0.772, -4.881e-5

0.771, -4.863e-5

0.770, -4.824e-5

0.769, -4.793e-5

0.768, -4.761e-5

0.767, -4.736e-5

0.766, -4.721e-5



0.765, -4.690e-5  
0.764, -4.659e-5  
0.763, -4.634e-5  
0.762, -4.605e-5  
0.761, -4.580e-5  
0.760, -4.555e-5  
0.759, -4.520e-5  
0.758, -4.497e-5  
0.757, -4.443e-5  
0.756, -4.417e-5  
0.755, -4.387e-5  
0.754, -4.389e-5  
0.753, -4.346e-5  
0.752, -4.318e-5  
0.751, -4.309e-5  
0.750, -4.280e-5  
0.749, -4.248e-5  
0.748, -4.237e-5  
0.747, -4.211e-5  
0.746, -4.182e-5  
0.745, -4.153e-5  
0.744, -4.129e-5  
0.743, -4.083e-5  
0.742, -4.064e-5  
0.741, -4.058e-5  
0.740, -4.039e-5  
0.739, -4.013e-5  
0.738, -3.977e-5  
0.737, -3.960e-5  
0.736, -3.923e-5  
0.735, -3.917e-5  
0.734, -3.913e-5  
0.733, -3.880e-5  
0.732, -3.841e-5  
0.731, -3.822e-5  
0.730, -3.800e-5  
0.729, -3.789e-5  
0.728, -3.771e-5  
0.727, -3.756e-5  
0.726, -3.727e-5  
0.725, -3.696e-5  
0.724, -3.689e-5  
0.723, -3.678e-5  
0.722, -3.658e-5  
0.721, -3.638e-5  
0.720, -3.619e-5  
0.719, -3.609e-5  
0.718, -3.581e-5  
0.717, -3.566e-5  
0.716, -3.542e-5

0.715, -3.511e-5  
0.714, -3.492e-5  
0.713, -3.467e-5  
0.712, -3.457e-5  
0.711, -3.440e-5  
0.710, -3.414e-5  
0.709, -3.402e-5  
0.708, -3.390e-5  
0.707, -3.372e-5  
0.706, -3.353e-5  
0.705, -3.329e-5  
0.704, -3.308e-5  
0.703, -3.292e-5  
0.702, -3.278e-5  
0.701, -3.257e-5  
0.700, -3.235e-5  
0.699, -3.233e-5  
0.698, -3.207e-5  
0.697, -3.184e-5  
0.696, -3.171e-5  
0.695, -3.154e-5  
0.694, -3.139e-5  
0.693, -3.130e-5  
0.692, -3.111e-5  
0.691, -3.102e-5  
0.690, -3.081e-5  
0.689, -3.050e-5  
0.688, -3.025e-5  
0.687, -3.025e-5  
0.686, -3.022e-5  
0.685, -3.008e-5  
0.684, -2.985e-5  
0.683, -2.983e-5  
0.682, -2.973e-5  
0.681, -2.948e-5  
0.680, -2.919e-5  
0.679, -2.907e-5  
0.678, -2.900e-5  
0.677, -2.895e-5  
0.676, -2.879e-5  
0.675, -2.840e-5  
0.674, -2.831e-5  
0.673, -2.822e-5  
0.672, -2.797e-5  
0.671, -2.790e-5  
0.670, -2.772e-5  
0.669, -2.773e-5  
0.668, -2.776e-5  
0.667, -2.774e-5  
0.666, -2.741e-5

0.665, -2.740e-5  
0.664, -2.733e-5  
0.663, -2.717e-5  
0.662, -2.703e-5  
0.661, -2.694e-5  
0.660, -2.691e-5  
0.659, -2.679e-5  
0.658, -2.658e-5  
0.657, -2.650e-5  
0.656, -2.634e-5  
0.655, -2.627e-5  
0.654, -2.611e-5  
0.653, -2.580e-5  
0.652, -2.564e-5  
0.651, -2.567e-5  
0.650, -2.548e-5  
0.649, -2.525e-5  
0.648, -2.542e-5  
0.647, -2.550e-5  
0.646, -2.536e-5  
0.645, -2.527e-5  
0.644, -2.501e-5  
0.643, -2.485e-5  
0.642, -2.474e-5  
0.641, -2.465e-5  
0.640, -2.451e-5  
0.639, -2.460e-5  
0.638, -2.447e-5  
0.637, -2.445e-5  
0.636, -2.412e-5  
0.635, -2.407e-5  
0.634, -2.407e-5  
0.633, -2.406e-5  
0.632, -2.406e-5  
0.631, -2.395e-5  
0.630, -2.382e-5  
0.629, -2.359e-5  
0.628, -2.357e-5  
0.627, -2.343e-5  
0.626, -2.339e-5  
0.625, -2.309e-5  
0.624, -2.288e-5  
0.623, -2.295e-5  
0.622, -2.296e-5  
0.621, -2.295e-5  
0.620, -2.283e-5  
0.619, -2.277e-5  
0.618, -2.271e-5  
0.617, -2.266e-5  
0.616, -2.243e-5

0.615, -2.232e-5  
0.614, -2.222e-5  
0.613, -2.225e-5  
0.612, -2.213e-5  
0.611, -2.201e-5  
0.610, -2.201e-5  
0.609, -2.183e-5  
0.608, -2.174e-5  
0.607, -2.162e-5  
0.606, -2.157e-5  
0.605, -2.149e-5  
0.604, -2.127e-5  
0.603, -2.113e-5  
0.602, -2.107e-5  
0.601, -2.107e-5  
0.600, -2.080e-5  
0.599, -2.080e-5  
0.598, -2.071e-5  
0.597, -2.046e-5  
0.596, -2.054e-5  
0.595, -2.053e-5  
0.594, -2.044e-5  
0.593, -2.039e-5  
0.592, -2.033e-5  
0.591, -2.025e-5  
0.590, -2.002e-5  
0.589, -1.986e-5  
0.588, -1.972e-5  
0.587, -1.967e-5  
0.586, -1.957e-5  
0.585, -1.960e-5  
0.584, -1.953e-5  
0.583, -1.921e-5  
0.582, -1.904e-5  
0.581, -1.913e-5  
0.580, -1.913e-5  
0.579, -1.894e-5  
0.578, -1.876e-5  
0.577, -1.858e-5  
0.576, -1.858e-5  
0.575, -1.861e-5  
0.574, -1.834e-5  
0.573, -1.817e-5  
0.572, -1.823e-5  
0.571, -1.830e-5  
0.570, -1.799e-5  
0.569, -1.767e-5  
0.568, -1.783e-5  
0.567, -1.784e-5  
0.566, -1.762e-5

0.565, -1.742e-5  
0.564, -1.737e-5  
0.563, -1.732e-5  
0.562, -1.729e-5  
0.561, -1.707e-5  
0.560, -1.703e-5  
0.559, -1.697e-5  
0.558, -1.660e-5  
0.557, -1.657e-5  
0.556, -1.651e-5  
0.555, -1.626e-5  
0.554, -1.624e-5  
0.553, -1.623e-5  
0.552, -1.612e-5  
0.551, -1.589e-5  
0.550, -1.564e-5  
0.549, -1.565e-5  
0.548, -1.562e-5  
0.547, -1.533e-5  
0.546, -1.522e-5  
0.545, -1.521e-5  
0.544, -1.496e-5  
0.543, -1.487e-5  
0.542, -1.478e-5  
0.541, -1.459e-5  
0.540, -1.435e-5  
0.539, -1.432e-5  
0.538, -1.410e-5  
0.537, -1.396e-5  
0.536, -1.379e-5  
0.535, -1.357e-5  
0.534, -1.342e-5  
0.533, -1.326e-5  
0.532, -1.308e-5  
0.531, -1.291e-5  
0.530, -1.259e-5  
0.529, -1.232e-5  
0.528, -1.230e-5  
0.527, -1.221e-5  
0.526, -1.208e-5  
0.525, -1.167e-5  
0.524, -1.137e-5  
0.523, -1.118e-5  
0.522, -1.106e-5  
0.521, -1.104e-5  
0.520, -1.078e-5  
0.519, -1.045e-5  
0.518, -1.035e-5  
0.517, -9.918e-6  
0.516, -9.712e-6

0.515, -9.653e-6  
0.514, -9.388e-6  
0.513, -9.270e-6  
0.512, -9.015e-6  
0.511, -8.572e-6  
0.510, -8.327e-6  
0.509, -8.160e-6  
0.508, -7.747e-6  
0.507, -7.669e-6  
0.506, -7.384e-6  
0.505, -7.187e-6  
0.504, -6.853e-6  
0.503, -6.529e-6  
0.502, -6.244e-6  
0.501, -5.969e-6  
0.500, -5.635e-6  
0.499, -5.232e-6  
0.498, -4.977e-6  
0.497, -4.712e-6  
0.496, -4.554e-6  
0.495, -4.289e-6  
0.494, -3.975e-6  
0.493, -3.513e-6  
0.492, -3.317e-6  
0.491, -3.051e-6  
0.490, -2.678e-6  
0.489, -2.364e-6  
0.488, -1.863e-6  
0.487, -1.637e-6  
0.486, -1.273e-6  
0.485, -8.606e-7  
0.484, -4.185e-7  
0.483, -2.024e-7  
0.482, 2.102e-7  
0.481, 6.818e-7  
0.480, 8.586e-7  
0.479, 1.379e-6  
0.478, 1.586e-6  
0.477, 2.018e-6  
0.476, 2.460e-6  
0.475, 3.010e-6  
0.474, 3.324e-6  
0.473, 3.835e-6  
0.472, 4.061e-6  
0.471, 4.326e-6  
0.470, 4.749e-6  
0.469, 5.299e-6  
0.468, 5.849e-6  
0.467, 6.203e-6  
0.466, 6.557e-6

0.465, 6.950e-6  
0.464, 7.362e-6  
0.463, 7.873e-6  
0.462, 8.217e-6  
0.461, 8.649e-6  
0.460, 9.042e-6  
0.459, 9.415e-6  
0.458, 9.838e-6  
0.457, 1.035e-5  
0.456, 1.070e-5  
0.455, 1.113e-5  
0.454, 1.171e-5  
0.453, 1.213e-5  
0.452, 1.266e-5  
0.451, 1.302e-5  
0.450, 1.332e-5  
0.449, 1.365e-5  
0.448, 1.411e-5  
0.447, 1.470e-5  
0.446, 1.515e-5  
0.445, 1.556e-5  
0.444, 1.587e-5  
0.443, 1.626e-5  
0.442, 1.674e-5  
0.441, 1.723e-5  
0.440, 1.758e-5  
0.439, 1.809e-5  
0.438, 1.850e-5  
0.437, 1.879e-5  
0.436, 1.921e-5  
0.435, 1.948e-5  
0.434, 1.981e-5  
0.433, 2.025e-5  
0.432, 2.062e-5  
0.431, 2.114e-5  
0.430, 2.171e-5  
0.429, 2.199e-5  
0.428, 2.218e-5  
0.427, 2.260e-5  
0.426, 2.291e-5  
0.425, 2.326e-5  
0.424, 2.372e-5  
0.423, 2.410e-5  
0.422, 2.447e-5  
0.421, 2.490e-5  
0.420, 2.522e-5  
0.419, 2.558e-5  
0.418, 2.591e-5  
0.417, 2.634e-5  
0.416, 2.662e-5

0.415, 2.699e-5  
0.414, 2.723e-5  
0.413, 2.769e-5  
0.412, 2.809e-5  
0.411, 2.836e-5  
0.410, 2.872e-5  
0.409, 2.914e-5  
0.408, 2.943e-5  
0.407, 2.976e-5  
0.406, 3.012e-5  
0.405, 3.040e-5  
0.404, 3.078e-5  
0.403, 3.112e-5  
0.402, 3.136e-5  
0.401, 3.172e-5  
0.400, 3.213e-5  
0.399, 3.243e-5  
0.398, 3.300e-5  
0.397, 3.304e-5  
0.396, 3.355e-5  
0.395, 3.394e-5  
0.394, 3.393e-5  
0.393, 3.425e-5  
0.392, 3.448e-5  
0.391, 3.488e-5  
0.390, 3.518e-5  
0.389, 3.528e-5  
0.388, 3.564e-5  
0.387, 3.591e-5  
0.386, 3.621e-5  
0.385, 3.662e-5  
0.384, 3.691e-5  
0.383, 3.719e-5  
0.382, 3.750e-5  
0.381, 3.770e-5  
0.380, 3.791e-5  
0.379, 3.814e-5  
0.378, 3.855e-5  
0.377, 3.895e-5  
0.376, 3.915e-5  
0.375, 3.950e-5  
0.374, 3.981e-5  
0.373, 4.010e-5  
0.372, 4.034e-5  
0.371, 4.060e-5  
0.370, 4.093e-5  
0.369, 4.112e-5  
0.368, 4.140e-5  
0.367, 4.171e-5  
0.366, 4.221e-5



0.365, 4.241e-5  
0.364, 4.264e-5  
0.363, 4.281e-5  
0.362, 4.322e-5  
0.361, 4.353e-5  
0.360, 4.376e-5  
0.359, 4.405e-5  
0.358, 4.436e-5  
0.357, 4.487e-5  
0.356, 4.516e-5  
0.355, 4.572e-5  
0.354, 4.596e-5  
0.353, 4.613e-5  
0.352, 4.633e-5  
0.351, 4.643e-5  
0.350, 4.678e-5  
0.349, 4.723e-5  
0.348, 4.750e-5  
0.347, 4.780e-5  
0.346, 4.813e-5  
0.345, 4.851e-5  
0.344, 4.872e-5  
0.343, 4.908e-5  
0.342, 4.949e-5  
0.341, 4.983e-5  
0.340, 5.034e-5  
0.339, 5.070e-5  
0.338, 5.092e-5  
0.337, 5.112e-5  
0.336, 5.153e-5  
0.335, 5.203e-5  
0.334, 5.223e-5  
0.333, 5.240e-5  
0.332, 5.269e-5  
0.331, 5.293e-5  
0.330, 5.336e-5  
0.329, 5.373e-5  
0.328, 5.405e-5  
0.327, 5.431e-5  
0.326, 5.449e-5  
0.325, 5.482e-5  
0.324, 5.529e-5  
0.323, 5.551e-5  
0.322, 5.577e-5  
0.321, 5.593e-5  
0.320, 5.648e-5  
0.319, 5.681e-5  
0.318, 5.686e-5  
0.317, 5.705e-5  
0.316, 5.743e-5

0.315, 5.793e-5  
0.314, 5.834e-5  
0.313, 5.854e-5  
0.312, 5.862e-5  
0.311, 5.892e-5  
0.310, 5.923e-5  
0.309, 5.945e-5  
0.308, 5.989e-5  
0.307, 6.045e-5  
0.306, 6.082e-5  
0.305, 6.106e-5  
0.304, 6.096e-5  
0.303, 6.126e-5  
0.302, 6.182e-5  
0.301, 6.206e-5  
0.300, 6.222e-5  
0.299, 6.258e-5  
0.298, 6.286e-5  
0.297, 6.305e-5  
0.296, 6.310e-5  
0.295, 6.342e-5  
0.294, 6.369e-5  
0.293, 6.386e-5  
0.292, 6.423e-5  
0.291, 6.447e-5  
0.290, 6.492e-5  
0.289, 6.502e-5  
0.288, 6.536e-5  
0.287, 6.566e-5  
0.286, 6.578e-5  
0.285, 6.583e-5  
0.284, 6.626e-5  
0.283, 6.645e-5  
0.282, 6.664e-5  
0.281, 6.698e-5  
0.280, 6.737e-5  
0.279, 6.746e-5  
0.278, 6.768e-5  
0.277, 6.792e-5  
0.276, 6.851e-5  
0.275, 6.870e-5  
0.274, 6.882e-5  
0.273, 6.897e-5  
0.272, 6.928e-5  
0.271, 6.970e-5  
0.270, 6.987e-5  
0.269, 6.986e-5  
0.268, 7.008e-5  
0.267, 7.024e-5  
0.266, 7.053e-5

0.265, 7.079e-5  
0.264, 7.112e-5  
0.263, 7.138e-5  
0.262, 7.154e-5  
0.261, 7.159e-5  
0.260, 7.196e-5  
0.259, 7.213e-5  
0.258, 7.239e-5  
0.257, 7.272e-5  
0.256, 7.278e-5  
0.255, 7.317e-5  
0.254, 7.345e-5  
0.253, 7.370e-5  
0.252, 7.374e-5  
0.251, 7.386e-5  
0.250, 7.408e-5  
0.249, 7.442e-5  
0.248, 7.481e-5  
0.247, 7.501e-5  
0.246, 7.507e-5  
0.245, 7.516e-5  
0.244, 7.535e-5  
0.243, 7.567e-5  
0.242, 7.582e-5  
0.241, 7.603e-5  
0.240, 7.604e-5  
0.239, 7.632e-5  
0.238, 7.679e-5  
0.237, 7.705e-5  
0.236, 7.706e-5  
0.235, 7.727e-5  
0.234, 7.747e-5  
0.233, 7.752e-5  
0.232, 7.779e-5  
0.231, 7.813e-5  
0.230, 7.809e-5  
0.229, 7.821e-5  
0.228, 7.854e-5  
0.227, 7.882e-5  
0.226, 7.896e-5  
0.225, 7.923e-5  
0.224, 7.926e-5  
0.223, 7.944e-5  
0.222, 7.981e-5  
0.221, 8.017e-5  
0.220, 8.027e-5  
0.219, 8.026e-5  
0.218, 8.044e-5  
0.217, 8.065e-5  
0.216, 8.087e-5

0.215, 8.098e-5  
0.214, 8.130e-5  
0.213, 8.138e-5  
0.212, 8.174e-5  
0.211, 8.224e-5  
0.210, 8.233e-5  
0.209, 8.239e-5  
0.208, 8.265e-5  
0.207, 8.275e-5  
0.206, 8.292e-5  
0.205, 8.307e-5  
0.204, 8.353e-5  
0.203, 8.379e-5  
0.202, 8.382e-5  
0.201, 8.394e-5  
0.200, 8.407e-5  
0.199, 8.436e-5  
0.198, 8.457e-5  
0.197, 8.475e-5  
0.196, 8.491e-5  
0.195, 8.508e-5  
0.194, 8.541e-5  
0.193, 8.575e-5  
0.192, 8.590e-5  
0.191, 8.608e-5  
0.190, 8.624e-5  
0.189, 8.641e-5  
0.188, 8.660e-5  
0.187, 8.676e-5  
0.186, 8.692e-5  
0.185, 8.713e-5  
0.184, 8.737e-5  
0.183, 8.759e-5  
0.182, 8.788e-5  
0.181, 8.810e-5  
0.180, 8.832e-5  
0.179, 8.865e-5  
0.178, 8.881e-5  
0.177, 8.897e-5  
0.176, 8.948e-5  
0.175, 8.961e-5  
0.174, 8.987e-5  
0.173, 8.999e-5  
0.172, 9.003e-5  
0.171, 9.020e-5  
0.170, 9.059e-5  
0.169, 9.076e-5  
0.168, 9.083e-5  
0.167, 9.123e-5  
0.166, 9.150e-5

0.165, 9.166e-5  
0.164, 9.188e-5  
0.163, 9.202e-5  
0.162, 9.216e-5  
0.161, 9.236e-5  
0.160, 9.265e-5  
0.159, 9.295e-5  
0.158, 9.322e-5  
0.157, 9.351e-5  
0.156, 9.373e-5  
0.155, 9.407e-5  
0.154, 9.436e-5  
0.153, 9.448e-5  
0.152, 9.498e-5  
0.151, 9.541e-5  
0.150, 9.545e-5  
0.149, 9.568e-5  
0.148, 9.603e-5  
0.147, 9.606e-5  
0.146, 9.622e-5  
0.145, 9.648e-5  
0.144, 9.669e-5  
0.143, 9.687e-5  
0.142, 9.713e-5  
0.141, 9.741e-5  
0.140, 9.809e-5  
0.139, 9.828e-5  
0.138, 9.864e-5  
0.137, 9.893e-5  
0.136, 9.906e-5  
0.135, 9.935e-5  
0.134, 9.941e-5  
0.133, 9.963e-5  
0.132, 9.999e-5  
0.131, 1.003e-4  
0.130, 1.007e-4  
0.129, 1.009e-4  
0.128, 1.013e-4  
0.127, 1.015e-4  
0.126, 1.016e-4  
0.125, 1.019e-4  
0.124, 1.023e-4  
0.123, 1.025e-4  
0.122, 1.031e-4  
0.121, 1.034e-4  
0.120, 1.039e-4  
0.119, 1.042e-4  
0.118, 1.042e-4  
0.117, 1.044e-4  
0.116, 1.048e-4

0.115, 1.051e-4  
0.114, 1.057e-4  
0.113, 1.060e-4  
0.112, 1.064e-4  
0.111, 1.066e-4  
0.110, 1.070e-4  
0.109, 1.075e-4  
0.108, 1.077e-4  
0.107, 1.084e-4  
0.106, 1.085e-4  
0.105, 1.086e-4  
0.104, 1.093e-4  
0.103, 1.098e-4  
0.102, 1.100e-4  
0.101, 1.102e-4  
0.100, 1.105e-4  
0.099, 1.108e-4  
0.098, 1.111e-4  
0.097, 1.116e-4  
0.096, 1.119e-4  
0.095, 1.122e-4  
0.094, 1.127e-4  
0.093, 1.131e-4  
0.092, 1.138e-4  
0.091, 1.141e-4  
0.090, 1.144e-4  
0.089, 1.149e-4  
0.088, 1.155e-4  
0.087, 1.160e-4  
0.086, 1.162e-4  
0.085, 1.165e-4  
0.084, 1.169e-4  
0.083, 1.173e-4  
0.082, 1.177e-4  
0.081, 1.181e-4  
0.080, 1.185e-4  
0.079, 1.188e-4  
0.078, 1.192e-4  
0.077, 1.197e-4  
0.076, 1.203e-4  
0.075, 1.206e-4  
0.074, 1.211e-4  
0.073, 1.216e-4  
0.072, 1.221e-4  
0.071, 1.225e-4  
0.070, 1.230e-4  
0.069, 1.234e-4  
0.068, 1.241e-4  
0.067, 1.246e-4  
0.066, 1.250e-4

0.065, 1.255e-4  
0.064, 1.258e-4  
0.063, 1.266e-4  
0.062, 1.270e-4  
0.061, 1.275e-4  
0.060, 1.282e-4  
0.059, 1.287e-4  
0.058, 1.290e-4  
0.057, 1.294e-4  
0.056, 1.299e-4  
0.055, 1.303e-4  
0.054, 1.312e-4  
0.053, 1.315e-4  
0.052, 1.320e-4  
0.051, 1.324e-4  
0.050, 1.329e-4  
0.049, 1.333e-4  
0.048, 1.339e-4  
0.047, 1.344e-4  
0.046, 1.348e-4  
0.045, 1.353e-4  
0.044, 1.358e-4  
0.043, 1.363e-4  
0.042, 1.369e-4  
0.041, 1.375e-4  
0.040, 1.382e-4  
0.039, 1.388e-4  
0.038, 1.394e-4  
0.037, 1.399e-4  
0.036, 1.403e-4  
0.035, 1.408e-4  
0.034, 1.412e-4  
0.033, 1.418e-4  
0.032, 1.427e-4  
0.031, 1.431e-4  
0.030, 1.435e-4  
0.029, 1.441e-4  
0.028, 1.444e-4  
0.027, 1.449e-4  
0.026, 1.456e-4  
0.025, 1.461e-4  
0.024, 1.469e-4  
0.023, 1.476e-4  
0.022, 1.481e-4  
0.021, 1.487e-4  
0.020, 1.491e-4  
0.019, 1.498e-4  
0.018, 1.504e-4  
0.017, 1.508e-4  
0.016, 1.514e-4

0.015, 1.519e-4  
0.014, 1.525e-4  
0.013, 1.530e-4  
0.012, 1.534e-4  
0.011, 1.539e-4  
0.010, 1.544e-4  
0.009, 1.549e-4  
0.008, 1.556e-4  
0.007, 1.560e-4  
0.006, 1.567e-4  
0.005, 1.571e-4  
0.004, 1.575e-4  
0.003, 1.581e-4  
0.002, 1.587e-4  
0.001, 1.591e-4  
0.000, 1.598e-4  
-0.001, 1.605e-4  
-0.002, 1.609e-4  
-0.003, 1.615e-4  
-0.004, 1.622e-4  
-0.005, 1.626e-4  
-0.006, 1.632e-4  
-0.007, 1.640e-4  
-0.008, 1.644e-4  
-0.009, 1.647e-4  
-0.010, 1.655e-4  
-0.011, 1.661e-4  
-0.012, 1.664e-4  
-0.013, 1.669e-4  
-0.014, 1.674e-4  
-0.015, 1.678e-4  
-0.016, 1.686e-4  
-0.017, 1.689e-4  
-0.018, 1.694e-4  
-0.019, 1.699e-4  
-0.020, 1.704e-4  
-0.021, 1.707e-4  
-0.022, 1.713e-4  
-0.023, 1.717e-4  
-0.024, 1.721e-4  
-0.025, 1.728e-4  
-0.026, 1.733e-4  
-0.027, 1.736e-4  
-0.028, 1.742e-4  
-0.029, 1.746e-4  
-0.030, 1.751e-4  
-0.031, 1.758e-4  
-0.032, 1.761e-4  
-0.033, 1.765e-4  
-0.034, 1.770e-4



-0.035, 1.775e-4  
-0.036, 1.780e-4  
-0.037, 1.784e-4  
-0.038, 1.786e-4  
-0.039, 1.793e-4  
-0.040, 1.799e-4  
-0.041, 1.804e-4  
-0.042, 1.807e-4  
-0.043, 1.812e-4  
-0.044, 1.815e-4  
-0.045, 1.820e-4  
-0.046, 1.824e-4  
-0.047, 1.827e-4  
-0.048, 1.830e-4  
-0.049, 1.834e-4  
-0.050, 1.838e-4  
-0.051, 1.841e-4  
-0.052, 1.847e-4  
-0.053, 1.851e-4  
-0.054, 1.856e-4  
-0.055, 1.860e-4  
-0.056, 1.864e-4  
-0.057, 1.872e-4  
-0.058, 1.877e-4  
-0.059, 1.880e-4  
-0.060, 1.882e-4  
-0.061, 1.887e-4  
-0.062, 1.891e-4  
-0.063, 1.894e-4  
-0.064, 1.898e-4  
-0.065, 1.900e-4  
-0.066, 1.903e-4  
-0.067, 1.907e-4  
-0.068, 1.909e-4  
-0.069, 1.914e-4  
-0.070, 1.919e-4  
-0.071, 1.922e-4  
-0.072, 1.924e-4  
-0.073, 1.930e-4  
-0.074, 1.932e-4  
-0.075, 1.937e-4  
-0.076, 1.940e-4  
-0.077, 1.943e-4  
-0.078, 1.944e-4  
-0.079, 1.950e-4  
-0.080, 1.953e-4  
-0.081, 1.958e-4  
-0.082, 1.961e-4  
-0.083, 1.963e-4  
-0.084, 1.967e-4

-0.085, 1.975e-4  
-0.086, 1.977e-4  
-0.087, 1.978e-4  
-0.088, 1.981e-4  
-0.089, 1.984e-4  
-0.090, 1.989e-4  
-0.091, 1.991e-4  
-0.092, 1.994e-4  
-0.093, 2.000e-4  
-0.094, 2.005e-4  
-0.095, 2.007e-4  
-0.096, 2.010e-4  
-0.097, 2.013e-4  
-0.098, 2.015e-4  
-0.099, 2.019e-4  
-0.100, 2.023e-4  
-0.101, 2.026e-4  
-0.102, 2.030e-4  
-0.103, 2.030e-4  
-0.104, 2.033e-4  
-0.105, 2.037e-4  
-0.106, 2.042e-4  
-0.107, 2.043e-4  
-0.108, 2.044e-4  
-0.109, 2.046e-4  
-0.110, 2.048e-4  
-0.111, 2.051e-4  
-0.112, 2.056e-4  
-0.113, 2.060e-4  
-0.114, 2.062e-4  
-0.115, 2.063e-4  
-0.116, 2.065e-4  
-0.117, 2.069e-4  
-0.118, 2.072e-4  
-0.119, 2.076e-4  
-0.120, 2.080e-4  
-0.121, 2.080e-4  
-0.122, 2.083e-4  
-0.123, 2.085e-4  
-0.124, 2.088e-4  
-0.125, 2.089e-4  
-0.126, 2.093e-4  
-0.127, 2.097e-4  
-0.128, 2.098e-4  
-0.129, 2.100e-4  
-0.130, 2.102e-4  
-0.131, 2.105e-4  
-0.132, 2.109e-4  
-0.133, 2.114e-4  
-0.134, 2.115e-4

-0.135, 2.115e-4  
-0.136, 2.117e-4  
-0.137, 2.120e-4  
-0.138, 2.123e-4  
-0.139, 2.123e-4  
-0.140, 2.127e-4  
-0.141, 2.129e-4  
-0.142, 2.131e-4  
-0.143, 2.133e-4  
-0.144, 2.135e-4  
-0.145, 2.139e-4  
-0.146, 2.141e-4  
-0.147, 2.142e-4  
-0.148, 2.145e-4  
-0.149, 2.149e-4  
-0.150, 2.151e-4  
-0.151, 2.152e-4  
-0.152, 2.154e-4  
-0.153, 2.157e-4  
-0.154, 2.159e-4  
-0.155, 2.160e-4  
-0.156, 2.161e-4  
-0.157, 2.162e-4  
-0.158, 2.164e-4  
-0.159, 2.166e-4  
-0.160, 2.170e-4  
-0.161, 2.171e-4  
-0.162, 2.172e-4  
-0.163, 2.174e-4  
-0.164, 2.176e-4  
-0.165, 2.179e-4  
-0.166, 2.182e-4  
-0.167, 2.181e-4  
-0.168, 2.182e-4  
-0.169, 2.184e-4  
-0.170, 2.187e-4  
-0.171, 2.190e-4  
-0.172, 2.192e-4  
-0.173, 2.194e-4  
-0.174, 2.195e-4  
-0.175, 2.200e-4  
-0.176, 2.201e-4  
-0.177, 2.200e-4  
-0.178, 2.201e-4  
-0.179, 2.203e-4  
-0.180, 2.205e-4  
-0.181, 2.207e-4  
-0.182, 2.209e-4  
-0.183, 2.211e-4  
-0.184, 2.213e-4

-0.185, 2.214e-4  
-0.186, 2.216e-4  
-0.187, 2.218e-4  
-0.188, 2.219e-4  
-0.189, 2.220e-4  
-0.190, 2.222e-4  
-0.191, 2.223e-4  
-0.192, 2.226e-4  
-0.193, 2.227e-4  
-0.194, 2.229e-4  
-0.195, 2.231e-4  
-0.196, 2.232e-4  
-0.197, 2.233e-4  
-0.198, 2.236e-4  
-0.199, 2.237e-4  
-0.200, 2.238e-4  
-0.201, 2.241e-4  
-0.202, 2.243e-4  
-0.203, 2.243e-4  
-0.204, 2.246e-4  
-0.205, 2.248e-4  
-0.206, 2.248e-4  
-0.207, 2.251e-4  
-0.208, 2.252e-4  
-0.209, 2.252e-4  
-0.210, 2.253e-4  
-0.211, 2.255e-4  
-0.212, 2.257e-4  
-0.213, 2.259e-4  
-0.214, 2.260e-4  
-0.215, 2.262e-4  
-0.216, 2.264e-4  
-0.217, 2.267e-4  
-0.218, 2.266e-4  
-0.219, 2.268e-4  
-0.220, 2.271e-4  
-0.221, 2.272e-4  
-0.222, 2.273e-4  
-0.223, 2.273e-4  
-0.224, 2.274e-4  
-0.225, 2.277e-4  
-0.226, 2.280e-4  
-0.227, 2.282e-4  
-0.228, 2.286e-4  
-0.229, 2.287e-4  
-0.230, 2.289e-4  
-0.231, 2.290e-4  
-0.232, 2.291e-4  
-0.233, 2.291e-4  
-0.234, 2.292e-4

-0.235, 2.293e-4  
-0.236, 2.293e-4  
-0.237, 2.294e-4  
-0.238, 2.296e-4  
-0.239, 2.299e-4  
-0.240, 2.302e-4  
-0.241, 2.304e-4  
-0.242, 2.303e-4  
-0.243, 2.305e-4  
-0.244, 2.308e-4  
-0.245, 2.311e-4  
-0.246, 2.314e-4  
-0.247, 2.316e-4  
-0.248, 2.316e-4  
-0.249, 2.319e-4  
-0.250, 2.323e-4  
-0.251, 2.325e-4  
-0.252, 2.327e-4  
-0.253, 2.329e-4  
-0.254, 2.331e-4  
-0.255, 2.333e-4  
-0.256, 2.334e-4  
-0.257, 2.335e-4  
-0.258, 2.337e-4  
-0.259, 2.340e-4  
-0.260, 2.341e-4  
-0.261, 2.346e-4  
-0.262, 2.349e-4  
-0.263, 2.351e-4  
-0.264, 2.354e-4  
-0.265, 2.357e-4  
-0.266, 2.359e-4  
-0.267, 2.365e-4  
-0.268, 2.367e-4  
-0.269, 2.368e-4  
-0.270, 2.373e-4  
-0.271, 2.377e-4  
-0.272, 2.379e-4  
-0.273, 2.386e-4  
-0.274, 2.388e-4  
-0.275, 2.392e-4  
-0.276, 2.398e-4  
-0.277, 2.402e-4  
-0.278, 2.407e-4  
-0.279, 2.413e-4  
-0.280, 2.417e-4  
-0.281, 2.421e-4  
-0.282, 2.425e-4  
-0.283, 2.429e-4  
-0.284, 2.432e-4

-0.285, 2.436e-4  
-0.286, 2.444e-4  
-0.287, 2.449e-4  
-0.288, 2.455e-4  
-0.289, 2.461e-4  
-0.290, 2.465e-4  
-0.291, 2.470e-4  
-0.292, 2.476e-4  
-0.293, 2.481e-4  
-0.294, 2.488e-4  
-0.295, 2.493e-4  
-0.296, 2.501e-4  
-0.297, 2.507e-4  
-0.298, 2.512e-4  
-0.299, 2.520e-4  
-0.300, 2.530e-4  
-0.301, 2.536e-4  
-0.302, 2.541e-4  
-0.303, 2.549e-4  
-0.304, 2.557e-4  
-0.305, 2.563e-4  
-0.306, 2.571e-4  
-0.307, 2.577e-4  
-0.308, 2.584e-4  
-0.309, 2.594e-4  
-0.310, 2.601e-4  
-0.311, 2.609e-4  
-0.312, 2.616e-4  
-0.313, 2.624e-4  
-0.314, 2.629e-4  
-0.315, 2.636e-4  
-0.316, 2.644e-4  
-0.317, 2.650e-4  
-0.318, 2.658e-4  
-0.319, 2.665e-4  
-0.320, 2.670e-4  
-0.321, 2.679e-4  
-0.322, 2.690e-4  
-0.323, 2.696e-4  
-0.324, 2.704e-4  
-0.325, 2.712e-4  
-0.326, 2.721e-4  
-0.327, 2.729e-4  
-0.328, 2.736e-4  
-0.329, 2.744e-4  
-0.330, 2.752e-4  
-0.331, 2.758e-4  
-0.332, 2.766e-4  
-0.333, 2.774e-4  
-0.334, 2.783e-4

-0.335, 2.789e-4  
-0.336, 2.799e-4  
-0.337, 2.805e-4  
-0.338, 2.811e-4  
-0.339, 2.821e-4  
-0.340, 2.828e-4  
-0.341, 2.835e-4  
-0.342, 2.844e-4  
-0.343, 2.852e-4  
-0.344, 2.861e-4  
-0.345, 2.868e-4  
-0.346, 2.874e-4  
-0.347, 2.881e-4  
-0.348, 2.888e-4  
-0.349, 2.893e-4  
-0.350, 2.897e-4  
-0.351, 2.905e-4  
-0.352, 2.913e-4  
-0.353, 2.919e-4  
-0.354, 2.927e-4  
-0.355, 2.936e-4  
-0.356, 2.940e-4  
-0.357, 2.948e-4  
-0.358, 2.955e-4  
-0.359, 2.965e-4  
-0.360, 2.975e-4  
-0.361, 2.981e-4  
-0.362, 2.983e-4  
-0.363, 2.989e-4  
-0.364, 2.996e-4  
-0.365, 3.004e-4  
-0.366, 3.010e-4  
-0.367, 3.016e-4  
-0.368, 3.022e-4  
-0.369, 3.028e-4  
-0.370, 3.036e-4  
-0.371, 3.042e-4  
-0.372, 3.047e-4  
-0.373, 3.051e-4  
-0.374, 3.055e-4  
-0.375, 3.064e-4  
-0.376, 3.068e-4  
-0.377, 3.074e-4  
-0.378, 3.081e-4  
-0.379, 3.089e-4  
-0.380, 3.095e-4  
-0.381, 3.101e-4  
-0.382, 3.107e-4  
-0.383, 3.113e-4  
-0.384, 3.118e-4

-0.385, 3.121e-4  
-0.386, 3.125e-4  
-0.387, 3.134e-4  
-0.388, 3.141e-4  
-0.389, 3.148e-4  
-0.390, 3.155e-4  
-0.391, 3.158e-4  
-0.392, 3.163e-4  
-0.393, 3.171e-4  
-0.394, 3.178e-4  
-0.395, 3.184e-4  
-0.396, 3.190e-4  
-0.397, 3.193e-4  
-0.398, 3.200e-4  
-0.399, 3.209e-4

Mar. 29, 2021 05:18:33

Linear Sweep Voltammetry

File: c:\users\shadji04\desktop\sofia cv\29032021\complex 6 sweep scan under nitrogen ph 2.5\1500 rpm.txt

Data Source: Experiment

Instrument Model: CHI650E

Header:

Note: 1500 rpm

Init E (V) = 0.8

Final E (V) = -0.4

Scan Rate (V/s) = 0.025

Sample Interval (V) = 0.001

Quiet Time (sec) = 2

Sensitivity (A/V) = 0.01

Potential/V, Current/A

0.800, -7.203e-5

0.799, -7.136e-5

0.798, -7.110e-5

0.797, -7.079e-5

0.796, -7.047e-5

0.795, -6.973e-5

0.794, -6.956e-5

0.793, -6.928e-5

0.792, -6.896e-5

0.791, -6.858e-5

0.790, -6.816e-5

0.789, -6.774e-5

0.788, -6.733e-5

0.787, -6.693e-5

0.786, -6.656e-5

0.785, -6.615e-5

0.784, -6.581e-5

0.783, -6.549e-5

0.782, -6.503e-5

0.781, -6.441e-5



0.780, -6.408e-5  
0.779, -6.382e-5  
0.778, -6.346e-5  
0.777, -6.324e-5  
0.776, -6.298e-5  
0.775, -6.268e-5  
0.774, -6.219e-5  
0.773, -6.185e-5  
0.772, -6.133e-5  
0.771, -6.107e-5  
0.770, -6.072e-5  
0.769, -6.038e-5  
0.768, -6.013e-5  
0.767, -5.975e-5  
0.766, -5.941e-5  
0.765, -5.921e-5  
0.764, -5.895e-5  
0.763, -5.861e-5  
0.762, -5.827e-5  
0.761, -5.791e-5  
0.760, -5.756e-5  
0.759, -5.718e-5  
0.758, -5.683e-5  
0.757, -5.656e-5  
0.756, -5.607e-5  
0.755, -5.565e-5  
0.754, -5.528e-5  
0.753, -5.487e-5  
0.752, -5.459e-5  
0.751, -5.435e-5  
0.750, -5.418e-5  
0.749, -5.395e-5  
0.748, -5.369e-5  
0.747, -5.335e-5  
0.746, -5.309e-5  
0.745, -5.274e-5  
0.744, -5.238e-5  
0.743, -5.209e-5  
0.742, -5.176e-5  
0.741, -5.141e-5  
0.740, -5.122e-5  
0.739, -5.061e-5  
0.738, -5.053e-5  
0.737, -5.011e-5  
0.736, -4.982e-5  
0.735, -4.972e-5  
0.734, -4.947e-5  
0.733, -4.925e-5  
0.732, -4.897e-5  
0.731, -4.880e-5

0.730, -4.830e-5  
0.729, -4.801e-5  
0.728, -4.774e-5  
0.727, -4.745e-5  
0.726, -4.709e-5  
0.725, -4.666e-5  
0.724, -4.660e-5  
0.723, -4.645e-5  
0.722, -4.622e-5  
0.721, -4.600e-5  
0.720, -4.571e-5  
0.719, -4.557e-5  
0.718, -4.530e-5  
0.717, -4.498e-5  
0.716, -4.465e-5  
0.715, -4.455e-5  
0.714, -4.432e-5  
0.713, -4.406e-5  
0.712, -4.385e-5  
0.711, -4.341e-5  
0.710, -4.315e-5  
0.709, -4.295e-5  
0.708, -4.279e-5  
0.707, -4.248e-5  
0.706, -4.222e-5  
0.705, -4.191e-5  
0.704, -4.159e-5  
0.703, -4.150e-5  
0.702, -4.137e-5  
0.701, -4.101e-5  
0.700, -4.070e-5  
0.699, -4.065e-5  
0.698, -4.036e-5  
0.697, -4.016e-5  
0.696, -4.021e-5  
0.695, -3.978e-5  
0.694, -3.945e-5  
0.693, -3.949e-5  
0.692, -3.949e-5  
0.691, -3.920e-5  
0.690, -3.894e-5  
0.689, -3.880e-5  
0.688, -3.868e-5  
0.687, -3.855e-5  
0.686, -3.835e-5  
0.685, -3.792e-5  
0.684, -3.781e-5  
0.683, -3.777e-5  
0.682, -3.758e-5  
0.681, -3.746e-5

0.680, -3.740e-5  
0.679, -3.717e-5  
0.678, -3.688e-5  
0.677, -3.674e-5  
0.676, -3.656e-5  
0.675, -3.650e-5  
0.674, -3.625e-5  
0.673, -3.608e-5  
0.672, -3.599e-5  
0.671, -3.573e-5  
0.670, -3.551e-5  
0.669, -3.534e-5  
0.668, -3.507e-5  
0.667, -3.492e-5  
0.666, -3.471e-5  
0.665, -3.461e-5  
0.664, -3.461e-5  
0.663, -3.447e-5  
0.662, -3.432e-5  
0.661, -3.423e-5  
0.660, -3.391e-5  
0.659, -3.378e-5  
0.658, -3.373e-5  
0.657, -3.359e-5  
0.656, -3.354e-5  
0.655, -3.334e-5  
0.654, -3.327e-5  
0.653, -3.305e-5  
0.652, -3.308e-5  
0.651, -3.290e-5  
0.650, -3.272e-5  
0.649, -3.261e-5  
0.648, -3.260e-5  
0.647, -3.247e-5  
0.646, -3.230e-5  
0.645, -3.226e-5  
0.644, -3.209e-5  
0.643, -3.192e-5  
0.642, -3.175e-5  
0.641, -3.144e-5  
0.640, -3.132e-5  
0.639, -3.123e-5  
0.638, -3.105e-5  
0.637, -3.125e-5  
0.636, -3.103e-5  
0.635, -3.066e-5  
0.634, -3.055e-5  
0.633, -3.065e-5  
0.632, -3.056e-5  
0.631, -3.032e-5

0.630, -3.019e-5  
0.629, -3.022e-5  
0.628, -3.019e-5  
0.627, -3.005e-5  
0.626, -2.989e-5  
0.625, -2.975e-5  
0.624, -2.938e-5  
0.623, -2.944e-5  
0.622, -2.946e-5  
0.621, -2.931e-5  
0.620, -2.918e-5  
0.619, -2.909e-5  
0.618, -2.898e-5  
0.617, -2.861e-5  
0.616, -2.849e-5  
0.615, -2.831e-5  
0.614, -2.824e-5  
0.613, -2.817e-5  
0.612, -2.821e-5  
0.611, -2.813e-5  
0.610, -2.809e-5  
0.609, -2.787e-5  
0.608, -2.748e-5  
0.607, -2.748e-5  
0.606, -2.727e-5  
0.605, -2.741e-5  
0.604, -2.734e-5  
0.603, -2.714e-5  
0.602, -2.694e-5  
0.601, -2.699e-5  
0.600, -2.707e-5  
0.599, -2.689e-5  
0.598, -2.675e-5  
0.597, -2.669e-5  
0.596, -2.647e-5  
0.595, -2.595e-5  
0.594, -2.590e-5  
0.593, -2.610e-5  
0.592, -2.580e-5  
0.591, -2.573e-5  
0.590, -2.573e-5  
0.589, -2.567e-5  
0.588, -2.544e-5  
0.587, -2.541e-5  
0.586, -2.543e-5  
0.585, -2.504e-5  
0.584, -2.500e-5  
0.583, -2.495e-5  
0.582, -2.499e-5  
0.581, -2.492e-5

0.580, -2.479e-5  
0.579, -2.448e-5  
0.578, -2.422e-5  
0.577, -2.409e-5  
0.576, -2.403e-5  
0.575, -2.405e-5  
0.574, -2.372e-5  
0.573, -2.343e-5  
0.572, -2.347e-5  
0.571, -2.347e-5  
0.570, -2.325e-5  
0.569, -2.309e-5  
0.568, -2.294e-5  
0.567, -2.287e-5  
0.566, -2.271e-5  
0.565, -2.263e-5  
0.564, -2.239e-5  
0.563, -2.209e-5  
0.562, -2.208e-5  
0.561, -2.216e-5  
0.560, -2.201e-5  
0.559, -2.183e-5  
0.558, -2.170e-5  
0.557, -2.148e-5  
0.556, -2.132e-5  
0.555, -2.116e-5  
0.554, -2.107e-5  
0.553, -2.087e-5  
0.552, -2.060e-5  
0.551, -2.039e-5  
0.550, -2.019e-5  
0.549, -1.998e-5  
0.548, -1.998e-5  
0.547, -1.962e-5  
0.546, -1.948e-5  
0.545, -1.922e-5  
0.544, -1.923e-5  
0.543, -1.905e-5  
0.542, -1.895e-5  
0.541, -1.866e-5  
0.540, -1.825e-5  
0.539, -1.830e-5  
0.538, -1.799e-5  
0.537, -1.777e-5  
0.536, -1.764e-5  
0.535, -1.730e-5  
0.534, -1.733e-5  
0.533, -1.698e-5  
0.532, -1.683e-5  
0.531, -1.671e-5

0.530, -1.639e-5  
0.529, -1.601e-5  
0.528, -1.584e-5  
0.527, -1.577e-5  
0.526, -1.533e-5  
0.525, -1.483e-5  
0.524, -1.469e-5  
0.523, -1.435e-5  
0.522, -1.418e-5  
0.521, -1.392e-5  
0.520, -1.382e-5  
0.519, -1.364e-5  
0.518, -1.317e-5  
0.517, -1.300e-5  
0.516, -1.270e-5  
0.515, -1.243e-5  
0.514, -1.225e-5  
0.513, -1.185e-5  
0.512, -1.131e-5  
0.511, -1.083e-5  
0.510, -1.076e-5  
0.509, -1.047e-5  
0.508, -1.022e-5  
0.507, -1.002e-5  
0.506, -9.692e-6  
0.505, -9.299e-6  
0.504, -8.779e-6  
0.503, -8.415e-6  
0.502, -8.189e-6  
0.501, -7.767e-6  
0.500, -7.276e-6  
0.499, -6.853e-6  
0.498, -6.637e-6  
0.497, -6.274e-6  
0.496, -6.077e-6  
0.495, -5.547e-6  
0.494, -5.026e-6  
0.493, -4.495e-6  
0.492, -4.201e-6  
0.491, -3.906e-6  
0.490, -3.474e-6  
0.489, -3.071e-6  
0.488, -2.531e-6  
0.487, -2.138e-6  
0.486, -1.647e-6  
0.485, -1.244e-6  
0.484, -8.409e-7  
0.483, -3.890e-7  
0.482, 7.270e-8  
0.481, 5.246e-7

0.480, 1.163e-6  
0.479, 1.684e-6  
0.478, 2.028e-6  
0.477, 2.509e-6  
0.476, 3.010e-6  
0.475, 3.560e-6  
0.474, 4.110e-6  
0.473, 4.611e-6  
0.472, 5.201e-6  
0.471, 5.790e-6  
0.470, 6.488e-6  
0.469, 6.999e-6  
0.468, 7.460e-6  
0.467, 7.844e-6  
0.466, 8.286e-6  
0.465, 9.081e-6  
0.464, 9.612e-6  
0.463, 1.006e-5  
0.462, 1.055e-5  
0.461, 1.112e-5  
0.460, 1.171e-5  
0.459, 1.224e-5  
0.458, 1.285e-5  
0.457, 1.341e-5  
0.456, 1.395e-5  
0.455, 1.445e-5  
0.454, 1.512e-5  
0.453, 1.583e-5  
0.452, 1.626e-5  
0.451, 1.667e-5  
0.450, 1.721e-5  
0.449, 1.776e-5  
0.448, 1.823e-5  
0.447, 1.864e-5  
0.446, 1.937e-5  
0.445, 2.012e-5  
0.444, 2.064e-5  
0.443, 2.136e-5  
0.442, 2.180e-5  
0.441, 2.235e-5  
0.440, 2.276e-5  
0.439, 2.316e-5  
0.438, 2.366e-5  
0.437, 2.430e-5  
0.436, 2.511e-5  
0.435, 2.533e-5  
0.434, 2.571e-5  
0.433, 2.633e-5  
0.432, 2.676e-5  
0.431, 2.722e-5

0.430, 2.769e-5  
0.429, 2.815e-5  
0.428, 2.854e-5  
0.427, 2.915e-5  
0.426, 2.979e-5  
0.425, 3.038e-5  
0.424, 3.090e-5  
0.423, 3.146e-5  
0.422, 3.186e-5  
0.421, 3.223e-5  
0.420, 3.261e-5  
0.419, 3.293e-5  
0.418, 3.344e-5  
0.417, 3.394e-5  
0.416, 3.430e-5  
0.415, 3.470e-5  
0.414, 3.499e-5  
0.413, 3.563e-5  
0.412, 3.614e-5  
0.411, 3.646e-5  
0.410, 3.700e-5  
0.409, 3.730e-5  
0.408, 3.757e-5  
0.407, 3.805e-5  
0.406, 3.875e-5  
0.405, 3.932e-5  
0.404, 3.962e-5  
0.403, 3.993e-5  
0.402, 4.048e-5  
0.401, 4.071e-5  
0.400, 4.118e-5  
0.399, 4.154e-5  
0.398, 4.176e-5  
0.397, 4.204e-5  
0.396, 4.244e-5  
0.395, 4.291e-5  
0.394, 4.324e-5  
0.393, 4.363e-5  
0.392, 4.404e-5  
0.391, 4.430e-5  
0.390, 4.461e-5  
0.389, 4.519e-5  
0.388, 4.586e-5  
0.387, 4.616e-5  
0.386, 4.628e-5  
0.385, 4.656e-5  
0.384, 4.694e-5  
0.383, 4.744e-5  
0.382, 4.786e-5  
0.381, 4.818e-5



0.380, 4.851e-5  
0.379, 4.891e-5  
0.378, 4.953e-5  
0.377, 4.978e-5  
0.376, 5.020e-5  
0.375, 5.037e-5  
0.374, 5.066e-5  
0.373, 5.101e-5  
0.372, 5.149e-5  
0.371, 5.180e-5  
0.370, 5.219e-5  
0.369, 5.255e-5  
0.368, 5.302e-5  
0.367, 5.343e-5  
0.366, 5.386e-5  
0.365, 5.422e-5  
0.364, 5.457e-5  
0.363, 5.495e-5  
0.362, 5.542e-5  
0.361, 5.589e-5  
0.360, 5.616e-5  
0.359, 5.646e-5  
0.358, 5.705e-5  
0.357, 5.740e-5  
0.356, 5.764e-5  
0.355, 5.799e-5  
0.354, 5.835e-5  
0.353, 5.869e-5  
0.352, 5.909e-5  
0.351, 5.940e-5  
0.350, 5.979e-5  
0.349, 6.018e-5  
0.348, 6.068e-5  
0.347, 6.123e-5  
0.346, 6.163e-5  
0.345, 6.192e-5  
0.344, 6.225e-5  
0.343, 6.265e-5  
0.342, 6.294e-5  
0.341, 6.335e-5  
0.340, 6.368e-5  
0.339, 6.404e-5  
0.338, 6.463e-5  
0.337, 6.482e-5  
0.336, 6.515e-5  
0.335, 6.552e-5  
0.334, 6.616e-5  
0.333, 6.653e-5  
0.332, 6.679e-5  
0.331, 6.715e-5

0.330, 6.765e-5  
0.329, 6.786e-5  
0.328, 6.816e-5  
0.327, 6.863e-5  
0.326, 6.894e-5  
0.325, 6.944e-5  
0.324, 6.992e-5  
0.323, 7.007e-5  
0.322, 7.044e-5  
0.321, 7.095e-5  
0.320, 7.131e-5  
0.319, 7.172e-5  
0.318, 7.197e-5  
0.317, 7.238e-5  
0.316, 7.281e-5  
0.315, 7.326e-5  
0.314, 7.357e-5  
0.313, 7.373e-5  
0.312, 7.427e-5  
0.311, 7.467e-5  
0.310, 7.506e-5  
0.309, 7.531e-5  
0.308, 7.553e-5  
0.307, 7.585e-5  
0.306, 7.618e-5  
0.305, 7.630e-5  
0.304, 7.644e-5  
0.303, 7.697e-5  
0.302, 7.735e-5  
0.301, 7.755e-5  
0.300, 7.793e-5  
0.299, 7.841e-5  
0.298, 7.868e-5  
0.297, 7.915e-5  
0.296, 7.966e-5  
0.295, 7.995e-5  
0.294, 8.019e-5  
0.293, 8.051e-5  
0.292, 8.081e-5  
0.291, 8.113e-5  
0.290, 8.150e-5  
0.289, 8.187e-5  
0.288, 8.219e-5  
0.287, 8.267e-5  
0.286, 8.306e-5  
0.285, 8.321e-5  
0.284, 8.358e-5  
0.283, 8.380e-5  
0.282, 8.415e-5  
0.281, 8.424e-5

0.280, 8.434e-5  
0.279, 8.484e-5  
0.278, 8.507e-5  
0.277, 8.528e-5  
0.276, 8.553e-5  
0.275, 8.590e-5  
0.274, 8.633e-5  
0.273, 8.646e-5  
0.272, 8.660e-5  
0.271, 8.693e-5  
0.270, 8.747e-5  
0.269, 8.801e-5  
0.268, 8.815e-5  
0.267, 8.830e-5  
0.266, 8.846e-5  
0.265, 8.871e-5  
0.264, 8.891e-5  
0.263, 8.900e-5  
0.262, 8.931e-5  
0.261, 8.971e-5  
0.260, 9.001e-5  
0.259, 9.071e-5  
0.258, 9.104e-5  
0.257, 9.110e-5  
0.256, 9.136e-5  
0.255, 9.161e-5  
0.254, 9.180e-5  
0.253, 9.192e-5  
0.252, 9.217e-5  
0.251, 9.240e-5  
0.250, 9.262e-5  
0.249, 9.277e-5  
0.248, 9.300e-5  
0.247, 9.344e-5  
0.246, 9.388e-5  
0.245, 9.450e-5  
0.244, 9.445e-5  
0.243, 9.466e-5  
0.242, 9.462e-5  
0.241, 9.488e-5  
0.240, 9.542e-5  
0.239, 9.554e-5  
0.238, 9.547e-5  
0.237, 9.559e-5  
0.236, 9.621e-5  
0.235, 9.638e-5  
0.234, 9.674e-5  
0.233, 9.704e-5  
0.232, 9.720e-5  
0.231, 9.752e-5

0.230, 9.754e-5  
0.229, 9.751e-5  
0.228, 9.769e-5  
0.227, 9.807e-5  
0.226, 9.840e-5  
0.225, 9.859e-5  
0.224, 9.864e-5  
0.223, 9.890e-5  
0.222, 9.911e-5  
0.221, 9.932e-5  
0.220, 9.946e-5  
0.219, 9.981e-5  
0.218, 1.001e-4  
0.217, 1.002e-4  
0.216, 1.007e-4  
0.215, 1.009e-4  
0.214, 1.012e-4  
0.213, 1.015e-4  
0.212, 1.015e-4  
0.211, 1.017e-4  
0.210, 1.021e-4  
0.209, 1.024e-4  
0.208, 1.027e-4  
0.207, 1.029e-4  
0.206, 1.035e-4  
0.205, 1.040e-4  
0.204, 1.041e-4  
0.203, 1.039e-4  
0.202, 1.041e-4  
0.201, 1.043e-4  
0.200, 1.048e-4  
0.199, 1.051e-4  
0.198, 1.052e-4  
0.197, 1.054e-4  
0.196, 1.056e-4  
0.195, 1.060e-4  
0.194, 1.064e-4  
0.193, 1.065e-4  
0.192, 1.066e-4  
0.191, 1.065e-4  
0.190, 1.068e-4  
0.189, 1.071e-4  
0.188, 1.077e-4  
0.187, 1.079e-4  
0.186, 1.083e-4  
0.185, 1.084e-4  
0.184, 1.087e-4  
0.183, 1.089e-4  
0.182, 1.092e-4  
0.181, 1.098e-4

0.180, 1.102e-4  
0.179, 1.103e-4  
0.178, 1.107e-4  
0.177, 1.108e-4  
0.176, 1.108e-4  
0.175, 1.108e-4  
0.174, 1.113e-4  
0.173, 1.119e-4  
0.172, 1.121e-4  
0.171, 1.122e-4  
0.170, 1.125e-4  
0.169, 1.131e-4  
0.168, 1.135e-4  
0.167, 1.139e-4  
0.166, 1.139e-4  
0.165, 1.141e-4  
0.164, 1.143e-4  
0.163, 1.147e-4  
0.162, 1.151e-4  
0.161, 1.155e-4  
0.160, 1.156e-4  
0.159, 1.160e-4  
0.158, 1.162e-4  
0.157, 1.169e-4  
0.156, 1.174e-4  
0.155, 1.176e-4  
0.154, 1.181e-4  
0.153, 1.183e-4  
0.152, 1.185e-4  
0.151, 1.186e-4  
0.150, 1.188e-4  
0.149, 1.193e-4  
0.148, 1.197e-4  
0.147, 1.199e-4  
0.146, 1.206e-4  
0.145, 1.211e-4  
0.144, 1.212e-4  
0.143, 1.212e-4  
0.142, 1.217e-4  
0.141, 1.221e-4  
0.140, 1.223e-4  
0.139, 1.227e-4  
0.138, 1.233e-4  
0.137, 1.237e-4  
0.136, 1.239e-4  
0.135, 1.245e-4  
0.134, 1.250e-4  
0.133, 1.253e-4  
0.132, 1.257e-4  
0.131, 1.261e-4

0.130, 1.266e-4  
0.129, 1.274e-4  
0.128, 1.278e-4  
0.127, 1.283e-4  
0.126, 1.289e-4  
0.125, 1.290e-4  
0.124, 1.294e-4  
0.123, 1.298e-4  
0.122, 1.305e-4  
0.121, 1.308e-4  
0.120, 1.314e-4  
0.119, 1.319e-4  
0.118, 1.324e-4  
0.117, 1.328e-4  
0.116, 1.331e-4  
0.115, 1.335e-4  
0.114, 1.340e-4  
0.113, 1.345e-4  
0.112, 1.351e-4  
0.111, 1.356e-4  
0.110, 1.362e-4  
0.109, 1.368e-4  
0.108, 1.375e-4  
0.107, 1.381e-4  
0.106, 1.384e-4  
0.105, 1.388e-4  
0.104, 1.395e-4  
0.103, 1.402e-4  
0.102, 1.412e-4  
0.101, 1.416e-4  
0.100, 1.417e-4  
0.099, 1.422e-4  
0.098, 1.430e-4  
0.097, 1.437e-4  
0.096, 1.443e-4  
0.095, 1.444e-4  
0.094, 1.451e-4  
0.093, 1.463e-4  
0.092, 1.468e-4  
0.091, 1.475e-4  
0.090, 1.482e-4  
0.089, 1.491e-4  
0.088, 1.498e-4  
0.087, 1.503e-4  
0.086, 1.508e-4  
0.085, 1.513e-4  
0.084, 1.520e-4  
0.083, 1.528e-4  
0.082, 1.538e-4  
0.081, 1.546e-4

0.080, 1.550e-4  
0.079, 1.555e-4  
0.078, 1.561e-4  
0.077, 1.570e-4  
0.076, 1.581e-4  
0.075, 1.590e-4  
0.074, 1.599e-4  
0.073, 1.604e-4  
0.072, 1.612e-4  
0.071, 1.618e-4  
0.070, 1.622e-4  
0.069, 1.627e-4  
0.068, 1.634e-4  
0.067, 1.642e-4  
0.066, 1.653e-4  
0.065, 1.660e-4  
0.064, 1.671e-4  
0.063, 1.679e-4  
0.062, 1.684e-4  
0.061, 1.687e-4  
0.060, 1.692e-4  
0.059, 1.703e-4  
0.058, 1.713e-4  
0.057, 1.722e-4  
0.056, 1.729e-4  
0.055, 1.738e-4  
0.054, 1.749e-4  
0.053, 1.757e-4  
0.052, 1.766e-4  
0.051, 1.772e-4  
0.050, 1.775e-4  
0.049, 1.782e-4  
0.048, 1.793e-4  
0.047, 1.803e-4  
0.046, 1.813e-4  
0.045, 1.814e-4  
0.044, 1.821e-4  
0.043, 1.828e-4  
0.042, 1.837e-4  
0.041, 1.845e-4  
0.040, 1.850e-4  
0.039, 1.862e-4  
0.038, 1.871e-4  
0.037, 1.882e-4  
0.036, 1.890e-4  
0.035, 1.894e-4  
0.034, 1.898e-4  
0.033, 1.902e-4  
0.032, 1.910e-4  
0.031, 1.923e-4

0.030, 1.934e-4  
0.029, 1.939e-4  
0.028, 1.945e-4  
0.027, 1.954e-4  
0.026, 1.966e-4  
0.025, 1.974e-4  
0.024, 1.982e-4  
0.023, 1.988e-4  
0.022, 1.995e-4  
0.021, 1.999e-4  
0.020, 2.005e-4  
0.019, 2.012e-4  
0.018, 2.024e-4  
0.017, 2.033e-4  
0.016, 2.037e-4  
0.015, 2.041e-4  
0.014, 2.048e-4  
0.013, 2.055e-4  
0.012, 2.065e-4  
0.011, 2.074e-4  
0.010, 2.080e-4  
0.009, 2.087e-4  
0.008, 2.091e-4  
0.007, 2.097e-4  
0.006, 2.107e-4  
0.005, 2.114e-4  
0.004, 2.122e-4  
0.003, 2.129e-4  
0.002, 2.137e-4  
0.001, 2.139e-4  
0.000, 2.145e-4  
-0.001, 2.153e-4  
-0.002, 2.157e-4  
-0.003, 2.164e-4  
-0.004, 2.176e-4  
-0.005, 2.183e-4  
-0.006, 2.187e-4  
-0.007, 2.191e-4  
-0.008, 2.197e-4  
-0.009, 2.199e-4  
-0.010, 2.203e-4  
-0.011, 2.209e-4  
-0.012, 2.216e-4  
-0.013, 2.219e-4  
-0.014, 2.227e-4  
-0.015, 2.237e-4  
-0.016, 2.243e-4  
-0.017, 2.251e-4  
-0.018, 2.256e-4  
-0.019, 2.262e-4



-0.020, 2.269e-4  
-0.021, 2.277e-4  
-0.022, 2.280e-4  
-0.023, 2.285e-4  
-0.024, 2.293e-4  
-0.025, 2.295e-4  
-0.026, 2.299e-4  
-0.027, 2.305e-4  
-0.028, 2.308e-4  
-0.029, 2.313e-4  
-0.030, 2.322e-4  
-0.031, 2.325e-4  
-0.032, 2.329e-4  
-0.033, 2.337e-4  
-0.034, 2.344e-4  
-0.035, 2.352e-4  
-0.036, 2.361e-4  
-0.037, 2.369e-4  
-0.038, 2.370e-4  
-0.039, 2.370e-4  
-0.040, 2.377e-4  
-0.041, 2.384e-4  
-0.042, 2.390e-4  
-0.043, 2.395e-4  
-0.044, 2.404e-4  
-0.045, 2.412e-4  
-0.046, 2.413e-4  
-0.047, 2.414e-4  
-0.048, 2.421e-4  
-0.049, 2.429e-4  
-0.050, 2.428e-4  
-0.051, 2.433e-4  
-0.052, 2.438e-4  
-0.053, 2.440e-4  
-0.054, 2.446e-4  
-0.055, 2.451e-4  
-0.056, 2.454e-4  
-0.057, 2.459e-4  
-0.058, 2.465e-4  
-0.059, 2.473e-4  
-0.060, 2.479e-4  
-0.061, 2.485e-4  
-0.062, 2.489e-4  
-0.063, 2.492e-4  
-0.064, 2.495e-4  
-0.065, 2.503e-4  
-0.066, 2.507e-4  
-0.067, 2.508e-4  
-0.068, 2.516e-4  
-0.069, 2.525e-4

-0.070, 2.522e-4  
-0.071, 2.522e-4  
-0.072, 2.526e-4  
-0.073, 2.532e-4  
-0.074, 2.534e-4  
-0.075, 2.535e-4  
-0.076, 2.541e-4  
-0.077, 2.546e-4  
-0.078, 2.548e-4  
-0.079, 2.551e-4  
-0.080, 2.560e-4  
-0.081, 2.562e-4  
-0.082, 2.563e-4  
-0.083, 2.570e-4  
-0.084, 2.574e-4  
-0.085, 2.577e-4  
-0.086, 2.579e-4  
-0.087, 2.582e-4  
-0.088, 2.588e-4  
-0.089, 2.594e-4  
-0.090, 2.598e-4  
-0.091, 2.605e-4  
-0.092, 2.605e-4  
-0.093, 2.604e-4  
-0.094, 2.608e-4  
-0.095, 2.614e-4  
-0.096, 2.623e-4  
-0.097, 2.624e-4  
-0.098, 2.626e-4  
-0.099, 2.628e-4  
-0.100, 2.628e-4  
-0.101, 2.633e-4  
-0.102, 2.636e-4  
-0.103, 2.637e-4  
-0.104, 2.640e-4  
-0.105, 2.653e-4  
-0.106, 2.659e-4  
-0.107, 2.661e-4  
-0.108, 2.662e-4  
-0.109, 2.662e-4  
-0.110, 2.665e-4  
-0.111, 2.665e-4  
-0.112, 2.666e-4  
-0.113, 2.669e-4  
-0.114, 2.677e-4  
-0.115, 2.690e-4  
-0.116, 2.695e-4  
-0.117, 2.695e-4  
-0.118, 2.701e-4  
-0.119, 2.699e-4

-0.120, 2.694e-4  
-0.121, 2.694e-4  
-0.122, 2.699e-4  
-0.123, 2.702e-4  
-0.124, 2.705e-4  
-0.125, 2.705e-4  
-0.126, 2.711e-4  
-0.127, 2.713e-4  
-0.128, 2.716e-4  
-0.129, 2.721e-4  
-0.130, 2.723e-4  
-0.131, 2.729e-4  
-0.132, 2.734e-4  
-0.133, 2.737e-4  
-0.134, 2.738e-4  
-0.135, 2.739e-4  
-0.136, 2.741e-4  
-0.137, 2.741e-4  
-0.138, 2.743e-4  
-0.139, 2.750e-4  
-0.140, 2.754e-4  
-0.141, 2.755e-4  
-0.142, 2.758e-4  
-0.143, 2.758e-4  
-0.144, 2.759e-4  
-0.145, 2.765e-4  
-0.146, 2.769e-4  
-0.147, 2.772e-4  
-0.148, 2.773e-4  
-0.149, 2.776e-4  
-0.150, 2.776e-4  
-0.151, 2.774e-4  
-0.152, 2.774e-4  
-0.153, 2.773e-4  
-0.154, 2.778e-4  
-0.155, 2.785e-4  
-0.156, 2.791e-4  
-0.157, 2.791e-4  
-0.158, 2.791e-4  
-0.159, 2.794e-4  
-0.160, 2.797e-4  
-0.161, 2.800e-4  
-0.162, 2.810e-4  
-0.163, 2.814e-4  
-0.164, 2.815e-4  
-0.165, 2.821e-4  
-0.166, 2.821e-4  
-0.167, 2.817e-4  
-0.168, 2.819e-4  
-0.169, 2.816e-4

-0.170, 2.817e-4  
-0.171, 2.826e-4  
-0.172, 2.832e-4  
-0.173, 2.832e-4  
-0.174, 2.827e-4  
-0.175, 2.835e-4  
-0.176, 2.840e-4  
-0.177, 2.839e-4  
-0.178, 2.840e-4  
-0.179, 2.841e-4  
-0.180, 2.843e-4  
-0.181, 2.843e-4  
-0.182, 2.839e-4  
-0.183, 2.839e-4  
-0.184, 2.845e-4  
-0.185, 2.849e-4  
-0.186, 2.850e-4  
-0.187, 2.855e-4  
-0.188, 2.858e-4  
-0.189, 2.861e-4  
-0.190, 2.858e-4  
-0.191, 2.857e-4  
-0.192, 2.865e-4  
-0.193, 2.876e-4  
-0.194, 2.881e-4  
-0.195, 2.872e-4  
-0.196, 2.869e-4  
-0.197, 2.871e-4  
-0.198, 2.879e-4  
-0.199, 2.878e-4  
-0.200, 2.878e-4  
-0.201, 2.877e-4  
-0.202, 2.879e-4  
-0.203, 2.882e-4  
-0.204, 2.884e-4  
-0.205, 2.882e-4  
-0.206, 2.887e-4  
-0.207, 2.887e-4  
-0.208, 2.888e-4  
-0.209, 2.888e-4  
-0.210, 2.890e-4  
-0.211, 2.903e-4  
-0.212, 2.906e-4  
-0.213, 2.906e-4  
-0.214, 2.902e-4  
-0.215, 2.897e-4  
-0.216, 2.900e-4  
-0.217, 2.905e-4  
-0.218, 2.913e-4  
-0.219, 2.921e-4

-0.220, 2.921e-4  
-0.221, 2.919e-4  
-0.222, 2.921e-4  
-0.223, 2.922e-4  
-0.224, 2.923e-4  
-0.225, 2.925e-4  
-0.226, 2.925e-4  
-0.227, 2.925e-4  
-0.228, 2.926e-4  
-0.229, 2.921e-4  
-0.230, 2.927e-4  
-0.231, 2.933e-4  
-0.232, 2.934e-4  
-0.233, 2.937e-4  
-0.234, 2.937e-4  
-0.235, 2.933e-4  
-0.236, 2.937e-4  
-0.237, 2.956e-4  
-0.238, 2.970e-4  
-0.239, 2.962e-4  
-0.240, 2.957e-4  
-0.241, 2.955e-4  
-0.242, 2.953e-4  
-0.243, 2.951e-4  
-0.244, 2.956e-4  
-0.245, 2.953e-4  
-0.246, 2.954e-4  
-0.247, 2.958e-4  
-0.248, 2.960e-4  
-0.249, 2.963e-4  
-0.250, 2.969e-4  
-0.251, 2.969e-4  
-0.252, 2.968e-4  
-0.253, 2.970e-4  
-0.254, 2.967e-4  
-0.255, 2.967e-4  
-0.256, 2.975e-4  
-0.257, 2.977e-4  
-0.258, 2.982e-4  
-0.259, 2.982e-4  
-0.260, 2.990e-4  
-0.261, 2.991e-4  
-0.262, 2.991e-4  
-0.263, 3.002e-4  
-0.264, 3.005e-4  
-0.265, 3.003e-4  
-0.266, 3.002e-4  
-0.267, 3.007e-4  
-0.268, 3.014e-4  
-0.269, 3.017e-4

-0.270, 3.014e-4  
-0.271, 3.015e-4  
-0.272, 3.018e-4  
-0.273, 3.025e-4  
-0.274, 3.023e-4  
-0.275, 3.027e-4  
-0.276, 3.026e-4  
-0.277, 3.032e-4  
-0.278, 3.033e-4  
-0.279, 3.034e-4  
-0.280, 3.039e-4  
-0.281, 3.043e-4  
-0.282, 3.044e-4  
-0.283, 3.044e-4  
-0.284, 3.046e-4  
-0.285, 3.061e-4  
-0.286, 3.071e-4  
-0.287, 3.079e-4  
-0.288, 3.081e-4  
-0.289, 3.093e-4  
-0.290, 3.103e-4  
-0.291, 3.104e-4  
-0.292, 3.103e-4  
-0.293, 3.102e-4  
-0.294, 3.106e-4  
-0.295, 3.113e-4  
-0.296, 3.116e-4  
-0.297, 3.122e-4  
-0.298, 3.138e-4  
-0.299, 3.146e-4  
-0.300, 3.137e-4  
-0.301, 3.141e-4  
-0.302, 3.147e-4  
-0.303, 3.151e-4  
-0.304, 3.154e-4  
-0.305, 3.166e-4  
-0.306, 3.174e-4  
-0.307, 3.175e-4  
-0.308, 3.178e-4  
-0.309, 3.187e-4  
-0.310, 3.193e-4  
-0.311, 3.199e-4  
-0.312, 3.207e-4  
-0.313, 3.213e-4  
-0.314, 3.226e-4  
-0.315, 3.237e-4  
-0.316, 3.244e-4  
-0.317, 3.248e-4  
-0.318, 3.249e-4  
-0.319, 3.254e-4

-0.320, 3.264e-4  
-0.321, 3.272e-4  
-0.322, 3.287e-4  
-0.323, 3.301e-4  
-0.324, 3.305e-4  
-0.325, 3.302e-4  
-0.326, 3.301e-4  
-0.327, 3.306e-4  
-0.328, 3.318e-4  
-0.329, 3.320e-4  
-0.330, 3.329e-4  
-0.331, 3.343e-4  
-0.332, 3.355e-4  
-0.333, 3.359e-4  
-0.334, 3.363e-4  
-0.335, 3.375e-4  
-0.336, 3.383e-4  
-0.337, 3.376e-4  
-0.338, 3.377e-4  
-0.339, 3.394e-4  
-0.340, 3.408e-4  
-0.341, 3.421e-4  
-0.342, 3.418e-4  
-0.343, 3.414e-4  
-0.344, 3.415e-4  
-0.345, 3.424e-4  
-0.346, 3.440e-4  
-0.347, 3.450e-4  
-0.348, 3.451e-4  
-0.349, 3.445e-4  
-0.350, 3.451e-4  
-0.351, 3.474e-4  
-0.352, 3.476e-4  
-0.353, 3.485e-4  
-0.354, 3.496e-4  
-0.355, 3.496e-4  
-0.356, 3.498e-4  
-0.357, 3.504e-4  
-0.358, 3.513e-4  
-0.359, 3.528e-4  
-0.360, 3.533e-4  
-0.361, 3.534e-4  
-0.362, 3.535e-4  
-0.363, 3.543e-4  
-0.364, 3.552e-4  
-0.365, 3.555e-4  
-0.366, 3.567e-4  
-0.367, 3.586e-4  
-0.368, 3.592e-4  
-0.369, 3.595e-4

-0.370, 3.588e-4  
-0.371, 3.581e-4  
-0.372, 3.583e-4  
-0.373, 3.593e-4  
-0.374, 3.601e-4  
-0.375, 3.611e-4  
-0.376, 3.609e-4  
-0.377, 3.614e-4  
-0.378, 3.617e-4  
-0.379, 3.624e-4  
-0.380, 3.635e-4  
-0.381, 3.642e-4  
-0.382, 3.643e-4  
-0.383, 3.643e-4  
-0.384, 3.655e-4  
-0.385, 3.656e-4  
-0.386, 3.660e-4  
-0.387, 3.677e-4  
-0.388, 3.678e-4  
-0.389, 3.678e-4  
-0.390, 3.676e-4  
-0.391, 3.679e-4  
-0.392, 3.690e-4  
-0.393, 3.710e-4  
-0.394, 3.717e-4  
-0.395, 3.715e-4  
-0.396, 3.718e-4  
-0.397, 3.720e-4  
-0.398, 3.720e-4  
-0.399, 3.722e-4



**Table S2.** RDE data of compound **1** at pH=2.5 under O<sub>2</sub>. Potentials vs Ag/AgCl.

Mar. 29, 2021 04:12:38

Linear Sweep Voltammetry

File: c:\users\shadji04\desktop\sofia cv\29032021\sweep scan under oxygen ph 2.5\100 rpm.txt

Data Source: Experiment

Instrument Model: CHI650E

Header:

Note: 100 rpm

Init E (V) = 0.8

Final E (V) = -0.4

Scan Rate (V/s) = 0.025

Sample Interval (V) = 0.001

Quiet Time (sec) = 2

Sensitivity (A/V) = 0.001

Potential/V, Current/A

0.800, -4.278e-5

0.799, -4.229e-5

0.798, -4.184e-5

0.797, -4.146e-5

0.796, -4.108e-5

0.795, -4.074e-5

0.794, -4.042e-5

0.793, -4.010e-5

0.792, -3.980e-5

0.791, -3.951e-5

0.790, -3.920e-5

0.789, -3.890e-5

0.788, -3.866e-5

0.787, -3.838e-5

0.786, -3.816e-5

0.785, -3.793e-5

0.784, -3.770e-5

0.783, -3.742e-5

0.782, -3.723e-5

0.781, -3.696e-5

0.780, -3.672e-5

0.779, -3.650e-5

0.778, -3.627e-5

0.777, -3.604e-5

0.776, -3.585e-5

0.775, -3.559e-5

0.774, -3.539e-5

0.773, -3.518e-5

0.772, -3.496e-5

0.771, -3.475e-5

0.770, -3.454e-5

0.769, -3.433e-5

0.768, -3.411e-5  
0.767, -3.392e-5  
0.766, -3.373e-5  
0.765, -3.356e-5  
0.764, -3.334e-5  
0.763, -3.317e-5  
0.762, -3.296e-5  
0.761, -3.277e-5  
0.760, -3.255e-5  
0.759, -3.237e-5  
0.758, -3.219e-5  
0.757, -3.198e-5  
0.756, -3.180e-5  
0.755, -3.163e-5  
0.754, -3.142e-5  
0.753, -3.123e-5  
0.752, -3.106e-5  
0.751, -3.085e-5  
0.750, -3.070e-5  
0.749, -3.049e-5  
0.748, -3.034e-5  
0.747, -3.015e-5  
0.746, -2.996e-5  
0.745, -2.978e-5  
0.744, -2.961e-5  
0.743, -2.943e-5  
0.742, -2.925e-5  
0.741, -2.907e-5  
0.740, -2.890e-5  
0.739, -2.868e-5  
0.738, -2.853e-5  
0.737, -2.836e-5  
0.736, -2.819e-5  
0.735, -2.801e-5  
0.734, -2.783e-5  
0.733, -2.769e-5  
0.732, -2.752e-5  
0.731, -2.734e-5  
0.730, -2.714e-5  
0.729, -2.699e-5  
0.728, -2.682e-5  
0.727, -2.664e-5  
0.726, -2.647e-5  
0.725, -2.630e-5  
0.724, -2.611e-5  
0.723, -2.596e-5  
0.722, -2.577e-5  
0.721, -2.559e-5  
0.720, -2.543e-5  
0.719, -2.526e-5

0.718, -2.512e-5  
0.717, -2.496e-5  
0.716, -2.477e-5  
0.715, -2.458e-5  
0.714, -2.445e-5  
0.713, -2.427e-5  
0.712, -2.410e-5  
0.711, -2.395e-5  
0.710, -2.380e-5  
0.709, -2.363e-5  
0.708, -2.350e-5  
0.707, -2.333e-5  
0.706, -2.317e-5  
0.705, -2.299e-5  
0.704, -2.285e-5  
0.703, -2.268e-5  
0.702, -2.254e-5  
0.701, -2.236e-5  
0.700, -2.222e-5  
0.699, -2.208e-5  
0.698, -2.189e-5  
0.697, -2.173e-5  
0.696, -2.161e-5  
0.695, -2.146e-5  
0.694, -2.129e-5  
0.693, -2.118e-5  
0.692, -2.100e-5  
0.691, -2.086e-5  
0.690, -2.073e-5  
0.689, -2.061e-5  
0.688, -2.046e-5  
0.687, -2.033e-5  
0.686, -2.018e-5  
0.685, -2.002e-5  
0.684, -1.987e-5  
0.683, -1.975e-5  
0.682, -1.962e-5  
0.681, -1.948e-5  
0.680, -1.933e-5  
0.679, -1.918e-5  
0.678, -1.907e-5  
0.677, -1.893e-5  
0.676, -1.884e-5  
0.675, -1.870e-5  
0.674, -1.860e-5  
0.673, -1.847e-5  
0.672, -1.831e-5  
0.671, -1.819e-5  
0.670, -1.808e-5  
0.669, -1.795e-5

0.668, -1.783e-5  
0.667, -1.770e-5  
0.666, -1.759e-5  
0.665, -1.748e-5  
0.664, -1.737e-5  
0.663, -1.724e-5  
0.662, -1.712e-5  
0.661, -1.699e-5  
0.660, -1.688e-5  
0.659, -1.679e-5  
0.658, -1.670e-5  
0.657, -1.660e-5  
0.656, -1.648e-5  
0.655, -1.639e-5  
0.654, -1.627e-5  
0.653, -1.617e-5  
0.652, -1.606e-5  
0.651, -1.596e-5  
0.650, -1.586e-5  
0.649, -1.577e-5  
0.648, -1.566e-5  
0.647, -1.556e-5  
0.646, -1.545e-5  
0.645, -1.536e-5  
0.644, -1.526e-5  
0.643, -1.516e-5  
0.642, -1.506e-5  
0.641, -1.495e-5  
0.640, -1.485e-5  
0.639, -1.474e-5  
0.638, -1.465e-5  
0.637, -1.456e-5  
0.636, -1.444e-5  
0.635, -1.434e-5  
0.634, -1.426e-5  
0.633, -1.415e-5  
0.632, -1.405e-5  
0.631, -1.395e-5  
0.630, -1.388e-5  
0.629, -1.377e-5  
0.628, -1.367e-5  
0.627, -1.357e-5  
0.626, -1.348e-5  
0.625, -1.339e-5  
0.624, -1.330e-5  
0.623, -1.320e-5  
0.622, -1.311e-5  
0.621, -1.300e-5  
0.620, -1.290e-5  
0.619, -1.282e-5

0.618, -1.271e-5  
0.617, -1.263e-5  
0.616, -1.250e-5  
0.615, -1.243e-5  
0.614, -1.235e-5  
0.613, -1.224e-5  
0.612, -1.213e-5  
0.611, -1.204e-5  
0.610, -1.196e-5  
0.609, -1.185e-5  
0.608, -1.178e-5  
0.607, -1.170e-5  
0.606, -1.160e-5  
0.605, -1.150e-5  
0.604, -1.139e-5  
0.603, -1.130e-5  
0.602, -1.123e-5  
0.601, -1.114e-5  
0.600, -1.105e-5  
0.599, -1.095e-5  
0.598, -1.086e-5  
0.597, -1.076e-5  
0.596, -1.067e-5  
0.595, -1.056e-5  
0.594, -1.045e-5  
0.593, -1.036e-5  
0.592, -1.026e-5  
0.591, -1.015e-5  
0.590, -1.005e-5  
0.589, -9.920e-6  
0.588, -9.829e-6  
0.587, -9.747e-6  
0.586, -9.635e-6  
0.585, -9.528e-6  
0.584, -9.415e-6  
0.583, -9.319e-6  
0.582, -9.205e-6  
0.581, -9.121e-6  
0.580, -9.012e-6  
0.579, -8.909e-6  
0.578, -8.799e-6  
0.577, -8.707e-6  
0.576, -8.594e-6  
0.575, -8.488e-6  
0.574, -8.372e-6  
0.573, -8.242e-6  
0.572, -8.129e-6  
0.571, -8.017e-6  
0.570, -7.893e-6  
0.569, -7.774e-6

0.568, -7.643e-6  
0.567, -7.517e-6  
0.566, -7.412e-6  
0.565, -7.276e-6  
0.564, -7.150e-6  
0.563, -7.034e-6  
0.562, -6.920e-6  
0.561, -6.789e-6  
0.560, -6.655e-6  
0.559, -6.510e-6  
0.558, -6.377e-6  
0.557, -6.250e-6  
0.556, -6.127e-6  
0.555, -6.012e-6  
0.554, -5.876e-6  
0.553, -5.737e-6  
0.552, -5.594e-6  
0.551, -5.448e-6  
0.550, -5.302e-6  
0.549, -5.143e-6  
0.548, -5.023e-6  
0.547, -4.886e-6  
0.546, -4.734e-6  
0.545, -4.571e-6  
0.544, -4.426e-6  
0.543, -4.274e-6  
0.542, -4.114e-6  
0.541, -3.971e-6  
0.540, -3.823e-6  
0.539, -3.681e-6  
0.538, -3.518e-6  
0.537, -3.364e-6  
0.536, -3.205e-6  
0.535, -3.027e-6  
0.534, -2.866e-6  
0.533, -2.686e-6  
0.532, -2.526e-6  
0.531, -2.363e-6  
0.530, -2.204e-6  
0.529, -2.015e-6  
0.528, -1.841e-6  
0.527, -1.679e-6  
0.526, -1.491e-6  
0.525, -1.331e-6  
0.524, -1.175e-6  
0.523, -1.006e-6  
0.522, -8.258e-7  
0.521, -6.470e-7  
0.520, -4.653e-7  
0.519, -2.668e-7

0.518, -8.704e-8  
0.517, 8.881e-8  
0.516, 2.735e-7  
0.515, 4.552e-7  
0.514, 6.773e-7  
0.513, 8.620e-7  
0.512, 1.057e-6  
0.511, 1.270e-6  
0.510, 1.470e-6  
0.509, 1.647e-6  
0.508, 1.837e-6  
0.507, 2.043e-6  
0.506, 2.269e-6  
0.505, 2.472e-6  
0.504, 2.684e-6  
0.503, 2.924e-6  
0.502, 3.109e-6  
0.501, 3.330e-6  
0.500, 3.534e-6  
0.499, 3.743e-6  
0.498, 3.993e-6  
0.497, 4.206e-6  
0.496, 4.416e-6  
0.495, 4.657e-6  
0.494, 4.890e-6  
0.493, 5.121e-6  
0.492, 5.370e-6  
0.491, 5.604e-6  
0.490, 5.831e-6  
0.489, 6.074e-6  
0.488, 6.309e-6  
0.487, 6.536e-6  
0.486, 6.788e-6  
0.485, 7.015e-6  
0.484, 7.266e-6  
0.483, 7.496e-6  
0.482, 7.748e-6  
0.481, 8.003e-6  
0.480, 8.277e-6  
0.479, 8.511e-6  
0.478, 8.765e-6  
0.477, 9.037e-6  
0.476, 9.274e-6  
0.475, 9.526e-6  
0.474, 9.793e-6  
0.473, 1.000e-5  
0.472, 1.023e-5  
0.471, 1.055e-5  
0.470, 1.076e-5  
0.469, 1.104e-5

0.468, 1.127e-5  
0.467, 1.153e-5  
0.466, 1.177e-5  
0.465, 1.201e-5  
0.464, 1.222e-5  
0.463, 1.250e-5  
0.462, 1.276e-5  
0.461, 1.300e-5  
0.460, 1.326e-5  
0.459, 1.350e-5  
0.458, 1.369e-5  
0.457, 1.393e-5  
0.456, 1.418e-5  
0.455, 1.437e-5  
0.454, 1.460e-5  
0.453, 1.480e-5  
0.452, 1.507e-5  
0.451, 1.526e-5  
0.450, 1.545e-5  
0.449, 1.564e-5  
0.448, 1.590e-5  
0.447, 1.610e-5  
0.446, 1.629e-5  
0.445, 1.648e-5  
0.444, 1.670e-5  
0.443, 1.684e-5  
0.442, 1.709e-5  
0.441, 1.728e-5  
0.440, 1.742e-5  
0.439, 1.761e-5  
0.438, 1.779e-5  
0.437, 1.799e-5  
0.436, 1.819e-5  
0.435, 1.832e-5  
0.434, 1.848e-5  
0.433, 1.871e-5  
0.432, 1.886e-5  
0.431, 1.905e-5  
0.430, 1.918e-5  
0.429, 1.932e-5  
0.428, 1.945e-5  
0.427, 1.967e-5  
0.426, 1.980e-5  
0.425, 1.993e-5  
0.424, 2.008e-5  
0.423, 2.027e-5  
0.422, 2.041e-5  
0.421, 2.058e-5  
0.420, 2.068e-5  
0.419, 2.085e-5



0.418, 2.106e-5  
0.417, 2.118e-5  
0.416, 2.133e-5  
0.415, 2.149e-5  
0.414, 2.161e-5  
0.413, 2.171e-5  
0.412, 2.193e-5  
0.411, 2.202e-5  
0.410, 2.221e-5  
0.409, 2.235e-5  
0.408, 2.253e-5  
0.407, 2.266e-5  
0.406, 2.281e-5  
0.405, 2.294e-5  
0.404, 2.314e-5  
0.403, 2.335e-5  
0.402, 2.350e-5  
0.401, 2.367e-5  
0.400, 2.386e-5  
0.399, 2.399e-5  
0.398, 2.415e-5  
0.397, 2.439e-5  
0.396, 2.449e-5  
0.395, 2.471e-5  
0.394, 2.484e-5  
0.393, 2.511e-5  
0.392, 2.525e-5  
0.391, 2.543e-5  
0.390, 2.560e-5  
0.389, 2.584e-5  
0.388, 2.607e-5  
0.387, 2.624e-5  
0.386, 2.645e-5  
0.385, 2.666e-5  
0.384, 2.681e-5  
0.383, 2.706e-5  
0.382, 2.729e-5  
0.381, 2.743e-5  
0.380, 2.770e-5  
0.379, 2.788e-5  
0.378, 2.817e-5  
0.377, 2.836e-5  
0.376, 2.853e-5  
0.375, 2.870e-5  
0.374, 2.903e-5  
0.373, 2.925e-5  
0.372, 2.950e-5  
0.371, 2.970e-5  
0.370, 2.993e-5  
0.369, 3.010e-5

0.368, 3.038e-5  
0.367, 3.062e-5  
0.366, 3.080e-5  
0.365, 3.105e-5  
0.364, 3.130e-5  
0.363, 3.155e-5  
0.362, 3.178e-5  
0.361, 3.194e-5  
0.360, 3.213e-5  
0.359, 3.250e-5  
0.358, 3.268e-5  
0.357, 3.293e-5  
0.356, 3.316e-5  
0.355, 3.335e-5  
0.354, 3.350e-5  
0.353, 3.381e-5  
0.352, 3.399e-5  
0.351, 3.422e-5  
0.350, 3.444e-5  
0.349, 3.466e-5  
0.348, 3.487e-5  
0.347, 3.509e-5  
0.346, 3.519e-5  
0.345, 3.541e-5  
0.344, 3.571e-5  
0.343, 3.587e-5  
0.342, 3.606e-5  
0.341, 3.631e-5  
0.340, 3.646e-5  
0.339, 3.659e-5  
0.338, 3.689e-5  
0.337, 3.698e-5  
0.336, 3.720e-5  
0.335, 3.737e-5  
0.334, 3.762e-5  
0.333, 3.777e-5  
0.332, 3.791e-5  
0.331, 3.802e-5  
0.330, 3.825e-5  
0.329, 3.849e-5  
0.328, 3.865e-5  
0.327, 3.882e-5  
0.326, 3.901e-5  
0.325, 3.911e-5  
0.324, 3.931e-5  
0.323, 3.950e-5  
0.322, 3.961e-5  
0.321, 3.982e-5  
0.320, 3.992e-5  
0.319, 4.015e-5

0.318, 4.027e-5  
0.317, 4.039e-5  
0.316, 4.051e-5  
0.315, 4.074e-5  
0.314, 4.092e-5  
0.313, 4.109e-5  
0.312, 4.121e-5  
0.311, 4.139e-5  
0.310, 4.147e-5  
0.309, 4.169e-5  
0.308, 4.185e-5  
0.307, 4.196e-5  
0.306, 4.215e-5  
0.305, 4.228e-5  
0.304, 4.247e-5  
0.303, 4.260e-5  
0.302, 4.272e-5  
0.301, 4.283e-5  
0.300, 4.308e-5  
0.299, 4.323e-5  
0.298, 4.341e-5  
0.297, 4.356e-5  
0.296, 4.373e-5  
0.295, 4.383e-5  
0.294, 4.408e-5  
0.293, 4.425e-5  
0.292, 4.435e-5  
0.291, 4.452e-5  
0.290, 4.469e-5  
0.289, 4.490e-5  
0.288, 4.509e-5  
0.287, 4.519e-5  
0.286, 4.535e-5  
0.285, 4.560e-5  
0.284, 4.575e-5  
0.283, 4.594e-5  
0.282, 4.614e-5  
0.281, 4.631e-5  
0.280, 4.642e-5  
0.279, 4.670e-5  
0.278, 4.685e-5  
0.277, 4.703e-5  
0.276, 4.724e-5  
0.275, 4.741e-5  
0.274, 4.758e-5  
0.273, 4.778e-5  
0.272, 4.791e-5  
0.271, 4.812e-5  
0.270, 4.837e-5  
0.269, 4.854e-5

0.268, 4.877e-5  
0.267, 4.900e-5  
0.266, 4.915e-5  
0.265, 4.931e-5  
0.264, 4.958e-5  
0.263, 4.973e-5  
0.262, 4.998e-5  
0.261, 5.018e-5  
0.260, 5.044e-5  
0.259, 5.061e-5  
0.258, 5.081e-5  
0.257, 5.099e-5  
0.256, 5.124e-5  
0.255, 5.152e-5  
0.254, 5.170e-5  
0.253, 5.194e-5  
0.252, 5.218e-5  
0.251, 5.233e-5  
0.250, 5.258e-5  
0.249, 5.286e-5  
0.248, 5.300e-5  
0.247, 5.330e-5  
0.246, 5.347e-5  
0.245, 5.381e-5  
0.244, 5.401e-5  
0.243, 5.420e-5  
0.242, 5.443e-5  
0.241, 5.474e-5  
0.240, 5.501e-5  
0.239, 5.528e-5  
0.238, 5.551e-5  
0.237, 5.579e-5  
0.236, 5.598e-5  
0.235, 5.630e-5  
0.234, 5.656e-5  
0.233, 5.675e-5  
0.232, 5.704e-5  
0.231, 5.729e-5  
0.230, 5.763e-5  
0.229, 5.790e-5  
0.228, 5.811e-5  
0.227, 5.831e-5  
0.226, 5.874e-5  
0.225, 5.901e-5  
0.224, 5.931e-5  
0.223, 5.959e-5  
0.222, 5.989e-5  
0.221, 6.012e-5  
0.220, 6.050e-5  
0.219, 6.079e-5

0.218, 6.101e-5  
0.217, 6.130e-5  
0.216, 6.159e-5  
0.215, 6.191e-5  
0.214, 6.224e-5  
0.213, 6.247e-5  
0.212, 6.277e-5  
0.211, 6.325e-5  
0.210, 6.354e-5  
0.209, 6.390e-5  
0.208, 6.426e-5  
0.207, 6.459e-5  
0.206, 6.483e-5  
0.205, 6.528e-5  
0.204, 6.559e-5  
0.203, 6.589e-5  
0.202, 6.624e-5  
0.201, 6.660e-5  
0.200, 6.694e-5  
0.199, 6.734e-5  
0.198, 6.759e-5  
0.197, 6.799e-5  
0.196, 6.848e-5  
0.195, 6.880e-5  
0.194, 6.920e-5  
0.193, 6.962e-5  
0.192, 6.995e-5  
0.191, 7.027e-5  
0.190, 7.081e-5  
0.189, 7.110e-5  
0.188, 7.152e-5  
0.187, 7.189e-5  
0.186, 7.240e-5  
0.185, 7.279e-5  
0.184, 7.317e-5  
0.183, 7.353e-5  
0.182, 7.401e-5  
0.181, 7.457e-5  
0.180, 7.500e-5  
0.179, 7.548e-5  
0.178, 7.598e-5  
0.177, 7.630e-5  
0.176, 7.676e-5  
0.175, 7.734e-5  
0.174, 7.765e-5  
0.173, 7.824e-5  
0.172, 7.862e-5  
0.171, 7.929e-5  
0.170, 7.974e-5  
0.169, 8.019e-5

0.168, 8.064e-5  
0.167, 8.125e-5  
0.166, 8.189e-5  
0.165, 8.244e-5  
0.164, 8.299e-5  
0.163, 8.360e-5  
0.162, 8.399e-5  
0.161, 8.466e-5  
0.160, 8.532e-5  
0.159, 8.573e-5  
0.158, 8.645e-5  
0.157, 8.699e-5  
0.156, 8.773e-5  
0.155, 8.832e-5  
0.154, 8.886e-5  
0.153, 8.934e-5  
0.152, 9.017e-5  
0.151, 9.088e-5  
0.150, 9.161e-5  
0.149, 9.220e-5  
0.148, 9.291e-5  
0.147, 9.337e-5  
0.146, 9.422e-5  
0.145, 9.496e-5  
0.144, 9.544e-5  
0.143, 9.622e-5  
0.142, 9.687e-5  
0.141, 9.772e-5  
0.140, 9.847e-5  
0.139, 9.899e-5  
0.138, 9.955e-5  
0.137, 1.006e-4  
0.136, 1.012e-4  
0.135, 1.020e-4  
0.134, 1.027e-4  
0.133, 1.034e-4  
0.132, 1.038e-4  
0.131, 1.048e-4  
0.130, 1.054e-4  
0.129, 1.060e-4  
0.128, 1.067e-4  
0.127, 1.074e-4  
0.126, 1.081e-4  
0.125, 1.089e-4  
0.124, 1.093e-4  
0.123, 1.100e-4  
0.122, 1.110e-4  
0.121, 1.115e-4  
0.120, 1.122e-4  
0.119, 1.129e-4

0.118, 1.134e-4  
0.117, 1.137e-4  
0.116, 1.147e-4  
0.115, 1.151e-4  
0.114, 1.158e-4  
0.113, 1.162e-4  
0.112, 1.170e-4  
0.111, 1.175e-4  
0.110, 1.180e-4  
0.109, 1.184e-4  
0.108, 1.189e-4  
0.107, 1.197e-4  
0.106, 1.201e-4  
0.105, 1.207e-4  
0.104, 1.213e-4  
0.103, 1.215e-4  
0.102, 1.220e-4  
0.101, 1.228e-4  
0.100, 1.229e-4  
0.099, 1.236e-4  
0.098, 1.238e-4  
0.097, 1.246e-4  
0.096, 1.250e-4  
0.095, 1.253e-4  
0.094, 1.255e-4  
0.093, 1.262e-4  
0.092, 1.269e-4  
0.091, 1.273e-4  
0.090, 1.277e-4  
0.089, 1.282e-4  
0.088, 1.283e-4  
0.087, 1.289e-4  
0.086, 1.293e-4  
0.085, 1.294e-4  
0.084, 1.299e-4  
0.083, 1.302e-4  
0.082, 1.308e-4  
0.081, 1.311e-4  
0.080, 1.312e-4  
0.079, 1.313e-4  
0.078, 1.322e-4  
0.077, 1.326e-4  
0.076, 1.331e-4  
0.075, 1.333e-4  
0.074, 1.338e-4  
0.073, 1.338e-4  
0.072, 1.344e-4  
0.071, 1.348e-4  
0.070, 1.349e-4  
0.069, 1.353e-4

0.068, 1.355e-4  
0.067, 1.359e-4  
0.066, 1.363e-4  
0.065, 1.364e-4  
0.064, 1.365e-4  
0.063, 1.373e-4  
0.062, 1.376e-4  
0.061, 1.380e-4  
0.060, 1.383e-4  
0.059, 1.386e-4  
0.058, 1.386e-4  
0.057, 1.393e-4  
0.056, 1.395e-4  
0.055, 1.397e-4  
0.054, 1.400e-4  
0.053, 1.403e-4  
0.052, 1.406e-4  
0.051, 1.409e-4  
0.050, 1.409e-4  
0.049, 1.413e-4  
0.048, 1.419e-4  
0.047, 1.421e-4  
0.046, 1.425e-4  
0.045, 1.429e-4  
0.044, 1.430e-4  
0.043, 1.432e-4  
0.042, 1.438e-4  
0.041, 1.438e-4  
0.040, 1.442e-4  
0.039, 1.443e-4  
0.038, 1.448e-4  
0.037, 1.450e-4  
0.036, 1.452e-4  
0.035, 1.454e-4  
0.034, 1.457e-4  
0.033, 1.462e-4  
0.032, 1.464e-4  
0.031, 1.468e-4  
0.030, 1.472e-4  
0.029, 1.471e-4  
0.028, 1.476e-4  
0.027, 1.479e-4  
0.026, 1.479e-4  
0.025, 1.484e-4  
0.024, 1.484e-4  
0.023, 1.489e-4  
0.022, 1.490e-4  
0.021, 1.492e-4  
0.020, 1.493e-4  
0.019, 1.498e-4



0.018, 1.501e-4  
0.017, 1.505e-4  
0.016, 1.507e-4  
0.015, 1.510e-4  
0.014, 1.510e-4  
0.013, 1.515e-4  
0.012, 1.518e-4  
0.011, 1.518e-4  
0.010, 1.521e-4  
0.009, 1.522e-4  
0.008, 1.526e-4  
0.007, 1.529e-4  
0.006, 1.530e-4  
0.005, 1.530e-4  
0.004, 1.536e-4  
0.003, 1.538e-4  
0.002, 1.541e-4  
0.001, 1.543e-4  
0.000, 1.546e-4  
-0.001, 1.546e-4  
-0.002, 1.551e-4  
-0.003, 1.552e-4  
-0.004, 1.554e-4  
-0.005, 1.556e-4  
-0.006, 1.559e-4  
-0.007, 1.561e-4  
-0.008, 1.564e-4  
-0.009, 1.564e-4  
-0.010, 1.567e-4  
-0.011, 1.572e-4  
-0.012, 1.574e-4  
-0.013, 1.576e-4  
-0.014, 1.579e-4  
-0.015, 1.580e-4  
-0.016, 1.581e-4  
-0.017, 1.586e-4  
-0.018, 1.586e-4  
-0.019, 1.588e-4  
-0.020, 1.590e-4  
-0.021, 1.593e-4  
-0.022, 1.595e-4  
-0.023, 1.596e-4  
-0.024, 1.598e-4  
-0.025, 1.601e-4  
-0.026, 1.606e-4  
-0.027, 1.607e-4  
-0.028, 1.609e-4  
-0.029, 1.612e-4  
-0.030, 1.612e-4  
-0.031, 1.615e-4

-0.032, 1.618e-4  
-0.033, 1.618e-4  
-0.034, 1.622e-4  
-0.035, 1.621e-4  
-0.036, 1.626e-4  
-0.037, 1.626e-4  
-0.038, 1.628e-4  
-0.039, 1.629e-4  
-0.040, 1.632e-4  
-0.041, 1.636e-4  
-0.042, 1.638e-4  
-0.043, 1.640e-4  
-0.044, 1.642e-4  
-0.045, 1.643e-4  
-0.046, 1.646e-4  
-0.047, 1.648e-4  
-0.048, 1.648e-4  
-0.049, 1.651e-4  
-0.050, 1.652e-4  
-0.051, 1.655e-4  
-0.052, 1.657e-4  
-0.053, 1.657e-4  
-0.054, 1.658e-4  
-0.055, 1.663e-4  
-0.056, 1.665e-4  
-0.057, 1.668e-4  
-0.058, 1.669e-4  
-0.059, 1.672e-4  
-0.060, 1.672e-4  
-0.061, 1.676e-4  
-0.062, 1.677e-4  
-0.063, 1.678e-4  
-0.064, 1.680e-4  
-0.065, 1.681e-4  
-0.066, 1.683e-4  
-0.067, 1.685e-4  
-0.068, 1.685e-4  
-0.069, 1.686e-4  
-0.070, 1.691e-4  
-0.071, 1.692e-4  
-0.072, 1.695e-4  
-0.073, 1.696e-4  
-0.074, 1.698e-4  
-0.075, 1.698e-4  
-0.076, 1.703e-4  
-0.077, 1.703e-4  
-0.078, 1.704e-4  
-0.079, 1.705e-4  
-0.080, 1.707e-4  
-0.081, 1.708e-4

-0.082, 1.710e-4  
-0.083, 1.710e-4  
-0.084, 1.712e-4  
-0.085, 1.716e-4  
-0.086, 1.717e-4  
-0.087, 1.719e-4  
-0.088, 1.722e-4  
-0.089, 1.722e-4  
-0.090, 1.723e-4  
-0.091, 1.727e-4  
-0.092, 1.726e-4  
-0.093, 1.729e-4  
-0.094, 1.729e-4  
-0.095, 1.731e-4  
-0.096, 1.732e-4  
-0.097, 1.733e-4  
-0.098, 1.734e-4  
-0.099, 1.736e-4  
-0.100, 1.739e-4  
-0.101, 1.740e-4  
-0.102, 1.742e-4  
-0.103, 1.744e-4  
-0.104, 1.743e-4  
-0.105, 1.746e-4  
-0.106, 1.749e-4  
-0.107, 1.747e-4  
-0.108, 1.751e-4  
-0.109, 1.749e-4  
-0.110, 1.753e-4  
-0.111, 1.753e-4  
-0.112, 1.753e-4  
-0.113, 1.755e-4  
-0.114, 1.757e-4  
-0.115, 1.759e-4  
-0.116, 1.760e-4  
-0.117, 1.761e-4  
-0.118, 1.763e-4  
-0.119, 1.762e-4  
-0.120, 1.767e-4  
-0.121, 1.767e-4  
-0.122, 1.767e-4  
-0.123, 1.769e-4  
-0.124, 1.769e-4  
-0.125, 1.771e-4  
-0.126, 1.773e-4  
-0.127, 1.773e-4  
-0.128, 1.772e-4  
-0.129, 1.777e-4  
-0.130, 1.778e-4  
-0.131, 1.780e-4

-0.132, 1.780e-4  
-0.133, 1.781e-4  
-0.134, 1.781e-4  
-0.135, 1.784e-4  
-0.136, 1.785e-4  
-0.137, 1.785e-4  
-0.138, 1.785e-4  
-0.139, 1.787e-4  
-0.140, 1.787e-4  
-0.141, 1.789e-4  
-0.142, 1.788e-4  
-0.143, 1.789e-4  
-0.144, 1.795e-4  
-0.145, 1.794e-4  
-0.146, 1.796e-4  
-0.147, 1.797e-4  
-0.148, 1.797e-4  
-0.149, 1.797e-4  
-0.150, 1.801e-4  
-0.151, 1.800e-4  
-0.152, 1.801e-4  
-0.153, 1.801e-4  
-0.154, 1.803e-4  
-0.155, 1.802e-4  
-0.156, 1.804e-4  
-0.157, 1.803e-4  
-0.158, 1.806e-4  
-0.159, 1.809e-4  
-0.160, 1.808e-4  
-0.161, 1.810e-4  
-0.162, 1.813e-4  
-0.163, 1.811e-4  
-0.164, 1.813e-4  
-0.165, 1.816e-4  
-0.166, 1.813e-4  
-0.167, 1.817e-4  
-0.168, 1.814e-4  
-0.169, 1.818e-4  
-0.170, 1.817e-4  
-0.171, 1.816e-4  
-0.172, 1.818e-4  
-0.173, 1.820e-4  
-0.174, 1.822e-4  
-0.175, 1.822e-4  
-0.176, 1.823e-4  
-0.177, 1.826e-4  
-0.178, 1.822e-4  
-0.179, 1.827e-4  
-0.180, 1.828e-4  
-0.181, 1.825e-4

-0.182, 1.830e-4  
-0.183, 1.826e-4  
-0.184, 1.831e-4  
-0.185, 1.829e-4  
-0.186, 1.828e-4  
-0.187, 1.829e-4  
-0.188, 1.833e-4  
-0.189, 1.833e-4  
-0.190, 1.835e-4  
-0.191, 1.834e-4  
-0.192, 1.836e-4  
-0.193, 1.834e-4  
-0.194, 1.840e-4  
-0.195, 1.838e-4  
-0.196, 1.837e-4  
-0.197, 1.838e-4  
-0.198, 1.839e-4  
-0.199, 1.839e-4  
-0.200, 1.840e-4  
-0.201, 1.838e-4  
-0.202, 1.836e-4  
-0.203, 1.845e-4  
-0.204, 1.842e-4  
-0.205, 1.845e-4  
-0.206, 1.843e-4  
-0.207, 1.844e-4  
-0.208, 1.843e-4  
-0.209, 1.848e-4  
-0.210, 1.846e-4  
-0.211, 1.846e-4  
-0.212, 1.845e-4  
-0.213, 1.848e-4  
-0.214, 1.845e-4  
-0.215, 1.848e-4  
-0.216, 1.845e-4  
-0.217, 1.846e-4  
-0.218, 1.853e-4  
-0.219, 1.848e-4  
-0.220, 1.850e-4  
-0.221, 1.851e-4  
-0.222, 1.849e-4  
-0.223, 1.848e-4  
-0.224, 1.854e-4  
-0.225, 1.849e-4  
-0.226, 1.852e-4  
-0.227, 1.850e-4  
-0.228, 1.853e-4  
-0.229, 1.850e-4  
-0.230, 1.851e-4  
-0.231, 1.848e-4

-0.232, 1.854e-4  
-0.233, 1.856e-4  
-0.234, 1.852e-4  
-0.235, 1.853e-4  
-0.236, 1.856e-4  
-0.237, 1.851e-4  
-0.238, 1.852e-4  
-0.239, 1.856e-4  
-0.240, 1.848e-4  
-0.241, 1.855e-4  
-0.242, 1.849e-4  
-0.243, 1.856e-4  
-0.244, 1.851e-4  
-0.245, 1.849e-4  
-0.246, 1.852e-4  
-0.247, 1.854e-4  
-0.248, 1.854e-4  
-0.249, 1.853e-4  
-0.250, 1.853e-4  
-0.251, 1.855e-4  
-0.252, 1.849e-4  
-0.253, 1.855e-4  
-0.254, 1.854e-4  
-0.255, 1.847e-4  
-0.256, 1.855e-4  
-0.257, 1.846e-4  
-0.258, 1.854e-4  
-0.259, 1.849e-4  
-0.260, 1.846e-4  
-0.261, 1.847e-4  
-0.262, 1.852e-4  
-0.263, 1.850e-4  
-0.264, 1.853e-4  
-0.265, 1.850e-4  
-0.266, 1.850e-4  
-0.267, 1.847e-4  
-0.268, 1.855e-4  
-0.269, 1.850e-4  
-0.270, 1.847e-4  
-0.271, 1.848e-4  
-0.272, 1.847e-4  
-0.273, 1.848e-4  
-0.274, 1.848e-4  
-0.275, 1.844e-4  
-0.276, 1.840e-4  
-0.277, 1.854e-4  
-0.278, 1.848e-4  
-0.279, 1.853e-4  
-0.280, 1.849e-4  
-0.281, 1.850e-4

-0.282, 1.848e-4  
-0.283, 1.855e-4  
-0.284, 1.853e-4  
-0.285, 1.852e-4  
-0.286, 1.853e-4  
-0.287, 1.855e-4  
-0.288, 1.853e-4  
-0.289, 1.858e-4  
-0.290, 1.855e-4  
-0.291, 1.855e-4  
-0.292, 1.871e-4  
-0.293, 1.866e-4  
-0.294, 1.871e-4  
-0.295, 1.874e-4  
-0.296, 1.875e-4  
-0.297, 1.873e-4  
-0.298, 1.886e-4  
-0.299, 1.884e-4  
-0.300, 1.887e-4  
-0.301, 1.891e-4  
-0.302, 1.898e-4  
-0.303, 1.898e-4  
-0.304, 1.906e-4  
-0.305, 1.904e-4  
-0.306, 1.914e-4  
-0.307, 1.931e-4  
-0.308, 1.931e-4  
-0.309, 1.940e-4  
-0.310, 1.950e-4  
-0.311, 1.951e-4  
-0.312, 1.952e-4  
-0.313, 1.972e-4  
-0.314, 1.969e-4  
-0.315, 1.981e-4  
-0.316, 1.986e-4  
-0.317, 2.001e-4  
-0.318, 2.003e-4  
-0.319, 2.009e-4  
-0.320, 2.015e-4  
-0.321, 2.027e-4  
-0.322, 2.050e-4  
-0.323, 2.052e-4  
-0.324, 2.064e-4  
-0.325, 2.077e-4  
-0.326, 2.074e-4  
-0.327, 2.083e-4  
-0.328, 2.103e-4  
-0.329, 2.095e-4  
-0.330, 2.118e-4  
-0.331, 2.113e-4

-0.332, 2.143e-4  
-0.333, 2.138e-4  
-0.334, 2.142e-4  
-0.335, 2.151e-4  
-0.336, 2.164e-4  
-0.337, 2.185e-4  
-0.338, 2.190e-4  
-0.339, 2.196e-4  
-0.340, 2.208e-4  
-0.341, 2.199e-4  
-0.342, 2.220e-4  
-0.343, 2.230e-4  
-0.344, 2.221e-4  
-0.345, 2.240e-4  
-0.346, 2.239e-4  
-0.347, 2.258e-4  
-0.348, 2.262e-4  
-0.349, 2.258e-4  
-0.350, 2.257e-4  
-0.351, 2.286e-4  
-0.352, 2.294e-4  
-0.353, 2.304e-4  
-0.354, 2.302e-4  
-0.355, 2.310e-4  
-0.356, 2.303e-4  
-0.357, 2.324e-4  
-0.358, 2.329e-4  
-0.359, 2.324e-4  
-0.360, 2.334e-4  
-0.361, 2.338e-4  
-0.362, 2.343e-4  
-0.363, 2.352e-4  
-0.364, 2.348e-4  
-0.365, 2.346e-4  
-0.366, 2.381e-4  
-0.367, 2.378e-4  
-0.368, 2.386e-4  
-0.369, 2.390e-4  
-0.370, 2.391e-4  
-0.371, 2.384e-4  
-0.372, 2.406e-4  
-0.373, 2.402e-4  
-0.374, 2.403e-4  
-0.375, 2.409e-4  
-0.376, 2.414e-4  
-0.377, 2.413e-4  
-0.378, 2.421e-4  
-0.379, 2.414e-4  
-0.380, 2.424e-4  
-0.381, 2.447e-4



-0.382, 2.443e-4  
-0.383, 2.450e-4  
-0.384, 2.457e-4  
-0.385, 2.453e-4  
-0.386, 2.450e-4  
-0.387, 2.468e-4  
-0.388, 2.459e-4  
-0.389, 2.469e-4  
-0.390, 2.467e-4  
-0.391, 2.480e-4  
-0.392, 2.475e-4  
-0.393, 2.478e-4  
-0.394, 2.478e-4  
-0.395, 2.485e-4  
-0.396, 2.502e-4  
-0.397, 2.500e-4  
-0.398, 2.506e-4  
-0.399, 2.513e-4

Mar. 29, 2021 04:18:51

Linear Sweep Voltammetry

File: c:\users\shadji04\desktop\sofia cv\29032021\sweep scan under oxygen ph  
2.5\300 rpm.txt

Data Source: Experiment

Instrument Model: CHI650E

Header:

Note: 300 rpm

Init E (V) = 0.8

Final E (V) = -0.4

Scan Rate (V/s) = 0.025

Sample Interval (V) = 0.001

Quiet Time (sec) = 2

Sensitivity (A/V) = 0.001

Potential/V, Current/A

0.800, -4.526e-5

0.799, -4.477e-5

0.798, -4.437e-5

0.797, -4.399e-5

0.796, -4.365e-5

0.795, -4.338e-5

0.794, -4.306e-5

0.793, -4.277e-5

0.792, -4.245e-5

0.791, -4.216e-5

0.790, -4.195e-5

0.789, -4.166e-5

0.788, -4.139e-5

0.787, -4.110e-5

0.786, -4.082e-5

0.785, -4.063e-5

0.784, -4.036e-5

0.783, -4.009e-5  
0.782, -3.982e-5  
0.781, -3.959e-5  
0.780, -3.940e-5  
0.779, -3.914e-5  
0.778, -3.888e-5  
0.777, -3.863e-5  
0.776, -3.843e-5  
0.775, -3.825e-5  
0.774, -3.802e-5  
0.773, -3.777e-5  
0.772, -3.752e-5  
0.771, -3.732e-5  
0.770, -3.715e-5  
0.769, -3.689e-5  
0.768, -3.666e-5  
0.767, -3.643e-5  
0.766, -3.622e-5  
0.765, -3.604e-5  
0.764, -3.579e-5  
0.763, -3.556e-5  
0.762, -3.531e-5  
0.761, -3.511e-5  
0.760, -3.490e-5  
0.759, -3.466e-5  
0.758, -3.443e-5  
0.757, -3.419e-5  
0.756, -3.398e-5  
0.755, -3.379e-5  
0.754, -3.358e-5  
0.753, -3.333e-5  
0.752, -3.311e-5  
0.751, -3.290e-5  
0.750, -3.272e-5  
0.749, -3.248e-5  
0.748, -3.224e-5  
0.747, -3.201e-5  
0.746, -3.181e-5  
0.745, -3.164e-5  
0.744, -3.141e-5  
0.743, -3.116e-5  
0.742, -3.094e-5  
0.741, -3.076e-5  
0.740, -3.060e-5  
0.739, -3.035e-5  
0.738, -3.013e-5  
0.737, -2.993e-5  
0.736, -2.975e-5  
0.735, -2.957e-5  
0.734, -2.936e-5

0.733, -2.914e-5  
0.732, -2.891e-5  
0.731, -2.874e-5  
0.730, -2.857e-5  
0.729, -2.837e-5  
0.728, -2.817e-5  
0.727, -2.796e-5  
0.726, -2.780e-5  
0.725, -2.764e-5  
0.724, -2.742e-5  
0.723, -2.722e-5  
0.722, -2.701e-5  
0.721, -2.685e-5  
0.720, -2.670e-5  
0.719, -2.648e-5  
0.718, -2.629e-5  
0.717, -2.608e-5  
0.716, -2.590e-5  
0.715, -2.575e-5  
0.714, -2.555e-5  
0.713, -2.538e-5  
0.712, -2.521e-5  
0.711, -2.504e-5  
0.710, -2.490e-5  
0.709, -2.469e-5  
0.708, -2.451e-5  
0.707, -2.432e-5  
0.706, -2.417e-5  
0.705, -2.402e-5  
0.704, -2.382e-5  
0.703, -2.366e-5  
0.702, -2.348e-5  
0.701, -2.332e-5  
0.700, -2.318e-5  
0.699, -2.299e-5  
0.698, -2.284e-5  
0.697, -2.266e-5  
0.696, -2.252e-5  
0.695, -2.238e-5  
0.694, -2.220e-5  
0.693, -2.204e-5  
0.692, -2.186e-5  
0.691, -2.171e-5  
0.690, -2.159e-5  
0.689, -2.142e-5  
0.688, -2.128e-5  
0.687, -2.114e-5  
0.686, -2.101e-5  
0.685, -2.086e-5  
0.684, -2.071e-5

0.683, -2.058e-5  
0.682, -2.043e-5  
0.681, -2.031e-5  
0.680, -2.017e-5  
0.679, -2.001e-5  
0.678, -1.987e-5  
0.677, -1.974e-5  
0.676, -1.961e-5  
0.675, -1.952e-5  
0.674, -1.938e-5  
0.673, -1.924e-5  
0.672, -1.911e-5  
0.671, -1.900e-5  
0.670, -1.890e-5  
0.669, -1.878e-5  
0.668, -1.865e-5  
0.667, -1.853e-5  
0.666, -1.843e-5  
0.665, -1.833e-5  
0.664, -1.818e-5  
0.663, -1.806e-5  
0.662, -1.792e-5  
0.661, -1.783e-5  
0.660, -1.771e-5  
0.659, -1.760e-5  
0.658, -1.751e-5  
0.657, -1.739e-5  
0.656, -1.730e-5  
0.655, -1.721e-5  
0.654, -1.707e-5  
0.653, -1.696e-5  
0.652, -1.684e-5  
0.651, -1.676e-5  
0.650, -1.667e-5  
0.649, -1.656e-5  
0.648, -1.649e-5  
0.647, -1.638e-5  
0.646, -1.626e-5  
0.645, -1.619e-5  
0.644, -1.609e-5  
0.643, -1.602e-5  
0.642, -1.592e-5  
0.641, -1.584e-5  
0.640, -1.576e-5  
0.639, -1.566e-5  
0.638, -1.557e-5  
0.637, -1.546e-5  
0.636, -1.539e-5  
0.635, -1.533e-5  
0.634, -1.523e-5

0.633, -1.512e-5  
0.632, -1.504e-5  
0.631, -1.498e-5  
0.630, -1.491e-5  
0.629, -1.480e-5  
0.628, -1.470e-5  
0.627, -1.460e-5  
0.626, -1.454e-5  
0.625, -1.445e-5  
0.624, -1.436e-5  
0.623, -1.429e-5  
0.622, -1.419e-5  
0.621, -1.412e-5  
0.620, -1.404e-5  
0.619, -1.392e-5  
0.618, -1.383e-5  
0.617, -1.375e-5  
0.616, -1.370e-5  
0.615, -1.360e-5  
0.614, -1.350e-5  
0.613, -1.343e-5  
0.612, -1.334e-5  
0.611, -1.329e-5  
0.610, -1.323e-5  
0.609, -1.314e-5  
0.608, -1.305e-5  
0.607, -1.295e-5  
0.606, -1.290e-5  
0.605, -1.283e-5  
0.604, -1.273e-5  
0.603, -1.266e-5  
0.602, -1.256e-5  
0.601, -1.249e-5  
0.600, -1.242e-5  
0.599, -1.231e-5  
0.598, -1.224e-5  
0.597, -1.215e-5  
0.596, -1.206e-5  
0.595, -1.199e-5  
0.594, -1.188e-5  
0.593, -1.181e-5  
0.592, -1.172e-5  
0.591, -1.165e-5  
0.590, -1.157e-5  
0.589, -1.148e-5  
0.588, -1.139e-5  
0.587, -1.130e-5  
0.586, -1.123e-5  
0.585, -1.116e-5  
0.584, -1.104e-5

0.583, -1.096e-5  
0.582, -1.086e-5  
0.581, -1.079e-5  
0.580, -1.069e-5  
0.579, -1.058e-5  
0.578, -1.049e-5  
0.577, -1.041e-5  
0.576, -1.033e-5  
0.575, -1.024e-5  
0.574, -1.013e-5  
0.573, -1.002e-5  
0.572, -9.897e-6  
0.571, -9.828e-6  
0.570, -9.723e-6  
0.569, -9.590e-6  
0.568, -9.505e-6  
0.567, -9.387e-6  
0.566, -9.307e-6  
0.565, -9.203e-6  
0.564, -9.089e-6  
0.563, -8.986e-6  
0.562, -8.848e-6  
0.561, -8.771e-6  
0.560, -8.662e-6  
0.559, -8.545e-6  
0.558, -8.430e-6  
0.557, -8.294e-6  
0.556, -8.183e-6  
0.555, -8.077e-6  
0.554, -7.947e-6  
0.553, -7.830e-6  
0.552, -7.693e-6  
0.551, -7.589e-6  
0.550, -7.461e-6  
0.549, -7.314e-6  
0.548, -7.186e-6  
0.547, -7.042e-6  
0.546, -6.941e-6  
0.545, -6.806e-6  
0.544, -6.655e-6  
0.543, -6.523e-6  
0.542, -6.351e-6  
0.541, -6.228e-6  
0.540, -6.089e-6  
0.539, -5.930e-6  
0.538, -5.797e-6  
0.537, -5.637e-6  
0.536, -5.512e-6  
0.535, -5.356e-6  
0.534, -5.170e-6

0.533, -5.012e-6  
0.532, -4.826e-6  
0.531, -4.699e-6  
0.530, -4.530e-6  
0.529, -4.322e-6  
0.528, -4.166e-6  
0.527, -3.971e-6  
0.526, -3.832e-6  
0.525, -3.663e-6  
0.524, -3.448e-6  
0.523, -3.267e-6  
0.522, -3.044e-6  
0.521, -2.890e-6  
0.520, -2.692e-6  
0.519, -2.455e-6  
0.518, -2.266e-6  
0.517, -2.033e-6  
0.516, -1.843e-6  
0.515, -1.642e-6  
0.514, -1.399e-6  
0.513, -1.190e-6  
0.512, -9.545e-7  
0.511, -7.561e-7  
0.510, -5.458e-7  
0.509, -2.933e-7  
0.508, -6.445e-8  
0.507, 1.851e-7  
0.506, 3.894e-7  
0.505, 6.439e-7  
0.504, 9.258e-7  
0.503, 1.165e-6  
0.502, 1.446e-6  
0.501, 1.668e-6  
0.500, 1.936e-6  
0.499, 2.242e-6  
0.498, 2.490e-6  
0.497, 2.793e-6  
0.496, 3.024e-6  
0.495, 3.315e-6  
0.494, 3.647e-6  
0.493, 3.904e-6  
0.492, 4.224e-6  
0.491, 4.471e-6  
0.490, 4.774e-6  
0.489, 5.129e-6  
0.488, 5.410e-6  
0.487, 5.771e-6  
0.486, 6.039e-6  
0.485, 6.340e-6  
0.484, 6.697e-6

0.483, 6.986e-6  
0.482, 7.330e-6  
0.481, 7.614e-6  
0.480, 7.931e-6  
0.479, 8.310e-6  
0.478, 8.613e-6  
0.477, 8.989e-6  
0.476, 9.285e-6  
0.475, 9.631e-6  
0.474, 1.002e-5  
0.473, 1.034e-5  
0.472, 1.071e-5  
0.471, 1.103e-5  
0.470, 1.138e-5  
0.469, 1.179e-5  
0.468, 1.212e-5  
0.467, 1.248e-5  
0.466, 1.279e-5  
0.465, 1.316e-5  
0.464, 1.356e-5  
0.463, 1.389e-5  
0.462, 1.426e-5  
0.461, 1.457e-5  
0.460, 1.495e-5  
0.459, 1.536e-5  
0.458, 1.567e-5  
0.457, 1.605e-5  
0.456, 1.636e-5  
0.455, 1.674e-5  
0.454, 1.715e-5  
0.453, 1.748e-5  
0.452, 1.787e-5  
0.451, 1.817e-5  
0.450, 1.854e-5  
0.449, 1.895e-5  
0.448, 1.926e-5  
0.447, 1.963e-5  
0.446, 1.992e-5  
0.445, 2.030e-5  
0.444, 2.070e-5  
0.443, 2.098e-5  
0.442, 2.136e-5  
0.441, 2.164e-5  
0.440, 2.197e-5  
0.439, 2.235e-5  
0.438, 2.264e-5  
0.437, 2.300e-5  
0.436, 2.328e-5  
0.435, 2.364e-5  
0.434, 2.403e-5



0.433, 2.432e-5  
0.432, 2.467e-5  
0.431, 2.497e-5  
0.430, 2.533e-5  
0.429, 2.571e-5  
0.428, 2.600e-5  
0.427, 2.633e-5  
0.426, 2.662e-5  
0.425, 2.698e-5  
0.424, 2.736e-5  
0.423, 2.764e-5  
0.422, 2.798e-5  
0.421, 2.827e-5  
0.420, 2.862e-5  
0.419, 2.896e-5  
0.418, 2.924e-5  
0.417, 2.958e-5  
0.416, 2.985e-5  
0.415, 3.021e-5  
0.414, 3.056e-5  
0.413, 3.085e-5  
0.412, 3.120e-5  
0.411, 3.147e-5  
0.410, 3.185e-5  
0.409, 3.226e-5  
0.408, 3.252e-5  
0.407, 3.288e-5  
0.406, 3.316e-5  
0.405, 3.352e-5  
0.404, 3.391e-5  
0.403, 3.418e-5  
0.402, 3.454e-5  
0.401, 3.482e-5  
0.400, 3.519e-5  
0.399, 3.556e-5  
0.398, 3.584e-5  
0.397, 3.622e-5  
0.396, 3.652e-5  
0.395, 3.690e-5  
0.394, 3.731e-5  
0.393, 3.763e-5  
0.392, 3.798e-5  
0.391, 3.830e-5  
0.390, 3.870e-5  
0.389, 3.910e-5  
0.388, 3.943e-5  
0.387, 3.981e-5  
0.386, 4.014e-5  
0.385, 4.056e-5  
0.384, 4.098e-5

0.383, 4.129e-5  
0.382, 4.168e-5  
0.381, 4.202e-5  
0.380, 4.245e-5  
0.379, 4.287e-5  
0.378, 4.321e-5  
0.377, 4.362e-5  
0.376, 4.399e-5  
0.375, 4.445e-5  
0.374, 4.490e-5  
0.373, 4.526e-5  
0.372, 4.572e-5  
0.371, 4.610e-5  
0.370, 4.656e-5  
0.369, 4.703e-5  
0.368, 4.739e-5  
0.367, 4.782e-5  
0.366, 4.821e-5  
0.365, 4.871e-5  
0.364, 4.919e-5  
0.363, 4.954e-5  
0.362, 4.999e-5  
0.361, 5.038e-5  
0.360, 5.086e-5  
0.359, 5.132e-5  
0.358, 5.170e-5  
0.357, 5.214e-5  
0.356, 5.256e-5  
0.355, 5.302e-5  
0.354, 5.350e-5  
0.353, 5.387e-5  
0.352, 5.434e-5  
0.351, 5.476e-5  
0.350, 5.527e-5  
0.349, 5.578e-5  
0.348, 5.618e-5  
0.347, 5.665e-5  
0.346, 5.708e-5  
0.345, 5.762e-5  
0.344, 5.813e-5  
0.343, 5.854e-5  
0.342, 5.901e-5  
0.341, 5.943e-5  
0.340, 5.995e-5  
0.339, 6.044e-5  
0.338, 6.081e-5  
0.337, 6.124e-5  
0.336, 6.164e-5  
0.335, 6.215e-5  
0.334, 6.264e-5

0.333, 6.303e-5  
0.332, 6.349e-5  
0.331, 6.390e-5  
0.330, 6.442e-5  
0.329, 6.491e-5  
0.328, 6.529e-5  
0.327, 6.575e-5  
0.326, 6.616e-5  
0.325, 6.667e-5  
0.324, 6.716e-5  
0.323, 6.754e-5  
0.322, 6.803e-5  
0.321, 6.846e-5  
0.320, 6.896e-5  
0.319, 6.943e-5  
0.318, 6.983e-5  
0.317, 7.029e-5  
0.316, 7.071e-5  
0.315, 7.122e-5  
0.314, 7.172e-5  
0.313, 7.211e-5  
0.312, 7.257e-5  
0.311, 7.300e-5  
0.310, 7.351e-5  
0.309, 7.399e-5  
0.308, 7.439e-5  
0.307, 7.487e-5  
0.306, 7.528e-5  
0.305, 7.579e-5  
0.304, 7.626e-5  
0.303, 7.666e-5  
0.302, 7.711e-5  
0.301, 7.754e-5  
0.300, 7.807e-5  
0.299, 7.854e-5  
0.298, 7.894e-5  
0.297, 7.944e-5  
0.296, 7.987e-5  
0.295, 8.037e-5  
0.294, 8.085e-5  
0.293, 8.125e-5  
0.292, 8.171e-5  
0.291, 8.214e-5  
0.290, 8.266e-5  
0.289, 8.314e-5  
0.288, 8.351e-5  
0.287, 8.397e-5  
0.286, 8.441e-5  
0.285, 8.491e-5  
0.284, 8.536e-5

0.283, 8.575e-5  
0.282, 8.621e-5  
0.281, 8.665e-5  
0.280, 8.716e-5  
0.279, 8.762e-5  
0.278, 8.801e-5  
0.277, 8.846e-5  
0.276, 8.890e-5  
0.275, 8.941e-5  
0.274, 8.987e-5  
0.273, 9.026e-5  
0.272, 9.073e-5  
0.271, 9.119e-5  
0.270, 9.171e-5  
0.269, 9.218e-5  
0.268, 9.256e-5  
0.267, 9.302e-5  
0.266, 9.349e-5  
0.265, 9.402e-5  
0.264, 9.448e-5  
0.263, 9.487e-5  
0.262, 9.536e-5  
0.261, 9.585e-5  
0.260, 9.638e-5  
0.259, 9.684e-5  
0.258, 9.723e-5  
0.257, 9.772e-5  
0.256, 9.819e-5  
0.255, 9.869e-5  
0.254, 9.915e-5  
0.253, 9.953e-5  
0.252, 9.999e-5  
0.251, 1.005e-4  
0.250, 1.010e-4  
0.249, 1.015e-4  
0.248, 1.019e-4  
0.247, 1.023e-4  
0.246, 1.028e-4  
0.245, 1.033e-4  
0.244, 1.038e-4  
0.243, 1.042e-4  
0.242, 1.047e-4  
0.241, 1.051e-4  
0.240, 1.057e-4  
0.239, 1.062e-4  
0.238, 1.066e-4  
0.237, 1.071e-4  
0.236, 1.076e-4  
0.235, 1.082e-4  
0.234, 1.088e-4

0.233, 1.091e-4  
0.232, 1.096e-4  
0.231, 1.101e-4  
0.230, 1.106e-4  
0.229, 1.111e-4  
0.228, 1.114e-4  
0.227, 1.118e-4  
0.226, 1.122e-4  
0.225, 1.127e-4  
0.224, 1.132e-4  
0.223, 1.136e-4  
0.222, 1.140e-4  
0.221, 1.145e-4  
0.220, 1.150e-4  
0.219, 1.155e-4  
0.218, 1.159e-4  
0.217, 1.164e-4  
0.216, 1.169e-4  
0.215, 1.174e-4  
0.214, 1.179e-4  
0.213, 1.182e-4  
0.212, 1.187e-4  
0.211, 1.191e-4  
0.210, 1.196e-4  
0.209, 1.200e-4  
0.208, 1.204e-4  
0.207, 1.209e-4  
0.206, 1.214e-4  
0.205, 1.220e-4  
0.204, 1.225e-4  
0.203, 1.228e-4  
0.202, 1.233e-4  
0.201, 1.238e-4  
0.200, 1.244e-4  
0.199, 1.248e-4  
0.198, 1.252e-4  
0.197, 1.257e-4  
0.196, 1.262e-4  
0.195, 1.268e-4  
0.194, 1.272e-4  
0.193, 1.276e-4  
0.192, 1.281e-4  
0.191, 1.286e-4  
0.190, 1.291e-4  
0.189, 1.295e-4  
0.188, 1.299e-4  
0.187, 1.303e-4  
0.186, 1.309e-4  
0.185, 1.314e-4  
0.184, 1.319e-4

0.183, 1.322e-4  
0.182, 1.327e-4  
0.181, 1.332e-4  
0.180, 1.337e-4  
0.179, 1.342e-4  
0.178, 1.345e-4  
0.177, 1.349e-4  
0.176, 1.354e-4  
0.175, 1.359e-4  
0.174, 1.363e-4  
0.173, 1.366e-4  
0.172, 1.371e-4  
0.171, 1.376e-4  
0.170, 1.381e-4  
0.169, 1.386e-4  
0.168, 1.390e-4  
0.167, 1.395e-4  
0.166, 1.401e-4  
0.165, 1.406e-4  
0.164, 1.411e-4  
0.163, 1.414e-4  
0.162, 1.418e-4  
0.161, 1.423e-4  
0.160, 1.429e-4  
0.159, 1.434e-4  
0.158, 1.437e-4  
0.157, 1.442e-4  
0.156, 1.448e-4  
0.155, 1.454e-4  
0.154, 1.460e-4  
0.153, 1.464e-4  
0.152, 1.469e-4  
0.151, 1.476e-4  
0.150, 1.482e-4  
0.149, 1.487e-4  
0.148, 1.490e-4  
0.147, 1.495e-4  
0.146, 1.500e-4  
0.145, 1.506e-4  
0.144, 1.511e-4  
0.143, 1.513e-4  
0.142, 1.518e-4  
0.141, 1.524e-4  
0.140, 1.530e-4  
0.139, 1.535e-4  
0.138, 1.538e-4  
0.137, 1.543e-4  
0.136, 1.549e-4  
0.135, 1.556e-4  
0.134, 1.561e-4

0.133, 1.564e-4  
0.132, 1.570e-4  
0.131, 1.576e-4  
0.130, 1.583e-4  
0.129, 1.588e-4  
0.128, 1.592e-4  
0.127, 1.598e-4  
0.126, 1.605e-4  
0.125, 1.613e-4  
0.124, 1.618e-4  
0.123, 1.622e-4  
0.122, 1.627e-4  
0.121, 1.634e-4  
0.120, 1.641e-4  
0.119, 1.647e-4  
0.118, 1.650e-4  
0.117, 1.656e-4  
0.116, 1.662e-4  
0.115, 1.670e-4  
0.114, 1.675e-4  
0.113, 1.679e-4  
0.112, 1.685e-4  
0.111, 1.693e-4  
0.110, 1.701e-4  
0.109, 1.707e-4  
0.108, 1.710e-4  
0.107, 1.717e-4  
0.106, 1.724e-4  
0.105, 1.732e-4  
0.104, 1.738e-4  
0.103, 1.742e-4  
0.102, 1.748e-4  
0.101, 1.756e-4  
0.100, 1.764e-4  
0.099, 1.770e-4  
0.098, 1.774e-4  
0.097, 1.781e-4  
0.096, 1.789e-4  
0.095, 1.797e-4  
0.094, 1.804e-4  
0.093, 1.808e-4  
0.092, 1.816e-4  
0.091, 1.824e-4  
0.090, 1.833e-4  
0.089, 1.839e-4  
0.088, 1.843e-4  
0.087, 1.850e-4  
0.086, 1.857e-4  
0.085, 1.866e-4  
0.084, 1.872e-4

0.083, 1.876e-4  
0.082, 1.883e-4  
0.081, 1.891e-4  
0.080, 1.899e-4  
0.079, 1.905e-4  
0.078, 1.909e-4  
0.077, 1.916e-4  
0.076, 1.924e-4  
0.075, 1.932e-4  
0.074, 1.938e-4  
0.073, 1.941e-4  
0.072, 1.948e-4  
0.071, 1.956e-4  
0.070, 1.965e-4  
0.069, 1.970e-4  
0.068, 1.974e-4  
0.067, 1.981e-4  
0.066, 1.988e-4  
0.065, 1.996e-4  
0.064, 2.001e-4  
0.063, 2.004e-4  
0.062, 2.011e-4  
0.061, 2.018e-4  
0.060, 2.026e-4  
0.059, 2.030e-4  
0.058, 2.032e-4  
0.057, 2.038e-4  
0.056, 2.044e-4  
0.055, 2.051e-4  
0.054, 2.055e-4  
0.053, 2.057e-4  
0.052, 2.063e-4  
0.051, 2.070e-4  
0.050, 2.078e-4  
0.049, 2.082e-4  
0.048, 2.085e-4  
0.047, 2.092e-4  
0.046, 2.098e-4  
0.045, 2.106e-4  
0.044, 2.110e-4  
0.043, 2.113e-4  
0.042, 2.120e-4  
0.041, 2.126e-4  
0.040, 2.134e-4  
0.039, 2.137e-4  
0.038, 2.140e-4  
0.037, 2.146e-4  
0.036, 2.152e-4  
0.035, 2.158e-4  
0.034, 2.161e-4



0.033, 2.163e-4  
0.032, 2.168e-4  
0.031, 2.174e-4  
0.030, 2.180e-4  
0.029, 2.182e-4  
0.028, 2.184e-4  
0.027, 2.189e-4  
0.026, 2.195e-4  
0.025, 2.202e-4  
0.024, 2.206e-4  
0.023, 2.209e-4  
0.022, 2.215e-4  
0.021, 2.221e-4  
0.020, 2.227e-4  
0.019, 2.230e-4  
0.018, 2.233e-4  
0.017, 2.239e-4  
0.016, 2.244e-4  
0.015, 2.250e-4  
0.014, 2.252e-4  
0.013, 2.254e-4  
0.012, 2.260e-4  
0.011, 2.265e-4  
0.010, 2.271e-4  
0.009, 2.274e-4  
0.008, 2.276e-4  
0.007, 2.282e-4  
0.006, 2.287e-4  
0.005, 2.294e-4  
0.004, 2.296e-4  
0.003, 2.298e-4  
0.002, 2.303e-4  
0.001, 2.309e-4  
0.000, 2.315e-4  
-0.001, 2.317e-4  
-0.002, 2.318e-4  
-0.003, 2.322e-4  
-0.004, 2.327e-4  
-0.005, 2.332e-4  
-0.006, 2.333e-4  
-0.007, 2.335e-4  
-0.008, 2.339e-4  
-0.009, 2.344e-4  
-0.010, 2.349e-4  
-0.011, 2.350e-4  
-0.012, 2.352e-4  
-0.013, 2.357e-4  
-0.014, 2.362e-4  
-0.015, 2.367e-4  
-0.016, 2.368e-4

-0.017, 2.370e-4  
-0.018, 2.375e-4  
-0.019, 2.381e-4  
-0.020, 2.386e-4  
-0.021, 2.388e-4  
-0.022, 2.389e-4  
-0.023, 2.394e-4  
-0.024, 2.399e-4  
-0.025, 2.404e-4  
-0.026, 2.405e-4  
-0.027, 2.406e-4  
-0.028, 2.411e-4  
-0.029, 2.414e-4  
-0.030, 2.419e-4  
-0.031, 2.419e-4  
-0.032, 2.421e-4  
-0.033, 2.425e-4  
-0.034, 2.430e-4  
-0.035, 2.435e-4  
-0.036, 2.436e-4  
-0.037, 2.438e-4  
-0.038, 2.442e-4  
-0.039, 2.446e-4  
-0.040, 2.450e-4  
-0.041, 2.451e-4  
-0.042, 2.452e-4  
-0.043, 2.456e-4  
-0.044, 2.460e-4  
-0.045, 2.464e-4  
-0.046, 2.464e-4  
-0.047, 2.465e-4  
-0.048, 2.469e-4  
-0.049, 2.473e-4  
-0.050, 2.477e-4  
-0.051, 2.478e-4  
-0.052, 2.478e-4  
-0.053, 2.482e-4  
-0.054, 2.486e-4  
-0.055, 2.490e-4  
-0.056, 2.489e-4  
-0.057, 2.490e-4  
-0.058, 2.493e-4  
-0.059, 2.497e-4  
-0.060, 2.501e-4  
-0.061, 2.501e-4  
-0.062, 2.503e-4  
-0.063, 2.507e-4  
-0.064, 2.511e-4  
-0.065, 2.515e-4  
-0.066, 2.515e-4

-0.067, 2.516e-4  
-0.068, 2.520e-4  
-0.069, 2.524e-4  
-0.070, 2.527e-4  
-0.071, 2.527e-4  
-0.072, 2.528e-4  
-0.073, 2.532e-4  
-0.074, 2.535e-4  
-0.075, 2.538e-4  
-0.076, 2.537e-4  
-0.077, 2.538e-4  
-0.078, 2.541e-4  
-0.079, 2.544e-4  
-0.080, 2.545e-4  
-0.081, 2.544e-4  
-0.082, 2.543e-4  
-0.083, 2.546e-4  
-0.084, 2.550e-4  
-0.085, 2.552e-4  
-0.086, 2.552e-4  
-0.087, 2.554e-4  
-0.088, 2.560e-4  
-0.089, 2.565e-4  
-0.090, 2.569e-4  
-0.091, 2.569e-4  
-0.092, 2.571e-4  
-0.093, 2.574e-4  
-0.094, 2.577e-4  
-0.095, 2.579e-4  
-0.096, 2.577e-4  
-0.097, 2.578e-4  
-0.098, 2.581e-4  
-0.099, 2.584e-4  
-0.100, 2.587e-4  
-0.101, 2.585e-4  
-0.102, 2.586e-4  
-0.103, 2.591e-4  
-0.104, 2.594e-4  
-0.105, 2.596e-4  
-0.106, 2.595e-4  
-0.107, 2.594e-4  
-0.108, 2.598e-4  
-0.109, 2.601e-4  
-0.110, 2.602e-4  
-0.111, 2.600e-4  
-0.112, 2.599e-4  
-0.113, 2.603e-4  
-0.114, 2.606e-4  
-0.115, 2.608e-4  
-0.116, 2.606e-4

-0.117, 2.606e-4  
-0.118, 2.611e-4  
-0.119, 2.614e-4  
-0.120, 2.616e-4  
-0.121, 2.615e-4  
-0.122, 2.615e-4  
-0.123, 2.619e-4  
-0.124, 2.622e-4  
-0.125, 2.624e-4  
-0.126, 2.623e-4  
-0.127, 2.623e-4  
-0.128, 2.628e-4  
-0.129, 2.632e-4  
-0.130, 2.633e-4  
-0.131, 2.632e-4  
-0.132, 2.633e-4  
-0.133, 2.637e-4  
-0.134, 2.640e-4  
-0.135, 2.642e-4  
-0.136, 2.640e-4  
-0.137, 2.639e-4  
-0.138, 2.642e-4  
-0.139, 2.644e-4  
-0.140, 2.644e-4  
-0.141, 2.642e-4  
-0.142, 2.641e-4  
-0.143, 2.644e-4  
-0.144, 2.646e-4  
-0.145, 2.648e-4  
-0.146, 2.647e-4  
-0.147, 2.647e-4  
-0.148, 2.651e-4  
-0.149, 2.653e-4  
-0.150, 2.654e-4  
-0.151, 2.653e-4  
-0.152, 2.653e-4  
-0.153, 2.657e-4  
-0.154, 2.660e-4  
-0.155, 2.662e-4  
-0.156, 2.662e-4  
-0.157, 2.661e-4  
-0.158, 2.666e-4  
-0.159, 2.669e-4  
-0.160, 2.671e-4  
-0.161, 2.671e-4  
-0.162, 2.672e-4  
-0.163, 2.677e-4  
-0.164, 2.679e-4  
-0.165, 2.679e-4  
-0.166, 2.675e-4

-0.167, 2.673e-4  
-0.168, 2.674e-4  
-0.169, 2.674e-4  
-0.170, 2.673e-4  
-0.171, 2.670e-4  
-0.172, 2.668e-4  
-0.173, 2.670e-4  
-0.174, 2.671e-4  
-0.175, 2.671e-4  
-0.176, 2.669e-4  
-0.177, 2.668e-4  
-0.178, 2.671e-4  
-0.179, 2.673e-4  
-0.180, 2.673e-4  
-0.181, 2.671e-4  
-0.182, 2.670e-4  
-0.183, 2.674e-4  
-0.184, 2.674e-4  
-0.185, 2.674e-4  
-0.186, 2.673e-4  
-0.187, 2.674e-4  
-0.188, 2.678e-4  
-0.189, 2.680e-4  
-0.190, 2.680e-4  
-0.191, 2.678e-4  
-0.192, 2.678e-4  
-0.193, 2.682e-4  
-0.194, 2.684e-4  
-0.195, 2.682e-4  
-0.196, 2.679e-4  
-0.197, 2.678e-4  
-0.198, 2.681e-4  
-0.199, 2.681e-4  
-0.200, 2.679e-4  
-0.201, 2.675e-4  
-0.202, 2.674e-4  
-0.203, 2.676e-4  
-0.204, 2.675e-4  
-0.205, 2.673e-4  
-0.206, 2.670e-4  
-0.207, 2.670e-4  
-0.208, 2.672e-4  
-0.209, 2.673e-4  
-0.210, 2.670e-4  
-0.211, 2.666e-4  
-0.212, 2.666e-4  
-0.213, 2.668e-4  
-0.214, 2.668e-4  
-0.215, 2.665e-4  
-0.216, 2.662e-4

-0.217, 2.660e-4  
-0.218, 2.662e-4  
-0.219, 2.663e-4  
-0.220, 2.661e-4  
-0.221, 2.658e-4  
-0.222, 2.658e-4  
-0.223, 2.661e-4  
-0.224, 2.661e-4  
-0.225, 2.659e-4  
-0.226, 2.656e-4  
-0.227, 2.657e-4  
-0.228, 2.660e-4  
-0.229, 2.659e-4  
-0.230, 2.657e-4  
-0.231, 2.652e-4  
-0.232, 2.651e-4  
-0.233, 2.652e-4  
-0.234, 2.651e-4  
-0.235, 2.649e-4  
-0.236, 2.645e-4  
-0.237, 2.646e-4  
-0.238, 2.648e-4  
-0.239, 2.648e-4  
-0.240, 2.643e-4  
-0.241, 2.639e-4  
-0.242, 2.638e-4  
-0.243, 2.639e-4  
-0.244, 2.638e-4  
-0.245, 2.634e-4  
-0.246, 2.629e-4  
-0.247, 2.629e-4  
-0.248, 2.630e-4  
-0.249, 2.628e-4  
-0.250, 2.624e-4  
-0.251, 2.619e-4  
-0.252, 2.620e-4  
-0.253, 2.621e-4  
-0.254, 2.621e-4  
-0.255, 2.618e-4  
-0.256, 2.613e-4  
-0.257, 2.614e-4  
-0.258, 2.615e-4  
-0.259, 2.615e-4  
-0.260, 2.613e-4  
-0.261, 2.608e-4  
-0.262, 2.609e-4  
-0.263, 2.609e-4  
-0.264, 2.608e-4  
-0.265, 2.607e-4  
-0.266, 2.604e-4

-0.267, 2.607e-4  
-0.268, 2.609e-4  
-0.269, 2.610e-4  
-0.270, 2.609e-4  
-0.271, 2.605e-4  
-0.272, 2.607e-4  
-0.273, 2.609e-4  
-0.274, 2.610e-4  
-0.275, 2.608e-4  
-0.276, 2.605e-4  
-0.277, 2.607e-4  
-0.278, 2.612e-4  
-0.279, 2.615e-4  
-0.280, 2.617e-4  
-0.281, 2.615e-4  
-0.282, 2.620e-4  
-0.283, 2.626e-4  
-0.284, 2.632e-4  
-0.285, 2.636e-4  
-0.286, 2.637e-4  
-0.287, 2.644e-4  
-0.288, 2.654e-4  
-0.289, 2.664e-4  
-0.290, 2.671e-4  
-0.291, 2.673e-4  
-0.292, 2.682e-4  
-0.293, 2.694e-4  
-0.294, 2.706e-4  
-0.295, 2.715e-4  
-0.296, 2.718e-4  
-0.297, 2.729e-4  
-0.298, 2.743e-4  
-0.299, 2.757e-4  
-0.300, 2.768e-4  
-0.301, 2.773e-4  
-0.302, 2.786e-4  
-0.303, 2.806e-4  
-0.304, 2.825e-4  
-0.305, 2.842e-4  
-0.306, 2.850e-4  
-0.307, 2.865e-4  
-0.308, 2.888e-4  
-0.309, 2.908e-4  
-0.310, 2.926e-4  
-0.311, 2.932e-4  
-0.312, 2.945e-4  
-0.313, 2.965e-4  
-0.314, 2.984e-4  
-0.315, 2.999e-4  
-0.316, 3.005e-4

-0.317, 3.023e-4  
-0.318, 3.050e-4  
-0.319, 3.075e-4  
-0.320, 3.095e-4  
-0.321, 3.105e-4  
-0.322, 3.121e-4  
-0.323, 3.148e-4  
-0.324, 3.171e-4  
-0.325, 3.188e-4  
-0.326, 3.195e-4  
-0.327, 3.213e-4  
-0.328, 3.242e-4  
-0.329, 3.266e-4  
-0.330, 3.281e-4  
-0.331, 3.285e-4  
-0.332, 3.300e-4  
-0.333, 3.325e-4  
-0.334, 3.348e-4  
-0.335, 3.362e-4  
-0.336, 3.365e-4  
-0.337, 3.382e-4  
-0.338, 3.411e-4  
-0.339, 3.438e-4  
-0.340, 3.454e-4  
-0.341, 3.456e-4  
-0.342, 3.473e-4  
-0.343, 3.500e-4  
-0.344, 3.523e-4  
-0.345, 3.535e-4  
-0.346, 3.535e-4  
-0.347, 3.551e-4  
-0.348, 3.578e-4  
-0.349, 3.598e-4  
-0.350, 3.608e-4  
-0.351, 3.605e-4  
-0.352, 3.617e-4  
-0.353, 3.640e-4  
-0.354, 3.657e-4  
-0.355, 3.665e-4  
-0.356, 3.659e-4  
-0.357, 3.669e-4  
-0.358, 3.692e-4  
-0.359, 3.712e-4  
-0.360, 3.720e-4  
-0.361, 3.717e-4  
-0.362, 3.730e-4  
-0.363, 3.753e-4  
-0.364, 3.772e-4  
-0.365, 3.781e-4  
-0.366, 3.778e-4



-0.367, 3.790e-4  
-0.368, 3.810e-4  
-0.369, 3.828e-4  
-0.370, 3.837e-4  
-0.371, 3.834e-4  
-0.372, 3.847e-4  
-0.373, 3.868e-4  
-0.374, 3.884e-4  
-0.375, 3.888e-4  
-0.376, 3.881e-4  
-0.377, 3.886e-4  
-0.378, 3.900e-4  
-0.379, 3.910e-4  
-0.380, 3.915e-4  
-0.381, 3.908e-4  
-0.382, 3.916e-4  
-0.383, 3.933e-4  
-0.384, 3.944e-4  
-0.385, 3.949e-4  
-0.386, 3.942e-4  
-0.387, 3.948e-4  
-0.388, 3.961e-4  
-0.389, 3.973e-4  
-0.390, 3.979e-4  
-0.391, 3.977e-4  
-0.392, 3.989e-4  
-0.393, 4.006e-4  
-0.394, 4.019e-4  
-0.395, 4.023e-4  
-0.396, 4.019e-4  
-0.397, 4.024e-4  
-0.398, 4.036e-4  
-0.399, 4.045e-4

Mar. 29, 2021 04:22:45

Linear Sweep Voltammetry

File: c:\users\shadji04\desktop\sofia cv\29032021\sweep scan under oxygen ph  
2.5\500 rpm.txt

Data Source: Experiment

Instrument Model: CHI650E

Header:

Note: 500 rpm

Init E (V) = 0.8

Final E (V) = -0.4

Scan Rate (V/s) = 0.025

Sample Interval (V) = 0.001

Quiet Time (sec) = 2

Sensitivity (A/V) = 0.001

Potential/V, Current/A

0.800, -5.371e-5

0.799, -5.321e-5

0.798, -5.279e-5  
0.797, -5.238e-5  
0.796, -5.198e-5  
0.795, -5.164e-5  
0.794, -5.134e-5  
0.793, -5.104e-5  
0.792, -5.072e-5  
0.791, -5.041e-5  
0.790, -5.012e-5  
0.789, -4.982e-5  
0.788, -4.955e-5  
0.787, -4.929e-5  
0.786, -4.900e-5  
0.785, -4.872e-5  
0.784, -4.841e-5  
0.783, -4.810e-5  
0.782, -4.780e-5  
0.781, -4.749e-5  
0.780, -4.715e-5  
0.779, -4.685e-5  
0.778, -4.653e-5  
0.777, -4.619e-5  
0.776, -4.588e-5  
0.775, -4.561e-5  
0.774, -4.530e-5  
0.773, -4.501e-5  
0.772, -4.475e-5  
0.771, -4.449e-5  
0.770, -4.423e-5  
0.769, -4.399e-5  
0.768, -4.371e-5  
0.767, -4.343e-5  
0.766, -4.317e-5  
0.765, -4.288e-5  
0.764, -4.260e-5  
0.763, -4.233e-5  
0.762, -4.208e-5  
0.761, -4.178e-5  
0.760, -4.153e-5  
0.759, -4.129e-5  
0.758, -4.103e-5  
0.757, -4.077e-5  
0.756, -4.049e-5  
0.755, -4.021e-5  
0.754, -3.996e-5  
0.753, -3.967e-5  
0.752, -3.940e-5  
0.751, -3.915e-5  
0.750, -3.889e-5  
0.749, -3.865e-5

0.748, -3.839e-5  
0.747, -3.815e-5  
0.746, -3.792e-5  
0.745, -3.768e-5  
0.744, -3.745e-5  
0.743, -3.720e-5  
0.742, -3.695e-5  
0.741, -3.669e-5  
0.740, -3.646e-5  
0.739, -3.623e-5  
0.738, -3.597e-5  
0.737, -3.573e-5  
0.736, -3.551e-5  
0.735, -3.526e-5  
0.734, -3.503e-5  
0.733, -3.480e-5  
0.732, -3.457e-5  
0.731, -3.432e-5  
0.730, -3.409e-5  
0.729, -3.383e-5  
0.728, -3.360e-5  
0.727, -3.336e-5  
0.726, -3.312e-5  
0.725, -3.289e-5  
0.724, -3.263e-5  
0.723, -3.240e-5  
0.722, -3.216e-5  
0.721, -3.194e-5  
0.720, -3.171e-5  
0.719, -3.148e-5  
0.718, -3.127e-5  
0.717, -3.102e-5  
0.716, -3.080e-5  
0.715, -3.058e-5  
0.714, -3.036e-5  
0.713, -3.015e-5  
0.712, -2.995e-5  
0.711, -2.974e-5  
0.710, -2.951e-5  
0.709, -2.931e-5  
0.708, -2.912e-5  
0.707, -2.893e-5  
0.706, -2.872e-5  
0.705, -2.853e-5  
0.704, -2.834e-5  
0.703, -2.814e-5  
0.702, -2.796e-5  
0.701, -2.777e-5  
0.700, -2.758e-5  
0.699, -2.740e-5

0.698, -2.721e-5  
0.697, -2.700e-5  
0.696, -2.683e-5  
0.695, -2.664e-5  
0.694, -2.643e-5  
0.693, -2.625e-5  
0.692, -2.606e-5  
0.691, -2.586e-5  
0.690, -2.568e-5  
0.689, -2.551e-5  
0.688, -2.534e-5  
0.687, -2.516e-5  
0.686, -2.498e-5  
0.685, -2.479e-5  
0.684, -2.463e-5  
0.683, -2.448e-5  
0.682, -2.433e-5  
0.681, -2.417e-5  
0.680, -2.402e-5  
0.679, -2.386e-5  
0.678, -2.370e-5  
0.677, -2.354e-5  
0.676, -2.339e-5  
0.675, -2.325e-5  
0.674, -2.310e-5  
0.673, -2.295e-5  
0.672, -2.282e-5  
0.671, -2.267e-5  
0.670, -2.252e-5  
0.669, -2.238e-5  
0.668, -2.223e-5  
0.667, -2.210e-5  
0.666, -2.195e-5  
0.665, -2.182e-5  
0.664, -2.169e-5  
0.663, -2.157e-5  
0.662, -2.144e-5  
0.661, -2.130e-5  
0.660, -2.115e-5  
0.659, -2.104e-5  
0.658, -2.089e-5  
0.657, -2.077e-5  
0.656, -2.066e-5  
0.655, -2.055e-5  
0.654, -2.043e-5  
0.653, -2.030e-5  
0.652, -2.016e-5  
0.651, -2.005e-5  
0.650, -1.991e-5  
0.649, -1.979e-5

0.648, -1.966e-5  
0.647, -1.954e-5  
0.646, -1.942e-5  
0.645, -1.934e-5  
0.644, -1.923e-5  
0.643, -1.915e-5  
0.642, -1.905e-5  
0.641, -1.895e-5  
0.640, -1.884e-5  
0.639, -1.875e-5  
0.638, -1.865e-5  
0.637, -1.855e-5  
0.636, -1.845e-5  
0.635, -1.835e-5  
0.634, -1.824e-5  
0.633, -1.814e-5  
0.632, -1.804e-5  
0.631, -1.792e-5  
0.630, -1.780e-5  
0.629, -1.770e-5  
0.628, -1.761e-5  
0.627, -1.751e-5  
0.626, -1.739e-5  
0.625, -1.728e-5  
0.624, -1.718e-5  
0.623, -1.708e-5  
0.622, -1.698e-5  
0.621, -1.690e-5  
0.620, -1.682e-5  
0.619, -1.672e-5  
0.618, -1.663e-5  
0.617, -1.654e-5  
0.616, -1.645e-5  
0.615, -1.637e-5  
0.614, -1.627e-5  
0.613, -1.618e-5  
0.612, -1.609e-5  
0.611, -1.599e-5  
0.610, -1.590e-5  
0.609, -1.581e-5  
0.608, -1.571e-5  
0.607, -1.563e-5  
0.606, -1.555e-5  
0.605, -1.545e-5  
0.604, -1.535e-5  
0.603, -1.527e-5  
0.602, -1.519e-5  
0.601, -1.511e-5  
0.600, -1.502e-5  
0.599, -1.493e-5

0.598, -1.484e-5  
0.597, -1.476e-5  
0.596, -1.466e-5  
0.595, -1.455e-5  
0.594, -1.447e-5  
0.593, -1.438e-5  
0.592, -1.427e-5  
0.591, -1.419e-5  
0.590, -1.409e-5  
0.589, -1.399e-5  
0.588, -1.390e-5  
0.587, -1.381e-5  
0.586, -1.367e-5  
0.585, -1.360e-5  
0.584, -1.351e-5  
0.583, -1.341e-5  
0.582, -1.332e-5  
0.581, -1.321e-5  
0.580, -1.311e-5  
0.579, -1.302e-5  
0.578, -1.290e-5  
0.577, -1.277e-5  
0.576, -1.268e-5  
0.575, -1.256e-5  
0.574, -1.244e-5  
0.573, -1.234e-5  
0.572, -1.222e-5  
0.571, -1.212e-5  
0.570, -1.201e-5  
0.569, -1.188e-5  
0.568, -1.175e-5  
0.567, -1.166e-5  
0.566, -1.155e-5  
0.565, -1.142e-5  
0.564, -1.132e-5  
0.563, -1.118e-5  
0.562, -1.105e-5  
0.561, -1.096e-5  
0.560, -1.084e-5  
0.559, -1.068e-5  
0.558, -1.058e-5  
0.557, -1.046e-5  
0.556, -1.033e-5  
0.555, -1.020e-5  
0.554, -1.004e-5  
0.553, -9.892e-6  
0.552, -9.767e-6  
0.551, -9.608e-6  
0.550, -9.477e-6  
0.549, -9.327e-6

0.548, -9.162e-6  
0.547, -9.030e-6  
0.546, -8.895e-6  
0.545, -8.739e-6  
0.544, -8.594e-6  
0.543, -8.438e-6  
0.542, -8.277e-6  
0.541, -8.102e-6  
0.540, -7.943e-6  
0.539, -7.775e-6  
0.538, -7.591e-6  
0.537, -7.415e-6  
0.536, -7.237e-6  
0.535, -7.040e-6  
0.534, -6.878e-6  
0.533, -6.708e-6  
0.532, -6.518e-6  
0.531, -6.328e-6  
0.530, -6.125e-6  
0.529, -5.937e-6  
0.528, -5.763e-6  
0.527, -5.544e-6  
0.526, -5.365e-6  
0.525, -5.177e-6  
0.524, -4.959e-6  
0.523, -4.750e-6  
0.522, -4.549e-6  
0.521, -4.321e-6  
0.520, -4.101e-6  
0.519, -3.898e-6  
0.518, -3.650e-6  
0.517, -3.408e-6  
0.516, -3.189e-6  
0.515, -2.946e-6  
0.514, -2.692e-6  
0.513, -2.457e-6  
0.512, -2.188e-6  
0.511, -1.932e-6  
0.510, -1.662e-6  
0.509, -1.387e-6  
0.508, -1.123e-6  
0.507, -8.749e-7  
0.506, -5.871e-7  
0.505, -2.904e-7  
0.504, -2.417e-8  
0.503, 2.696e-7  
0.502, 5.496e-7  
0.501, 8.305e-7  
0.500, 1.134e-6  
0.499, 1.436e-6

0.498, 1.735e-6  
0.497, 2.060e-6  
0.496, 2.385e-6  
0.495, 2.707e-6  
0.494, 3.033e-6  
0.493, 3.383e-6  
0.492, 3.689e-6  
0.491, 4.030e-6  
0.490, 4.388e-6  
0.489, 4.717e-6  
0.488, 5.082e-6  
0.487, 5.467e-6  
0.486, 5.792e-6  
0.485, 6.158e-6  
0.484, 6.534e-6  
0.483, 6.874e-6  
0.482, 7.253e-6  
0.481, 7.639e-6  
0.480, 7.994e-6  
0.479, 8.392e-6  
0.478, 8.787e-6  
0.477, 9.164e-6  
0.476, 9.561e-6  
0.475, 9.956e-6  
0.474, 1.033e-5  
0.473, 1.074e-5  
0.472, 1.115e-5  
0.471, 1.154e-5  
0.470, 1.195e-5  
0.469, 1.238e-5  
0.468, 1.278e-5  
0.467, 1.319e-5  
0.466, 1.363e-5  
0.465, 1.400e-5  
0.464, 1.441e-5  
0.463, 1.485e-5  
0.462, 1.523e-5  
0.461, 1.566e-5  
0.460, 1.613e-5  
0.459, 1.653e-5  
0.458, 1.694e-5  
0.457, 1.739e-5  
0.456, 1.778e-5  
0.455, 1.819e-5  
0.454, 1.863e-5  
0.453, 1.901e-5  
0.452, 1.944e-5  
0.451, 1.989e-5  
0.450, 2.026e-5  
0.449, 2.068e-5



0.448, 2.111e-5  
0.447, 2.149e-5  
0.446, 2.188e-5  
0.445, 2.229e-5  
0.444, 2.266e-5  
0.443, 2.304e-5  
0.442, 2.348e-5  
0.441, 2.385e-5  
0.440, 2.425e-5  
0.439, 2.467e-5  
0.438, 2.502e-5  
0.437, 2.542e-5  
0.436, 2.583e-5  
0.435, 2.618e-5  
0.434, 2.657e-5  
0.433, 2.699e-5  
0.432, 2.733e-5  
0.431, 2.774e-5  
0.430, 2.817e-5  
0.429, 2.852e-5  
0.428, 2.893e-5  
0.427, 2.935e-5  
0.426, 2.970e-5  
0.425, 3.008e-5  
0.424, 3.049e-5  
0.423, 3.083e-5  
0.422, 3.121e-5  
0.421, 3.165e-5  
0.420, 3.200e-5  
0.419, 3.239e-5  
0.418, 3.282e-5  
0.417, 3.313e-5  
0.416, 3.349e-5  
0.415, 3.392e-5  
0.414, 3.425e-5  
0.413, 3.465e-5  
0.412, 3.509e-5  
0.411, 3.541e-5  
0.410, 3.579e-5  
0.409, 3.624e-5  
0.408, 3.658e-5  
0.407, 3.695e-5  
0.406, 3.734e-5  
0.405, 3.766e-5  
0.404, 3.799e-5  
0.403, 3.838e-5  
0.402, 3.868e-5  
0.401, 3.902e-5  
0.400, 3.941e-5  
0.399, 3.975e-5

0.398, 4.011e-5  
0.397, 4.054e-5  
0.396, 4.088e-5  
0.395, 4.123e-5  
0.394, 4.168e-5  
0.393, 4.204e-5  
0.392, 4.242e-5  
0.391, 4.288e-5  
0.390, 4.322e-5  
0.389, 4.359e-5  
0.388, 4.401e-5  
0.387, 4.434e-5  
0.386, 4.473e-5  
0.385, 4.514e-5  
0.384, 4.548e-5  
0.383, 4.586e-5  
0.382, 4.627e-5  
0.381, 4.663e-5  
0.380, 4.705e-5  
0.379, 4.751e-5  
0.378, 4.787e-5  
0.377, 4.826e-5  
0.376, 4.871e-5  
0.375, 4.908e-5  
0.374, 4.948e-5  
0.373, 4.996e-5  
0.372, 5.036e-5  
0.371, 5.079e-5  
0.370, 5.129e-5  
0.369, 5.169e-5  
0.368, 5.214e-5  
0.367, 5.266e-5  
0.366, 5.305e-5  
0.365, 5.351e-5  
0.364, 5.402e-5  
0.363, 5.442e-5  
0.362, 5.485e-5  
0.361, 5.534e-5  
0.360, 5.573e-5  
0.359, 5.616e-5  
0.358, 5.658e-5  
0.357, 5.691e-5  
0.356, 5.732e-5  
0.355, 5.781e-5  
0.354, 5.822e-5  
0.353, 5.868e-5  
0.352, 5.920e-5  
0.351, 5.962e-5  
0.350, 6.010e-5  
0.349, 6.063e-5

0.348, 6.105e-5  
0.347, 6.150e-5  
0.346, 6.201e-5  
0.345, 6.242e-5  
0.344, 6.287e-5  
0.343, 6.341e-5  
0.342, 6.384e-5  
0.341, 6.434e-5  
0.340, 6.490e-5  
0.339, 6.528e-5  
0.338, 6.572e-5  
0.337, 6.624e-5  
0.336, 6.663e-5  
0.335, 6.709e-5  
0.334, 6.762e-5  
0.333, 6.805e-5  
0.332, 6.850e-5  
0.331, 6.901e-5  
0.330, 6.943e-5  
0.329, 6.988e-5  
0.328, 7.042e-5  
0.327, 7.085e-5  
0.326, 7.131e-5  
0.325, 7.187e-5  
0.324, 7.229e-5  
0.323, 7.273e-5  
0.322, 7.326e-5  
0.321, 7.365e-5  
0.320, 7.407e-5  
0.319, 7.459e-5  
0.318, 7.498e-5  
0.317, 7.538e-5  
0.316, 7.591e-5  
0.315, 7.633e-5  
0.314, 7.679e-5  
0.313, 7.735e-5  
0.312, 7.775e-5  
0.311, 7.822e-5  
0.310, 7.875e-5  
0.309, 7.917e-5  
0.308, 7.961e-5  
0.307, 8.016e-5  
0.306, 8.059e-5  
0.305, 8.103e-5  
0.304, 8.153e-5  
0.303, 8.194e-5  
0.302, 8.236e-5  
0.301, 8.289e-5  
0.300, 8.331e-5  
0.299, 8.376e-5

0.298, 8.429e-5  
0.297, 8.472e-5  
0.296, 8.519e-5  
0.295, 8.573e-5  
0.294, 8.616e-5  
0.293, 8.663e-5  
0.292, 8.719e-5  
0.291, 8.761e-5  
0.290, 8.808e-5  
0.289, 8.861e-5  
0.288, 8.902e-5  
0.287, 8.943e-5  
0.286, 8.993e-5  
0.285, 9.033e-5  
0.284, 9.080e-5  
0.283, 9.136e-5  
0.282, 9.181e-5  
0.281, 9.227e-5  
0.280, 9.279e-5  
0.279, 9.321e-5  
0.278, 9.366e-5  
0.277, 9.418e-5  
0.276, 9.457e-5  
0.275, 9.501e-5  
0.274, 9.554e-5  
0.273, 9.596e-5  
0.272, 9.644e-5  
0.271, 9.701e-5  
0.270, 9.748e-5  
0.269, 9.796e-5  
0.268, 9.856e-5  
0.267, 9.902e-5  
0.266, 9.948e-5  
0.265, 1.000e-4  
0.264, 1.005e-4  
0.263, 1.010e-4  
0.262, 1.015e-4  
0.261, 1.020e-4  
0.260, 1.025e-4  
0.259, 1.030e-4  
0.258, 1.035e-4  
0.257, 1.039e-4  
0.256, 1.045e-4  
0.255, 1.049e-4  
0.254, 1.053e-4  
0.253, 1.058e-4  
0.252, 1.063e-4  
0.251, 1.067e-4  
0.250, 1.072e-4  
0.249, 1.076e-4

0.248, 1.081e-4  
0.247, 1.086e-4  
0.246, 1.091e-4  
0.245, 1.095e-4  
0.244, 1.101e-4  
0.243, 1.105e-4  
0.242, 1.109e-4  
0.241, 1.115e-4  
0.240, 1.119e-4  
0.239, 1.124e-4  
0.238, 1.129e-4  
0.237, 1.134e-4  
0.236, 1.138e-4  
0.235, 1.144e-4  
0.234, 1.149e-4  
0.233, 1.154e-4  
0.232, 1.161e-4  
0.231, 1.166e-4  
0.230, 1.171e-4  
0.229, 1.178e-4  
0.228, 1.183e-4  
0.227, 1.188e-4  
0.226, 1.194e-4  
0.225, 1.198e-4  
0.224, 1.203e-4  
0.223, 1.208e-4  
0.222, 1.212e-4  
0.221, 1.217e-4  
0.220, 1.222e-4  
0.219, 1.227e-4  
0.218, 1.232e-4  
0.217, 1.238e-4  
0.216, 1.242e-4  
0.215, 1.248e-4  
0.214, 1.255e-4  
0.213, 1.260e-4  
0.212, 1.265e-4  
0.211, 1.271e-4  
0.210, 1.276e-4  
0.209, 1.281e-4  
0.208, 1.287e-4  
0.207, 1.291e-4  
0.206, 1.296e-4  
0.205, 1.302e-4  
0.204, 1.307e-4  
0.203, 1.313e-4  
0.202, 1.320e-4  
0.201, 1.325e-4  
0.200, 1.331e-4  
0.199, 1.338e-4

0.198, 1.343e-4  
0.197, 1.348e-4  
0.196, 1.355e-4  
0.195, 1.359e-4  
0.194, 1.363e-4  
0.193, 1.369e-4  
0.192, 1.373e-4  
0.191, 1.378e-4  
0.190, 1.385e-4  
0.189, 1.390e-4  
0.188, 1.394e-4  
0.187, 1.400e-4  
0.186, 1.405e-4  
0.185, 1.409e-4  
0.184, 1.415e-4  
0.183, 1.420e-4  
0.182, 1.426e-4  
0.181, 1.434e-4  
0.180, 1.439e-4  
0.179, 1.444e-4  
0.178, 1.451e-4  
0.177, 1.455e-4  
0.176, 1.459e-4  
0.175, 1.465e-4  
0.174, 1.469e-4  
0.173, 1.474e-4  
0.172, 1.480e-4  
0.171, 1.483e-4  
0.170, 1.487e-4  
0.169, 1.494e-4  
0.168, 1.499e-4  
0.167, 1.505e-4  
0.166, 1.512e-4  
0.165, 1.518e-4  
0.164, 1.523e-4  
0.163, 1.530e-4  
0.162, 1.534e-4  
0.161, 1.539e-4  
0.160, 1.546e-4  
0.159, 1.551e-4  
0.158, 1.557e-4  
0.157, 1.565e-4  
0.156, 1.569e-4  
0.155, 1.573e-4  
0.154, 1.581e-4  
0.153, 1.585e-4  
0.152, 1.591e-4  
0.151, 1.599e-4  
0.150, 1.605e-4  
0.149, 1.610e-4

0.148, 1.619e-4  
0.147, 1.625e-4  
0.146, 1.632e-4  
0.145, 1.641e-4  
0.144, 1.647e-4  
0.143, 1.653e-4  
0.142, 1.661e-4  
0.141, 1.667e-4  
0.140, 1.673e-4  
0.139, 1.681e-4  
0.138, 1.687e-4  
0.137, 1.693e-4  
0.136, 1.702e-4  
0.135, 1.707e-4  
0.134, 1.713e-4  
0.133, 1.721e-4  
0.132, 1.727e-4  
0.131, 1.733e-4  
0.130, 1.741e-4  
0.129, 1.748e-4  
0.128, 1.753e-4  
0.127, 1.761e-4  
0.126, 1.766e-4  
0.125, 1.772e-4  
0.124, 1.780e-4  
0.123, 1.786e-4  
0.122, 1.792e-4  
0.121, 1.801e-4  
0.120, 1.806e-4  
0.119, 1.811e-4  
0.118, 1.819e-4  
0.117, 1.823e-4  
0.116, 1.828e-4  
0.115, 1.835e-4  
0.114, 1.840e-4  
0.113, 1.845e-4  
0.112, 1.854e-4  
0.111, 1.860e-4  
0.110, 1.867e-4  
0.109, 1.878e-4  
0.108, 1.885e-4  
0.107, 1.892e-4  
0.106, 1.903e-4  
0.105, 1.910e-4  
0.104, 1.918e-4  
0.103, 1.929e-4  
0.102, 1.936e-4  
0.101, 1.944e-4  
0.100, 1.954e-4  
0.099, 1.960e-4

0.098, 1.968e-4  
0.097, 1.980e-4  
0.096, 1.988e-4  
0.095, 1.996e-4  
0.094, 2.007e-4  
0.093, 2.015e-4  
0.092, 2.023e-4  
0.091, 2.033e-4  
0.090, 2.040e-4  
0.089, 2.047e-4  
0.088, 2.058e-4  
0.087, 2.065e-4  
0.086, 2.071e-4  
0.085, 2.080e-4  
0.084, 2.084e-4  
0.083, 2.089e-4  
0.082, 2.101e-4  
0.081, 2.109e-4  
0.080, 2.118e-4  
0.079, 2.131e-4  
0.078, 2.136e-4  
0.077, 2.141e-4  
0.076, 2.149e-4  
0.075, 2.155e-4  
0.074, 2.163e-4  
0.073, 2.176e-4  
0.072, 2.184e-4  
0.071, 2.193e-4  
0.070, 2.206e-4  
0.069, 2.213e-4  
0.068, 2.221e-4  
0.067, 2.232e-4  
0.066, 2.238e-4  
0.065, 2.244e-4  
0.064, 2.254e-4  
0.063, 2.259e-4  
0.062, 2.264e-4  
0.061, 2.274e-4  
0.060, 2.280e-4  
0.059, 2.286e-4  
0.058, 2.297e-4  
0.057, 2.304e-4  
0.056, 2.312e-4  
0.055, 2.324e-4  
0.054, 2.332e-4  
0.053, 2.339e-4  
0.052, 2.350e-4  
0.051, 2.356e-4  
0.050, 2.363e-4  
0.049, 2.373e-4



0.048, 2.379e-4  
0.047, 2.386e-4  
0.046, 2.396e-4  
0.045, 2.402e-4  
0.044, 2.408e-4  
0.043, 2.418e-4  
0.042, 2.423e-4  
0.041, 2.427e-4  
0.040, 2.434e-4  
0.039, 2.437e-4  
0.038, 2.441e-4  
0.037, 2.451e-4  
0.036, 2.458e-4  
0.035, 2.465e-4  
0.034, 2.474e-4  
0.033, 2.479e-4  
0.032, 2.485e-4  
0.031, 2.494e-4  
0.030, 2.498e-4  
0.029, 2.502e-4  
0.028, 2.510e-4  
0.027, 2.516e-4  
0.026, 2.525e-4  
0.025, 2.538e-4  
0.024, 2.545e-4  
0.023, 2.553e-4  
0.022, 2.562e-4  
0.021, 2.567e-4  
0.020, 2.573e-4  
0.019, 2.582e-4  
0.018, 2.586e-4  
0.017, 2.592e-4  
0.016, 2.600e-4  
0.015, 2.603e-4  
0.014, 2.607e-4  
0.013, 2.615e-4  
0.012, 2.618e-4  
0.011, 2.623e-4  
0.010, 2.631e-4  
0.009, 2.634e-4  
0.008, 2.638e-4  
0.007, 2.645e-4  
0.006, 2.648e-4  
0.005, 2.653e-4  
0.004, 2.662e-4  
0.003, 2.665e-4  
0.002, 2.669e-4  
0.001, 2.677e-4  
0.000, 2.681e-4  
-0.001, 2.686e-4

-0.002, 2.696e-4  
-0.003, 2.700e-4  
-0.004, 2.706e-4  
-0.005, 2.714e-4  
-0.006, 2.716e-4  
-0.007, 2.722e-4  
-0.008, 2.730e-4  
-0.009, 2.735e-4  
-0.010, 2.741e-4  
-0.011, 2.750e-4  
-0.012, 2.754e-4  
-0.013, 2.758e-4  
-0.014, 2.764e-4  
-0.015, 2.764e-4  
-0.016, 2.766e-4  
-0.017, 2.770e-4  
-0.018, 2.770e-4  
-0.019, 2.773e-4  
-0.020, 2.778e-4  
-0.021, 2.780e-4  
-0.022, 2.784e-4  
-0.023, 2.794e-4  
-0.024, 2.799e-4  
-0.025, 2.805e-4  
-0.026, 2.815e-4  
-0.027, 2.819e-4  
-0.028, 2.824e-4  
-0.029, 2.831e-4  
-0.030, 2.834e-4  
-0.031, 2.838e-4  
-0.032, 2.845e-4  
-0.033, 2.847e-4  
-0.034, 2.851e-4  
-0.035, 2.855e-4  
-0.036, 2.855e-4  
-0.037, 2.857e-4  
-0.038, 2.861e-4  
-0.039, 2.862e-4  
-0.040, 2.866e-4  
-0.041, 2.873e-4  
-0.042, 2.874e-4  
-0.043, 2.877e-4  
-0.044, 2.882e-4  
-0.045, 2.883e-4  
-0.046, 2.889e-4  
-0.047, 2.898e-4  
-0.048, 2.905e-4  
-0.049, 2.913e-4  
-0.050, 2.922e-4  
-0.051, 2.925e-4

-0.052, 2.931e-4  
-0.053, 2.936e-4  
-0.054, 2.936e-4  
-0.055, 2.938e-4  
-0.056, 2.940e-4  
-0.057, 2.938e-4  
-0.058, 2.939e-4  
-0.059, 2.941e-4  
-0.060, 2.939e-4  
-0.061, 2.939e-4  
-0.062, 2.941e-4  
-0.063, 2.938e-4  
-0.064, 2.939e-4  
-0.065, 2.944e-4  
-0.066, 2.948e-4  
-0.067, 2.956e-4  
-0.068, 2.967e-4  
-0.069, 2.970e-4  
-0.070, 2.975e-4  
-0.071, 2.981e-4  
-0.072, 2.981e-4  
-0.073, 2.984e-4  
-0.074, 2.989e-4  
-0.075, 2.988e-4  
-0.076, 2.990e-4  
-0.077, 2.993e-4  
-0.078, 2.992e-4  
-0.079, 2.996e-4  
-0.080, 3.001e-4  
-0.081, 3.001e-4  
-0.082, 3.004e-4  
-0.083, 3.008e-4  
-0.084, 3.006e-4  
-0.085, 3.007e-4  
-0.086, 3.010e-4  
-0.087, 3.008e-4  
-0.088, 3.010e-4  
-0.089, 3.015e-4  
-0.090, 3.015e-4  
-0.091, 3.019e-4  
-0.092, 3.025e-4  
-0.093, 3.026e-4  
-0.094, 3.031e-4  
-0.095, 3.037e-4  
-0.096, 3.039e-4  
-0.097, 3.045e-4  
-0.098, 3.052e-4  
-0.099, 3.055e-4  
-0.100, 3.061e-4  
-0.101, 3.067e-4

-0.102, 3.068e-4  
-0.103, 3.072e-4  
-0.104, 3.078e-4  
-0.105, 3.078e-4  
-0.106, 3.081e-4  
-0.107, 3.085e-4  
-0.108, 3.083e-4  
-0.109, 3.084e-4  
-0.110, 3.085e-4  
-0.111, 3.081e-4  
-0.112, 3.080e-4  
-0.113, 3.081e-4  
-0.114, 3.078e-4  
-0.115, 3.080e-4  
-0.116, 3.083e-4  
-0.117, 3.083e-4  
-0.118, 3.085e-4  
-0.119, 3.087e-4  
-0.120, 3.084e-4  
-0.121, 3.085e-4  
-0.122, 3.087e-4  
-0.123, 3.085e-4  
-0.124, 3.087e-4  
-0.125, 3.088e-4  
-0.126, 3.083e-4  
-0.127, 3.084e-4  
-0.128, 3.087e-4  
-0.129, 3.087e-4  
-0.130, 3.091e-4  
-0.131, 3.095e-4  
-0.132, 3.095e-4  
-0.133, 3.100e-4  
-0.134, 3.105e-4  
-0.135, 3.104e-4  
-0.136, 3.108e-4  
-0.137, 3.111e-4  
-0.138, 3.109e-4  
-0.139, 3.114e-4  
-0.140, 3.116e-4  
-0.141, 3.114e-4  
-0.142, 3.118e-4  
-0.143, 3.123e-4  
-0.144, 3.124e-4  
-0.145, 3.133e-4  
-0.146, 3.140e-4  
-0.147, 3.140e-4  
-0.148, 3.143e-4  
-0.149, 3.145e-4  
-0.150, 3.140e-4  
-0.151, 3.143e-4

-0.152, 3.146e-4  
-0.153, 3.145e-4  
-0.154, 3.150e-4  
-0.155, 3.153e-4  
-0.156, 3.149e-4  
-0.157, 3.147e-4  
-0.158, 3.147e-4  
-0.159, 3.140e-4  
-0.160, 3.143e-4  
-0.161, 3.147e-4  
-0.162, 3.145e-4  
-0.163, 3.149e-4  
-0.164, 3.153e-4  
-0.165, 3.152e-4  
-0.166, 3.157e-4  
-0.167, 3.161e-4  
-0.168, 3.158e-4  
-0.169, 3.160e-4  
-0.170, 3.162e-4  
-0.171, 3.158e-4  
-0.172, 3.161e-4  
-0.173, 3.165e-4  
-0.174, 3.163e-4  
-0.175, 3.166e-4  
-0.176, 3.167e-4  
-0.177, 3.162e-4  
-0.178, 3.164e-4  
-0.179, 3.167e-4  
-0.180, 3.164e-4  
-0.181, 3.165e-4  
-0.182, 3.165e-4  
-0.183, 3.157e-4  
-0.184, 3.156e-4  
-0.185, 3.154e-4  
-0.186, 3.147e-4  
-0.187, 3.148e-4  
-0.188, 3.150e-4  
-0.189, 3.148e-4  
-0.190, 3.152e-4  
-0.191, 3.156e-4  
-0.192, 3.152e-4  
-0.193, 3.154e-4  
-0.194, 3.153e-4  
-0.195, 3.148e-4  
-0.196, 3.150e-4  
-0.197, 3.152e-4  
-0.198, 3.149e-4  
-0.199, 3.152e-4  
-0.200, 3.152e-4  
-0.201, 3.145e-4

-0.202, 3.146e-4  
-0.203, 3.146e-4  
-0.204, 3.141e-4  
-0.205, 3.142e-4  
-0.206, 3.141e-4  
-0.207, 3.134e-4  
-0.208, 3.135e-4  
-0.209, 3.135e-4  
-0.210, 3.129e-4  
-0.211, 3.131e-4  
-0.212, 3.132e-4  
-0.213, 3.127e-4  
-0.214, 3.132e-4  
-0.215, 3.137e-4  
-0.216, 3.135e-4  
-0.217, 3.141e-4  
-0.218, 3.145e-4  
-0.219, 3.142e-4  
-0.220, 3.147e-4  
-0.221, 3.148e-4  
-0.222, 3.142e-4  
-0.223, 3.143e-4  
-0.224, 3.142e-4  
-0.225, 3.133e-4  
-0.226, 3.130e-4  
-0.227, 3.125e-4  
-0.228, 3.116e-4  
-0.229, 3.116e-4  
-0.230, 3.116e-4  
-0.231, 3.107e-4  
-0.232, 3.105e-4  
-0.233, 3.103e-4  
-0.234, 3.093e-4  
-0.235, 3.092e-4  
-0.236, 3.092e-4  
-0.237, 3.084e-4  
-0.238, 3.086e-4  
-0.239, 3.089e-4  
-0.240, 3.084e-4  
-0.241, 3.087e-4  
-0.242, 3.090e-4  
-0.243, 3.085e-4  
-0.244, 3.090e-4  
-0.245, 3.094e-4  
-0.246, 3.093e-4  
-0.247, 3.099e-4  
-0.248, 3.102e-4  
-0.249, 3.096e-4  
-0.250, 3.096e-4  
-0.251, 3.094e-4

-0.252, 3.086e-4  
-0.253, 3.085e-4  
-0.254, 3.085e-4  
-0.255, 3.076e-4  
-0.256, 3.075e-4  
-0.257, 3.075e-4  
-0.258, 3.070e-4  
-0.259, 3.073e-4  
-0.260, 3.076e-4  
-0.261, 3.071e-4  
-0.262, 3.073e-4  
-0.263, 3.075e-4  
-0.264, 3.068e-4  
-0.265, 3.069e-4  
-0.266, 3.071e-4  
-0.267, 3.067e-4  
-0.268, 3.070e-4  
-0.269, 3.075e-4  
-0.270, 3.072e-4  
-0.271, 3.076e-4  
-0.272, 3.082e-4  
-0.273, 3.081e-4  
-0.274, 3.087e-4  
-0.275, 3.094e-4  
-0.276, 3.090e-4  
-0.277, 3.094e-4  
-0.278, 3.102e-4  
-0.279, 3.100e-4  
-0.280, 3.106e-4  
-0.281, 3.115e-4  
-0.282, 3.113e-4  
-0.283, 3.120e-4  
-0.284, 3.133e-4  
-0.285, 3.136e-4  
-0.286, 3.147e-4  
-0.287, 3.164e-4  
-0.288, 3.170e-4  
-0.289, 3.185e-4  
-0.290, 3.205e-4  
-0.291, 3.212e-4  
-0.292, 3.226e-4  
-0.293, 3.247e-4  
-0.294, 3.254e-4  
-0.295, 3.268e-4  
-0.296, 3.291e-4  
-0.297, 3.297e-4  
-0.298, 3.310e-4  
-0.299, 3.332e-4  
-0.300, 3.335e-4  
-0.301, 3.345e-4

-0.302, 3.368e-4  
-0.303, 3.371e-4  
-0.304, 3.383e-4  
-0.305, 3.412e-4  
-0.306, 3.422e-4  
-0.307, 3.444e-4  
-0.308, 3.482e-4  
-0.309, 3.497e-4  
-0.310, 3.521e-4  
-0.311, 3.564e-4  
-0.312, 3.585e-4  
-0.313, 3.614e-4  
-0.314, 3.652e-4  
-0.315, 3.663e-4  
-0.316, 3.683e-4  
-0.317, 3.723e-4  
-0.318, 3.739e-4  
-0.319, 3.762e-4  
-0.320, 3.804e-4  
-0.321, 3.816e-4  
-0.322, 3.834e-4  
-0.323, 3.874e-4  
-0.324, 3.884e-4  
-0.325, 3.899e-4  
-0.326, 3.937e-4  
-0.327, 3.947e-4  
-0.328, 3.967e-4  
-0.329, 4.012e-4  
-0.330, 4.026e-4  
-0.331, 4.047e-4  
-0.332, 4.088e-4  
-0.333, 4.098e-4  
-0.334, 4.117e-4  
-0.335, 4.155e-4  
-0.336, 4.163e-4  
-0.337, 4.189e-4  
-0.338, 4.238e-4  
-0.339, 4.253e-4  
-0.340, 4.270e-4  
-0.341, 4.305e-4  
-0.342, 4.310e-4  
-0.343, 4.324e-4  
-0.344, 4.358e-4  
-0.345, 4.362e-4  
-0.346, 4.375e-4  
-0.347, 4.408e-4  
-0.348, 4.412e-4  
-0.349, 4.427e-4  
-0.350, 4.465e-4  
-0.351, 4.476e-4



-0.352, 4.495e-4  
-0.353, 4.532e-4  
-0.354, 4.538e-4  
-0.355, 4.552e-4  
-0.356, 4.582e-4  
-0.357, 4.583e-4  
-0.358, 4.595e-4  
-0.359, 4.626e-4  
-0.360, 4.626e-4  
-0.361, 4.634e-4  
-0.362, 4.664e-4  
-0.363, 4.670e-4  
-0.364, 4.690e-4  
-0.365, 4.728e-4  
-0.366, 4.735e-4  
-0.367, 4.748e-4  
-0.368, 4.779e-4  
-0.369, 4.786e-4  
-0.370, 4.801e-4  
-0.371, 4.830e-4  
-0.372, 4.831e-4  
-0.373, 4.840e-4  
-0.374, 4.865e-4  
-0.375, 4.864e-4  
-0.376, 4.873e-4  
-0.377, 4.898e-4  
-0.378, 4.896e-4  
-0.379, 4.903e-4  
-0.380, 4.927e-4  
-0.381, 4.924e-4  
-0.382, 4.931e-4  
-0.383, 4.953e-4  
-0.384, 4.951e-4  
-0.385, 4.953e-4  
-0.386, 4.972e-4  
-0.387, 4.964e-4  
-0.388, 4.964e-4  
-0.389, 4.979e-4  
-0.390, 4.970e-4  
-0.391, 4.972e-4  
-0.392, 4.989e-4  
-0.393, 4.984e-4  
-0.394, 4.988e-4  
-0.395, 5.012e-4  
-0.396, 5.014e-4  
-0.397, 5.024e-4  
-0.398, 5.052e-4  
-0.399, 5.055e-4

Mar. 29, 2021 04:26:16  
Linear Sweep Voltammetry

File: c:\users\shadji04\desktop\sofia cv\29032021\sweep scan under oxygen ph  
2.5\1000 rpm.txt

Data Source: Experiment

Instrument Model: CHI650E

Header:

Note: 1000 rpm

Init E (V) = 0.8

Final E (V) = -0.4

Scan Rate (V/s) = 0.025

Sample Interval (V) = 0.001

Quiet Time (sec) = 2

Sensitivity (A/V) = 0.01

Potential/V, Current/A

0.800, -5.706e-5

0.799, -5.668e-5

0.798, -5.627e-5

0.797, -5.585e-5

0.796, -5.552e-5

0.795, -5.514e-5

0.794, -5.482e-5

0.793, -5.459e-5

0.792, -5.421e-5

0.791, -5.371e-5

0.790, -5.340e-5

0.789, -5.316e-5

0.788, -5.296e-5

0.787, -5.234e-5

0.786, -5.199e-5

0.785, -5.191e-5

0.784, -5.157e-5

0.783, -5.135e-5

0.782, -5.104e-5

0.781, -5.089e-5

0.780, -5.049e-5

0.779, -5.035e-5

0.778, -5.002e-5

0.777, -4.937e-5

0.776, -4.908e-5

0.775, -4.878e-5

0.774, -4.865e-5

0.773, -4.849e-5

0.772, -4.794e-5

0.771, -4.777e-5

0.770, -4.757e-5

0.769, -4.738e-5

0.768, -4.697e-5

0.767, -4.652e-5

0.766, -4.640e-5

0.765, -4.614e-5

0.764, -4.585e-5

0.763, -4.541e-5  
0.762, -4.526e-5  
0.761, -4.491e-5  
0.760, -4.446e-5  
0.759, -4.390e-5  
0.758, -4.387e-5  
0.757, -4.380e-5  
0.756, -4.331e-5  
0.755, -4.326e-5  
0.754, -4.308e-5  
0.753, -4.282e-5  
0.752, -4.265e-5  
0.751, -4.237e-5  
0.750, -4.211e-5  
0.749, -4.180e-5  
0.748, -4.161e-5  
0.747, -4.131e-5  
0.746, -4.109e-5  
0.745, -4.093e-5  
0.744, -4.061e-5  
0.743, -4.028e-5  
0.742, -4.013e-5  
0.741, -3.981e-5  
0.740, -3.959e-5  
0.739, -3.928e-5  
0.738, -3.895e-5  
0.737, -3.870e-5  
0.736, -3.847e-5  
0.735, -3.820e-5  
0.734, -3.794e-5  
0.733, -3.788e-5  
0.732, -3.760e-5  
0.731, -3.726e-5  
0.730, -3.695e-5  
0.729, -3.691e-5  
0.728, -3.674e-5  
0.727, -3.663e-5  
0.726, -3.634e-5  
0.725, -3.618e-5  
0.724, -3.603e-5  
0.723, -3.565e-5  
0.722, -3.532e-5  
0.721, -3.523e-5  
0.720, -3.504e-5  
0.719, -3.489e-5  
0.718, -3.476e-5  
0.717, -3.441e-5  
0.716, -3.416e-5  
0.715, -3.386e-5  
0.714, -3.364e-5

0.713, -3.350e-5  
0.712, -3.327e-5  
0.711, -3.304e-5  
0.710, -3.289e-5  
0.709, -3.278e-5  
0.708, -3.247e-5  
0.707, -3.229e-5  
0.706, -3.222e-5  
0.705, -3.199e-5  
0.704, -3.178e-5  
0.703, -3.160e-5  
0.702, -3.132e-5  
0.701, -3.113e-5  
0.700, -3.107e-5  
0.699, -3.093e-5  
0.698, -3.077e-5  
0.697, -3.057e-5  
0.696, -2.997e-5  
0.695, -3.000e-5  
0.694, -2.999e-5  
0.693, -2.985e-5  
0.692, -2.973e-5  
0.691, -2.948e-5  
0.690, -2.933e-5  
0.689, -2.924e-5  
0.688, -2.903e-5  
0.687, -2.871e-5  
0.686, -2.862e-5  
0.685, -2.836e-5  
0.684, -2.824e-5  
0.683, -2.828e-5  
0.682, -2.808e-5  
0.681, -2.799e-5  
0.680, -2.789e-5  
0.679, -2.776e-5  
0.678, -2.758e-5  
0.677, -2.745e-5  
0.676, -2.720e-5  
0.675, -2.706e-5  
0.674, -2.695e-5  
0.673, -2.671e-5  
0.672, -2.661e-5  
0.671, -2.656e-5  
0.670, -2.625e-5  
0.669, -2.609e-5  
0.668, -2.600e-5  
0.667, -2.576e-5  
0.666, -2.562e-5  
0.665, -2.563e-5  
0.664, -2.571e-5

0.663, -2.544e-5  
0.662, -2.517e-5  
0.661, -2.500e-5  
0.660, -2.485e-5  
0.659, -2.476e-5  
0.658, -2.469e-5  
0.657, -2.470e-5  
0.656, -2.454e-5  
0.655, -2.455e-5  
0.654, -2.433e-5  
0.653, -2.403e-5  
0.652, -2.420e-5  
0.651, -2.388e-5  
0.650, -2.383e-5  
0.649, -2.392e-5  
0.648, -2.394e-5  
0.647, -2.392e-5  
0.646, -2.382e-5  
0.645, -2.340e-5  
0.644, -2.316e-5  
0.643, -2.332e-5  
0.642, -2.318e-5  
0.641, -2.291e-5  
0.640, -2.290e-5  
0.639, -2.272e-5  
0.638, -2.270e-5  
0.637, -2.282e-5  
0.636, -2.266e-5  
0.635, -2.264e-5  
0.634, -2.241e-5  
0.633, -2.224e-5  
0.632, -2.217e-5  
0.631, -2.222e-5  
0.630, -2.214e-5  
0.629, -2.207e-5  
0.628, -2.189e-5  
0.627, -2.171e-5  
0.626, -2.176e-5  
0.625, -2.172e-5  
0.624, -2.153e-5  
0.623, -2.142e-5  
0.622, -2.117e-5  
0.621, -2.091e-5  
0.620, -2.089e-5  
0.619, -2.100e-5  
0.618, -2.081e-5  
0.617, -2.081e-5  
0.616, -2.079e-5  
0.615, -2.070e-5  
0.614, -2.071e-5

0.613, -2.064e-5  
0.612, -2.038e-5  
0.611, -2.035e-5  
0.610, -2.017e-5  
0.609, -1.983e-5  
0.608, -1.982e-5  
0.607, -1.963e-5  
0.606, -1.967e-5  
0.605, -1.972e-5  
0.604, -1.965e-5  
0.603, -1.960e-5  
0.602, -1.950e-5  
0.601, -1.938e-5  
0.600, -1.937e-5  
0.599, -1.927e-5  
0.598, -1.914e-5  
0.597, -1.906e-5  
0.596, -1.901e-5  
0.595, -1.887e-5  
0.594, -1.879e-5  
0.593, -1.872e-5  
0.592, -1.862e-5  
0.591, -1.841e-5  
0.590, -1.841e-5  
0.589, -1.844e-5  
0.588, -1.818e-5  
0.587, -1.793e-5  
0.586, -1.780e-5  
0.585, -1.780e-5  
0.584, -1.775e-5  
0.583, -1.740e-5  
0.582, -1.741e-5  
0.581, -1.729e-5  
0.580, -1.720e-5  
0.579, -1.719e-5  
0.578, -1.739e-5  
0.577, -1.721e-5  
0.576, -1.706e-5  
0.575, -1.698e-5  
0.574, -1.695e-5  
0.573, -1.678e-5  
0.572, -1.682e-5  
0.571, -1.663e-5  
0.570, -1.640e-5  
0.569, -1.633e-5  
0.568, -1.617e-5  
0.567, -1.591e-5  
0.566, -1.598e-5  
0.565, -1.601e-5  
0.564, -1.591e-5

0.563, -1.570e-5  
0.562, -1.537e-5  
0.561, -1.535e-5  
0.560, -1.513e-5  
0.559, -1.515e-5  
0.558, -1.497e-5  
0.557, -1.501e-5  
0.556, -1.478e-5  
0.555, -1.447e-5  
0.554, -1.441e-5  
0.553, -1.447e-5  
0.552, -1.427e-5  
0.551, -1.422e-5  
0.550, -1.397e-5  
0.549, -1.372e-5  
0.548, -1.374e-5  
0.547, -1.365e-5  
0.546, -1.348e-5  
0.545, -1.339e-5  
0.544, -1.335e-5  
0.543, -1.308e-5  
0.542, -1.293e-5  
0.541, -1.289e-5  
0.540, -1.262e-5  
0.539, -1.247e-5  
0.538, -1.231e-5  
0.537, -1.217e-5  
0.536, -1.206e-5  
0.535, -1.186e-5  
0.534, -1.163e-5  
0.533, -1.155e-5  
0.532, -1.129e-5  
0.531, -1.106e-5  
0.530, -1.074e-5  
0.529, -1.075e-5  
0.528, -1.048e-5  
0.527, -1.034e-5  
0.526, -1.018e-5  
0.525, -9.928e-6  
0.524, -9.791e-6  
0.523, -9.594e-6  
0.522, -9.358e-6  
0.521, -9.162e-6  
0.520, -8.848e-6  
0.519, -8.356e-6  
0.518, -8.337e-6  
0.517, -7.944e-6  
0.516, -7.669e-6  
0.515, -7.600e-6  
0.514, -7.207e-6

0.513, -6.755e-6  
0.512, -6.775e-6  
0.511, -6.676e-6  
0.510, -6.225e-6  
0.509, -6.087e-6  
0.508, -5.881e-6  
0.507, -5.556e-6  
0.506, -5.242e-6  
0.505, -5.055e-6  
0.504, -4.859e-6  
0.503, -4.328e-6  
0.502, -4.122e-6  
0.501, -3.827e-6  
0.500, -3.552e-6  
0.499, -3.307e-6  
0.498, -2.963e-6  
0.497, -2.649e-6  
0.496, -2.423e-6  
0.495, -2.059e-6  
0.494, -1.814e-6  
0.493, -1.480e-6  
0.492, -1.018e-6  
0.491, -6.445e-7  
0.490, -2.417e-7  
0.489, 4.165e-7  
0.488, 6.425e-7  
0.487, 6.818e-7  
0.486, 1.045e-6  
0.485, 1.595e-6  
0.484, 2.155e-6  
0.483, 2.440e-6  
0.482, 2.666e-6  
0.481, 3.079e-6  
0.480, 3.462e-6  
0.479, 3.992e-6  
0.478, 4.444e-6  
0.477, 4.936e-6  
0.476, 5.250e-6  
0.475, 5.722e-6  
0.474, 5.957e-6  
0.473, 6.370e-6  
0.472, 6.940e-6  
0.471, 7.392e-6  
0.470, 7.686e-6  
0.469, 8.138e-6  
0.468, 8.688e-6  
0.467, 9.091e-6  
0.466, 9.533e-6  
0.465, 1.003e-5  
0.464, 1.041e-5



0.463, 1.083e-5  
0.462, 1.128e-5  
0.461, 1.176e-5  
0.460, 1.232e-5  
0.459, 1.289e-5  
0.458, 1.319e-5  
0.457, 1.379e-5  
0.456, 1.428e-5  
0.455, 1.465e-5  
0.454, 1.514e-5  
0.453, 1.564e-5  
0.452, 1.604e-5  
0.451, 1.653e-5  
0.450, 1.750e-5  
0.449, 1.781e-5  
0.448, 1.822e-5  
0.447, 1.853e-5  
0.446, 1.921e-5  
0.445, 1.958e-5  
0.444, 1.996e-5  
0.443, 2.037e-5  
0.442, 2.087e-5  
0.441, 2.132e-5  
0.440, 2.174e-5  
0.439, 2.229e-5  
0.438, 2.285e-5  
0.437, 2.328e-5  
0.436, 2.385e-5  
0.435, 2.435e-5  
0.434, 2.465e-5  
0.433, 2.533e-5  
0.432, 2.616e-5  
0.431, 2.634e-5  
0.430, 2.672e-5  
0.429, 2.721e-5  
0.428, 2.777e-5  
0.427, 2.835e-5  
0.426, 2.865e-5  
0.425, 2.897e-5  
0.424, 2.950e-5  
0.423, 2.990e-5  
0.422, 3.034e-5  
0.421, 3.085e-5  
0.420, 3.126e-5  
0.419, 3.167e-5  
0.418, 3.213e-5  
0.417, 3.269e-5  
0.416, 3.314e-5  
0.415, 3.392e-5  
0.414, 3.427e-5

0.413, 3.430e-5  
0.412, 3.472e-5  
0.411, 3.525e-5  
0.410, 3.570e-5  
0.409, 3.620e-5  
0.408, 3.661e-5  
0.407, 3.684e-5  
0.406, 3.731e-5  
0.405, 3.759e-5  
0.404, 3.794e-5  
0.403, 3.833e-5  
0.402, 3.880e-5  
0.401, 3.912e-5  
0.400, 3.965e-5  
0.399, 4.028e-5  
0.398, 4.070e-5  
0.397, 4.111e-5  
0.396, 4.166e-5  
0.395, 4.213e-5  
0.394, 4.274e-5  
0.393, 4.318e-5  
0.392, 4.334e-5  
0.391, 4.375e-5  
0.390, 4.403e-5  
0.389, 4.443e-5  
0.388, 4.485e-5  
0.387, 4.525e-5  
0.386, 4.571e-5  
0.385, 4.614e-5  
0.384, 4.679e-5  
0.383, 4.716e-5  
0.382, 4.734e-5  
0.381, 4.767e-5  
0.380, 4.811e-5  
0.379, 4.884e-5  
0.378, 4.949e-5  
0.377, 5.004e-5  
0.376, 5.047e-5  
0.375, 5.082e-5  
0.374, 5.100e-5  
0.373, 5.159e-5  
0.372, 5.194e-5  
0.371, 5.229e-5  
0.370, 5.280e-5  
0.369, 5.337e-5  
0.368, 5.391e-5  
0.367, 5.433e-5  
0.366, 5.466e-5  
0.365, 5.531e-5  
0.364, 5.585e-5

0.363, 5.602e-5  
0.362, 5.627e-5  
0.361, 5.687e-5  
0.360, 5.732e-5  
0.359, 5.779e-5  
0.358, 5.844e-5  
0.357, 5.887e-5  
0.356, 5.926e-5  
0.355, 5.997e-5  
0.354, 6.046e-5  
0.353, 6.084e-5  
0.352, 6.131e-5  
0.351, 6.173e-5  
0.350, 6.205e-5  
0.349, 6.250e-5  
0.348, 6.305e-5  
0.347, 6.341e-5  
0.346, 6.438e-5  
0.345, 6.475e-5  
0.344, 6.510e-5  
0.343, 6.553e-5  
0.342, 6.612e-5  
0.341, 6.648e-5  
0.340, 6.691e-5  
0.339, 6.765e-5  
0.338, 6.814e-5  
0.337, 6.883e-5  
0.336, 6.935e-5  
0.335, 6.950e-5  
0.334, 6.987e-5  
0.333, 7.040e-5  
0.332, 7.080e-5  
0.331, 7.143e-5  
0.330, 7.200e-5  
0.329, 7.241e-5  
0.328, 7.312e-5  
0.327, 7.386e-5  
0.326, 7.442e-5  
0.325, 7.492e-5  
0.324, 7.546e-5  
0.323, 7.586e-5  
0.322, 7.609e-5  
0.321, 7.641e-5  
0.320, 7.688e-5  
0.319, 7.750e-5  
0.318, 7.798e-5  
0.317, 7.840e-5  
0.316, 7.898e-5  
0.315, 7.941e-5  
0.314, 7.985e-5

0.313, 8.067e-5  
0.312, 8.115e-5  
0.311, 8.173e-5  
0.310, 8.241e-5  
0.309, 8.268e-5  
0.308, 8.309e-5  
0.307, 8.358e-5  
0.306, 8.401e-5  
0.305, 8.451e-5  
0.304, 8.491e-5  
0.303, 8.550e-5  
0.302, 8.639e-5  
0.301, 8.703e-5  
0.300, 8.746e-5  
0.299, 8.769e-5  
0.298, 8.813e-5  
0.297, 8.857e-5  
0.296, 8.884e-5  
0.295, 8.947e-5  
0.294, 8.989e-5  
0.293, 9.054e-5  
0.292, 9.099e-5  
0.291, 9.150e-5  
0.290, 9.205e-5  
0.289, 9.256e-5  
0.288, 9.317e-5  
0.287, 9.372e-5  
0.286, 9.421e-5  
0.285, 9.466e-5  
0.284, 9.529e-5  
0.283, 9.592e-5  
0.282, 9.645e-5  
0.281, 9.673e-5  
0.280, 9.729e-5  
0.279, 9.768e-5  
0.278, 9.820e-5  
0.277, 9.883e-5  
0.276, 9.939e-5  
0.275, 9.998e-5  
0.274, 1.005e-4  
0.273, 1.011e-4  
0.272, 1.016e-4  
0.271, 1.020e-4  
0.270, 1.023e-4  
0.269, 1.026e-4  
0.268, 1.029e-4  
0.267, 1.033e-4  
0.266, 1.036e-4  
0.265, 1.041e-4  
0.264, 1.047e-4

0.263, 1.053e-4  
0.262, 1.060e-4  
0.261, 1.065e-4  
0.260, 1.070e-4  
0.259, 1.078e-4  
0.258, 1.084e-4  
0.257, 1.088e-4  
0.256, 1.094e-4  
0.255, 1.102e-4  
0.254, 1.106e-4  
0.253, 1.114e-4  
0.252, 1.119e-4  
0.251, 1.121e-4  
0.250, 1.127e-4  
0.249, 1.135e-4  
0.248, 1.140e-4  
0.247, 1.144e-4  
0.246, 1.149e-4  
0.245, 1.153e-4  
0.244, 1.158e-4  
0.243, 1.164e-4  
0.242, 1.171e-4  
0.241, 1.175e-4  
0.240, 1.179e-4  
0.239, 1.184e-4  
0.238, 1.189e-4  
0.237, 1.194e-4  
0.236, 1.203e-4  
0.235, 1.209e-4  
0.234, 1.213e-4  
0.233, 1.218e-4  
0.232, 1.224e-4  
0.231, 1.230e-4  
0.230, 1.237e-4  
0.229, 1.246e-4  
0.228, 1.250e-4  
0.227, 1.251e-4  
0.226, 1.255e-4  
0.225, 1.258e-4  
0.224, 1.264e-4  
0.223, 1.271e-4  
0.222, 1.277e-4  
0.221, 1.281e-4  
0.220, 1.287e-4  
0.219, 1.292e-4  
0.218, 1.298e-4  
0.217, 1.305e-4  
0.216, 1.310e-4  
0.215, 1.316e-4  
0.214, 1.326e-4

0.213, 1.330e-4  
0.212, 1.333e-4  
0.211, 1.339e-4  
0.210, 1.345e-4  
0.209, 1.348e-4  
0.208, 1.353e-4  
0.207, 1.358e-4  
0.206, 1.363e-4  
0.205, 1.373e-4  
0.204, 1.381e-4  
0.203, 1.387e-4  
0.202, 1.393e-4  
0.201, 1.398e-4  
0.200, 1.403e-4  
0.199, 1.409e-4  
0.198, 1.417e-4  
0.197, 1.424e-4  
0.196, 1.429e-4  
0.195, 1.435e-4  
0.194, 1.438e-4  
0.193, 1.441e-4  
0.192, 1.446e-4  
0.191, 1.452e-4  
0.190, 1.459e-4  
0.189, 1.465e-4  
0.188, 1.470e-4  
0.187, 1.476e-4  
0.186, 1.485e-4  
0.185, 1.493e-4  
0.184, 1.500e-4  
0.183, 1.504e-4  
0.182, 1.510e-4  
0.181, 1.514e-4  
0.180, 1.518e-4  
0.179, 1.519e-4  
0.178, 1.523e-4  
0.177, 1.532e-4  
0.176, 1.543e-4  
0.175, 1.553e-4  
0.174, 1.559e-4  
0.173, 1.560e-4  
0.172, 1.564e-4  
0.171, 1.570e-4  
0.170, 1.580e-4  
0.169, 1.592e-4  
0.168, 1.603e-4  
0.167, 1.608e-4  
0.166, 1.614e-4  
0.165, 1.621e-4  
0.164, 1.627e-4

0.163, 1.633e-4  
0.162, 1.640e-4  
0.161, 1.645e-4  
0.160, 1.653e-4  
0.159, 1.658e-4  
0.158, 1.662e-4  
0.157, 1.666e-4  
0.156, 1.669e-4  
0.155, 1.672e-4  
0.154, 1.679e-4  
0.153, 1.685e-4  
0.152, 1.694e-4  
0.151, 1.705e-4  
0.150, 1.712e-4  
0.149, 1.719e-4  
0.148, 1.727e-4  
0.147, 1.732e-4  
0.146, 1.739e-4  
0.145, 1.749e-4  
0.144, 1.754e-4  
0.143, 1.758e-4  
0.142, 1.769e-4  
0.141, 1.786e-4  
0.140, 1.797e-4  
0.139, 1.800e-4  
0.138, 1.803e-4  
0.137, 1.808e-4  
0.136, 1.815e-4  
0.135, 1.821e-4  
0.134, 1.827e-4  
0.133, 1.834e-4  
0.132, 1.842e-4  
0.131, 1.848e-4  
0.130, 1.854e-4  
0.129, 1.858e-4  
0.128, 1.866e-4  
0.127, 1.874e-4  
0.126, 1.883e-4  
0.125, 1.890e-4  
0.124, 1.897e-4  
0.123, 1.904e-4  
0.122, 1.912e-4  
0.121, 1.919e-4  
0.120, 1.929e-4  
0.119, 1.938e-4  
0.118, 1.948e-4  
0.117, 1.956e-4  
0.116, 1.965e-4  
0.115, 1.970e-4  
0.114, 1.976e-4

0.113, 1.983e-4  
0.112, 1.994e-4  
0.111, 2.000e-4  
0.110, 2.006e-4  
0.109, 2.008e-4  
0.108, 2.015e-4  
0.107, 2.020e-4  
0.106, 2.027e-4  
0.105, 2.035e-4  
0.104, 2.046e-4  
0.103, 2.057e-4  
0.102, 2.069e-4  
0.101, 2.077e-4  
0.100, 2.085e-4  
0.099, 2.093e-4  
0.098, 2.102e-4  
0.097, 2.109e-4  
0.096, 2.115e-4  
0.095, 2.122e-4  
0.094, 2.126e-4  
0.093, 2.131e-4  
0.092, 2.137e-4  
0.091, 2.149e-4  
0.090, 2.160e-4  
0.089, 2.164e-4  
0.088, 2.171e-4  
0.087, 2.180e-4  
0.086, 2.183e-4  
0.085, 2.192e-4  
0.084, 2.201e-4  
0.083, 2.209e-4  
0.082, 2.221e-4  
0.081, 2.228e-4  
0.080, 2.236e-4  
0.079, 2.250e-4  
0.078, 2.261e-4  
0.077, 2.266e-4  
0.076, 2.273e-4  
0.075, 2.280e-4  
0.074, 2.290e-4  
0.073, 2.305e-4  
0.072, 2.310e-4  
0.071, 2.310e-4  
0.070, 2.314e-4  
0.069, 2.322e-4  
0.068, 2.330e-4  
0.067, 2.342e-4  
0.066, 2.352e-4  
0.065, 2.367e-4  
0.064, 2.384e-4



0.063, 2.395e-4  
0.062, 2.404e-4  
0.061, 2.415e-4  
0.060, 2.419e-4  
0.059, 2.425e-4  
0.058, 2.430e-4  
0.057, 2.436e-4  
0.056, 2.444e-4  
0.055, 2.453e-4  
0.054, 2.461e-4  
0.053, 2.466e-4  
0.052, 2.471e-4  
0.051, 2.474e-4  
0.050, 2.482e-4  
0.049, 2.494e-4  
0.048, 2.508e-4  
0.047, 2.524e-4  
0.046, 2.538e-4  
0.045, 2.547e-4  
0.044, 2.556e-4  
0.043, 2.569e-4  
0.042, 2.580e-4  
0.041, 2.588e-4  
0.040, 2.597e-4  
0.039, 2.607e-4  
0.038, 2.618e-4  
0.037, 2.628e-4  
0.036, 2.637e-4  
0.035, 2.643e-4  
0.034, 2.651e-4  
0.033, 2.659e-4  
0.032, 2.669e-4  
0.031, 2.680e-4  
0.030, 2.692e-4  
0.029, 2.702e-4  
0.028, 2.712e-4  
0.027, 2.720e-4  
0.026, 2.727e-4  
0.025, 2.737e-4  
0.024, 2.743e-4  
0.023, 2.749e-4  
0.022, 2.753e-4  
0.021, 2.760e-4  
0.020, 2.768e-4  
0.019, 2.780e-4  
0.018, 2.790e-4  
0.017, 2.800e-4  
0.016, 2.813e-4  
0.015, 2.825e-4  
0.014, 2.836e-4

0.013, 2.849e-4  
0.012, 2.857e-4  
0.011, 2.854e-4  
0.010, 2.857e-4  
0.009, 2.865e-4  
0.008, 2.875e-4  
0.007, 2.891e-4  
0.006, 2.904e-4  
0.005, 2.915e-4  
0.004, 2.930e-4  
0.003, 2.937e-4  
0.002, 2.942e-4  
0.001, 2.946e-4  
0.000, 2.952e-4  
-0.001, 2.959e-4  
-0.002, 2.970e-4  
-0.003, 2.980e-4  
-0.004, 2.991e-4  
-0.005, 3.003e-4  
-0.006, 3.008e-4  
-0.007, 3.010e-4  
-0.008, 3.015e-4  
-0.009, 3.022e-4  
-0.010, 3.028e-4  
-0.011, 3.039e-4  
-0.012, 3.051e-4  
-0.013, 3.060e-4  
-0.014, 3.065e-4  
-0.015, 3.068e-4  
-0.016, 3.077e-4  
-0.017, 3.091e-4  
-0.018, 3.102e-4  
-0.019, 3.111e-4  
-0.020, 3.118e-4  
-0.021, 3.127e-4  
-0.022, 3.140e-4  
-0.023, 3.148e-4  
-0.024, 3.151e-4  
-0.025, 3.154e-4  
-0.026, 3.163e-4  
-0.027, 3.171e-4  
-0.028, 3.175e-4  
-0.029, 3.184e-4  
-0.030, 3.193e-4  
-0.031, 3.199e-4  
-0.032, 3.213e-4  
-0.033, 3.223e-4  
-0.034, 3.229e-4  
-0.035, 3.241e-4  
-0.036, 3.245e-4

-0.037, 3.251e-4  
-0.038, 3.261e-4  
-0.039, 3.263e-4  
-0.040, 3.260e-4  
-0.041, 3.263e-4  
-0.042, 3.269e-4  
-0.043, 3.278e-4  
-0.044, 3.291e-4  
-0.045, 3.298e-4  
-0.046, 3.309e-4  
-0.047, 3.318e-4  
-0.048, 3.322e-4  
-0.049, 3.321e-4  
-0.050, 3.325e-4  
-0.051, 3.332e-4  
-0.052, 3.340e-4  
-0.053, 3.351e-4  
-0.054, 3.362e-4  
-0.055, 3.373e-4  
-0.056, 3.377e-4  
-0.057, 3.383e-4  
-0.058, 3.384e-4  
-0.059, 3.387e-4  
-0.060, 3.394e-4  
-0.061, 3.402e-4  
-0.062, 3.411e-4  
-0.063, 3.420e-4  
-0.064, 3.426e-4  
-0.065, 3.427e-4  
-0.066, 3.426e-4  
-0.067, 3.426e-4  
-0.068, 3.431e-4  
-0.069, 3.437e-4  
-0.070, 3.445e-4  
-0.071, 3.446e-4  
-0.072, 3.441e-4  
-0.073, 3.448e-4  
-0.074, 3.459e-4  
-0.075, 3.465e-4  
-0.076, 3.475e-4  
-0.077, 3.487e-4  
-0.078, 3.486e-4  
-0.079, 3.490e-4  
-0.080, 3.502e-4  
-0.081, 3.515e-4  
-0.082, 3.522e-4  
-0.083, 3.520e-4  
-0.084, 3.517e-4  
-0.085, 3.517e-4  
-0.086, 3.528e-4

-0.087, 3.537e-4  
-0.088, 3.539e-4  
-0.089, 3.537e-4  
-0.090, 3.538e-4  
-0.091, 3.538e-4  
-0.092, 3.547e-4  
-0.093, 3.558e-4  
-0.094, 3.567e-4  
-0.095, 3.572e-4  
-0.096, 3.579e-4  
-0.097, 3.584e-4  
-0.098, 3.594e-4  
-0.099, 3.602e-4  
-0.100, 3.608e-4  
-0.101, 3.608e-4  
-0.102, 3.603e-4  
-0.103, 3.601e-4  
-0.104, 3.610e-4  
-0.105, 3.617e-4  
-0.106, 3.621e-4  
-0.107, 3.627e-4  
-0.108, 3.632e-4  
-0.109, 3.635e-4  
-0.110, 3.627e-4  
-0.111, 3.619e-4  
-0.112, 3.625e-4  
-0.113, 3.639e-4  
-0.114, 3.633e-4  
-0.115, 3.621e-4  
-0.116, 3.625e-4  
-0.117, 3.643e-4  
-0.118, 3.656e-4  
-0.119, 3.662e-4  
-0.120, 3.665e-4  
-0.121, 3.672e-4  
-0.122, 3.688e-4  
-0.123, 3.702e-4  
-0.124, 3.715e-4  
-0.125, 3.727e-4  
-0.126, 3.720e-4  
-0.127, 3.713e-4  
-0.128, 3.710e-4  
-0.129, 3.704e-4  
-0.130, 3.698e-4  
-0.131, 3.700e-4  
-0.132, 3.704e-4  
-0.133, 3.706e-4  
-0.134, 3.708e-4  
-0.135, 3.713e-4  
-0.136, 3.717e-4

-0.137, 3.724e-4  
-0.138, 3.728e-4  
-0.139, 3.730e-4  
-0.140, 3.728e-4  
-0.141, 3.727e-4  
-0.142, 3.730e-4  
-0.143, 3.731e-4  
-0.144, 3.727e-4  
-0.145, 3.725e-4  
-0.146, 3.733e-4  
-0.147, 3.750e-4  
-0.148, 3.765e-4  
-0.149, 3.769e-4  
-0.150, 3.773e-4  
-0.151, 3.779e-4  
-0.152, 3.788e-4  
-0.153, 3.788e-4  
-0.154, 3.781e-4  
-0.155, 3.767e-4  
-0.156, 3.765e-4  
-0.157, 3.779e-4  
-0.158, 3.787e-4  
-0.159, 3.782e-4  
-0.160, 3.779e-4  
-0.161, 3.781e-4  
-0.162, 3.782e-4  
-0.163, 3.779e-4  
-0.164, 3.781e-4  
-0.165, 3.778e-4  
-0.166, 3.777e-4  
-0.167, 3.782e-4  
-0.168, 3.787e-4  
-0.169, 3.786e-4  
-0.170, 3.783e-4  
-0.171, 3.783e-4  
-0.172, 3.780e-4  
-0.173, 3.778e-4  
-0.174, 3.777e-4  
-0.175, 3.779e-4  
-0.176, 3.780e-4  
-0.177, 3.788e-4  
-0.178, 3.793e-4  
-0.179, 3.800e-4  
-0.180, 3.812e-4  
-0.181, 3.819e-4  
-0.182, 3.816e-4  
-0.183, 3.809e-4  
-0.184, 3.807e-4  
-0.185, 3.812e-4  
-0.186, 3.820e-4

-0.187, 3.818e-4  
-0.188, 3.814e-4  
-0.189, 3.815e-4  
-0.190, 3.821e-4  
-0.191, 3.822e-4  
-0.192, 3.813e-4  
-0.193, 3.797e-4  
-0.194, 3.796e-4  
-0.195, 3.807e-4  
-0.196, 3.816e-4  
-0.197, 3.808e-4  
-0.198, 3.796e-4  
-0.199, 3.789e-4  
-0.200, 3.791e-4  
-0.201, 3.794e-4  
-0.202, 3.794e-4  
-0.203, 3.803e-4  
-0.204, 3.815e-4  
-0.205, 3.825e-4  
-0.206, 3.828e-4  
-0.207, 3.826e-4  
-0.208, 3.820e-4  
-0.209, 3.806e-4  
-0.210, 3.802e-4  
-0.211, 3.810e-4  
-0.212, 3.815e-4  
-0.213, 3.812e-4  
-0.214, 3.810e-4  
-0.215, 3.811e-4  
-0.216, 3.808e-4  
-0.217, 3.804e-4  
-0.218, 3.807e-4  
-0.219, 3.810e-4  
-0.220, 3.815e-4  
-0.221, 3.818e-4  
-0.222, 3.812e-4  
-0.223, 3.796e-4  
-0.224, 3.787e-4  
-0.225, 3.795e-4  
-0.226, 3.810e-4  
-0.227, 3.821e-4  
-0.228, 3.819e-4  
-0.229, 3.810e-4  
-0.230, 3.809e-4  
-0.231, 3.810e-4  
-0.232, 3.810e-4  
-0.233, 3.819e-4  
-0.234, 3.822e-4  
-0.235, 3.820e-4  
-0.236, 3.834e-4

-0.237, 3.844e-4  
-0.238, 3.835e-4  
-0.239, 3.819e-4  
-0.240, 3.806e-4  
-0.241, 3.795e-4  
-0.242, 3.794e-4  
-0.243, 3.800e-4  
-0.244, 3.805e-4  
-0.245, 3.810e-4  
-0.246, 3.806e-4  
-0.247, 3.805e-4  
-0.248, 3.805e-4  
-0.249, 3.794e-4  
-0.250, 3.787e-4  
-0.251, 3.790e-4  
-0.252, 3.795e-4  
-0.253, 3.798e-4  
-0.254, 3.805e-4  
-0.255, 3.802e-4  
-0.256, 3.800e-4  
-0.257, 3.803e-4  
-0.258, 3.804e-4  
-0.259, 3.804e-4  
-0.260, 3.807e-4  
-0.261, 3.804e-4  
-0.262, 3.799e-4  
-0.263, 3.799e-4  
-0.264, 3.800e-4  
-0.265, 3.807e-4  
-0.266, 3.817e-4  
-0.267, 3.821e-4  
-0.268, 3.825e-4  
-0.269, 3.819e-4  
-0.270, 3.805e-4  
-0.271, 3.799e-4  
-0.272, 3.811e-4  
-0.273, 3.819e-4  
-0.274, 3.816e-4  
-0.275, 3.816e-4  
-0.276, 3.819e-4  
-0.277, 3.835e-4  
-0.278, 3.848e-4  
-0.279, 3.853e-4  
-0.280, 3.863e-4  
-0.281, 3.880e-4  
-0.282, 3.895e-4  
-0.283, 3.913e-4  
-0.284, 3.924e-4  
-0.285, 3.916e-4  
-0.286, 3.921e-4

-0.287, 3.940e-4  
-0.288, 3.961e-4  
-0.289, 3.975e-4  
-0.290, 3.986e-4  
-0.291, 3.993e-4  
-0.292, 4.005e-4  
-0.293, 4.040e-4  
-0.294, 4.069e-4  
-0.295, 4.088e-4  
-0.296, 4.107e-4  
-0.297, 4.118e-4  
-0.298, 4.132e-4  
-0.299, 4.155e-4  
-0.300, 4.161e-4  
-0.301, 4.182e-4  
-0.302, 4.207e-4  
-0.303, 4.226e-4  
-0.304, 4.254e-4  
-0.305, 4.287e-4  
-0.306, 4.307e-4  
-0.307, 4.330e-4  
-0.308, 4.351e-4  
-0.309, 4.364e-4  
-0.310, 4.395e-4  
-0.311, 4.437e-4  
-0.312, 4.473e-4  
-0.313, 4.501e-4  
-0.314, 4.532e-4  
-0.315, 4.554e-4  
-0.316, 4.593e-4  
-0.317, 4.650e-4  
-0.318, 4.685e-4  
-0.319, 4.716e-4  
-0.320, 4.746e-4  
-0.321, 4.761e-4  
-0.322, 4.783e-4  
-0.323, 4.825e-4  
-0.324, 4.860e-4  
-0.325, 4.889e-4  
-0.326, 4.907e-4  
-0.327, 4.909e-4  
-0.328, 4.938e-4  
-0.329, 4.987e-4  
-0.330, 5.026e-4  
-0.331, 5.066e-4  
-0.332, 5.098e-4  
-0.333, 5.124e-4  
-0.334, 5.167e-4  
-0.335, 5.205e-4  
-0.336, 5.226e-4



-0.337, 5.252e-4  
-0.338, 5.294e-4  
-0.339, 5.321e-4  
-0.340, 5.351e-4  
-0.341, 5.385e-4  
-0.342, 5.402e-4  
-0.343, 5.432e-4  
-0.344, 5.476e-4  
-0.345, 5.498e-4  
-0.346, 5.529e-4  
-0.347, 5.572e-4  
-0.348, 5.598e-4  
-0.349, 5.635e-4  
-0.350, 5.677e-4  
-0.351, 5.683e-4  
-0.352, 5.693e-4  
-0.353, 5.737e-4  
-0.354, 5.759e-4  
-0.355, 5.771e-4  
-0.356, 5.810e-4  
-0.357, 5.834e-4  
-0.358, 5.862e-4  
-0.359, 5.910e-4  
-0.360, 5.948e-4  
-0.361, 6.006e-4  
-0.362, 5.972e-4  
-0.363, 5.918e-4  
-0.364, 5.948e-4  
-0.365, 5.996e-4  
-0.366, 6.031e-4  
-0.367, 6.079e-4  
-0.368, 6.113e-4  
-0.369, 6.114e-4  
-0.370, 6.110e-4  
-0.371, 6.145e-4  
-0.372, 6.196e-4  
-0.373, 6.205e-4  
-0.374, 6.172e-4  
-0.375, 6.179e-4  
-0.376, 6.217e-4  
-0.377, 6.233e-4  
-0.378, 6.225e-4  
-0.379, 6.242e-4  
-0.380, 6.261e-4  
-0.381, 6.282e-4  
-0.382, 6.305e-4  
-0.383, 6.356e-4  
-0.384, 6.382e-4  
-0.385, 6.383e-4  
-0.386, 6.385e-4

-0.387, 6.382e-4  
-0.388, 6.397e-4  
-0.389, 6.421e-4  
-0.390, 6.431e-4  
-0.391, 6.449e-4  
-0.392, 6.475e-4  
-0.393, 6.487e-4  
-0.394, 6.491e-4  
-0.395, 6.527e-4  
-0.396, 6.568e-4  
-0.397, 6.599e-4  
-0.398, 6.587e-4  
-0.399, 6.579e-4

Mar. 29, 2021 04:29:17

Linear Sweep Voltammetry

File: c:\users\shadji04\desktop\sofia cv\29032021\sweep scan under oxygen ph  
2.5\1500 rpm.txt

Data Source: Experiment

Instrument Model: CHI650E

Header:

Note: 1500 rpm

Init E (V) = 0.8

Final E (V) = -0.4

Scan Rate (V/s) = 0.025

Sample Interval (V) = 0.001

Quiet Time (sec) = 2

Sensitivity (A/V) = 0.01

Potential/V, Current/A

0.800, -8.619e-5  
0.799, -8.555e-5  
0.798, -8.496e-5  
0.797, -8.447e-5  
0.796, -8.383e-5  
0.795, -8.302e-5  
0.794, -8.271e-5  
0.793, -8.217e-5  
0.792, -8.191e-5  
0.791, -8.146e-5  
0.790, -8.108e-5  
0.789, -8.064e-5  
0.788, -8.008e-5  
0.787, -7.976e-5  
0.786, -7.922e-5  
0.785, -7.860e-5  
0.784, -7.800e-5  
0.783, -7.770e-5  
0.782, -7.740e-5  
0.781, -7.696e-5  
0.780, -7.642e-5  
0.779, -7.583e-5

0.778, -7.532e-5  
0.777, -7.492e-5  
0.776, -7.468e-5  
0.775, -7.419e-5  
0.774, -7.373e-5  
0.773, -7.337e-5  
0.772, -7.294e-5  
0.771, -7.236e-5  
0.770, -7.192e-5  
0.769, -7.143e-5  
0.768, -7.096e-5  
0.767, -7.066e-5  
0.766, -7.034e-5  
0.765, -6.978e-5  
0.764, -6.941e-5  
0.763, -6.912e-5  
0.762, -6.865e-5  
0.761, -6.804e-5  
0.760, -6.783e-5  
0.759, -6.739e-5  
0.758, -6.699e-5  
0.757, -6.649e-5  
0.756, -6.609e-5  
0.755, -6.579e-5  
0.754, -6.543e-5  
0.753, -6.501e-5  
0.752, -6.461e-5  
0.751, -6.425e-5  
0.750, -6.392e-5  
0.749, -6.343e-5  
0.748, -6.306e-5  
0.747, -6.263e-5  
0.746, -6.219e-5  
0.745, -6.164e-5  
0.744, -6.135e-5  
0.743, -6.104e-5  
0.742, -6.080e-5  
0.741, -6.037e-5  
0.740, -5.991e-5  
0.739, -5.933e-5  
0.738, -5.906e-5  
0.737, -5.874e-5  
0.736, -5.821e-5  
0.735, -5.792e-5  
0.734, -5.745e-5  
0.733, -5.715e-5  
0.732, -5.676e-5  
0.731, -5.642e-5  
0.730, -5.592e-5  
0.729, -5.562e-5

0.728, -5.534e-5  
0.727, -5.505e-5  
0.726, -5.474e-5  
0.725, -5.426e-5  
0.724, -5.392e-5  
0.723, -5.369e-5  
0.722, -5.328e-5  
0.721, -5.286e-5  
0.720, -5.252e-5  
0.719, -5.205e-5  
0.718, -5.170e-5  
0.717, -5.138e-5  
0.716, -5.081e-5  
0.715, -5.026e-5  
0.714, -5.017e-5  
0.713, -4.984e-5  
0.712, -4.946e-5  
0.711, -4.930e-5  
0.710, -4.881e-5  
0.709, -4.861e-5  
0.708, -4.813e-5  
0.707, -4.769e-5  
0.706, -4.751e-5  
0.705, -4.742e-5  
0.704, -4.710e-5  
0.703, -4.667e-5  
0.702, -4.631e-5  
0.701, -4.612e-5  
0.700, -4.581e-5  
0.699, -4.555e-5  
0.698, -4.524e-5  
0.697, -4.489e-5  
0.696, -4.464e-5  
0.695, -4.421e-5  
0.694, -4.407e-5  
0.693, -4.385e-5  
0.692, -4.357e-5  
0.691, -4.327e-5  
0.690, -4.283e-5  
0.689, -4.245e-5  
0.688, -4.224e-5  
0.687, -4.193e-5  
0.686, -4.184e-5  
0.685, -4.159e-5  
0.684, -4.137e-5  
0.683, -4.113e-5  
0.682, -4.087e-5  
0.681, -4.061e-5  
0.680, -4.028e-5  
0.679, -4.014e-5

0.678, -3.990e-5  
0.677, -3.965e-5  
0.676, -3.944e-5  
0.675, -3.918e-5  
0.674, -3.888e-5  
0.673, -3.854e-5  
0.672, -3.818e-5  
0.671, -3.799e-5  
0.670, -3.780e-5  
0.669, -3.748e-5  
0.668, -3.736e-5  
0.667, -3.733e-5  
0.666, -3.707e-5  
0.665, -3.664e-5  
0.664, -3.643e-5  
0.663, -3.634e-5  
0.662, -3.625e-5  
0.661, -3.617e-5  
0.660, -3.587e-5  
0.659, -3.564e-5  
0.658, -3.551e-5  
0.657, -3.524e-5  
0.656, -3.509e-5  
0.655, -3.494e-5  
0.654, -3.469e-5  
0.653, -3.454e-5  
0.652, -3.426e-5  
0.651, -3.406e-5  
0.650, -3.369e-5  
0.649, -3.365e-5  
0.648, -3.357e-5  
0.647, -3.337e-5  
0.646, -3.323e-5  
0.645, -3.299e-5  
0.644, -3.293e-5  
0.643, -3.280e-5  
0.642, -3.262e-5  
0.641, -3.242e-5  
0.640, -3.232e-5  
0.639, -3.214e-5  
0.638, -3.202e-5  
0.637, -3.189e-5  
0.636, -3.160e-5  
0.635, -3.139e-5  
0.634, -3.127e-5  
0.633, -3.104e-5  
0.632, -3.095e-5  
0.631, -3.093e-5  
0.630, -3.068e-5  
0.629, -3.034e-5

0.628, -3.031e-5  
0.627, -3.020e-5  
0.626, -3.015e-5  
0.625, -3.001e-5  
0.624, -2.985e-5  
0.623, -2.967e-5  
0.622, -2.937e-5  
0.621, -2.940e-5  
0.620, -2.927e-5  
0.619, -2.916e-5  
0.618, -2.909e-5  
0.617, -2.886e-5  
0.616, -2.879e-5  
0.615, -2.850e-5  
0.614, -2.824e-5  
0.613, -2.823e-5  
0.612, -2.814e-5  
0.611, -2.814e-5  
0.610, -2.807e-5  
0.609, -2.789e-5  
0.608, -2.768e-5  
0.607, -2.760e-5  
0.606, -2.750e-5  
0.605, -2.736e-5  
0.604, -2.730e-5  
0.603, -2.715e-5  
0.602, -2.703e-5  
0.601, -2.689e-5  
0.600, -2.680e-5  
0.599, -2.663e-5  
0.598, -2.648e-5  
0.597, -2.632e-5  
0.596, -2.595e-5  
0.595, -2.591e-5  
0.594, -2.588e-5  
0.593, -2.544e-5  
0.592, -2.559e-5  
0.591, -2.552e-5  
0.590, -2.550e-5  
0.589, -2.534e-5  
0.588, -2.518e-5  
0.587, -2.502e-5  
0.586, -2.488e-5  
0.585, -2.481e-5  
0.584, -2.477e-5  
0.583, -2.452e-5  
0.582, -2.432e-5  
0.581, -2.413e-5  
0.580, -2.406e-5  
0.579, -2.406e-5

0.578, -2.382e-5  
0.577, -2.374e-5  
0.576, -2.356e-5  
0.575, -2.352e-5  
0.574, -2.336e-5  
0.573, -2.316e-5  
0.572, -2.316e-5  
0.571, -2.297e-5  
0.570, -2.273e-5  
0.569, -2.267e-5  
0.568, -2.253e-5  
0.567, -2.225e-5  
0.566, -2.211e-5  
0.565, -2.197e-5  
0.564, -2.199e-5  
0.563, -2.165e-5  
0.562, -2.151e-5  
0.561, -2.115e-5  
0.560, -2.123e-5  
0.559, -2.113e-5  
0.558, -2.100e-5  
0.557, -2.085e-5  
0.556, -2.069e-5  
0.555, -2.047e-5  
0.554, -2.032e-5  
0.553, -2.020e-5  
0.552, -2.001e-5  
0.551, -1.977e-5  
0.550, -1.969e-5  
0.549, -1.942e-5  
0.548, -1.914e-5  
0.547, -1.906e-5  
0.546, -1.894e-5  
0.545, -1.880e-5  
0.544, -1.862e-5  
0.543, -1.844e-5  
0.542, -1.808e-5  
0.541, -1.803e-5  
0.540, -1.786e-5  
0.539, -1.760e-5  
0.538, -1.732e-5  
0.537, -1.711e-5  
0.536, -1.695e-5  
0.535, -1.680e-5  
0.534, -1.650e-5  
0.533, -1.631e-5  
0.532, -1.606e-5  
0.531, -1.589e-5  
0.530, -1.560e-5  
0.529, -1.542e-5

0.528, -1.513e-5  
0.527, -1.486e-5  
0.526, -1.470e-5  
0.525, -1.426e-5  
0.524, -1.400e-5  
0.523, -1.381e-5  
0.522, -1.345e-5  
0.521, -1.322e-5  
0.520, -1.301e-5  
0.519, -1.286e-5  
0.518, -1.236e-5  
0.517, -1.211e-5  
0.516, -1.202e-5  
0.515, -1.170e-5  
0.514, -1.138e-5  
0.513, -1.108e-5  
0.512, -1.074e-5  
0.511, -1.043e-5  
0.510, -1.012e-5  
0.509, -9.771e-6  
0.508, -9.447e-6  
0.507, -9.024e-6  
0.506, -8.474e-6  
0.505, -8.297e-6  
0.504, -8.042e-6  
0.503, -7.767e-6  
0.502, -7.384e-6  
0.501, -6.932e-6  
0.500, -6.559e-6  
0.499, -6.087e-6  
0.498, -5.498e-6  
0.497, -5.232e-6  
0.496, -4.957e-6  
0.495, -4.545e-6  
0.494, -4.142e-6  
0.493, -3.690e-6  
0.492, -3.258e-6  
0.491, -2.855e-6  
0.490, -2.491e-6  
0.489, -2.039e-6  
0.488, -1.509e-6  
0.487, -1.087e-6  
0.486, -5.462e-7  
0.485, -1.434e-7  
0.484, 3.183e-7  
0.483, 7.997e-7  
0.482, 1.271e-6  
0.481, 1.979e-6  
0.480, 2.391e-6  
0.479, 2.941e-6



0.478, 3.315e-6  
0.477, 3.825e-6  
0.476, 4.651e-6  
0.475, 5.044e-6  
0.474, 5.564e-6  
0.473, 6.075e-6  
0.472, 6.773e-6  
0.471, 7.146e-6  
0.470, 7.971e-6  
0.469, 8.698e-6  
0.468, 9.042e-6  
0.467, 9.553e-6  
0.466, 1.009e-5  
0.465, 1.097e-5  
0.464, 1.165e-5  
0.463, 1.206e-5  
0.462, 1.248e-5  
0.461, 1.296e-5  
0.460, 1.362e-5  
0.459, 1.427e-5  
0.458, 1.512e-5  
0.457, 1.552e-5  
0.456, 1.596e-5  
0.455, 1.658e-5  
0.454, 1.725e-5  
0.453, 1.781e-5  
0.452, 1.848e-5  
0.451, 1.902e-5  
0.450, 1.975e-5  
0.449, 2.038e-5  
0.448, 2.104e-5  
0.447, 2.172e-5  
0.446, 2.250e-5  
0.445, 2.298e-5  
0.444, 2.362e-5  
0.443, 2.420e-5  
0.442, 2.485e-5  
0.441, 2.543e-5  
0.440, 2.602e-5  
0.439, 2.667e-5  
0.438, 2.736e-5  
0.437, 2.818e-5  
0.436, 2.897e-5  
0.435, 2.943e-5  
0.434, 2.982e-5  
0.433, 3.037e-5  
0.432, 3.099e-5  
0.431, 3.164e-5  
0.430, 3.214e-5  
0.429, 3.265e-5

0.428, 3.329e-5  
0.427, 3.411e-5  
0.426, 3.465e-5  
0.425, 3.512e-5  
0.424, 3.561e-5  
0.423, 3.616e-5  
0.422, 3.661e-5  
0.421, 3.749e-5  
0.420, 3.799e-5  
0.419, 3.860e-5  
0.418, 3.910e-5  
0.417, 3.944e-5  
0.416, 3.998e-5  
0.415, 4.066e-5  
0.414, 4.122e-5  
0.413, 4.170e-5  
0.412, 4.228e-5  
0.411, 4.290e-5  
0.410, 4.347e-5  
0.409, 4.410e-5  
0.408, 4.465e-5  
0.407, 4.492e-5  
0.406, 4.553e-5  
0.405, 4.595e-5  
0.404, 4.667e-5  
0.403, 4.717e-5  
0.402, 4.780e-5  
0.401, 4.825e-5  
0.400, 4.864e-5  
0.399, 4.928e-5  
0.398, 4.997e-5  
0.397, 5.040e-5  
0.396, 5.093e-5  
0.395, 5.139e-5  
0.394, 5.195e-5  
0.393, 5.228e-5  
0.392, 5.283e-5  
0.391, 5.347e-5  
0.390, 5.386e-5  
0.389, 5.433e-5  
0.388, 5.466e-5  
0.387, 5.513e-5  
0.386, 5.566e-5  
0.385, 5.624e-5  
0.384, 5.674e-5  
0.383, 5.736e-5  
0.382, 5.773e-5  
0.381, 5.844e-5  
0.380, 5.887e-5  
0.379, 5.933e-5

0.378, 5.992e-5  
0.377, 6.050e-5  
0.376, 6.085e-5  
0.375, 6.143e-5  
0.374, 6.205e-5  
0.373, 6.258e-5  
0.372, 6.317e-5  
0.371, 6.341e-5  
0.370, 6.396e-5  
0.369, 6.449e-5  
0.368, 6.498e-5  
0.367, 6.543e-5  
0.366, 6.593e-5  
0.365, 6.657e-5  
0.364, 6.710e-5  
0.363, 6.784e-5  
0.362, 6.821e-5  
0.361, 6.861e-5  
0.360, 6.941e-5  
0.359, 7.009e-5  
0.358, 7.041e-5  
0.357, 7.091e-5  
0.356, 7.133e-5  
0.355, 7.183e-5  
0.354, 7.252e-5  
0.353, 7.299e-5  
0.352, 7.361e-5  
0.351, 7.423e-5  
0.350, 7.476e-5  
0.349, 7.525e-5  
0.348, 7.575e-5  
0.347, 7.638e-5  
0.346, 7.684e-5  
0.345, 7.792e-5  
0.344, 7.851e-5  
0.343, 7.890e-5  
0.342, 7.933e-5  
0.341, 7.977e-5  
0.340, 8.057e-5  
0.339, 8.123e-5  
0.338, 8.161e-5  
0.337, 8.193e-5  
0.336, 8.255e-5  
0.335, 8.339e-5  
0.334, 8.384e-5  
0.333, 8.448e-5  
0.332, 8.493e-5  
0.331, 8.554e-5  
0.330, 8.614e-5  
0.329, 8.662e-5

0.328, 8.733e-5  
0.327, 8.798e-5  
0.326, 8.871e-5  
0.325, 8.916e-5  
0.324, 8.982e-5  
0.323, 9.034e-5  
0.322, 9.085e-5  
0.321, 9.124e-5  
0.320, 9.172e-5  
0.319, 9.246e-5  
0.318, 9.294e-5  
0.317, 9.363e-5  
0.316, 9.414e-5  
0.315, 9.452e-5  
0.314, 9.497e-5  
0.313, 9.551e-5  
0.312, 9.622e-5  
0.311, 9.672e-5  
0.310, 9.742e-5  
0.309, 9.796e-5  
0.308, 9.843e-5  
0.307, 9.908e-5  
0.306, 9.950e-5  
0.305, 1.000e-4  
0.304, 1.004e-4  
0.303, 1.011e-4  
0.302, 1.015e-4  
0.301, 1.019e-4  
0.300, 1.025e-4  
0.299, 1.032e-4  
0.298, 1.036e-4  
0.297, 1.041e-4  
0.296, 1.049e-4  
0.295, 1.055e-4  
0.294, 1.057e-4  
0.293, 1.060e-4  
0.292, 1.065e-4  
0.291, 1.069e-4  
0.290, 1.077e-4  
0.289, 1.085e-4  
0.288, 1.091e-4  
0.287, 1.095e-4  
0.286, 1.099e-4  
0.285, 1.104e-4  
0.284, 1.111e-4  
0.283, 1.115e-4  
0.282, 1.118e-4  
0.281, 1.123e-4  
0.280, 1.129e-4  
0.279, 1.133e-4

0.278, 1.139e-4  
0.277, 1.144e-4  
0.276, 1.147e-4  
0.275, 1.151e-4  
0.274, 1.157e-4  
0.273, 1.161e-4  
0.272, 1.166e-4  
0.271, 1.173e-4  
0.270, 1.176e-4  
0.269, 1.179e-4  
0.268, 1.186e-4  
0.267, 1.190e-4  
0.266, 1.194e-4  
0.265, 1.199e-4  
0.264, 1.205e-4  
0.263, 1.212e-4  
0.262, 1.215e-4  
0.261, 1.219e-4  
0.260, 1.224e-4  
0.259, 1.229e-4  
0.258, 1.237e-4  
0.257, 1.240e-4  
0.256, 1.244e-4  
0.255, 1.247e-4  
0.254, 1.250e-4  
0.253, 1.256e-4  
0.252, 1.262e-4  
0.251, 1.266e-4  
0.250, 1.275e-4  
0.249, 1.279e-4  
0.248, 1.282e-4  
0.247, 1.288e-4  
0.246, 1.293e-4  
0.245, 1.299e-4  
0.244, 1.303e-4  
0.243, 1.308e-4  
0.242, 1.312e-4  
0.241, 1.316e-4  
0.240, 1.322e-4  
0.239, 1.325e-4  
0.238, 1.330e-4  
0.237, 1.336e-4  
0.236, 1.341e-4  
0.235, 1.348e-4  
0.234, 1.355e-4  
0.233, 1.360e-4  
0.232, 1.364e-4  
0.231, 1.368e-4  
0.230, 1.371e-4  
0.229, 1.374e-4

0.228, 1.381e-4  
0.227, 1.387e-4  
0.226, 1.395e-4  
0.225, 1.400e-4  
0.224, 1.405e-4  
0.223, 1.410e-4  
0.222, 1.413e-4  
0.221, 1.419e-4  
0.220, 1.424e-4  
0.219, 1.430e-4  
0.218, 1.434e-4  
0.217, 1.439e-4  
0.216, 1.444e-4  
0.215, 1.449e-4  
0.214, 1.454e-4  
0.213, 1.461e-4  
0.212, 1.468e-4  
0.211, 1.472e-4  
0.210, 1.475e-4  
0.209, 1.482e-4  
0.208, 1.488e-4  
0.207, 1.493e-4  
0.206, 1.498e-4  
0.205, 1.506e-4  
0.204, 1.515e-4  
0.203, 1.521e-4  
0.202, 1.525e-4  
0.201, 1.531e-4  
0.200, 1.537e-4  
0.199, 1.542e-4  
0.198, 1.549e-4  
0.197, 1.554e-4  
0.196, 1.560e-4  
0.195, 1.565e-4  
0.194, 1.573e-4  
0.193, 1.578e-4  
0.192, 1.580e-4  
0.191, 1.586e-4  
0.190, 1.592e-4  
0.189, 1.597e-4  
0.188, 1.604e-4  
0.187, 1.611e-4  
0.186, 1.618e-4  
0.185, 1.624e-4  
0.184, 1.631e-4  
0.183, 1.636e-4  
0.182, 1.642e-4  
0.181, 1.648e-4  
0.180, 1.656e-4  
0.179, 1.662e-4

0.178, 1.669e-4  
0.177, 1.677e-4  
0.176, 1.682e-4  
0.175, 1.689e-4  
0.174, 1.699e-4  
0.173, 1.706e-4  
0.172, 1.711e-4  
0.171, 1.714e-4  
0.170, 1.721e-4  
0.169, 1.730e-4  
0.168, 1.738e-4  
0.167, 1.743e-4  
0.166, 1.751e-4  
0.165, 1.760e-4  
0.164, 1.768e-4  
0.163, 1.775e-4  
0.162, 1.780e-4  
0.161, 1.789e-4  
0.160, 1.797e-4  
0.159, 1.802e-4  
0.158, 1.805e-4  
0.157, 1.813e-4  
0.156, 1.821e-4  
0.155, 1.831e-4  
0.154, 1.840e-4  
0.153, 1.850e-4  
0.152, 1.857e-4  
0.151, 1.865e-4  
0.150, 1.872e-4  
0.149, 1.876e-4  
0.148, 1.883e-4  
0.147, 1.892e-4  
0.146, 1.901e-4  
0.145, 1.910e-4  
0.144, 1.916e-4  
0.143, 1.922e-4  
0.142, 1.930e-4  
0.141, 1.937e-4  
0.140, 1.947e-4  
0.139, 1.957e-4  
0.138, 1.963e-4  
0.137, 1.974e-4  
0.136, 1.983e-4  
0.135, 1.993e-4  
0.134, 2.002e-4  
0.133, 2.011e-4  
0.132, 2.022e-4  
0.131, 2.027e-4  
0.130, 2.032e-4  
0.129, 2.039e-4

0.128, 2.048e-4  
0.127, 2.058e-4  
0.126, 2.069e-4  
0.125, 2.077e-4  
0.124, 2.085e-4  
0.123, 2.095e-4  
0.122, 2.106e-4  
0.121, 2.119e-4  
0.120, 2.130e-4  
0.119, 2.138e-4  
0.118, 2.145e-4  
0.117, 2.155e-4  
0.116, 2.165e-4  
0.115, 2.173e-4  
0.114, 2.184e-4  
0.113, 2.194e-4  
0.112, 2.205e-4  
0.111, 2.218e-4  
0.110, 2.227e-4  
0.109, 2.234e-4  
0.108, 2.243e-4  
0.107, 2.252e-4  
0.106, 2.264e-4  
0.105, 2.278e-4  
0.104, 2.287e-4  
0.103, 2.296e-4  
0.102, 2.307e-4  
0.101, 2.317e-4  
0.100, 2.330e-4  
0.099, 2.341e-4  
0.098, 2.352e-4  
0.097, 2.364e-4  
0.096, 2.376e-4  
0.095, 2.390e-4  
0.094, 2.403e-4  
0.093, 2.417e-4  
0.092, 2.430e-4  
0.091, 2.441e-4  
0.090, 2.455e-4  
0.089, 2.469e-4  
0.088, 2.483e-4  
0.087, 2.494e-4  
0.086, 2.503e-4  
0.085, 2.512e-4  
0.084, 2.525e-4  
0.083, 2.540e-4  
0.082, 2.552e-4  
0.081, 2.564e-4  
0.080, 2.577e-4  
0.079, 2.589e-4



0.078, 2.603e-4  
0.077, 2.618e-4  
0.076, 2.633e-4  
0.075, 2.643e-4  
0.074, 2.657e-4  
0.073, 2.672e-4  
0.072, 2.684e-4  
0.071, 2.698e-4  
0.070, 2.708e-4  
0.069, 2.722e-4  
0.068, 2.737e-4  
0.067, 2.749e-4  
0.066, 2.763e-4  
0.065, 2.776e-4  
0.064, 2.787e-4  
0.063, 2.801e-4  
0.062, 2.815e-4  
0.061, 2.830e-4  
0.060, 2.847e-4  
0.059, 2.861e-4  
0.058, 2.871e-4  
0.057, 2.885e-4  
0.056, 2.900e-4  
0.055, 2.916e-4  
0.054, 2.931e-4  
0.053, 2.944e-4  
0.052, 2.954e-4  
0.051, 2.966e-4  
0.050, 2.979e-4  
0.049, 2.991e-4  
0.048, 3.002e-4  
0.047, 3.016e-4  
0.046, 3.028e-4  
0.045, 3.042e-4  
0.044, 3.059e-4  
0.043, 3.068e-4  
0.042, 3.079e-4  
0.041, 3.094e-4  
0.040, 3.105e-4  
0.039, 3.120e-4  
0.038, 3.134e-4  
0.037, 3.145e-4  
0.036, 3.156e-4  
0.035, 3.171e-4  
0.034, 3.181e-4  
0.033, 3.191e-4  
0.032, 3.207e-4  
0.031, 3.219e-4  
0.030, 3.229e-4  
0.029, 3.242e-4

0.028, 3.255e-4  
0.027, 3.266e-4  
0.026, 3.277e-4  
0.025, 3.292e-4  
0.024, 3.306e-4  
0.023, 3.318e-4  
0.022, 3.330e-4  
0.021, 3.342e-4  
0.020, 3.352e-4  
0.019, 3.361e-4  
0.018, 3.375e-4  
0.017, 3.381e-4  
0.016, 3.389e-4  
0.015, 3.401e-4  
0.014, 3.414e-4  
0.013, 3.424e-4  
0.012, 3.436e-4  
0.011, 3.448e-4  
0.010, 3.460e-4  
0.009, 3.466e-4  
0.008, 3.475e-4  
0.007, 3.487e-4  
0.006, 3.496e-4  
0.005, 3.509e-4  
0.004, 3.521e-4  
0.003, 3.533e-4  
0.002, 3.542e-4  
0.001, 3.551e-4  
0.000, 3.561e-4  
-0.001, 3.574e-4  
-0.002, 3.584e-4  
-0.003, 3.593e-4  
-0.004, 3.605e-4  
-0.005, 3.612e-4  
-0.006, 3.617e-4  
-0.007, 3.625e-4  
-0.008, 3.637e-4  
-0.009, 3.649e-4  
-0.010, 3.664e-4  
-0.011, 3.676e-4  
-0.012, 3.682e-4  
-0.013, 3.691e-4  
-0.014, 3.701e-4  
-0.015, 3.711e-4  
-0.016, 3.722e-4  
-0.017, 3.731e-4  
-0.018, 3.739e-4  
-0.019, 3.751e-4  
-0.020, 3.760e-4  
-0.021, 3.766e-4

-0.022, 3.775e-4  
-0.023, 3.777e-4  
-0.024, 3.782e-4  
-0.025, 3.790e-4  
-0.026, 3.798e-4  
-0.027, 3.807e-4  
-0.028, 3.814e-4  
-0.029, 3.821e-4  
-0.030, 3.823e-4  
-0.031, 3.830e-4  
-0.032, 3.841e-4  
-0.033, 3.853e-4  
-0.034, 3.865e-4  
-0.035, 3.874e-4  
-0.036, 3.882e-4  
-0.037, 3.889e-4  
-0.038, 3.891e-4  
-0.039, 3.890e-4  
-0.040, 3.898e-4  
-0.041, 3.910e-4  
-0.042, 3.921e-4  
-0.043, 3.926e-4  
-0.044, 3.927e-4  
-0.045, 3.934e-4  
-0.046, 3.938e-4  
-0.047, 3.948e-4  
-0.048, 3.961e-4  
-0.049, 3.973e-4  
-0.050, 3.983e-4  
-0.051, 3.989e-4  
-0.052, 3.997e-4  
-0.053, 4.001e-4  
-0.054, 4.008e-4  
-0.055, 4.019e-4  
-0.056, 4.027e-4  
-0.057, 4.033e-4  
-0.058, 4.035e-4  
-0.059, 4.042e-4  
-0.060, 4.049e-4  
-0.061, 4.056e-4  
-0.062, 4.058e-4  
-0.063, 4.055e-4  
-0.064, 4.060e-4  
-0.065, 4.068e-4  
-0.066, 4.078e-4  
-0.067, 4.087e-4  
-0.068, 4.097e-4  
-0.069, 4.100e-4  
-0.070, 4.102e-4  
-0.071, 4.109e-4

-0.072, 4.120e-4  
-0.073, 4.129e-4  
-0.074, 4.136e-4  
-0.075, 4.138e-4  
-0.076, 4.138e-4  
-0.077, 4.145e-4  
-0.078, 4.153e-4  
-0.079, 4.159e-4  
-0.080, 4.165e-4  
-0.081, 4.174e-4  
-0.082, 4.180e-4  
-0.083, 4.182e-4  
-0.084, 4.185e-4  
-0.085, 4.191e-4  
-0.086, 4.198e-4  
-0.087, 4.202e-4  
-0.088, 4.206e-4  
-0.089, 4.211e-4  
-0.090, 4.215e-4  
-0.091, 4.218e-4  
-0.092, 4.222e-4  
-0.093, 4.229e-4  
-0.094, 4.239e-4  
-0.095, 4.245e-4  
-0.096, 4.249e-4  
-0.097, 4.241e-4  
-0.098, 4.239e-4  
-0.099, 4.246e-4  
-0.100, 4.251e-4  
-0.101, 4.254e-4  
-0.102, 4.260e-4  
-0.103, 4.265e-4  
-0.104, 4.272e-4  
-0.105, 4.278e-4  
-0.106, 4.283e-4  
-0.107, 4.289e-4  
-0.108, 4.295e-4  
-0.109, 4.297e-4  
-0.110, 4.299e-4  
-0.111, 4.304e-4  
-0.112, 4.303e-4  
-0.113, 4.301e-4  
-0.114, 4.307e-4  
-0.115, 4.315e-4  
-0.116, 4.321e-4  
-0.117, 4.322e-4  
-0.118, 4.327e-4  
-0.119, 4.333e-4  
-0.120, 4.333e-4  
-0.121, 4.332e-4

-0.122, 4.342e-4  
-0.123, 4.350e-4  
-0.124, 4.355e-4  
-0.125, 4.354e-4  
-0.126, 4.352e-4  
-0.127, 4.355e-4  
-0.128, 4.348e-4  
-0.129, 4.353e-4  
-0.130, 4.363e-4  
-0.131, 4.377e-4  
-0.132, 4.383e-4  
-0.133, 4.378e-4  
-0.134, 4.384e-4  
-0.135, 4.387e-4  
-0.136, 4.383e-4  
-0.137, 4.384e-4  
-0.138, 4.387e-4  
-0.139, 4.390e-4  
-0.140, 4.397e-4  
-0.141, 4.397e-4  
-0.142, 4.393e-4  
-0.143, 4.395e-4  
-0.144, 4.393e-4  
-0.145, 4.399e-4  
-0.146, 4.405e-4  
-0.147, 4.415e-4  
-0.148, 4.417e-4  
-0.149, 4.419e-4  
-0.150, 4.419e-4  
-0.151, 4.420e-4  
-0.152, 4.419e-4  
-0.153, 4.418e-4  
-0.154, 4.423e-4  
-0.155, 4.428e-4  
-0.156, 4.433e-4  
-0.157, 4.436e-4  
-0.158, 4.436e-4  
-0.159, 4.442e-4  
-0.160, 4.447e-4  
-0.161, 4.442e-4  
-0.162, 4.440e-4  
-0.163, 4.446e-4  
-0.164, 4.453e-4  
-0.165, 4.455e-4  
-0.166, 4.459e-4  
-0.167, 4.461e-4  
-0.168, 4.456e-4  
-0.169, 4.447e-4  
-0.170, 4.447e-4  
-0.171, 4.454e-4

-0.172, 4.459e-4  
-0.173, 4.462e-4  
-0.174, 4.465e-4  
-0.175, 4.475e-4  
-0.176, 4.474e-4  
-0.177, 4.468e-4  
-0.178, 4.458e-4  
-0.179, 4.452e-4  
-0.180, 4.452e-4  
-0.181, 4.460e-4  
-0.182, 4.474e-4  
-0.183, 4.479e-4  
-0.184, 4.479e-4  
-0.185, 4.478e-4  
-0.186, 4.480e-4  
-0.187, 4.481e-4  
-0.188, 4.480e-4  
-0.189, 4.477e-4  
-0.190, 4.469e-4  
-0.191, 4.458e-4  
-0.192, 4.461e-4  
-0.193, 4.467e-4  
-0.194, 4.474e-4  
-0.195, 4.480e-4  
-0.196, 4.483e-4  
-0.197, 4.483e-4  
-0.198, 4.469e-4  
-0.199, 4.468e-4  
-0.200, 4.471e-4  
-0.201, 4.480e-4  
-0.202, 4.488e-4  
-0.203, 4.488e-4  
-0.204, 4.492e-4  
-0.205, 4.491e-4  
-0.206, 4.492e-4  
-0.207, 4.489e-4  
-0.208, 4.485e-4  
-0.209, 4.486e-4  
-0.210, 4.488e-4  
-0.211, 4.493e-4  
-0.212, 4.493e-4  
-0.213, 4.487e-4  
-0.214, 4.481e-4  
-0.215, 4.480e-4  
-0.216, 4.482e-4  
-0.217, 4.477e-4  
-0.218, 4.469e-4  
-0.219, 4.482e-4  
-0.220, 4.484e-4  
-0.221, 4.482e-4

-0.222, 4.471e-4  
-0.223, 4.455e-4  
-0.224, 4.456e-4  
-0.225, 4.460e-4  
-0.226, 4.466e-4  
-0.227, 4.476e-4  
-0.228, 4.484e-4  
-0.229, 4.483e-4  
-0.230, 4.486e-4  
-0.231, 4.488e-4  
-0.232, 4.486e-4  
-0.233, 4.486e-4  
-0.234, 4.483e-4  
-0.235, 4.476e-4  
-0.236, 4.474e-4  
-0.237, 4.475e-4  
-0.238, 4.476e-4  
-0.239, 4.485e-4  
-0.240, 4.483e-4  
-0.241, 4.477e-4  
-0.242, 4.457e-4  
-0.243, 4.455e-4  
-0.244, 4.462e-4  
-0.245, 4.462e-4  
-0.246, 4.458e-4  
-0.247, 4.456e-4  
-0.248, 4.460e-4  
-0.249, 4.466e-4  
-0.250, 4.464e-4  
-0.251, 4.464e-4  
-0.252, 4.469e-4  
-0.253, 4.471e-4  
-0.254, 4.473e-4  
-0.255, 4.470e-4  
-0.256, 4.456e-4  
-0.257, 4.453e-4  
-0.258, 4.464e-4  
-0.259, 4.470e-4  
-0.260, 4.469e-4  
-0.261, 4.465e-4  
-0.262, 4.462e-4  
-0.263, 4.466e-4  
-0.264, 4.476e-4  
-0.265, 4.489e-4  
-0.266, 4.484e-4  
-0.267, 4.469e-4  
-0.268, 4.465e-4  
-0.269, 4.476e-4  
-0.270, 4.487e-4  
-0.271, 4.496e-4

-0.272, 4.499e-4  
-0.273, 4.498e-4  
-0.274, 4.511e-4  
-0.275, 4.520e-4  
-0.276, 4.519e-4  
-0.277, 4.512e-4  
-0.278, 4.517e-4  
-0.279, 4.525e-4  
-0.280, 4.536e-4  
-0.281, 4.551e-4  
-0.282, 4.556e-4  
-0.283, 4.558e-4  
-0.284, 4.567e-4  
-0.285, 4.576e-4  
-0.286, 4.589e-4  
-0.287, 4.606e-4  
-0.288, 4.624e-4  
-0.289, 4.619e-4  
-0.290, 4.617e-4  
-0.291, 4.637e-4  
-0.292, 4.667e-4  
-0.293, 4.690e-4  
-0.294, 4.707e-4  
-0.295, 4.725e-4  
-0.296, 4.726e-4  
-0.297, 4.751e-4  
-0.298, 4.787e-4  
-0.299, 4.806e-4  
-0.300, 4.825e-4  
-0.301, 4.850e-4  
-0.302, 4.874e-4  
-0.303, 4.906e-4  
-0.304, 4.930e-4  
-0.305, 4.938e-4  
-0.306, 4.954e-4  
-0.307, 4.995e-4  
-0.308, 5.034e-4  
-0.309, 5.064e-4  
-0.310, 5.097e-4  
-0.311, 5.129e-4  
-0.312, 5.161e-4  
-0.313, 5.198e-4  
-0.314, 5.228e-4  
-0.315, 5.265e-4  
-0.316, 5.294e-4  
-0.317, 5.331e-4  
-0.318, 5.373e-4  
-0.319, 5.409e-4  
-0.320, 5.449e-4  
-0.321, 5.485e-4



-0.322, 5.514e-4  
-0.323, 5.549e-4  
-0.324, 5.589e-4  
-0.325, 5.626e-4  
-0.326, 5.662e-4  
-0.327, 5.701e-4  
-0.328, 5.736e-4  
-0.329, 5.776e-4  
-0.330, 5.820e-4  
-0.331, 5.867e-4  
-0.332, 5.899e-4  
-0.333, 5.935e-4  
-0.334, 5.971e-4  
-0.335, 6.008e-4  
-0.336, 6.043e-4  
-0.337, 6.090e-4  
-0.338, 6.135e-4  
-0.339, 6.161e-4  
-0.340, 6.188e-4  
-0.341, 6.224e-4  
-0.342, 6.265e-4  
-0.343, 6.308e-4  
-0.344, 6.358e-4  
-0.345, 6.409e-4  
-0.346, 6.450e-4  
-0.347, 6.480e-4  
-0.348, 6.498e-4  
-0.349, 6.529e-4  
-0.350, 6.559e-4  
-0.351, 6.581e-4  
-0.352, 6.629e-4  
-0.353, 6.674e-4  
-0.354, 6.691e-4  
-0.355, 6.720e-4  
-0.356, 6.757e-4  
-0.357, 6.779e-4  
-0.358, 6.825e-4  
-0.359, 6.867e-4  
-0.360, 6.893e-4  
-0.361, 6.922e-4  
-0.362, 6.967e-4  
-0.363, 7.007e-4  
-0.364, 7.015e-4  
-0.365, 7.043e-4  
-0.366, 7.075e-4  
-0.367, 7.110e-4  
-0.368, 7.139e-4  
-0.369, 7.171e-4  
-0.370, 7.195e-4  
-0.371, 7.207e-4

-0.372, 7.226e-4  
-0.373, 7.260e-4  
-0.374, 7.291e-4  
-0.375, 7.321e-4  
-0.376, 7.349e-4  
-0.377, 7.361e-4  
-0.378, 7.371e-4  
-0.379, 7.395e-4  
-0.380, 7.417e-4  
-0.381, 7.454e-4  
-0.382, 7.467e-4  
-0.383, 7.492e-4  
-0.384, 7.517e-4  
-0.385, 7.538e-4  
-0.386, 7.556e-4  
-0.387, 7.576e-4  
-0.388, 7.592e-4  
-0.389, 7.611e-4  
-0.390, 7.633e-4  
-0.391, 7.669e-4  
-0.392, 7.694e-4  
-0.393, 7.706e-4  
-0.394, 7.714e-4  
-0.395, 7.730e-4  
-0.396, 7.756e-4  
-0.397, 7.780e-4  
-0.398, 7.795e-4  
-0.399, 7.816e-4

**Table S3.** RDE data of compound **1** at pH=4.9 under N<sub>2</sub>. Potentials vs Ag/AgCl.

Mar. 30, 2021 03:52:00

Linear Sweep Voltammetry

File: c:\users\shadji04\desktop\sofia cv\30032021\complex 6 sweep experiment under n2\100 rpm\_25 mv rate.txt

Data Source: Experiment

Instrument Model: CHI650E

Header: 100 rpm

Note:

Init E (V) = 0.8

Final E (V) = -0.4

Scan Rate (V/s) = 0.025

Sample Interval (V) = 0.001

Quiet Time (sec) = 2

Sensitivity (A/V) = 0.001

Potential/V, Current/A

0.800, -5.068e-5

0.799, -5.030e-5

0.798, -5.002e-5

0.797, -4.978e-5

0.796, -4.954e-5

0.795, -4.934e-5

0.794, -4.914e-5

0.793, -4.893e-5

0.792, -4.880e-5

0.791, -4.863e-5

0.790, -4.848e-5

0.789, -4.834e-5

0.788, -4.815e-5

0.787, -4.799e-5

0.786, -4.783e-5

0.785, -4.769e-5

0.784, -4.754e-5

0.783, -4.741e-5

0.782, -4.729e-5

0.781, -4.717e-5

0.780, -4.704e-5

0.779, -4.693e-5

0.778, -4.682e-5

0.777, -4.675e-5

0.776, -4.663e-5

0.775, -4.654e-5

0.774, -4.646e-5

0.773, -4.637e-5

0.772, -4.625e-5

0.771, -4.613e-5

0.770, -4.605e-5

0.769, -4.596e-5

0.768, -4.583e-5  
0.767, -4.575e-5  
0.766, -4.568e-5  
0.765, -4.558e-5  
0.764, -4.552e-5  
0.763, -4.543e-5  
0.762, -4.538e-5  
0.761, -4.527e-5  
0.760, -4.518e-5  
0.759, -4.513e-5  
0.758, -4.505e-5  
0.757, -4.496e-5  
0.756, -4.488e-5  
0.755, -4.480e-5  
0.754, -4.472e-5  
0.753, -4.464e-5  
0.752, -4.458e-5  
0.751, -4.449e-5  
0.750, -4.440e-5  
0.749, -4.432e-5  
0.748, -4.425e-5  
0.747, -4.421e-5  
0.746, -4.411e-5  
0.745, -4.406e-5  
0.744, -4.401e-5  
0.743, -4.393e-5  
0.742, -4.386e-5  
0.741, -4.378e-5  
0.740, -4.370e-5  
0.739, -4.364e-5  
0.738, -4.355e-5  
0.737, -4.347e-5  
0.736, -4.341e-5  
0.735, -4.334e-5  
0.734, -4.330e-5  
0.733, -4.324e-5  
0.732, -4.319e-5  
0.731, -4.311e-5  
0.730, -4.306e-5  
0.729, -4.300e-5  
0.728, -4.293e-5  
0.727, -4.283e-5  
0.726, -4.275e-5  
0.725, -4.268e-5  
0.724, -4.262e-5  
0.723, -4.255e-5  
0.722, -4.248e-5  
0.721, -4.240e-5  
0.720, -4.234e-5  
0.719, -4.226e-5

0.718, -4.220e-5  
0.717, -4.212e-5  
0.716, -4.205e-5  
0.715, -4.201e-5  
0.714, -4.193e-5  
0.713, -4.187e-5  
0.712, -4.179e-5  
0.711, -4.171e-5  
0.710, -4.162e-5  
0.709, -4.155e-5  
0.708, -4.149e-5  
0.707, -4.143e-5  
0.706, -4.132e-5  
0.705, -4.126e-5  
0.704, -4.118e-5  
0.703, -4.111e-5  
0.702, -4.104e-5  
0.701, -4.100e-5  
0.700, -4.096e-5  
0.699, -4.089e-5  
0.698, -4.079e-5  
0.697, -4.071e-5  
0.696, -4.064e-5  
0.695, -4.056e-5  
0.694, -4.050e-5  
0.693, -4.043e-5  
0.692, -4.033e-5  
0.691, -4.026e-5  
0.690, -4.019e-5  
0.689, -4.010e-5  
0.688, -4.003e-5  
0.687, -3.997e-5  
0.686, -3.990e-5  
0.685, -3.983e-5  
0.684, -3.974e-5  
0.683, -3.967e-5  
0.682, -3.957e-5  
0.681, -3.948e-5  
0.680, -3.941e-5  
0.679, -3.929e-5  
0.678, -3.921e-5  
0.677, -3.913e-5  
0.676, -3.903e-5  
0.675, -3.896e-5  
0.674, -3.886e-5  
0.673, -3.875e-5  
0.672, -3.867e-5  
0.671, -3.861e-5  
0.670, -3.852e-5  
0.669, -3.842e-5

0.668, -3.836e-5  
0.667, -3.828e-5  
0.666, -3.821e-5  
0.665, -3.812e-5  
0.664, -3.801e-5  
0.663, -3.793e-5  
0.662, -3.782e-5  
0.661, -3.773e-5  
0.660, -3.764e-5  
0.659, -3.753e-5  
0.658, -3.745e-5  
0.657, -3.733e-5  
0.656, -3.726e-5  
0.655, -3.715e-5  
0.654, -3.704e-5  
0.653, -3.693e-5  
0.652, -3.682e-5  
0.651, -3.672e-5  
0.650, -3.661e-5  
0.649, -3.653e-5  
0.648, -3.642e-5  
0.647, -3.632e-5  
0.646, -3.620e-5  
0.645, -3.610e-5  
0.644, -3.596e-5  
0.643, -3.587e-5  
0.642, -3.577e-5  
0.641, -3.565e-5  
0.640, -3.554e-5  
0.639, -3.543e-5  
0.638, -3.531e-5  
0.637, -3.518e-5  
0.636, -3.508e-5  
0.635, -3.498e-5  
0.634, -3.488e-5  
0.633, -3.478e-5  
0.632, -3.466e-5  
0.631, -3.455e-5  
0.630, -3.442e-5  
0.629, -3.431e-5  
0.628, -3.422e-5  
0.627, -3.410e-5  
0.626, -3.399e-5  
0.625, -3.387e-5  
0.624, -3.378e-5  
0.623, -3.368e-5  
0.622, -3.357e-5  
0.621, -3.347e-5  
0.620, -3.336e-5  
0.619, -3.325e-5

0.618, -3.316e-5  
0.617, -3.305e-5  
0.616, -3.294e-5  
0.615, -3.283e-5  
0.614, -3.274e-5  
0.613, -3.264e-5  
0.612, -3.253e-5  
0.611, -3.244e-5  
0.610, -3.233e-5  
0.609, -3.224e-5  
0.608, -3.213e-5  
0.607, -3.205e-5  
0.606, -3.197e-5  
0.605, -3.187e-5  
0.604, -3.178e-5  
0.603, -3.170e-5  
0.602, -3.160e-5  
0.601, -3.151e-5  
0.600, -3.141e-5  
0.599, -3.132e-5  
0.598, -3.126e-5  
0.597, -3.117e-5  
0.596, -3.109e-5  
0.595, -3.101e-5  
0.594, -3.093e-5  
0.593, -3.086e-5  
0.592, -3.076e-5  
0.591, -3.065e-5  
0.590, -3.058e-5  
0.589, -3.051e-5  
0.588, -3.044e-5  
0.587, -3.037e-5  
0.586, -3.027e-5  
0.585, -3.017e-5  
0.584, -3.010e-5  
0.583, -3.002e-5  
0.582, -2.997e-5  
0.581, -2.991e-5  
0.580, -2.982e-5  
0.579, -2.974e-5  
0.578, -2.964e-5  
0.577, -2.957e-5  
0.576, -2.950e-5  
0.575, -2.941e-5  
0.574, -2.933e-5  
0.573, -2.925e-5  
0.572, -2.916e-5  
0.571, -2.910e-5  
0.570, -2.900e-5  
0.569, -2.893e-5

0.568, -2.886e-5  
0.567, -2.880e-5  
0.566, -2.873e-5  
0.565, -2.864e-5  
0.564, -2.855e-5  
0.563, -2.845e-5  
0.562, -2.835e-5  
0.561, -2.827e-5  
0.560, -2.819e-5  
0.559, -2.809e-5  
0.558, -2.801e-5  
0.557, -2.793e-5  
0.556, -2.784e-5  
0.555, -2.775e-5  
0.554, -2.765e-5  
0.553, -2.757e-5  
0.552, -2.749e-5  
0.551, -2.740e-5  
0.550, -2.727e-5  
0.549, -2.718e-5  
0.548, -2.707e-5  
0.547, -2.694e-5  
0.546, -2.682e-5  
0.545, -2.668e-5  
0.544, -2.659e-5  
0.543, -2.649e-5  
0.542, -2.636e-5  
0.541, -2.623e-5  
0.540, -2.609e-5  
0.539, -2.601e-5  
0.538, -2.587e-5  
0.537, -2.576e-5  
0.536, -2.566e-5  
0.535, -2.552e-5  
0.534, -2.539e-5  
0.533, -2.523e-5  
0.532, -2.508e-5  
0.531, -2.495e-5  
0.530, -2.480e-5  
0.529, -2.466e-5  
0.528, -2.451e-5  
0.527, -2.435e-5  
0.526, -2.419e-5  
0.525, -2.401e-5  
0.524, -2.387e-5  
0.523, -2.373e-5  
0.522, -2.358e-5  
0.521, -2.343e-5  
0.520, -2.325e-5  
0.519, -2.307e-5



0.518, -2.287e-5  
0.517, -2.269e-5  
0.516, -2.250e-5  
0.515, -2.233e-5  
0.514, -2.213e-5  
0.513, -2.196e-5  
0.512, -2.176e-5  
0.511, -2.155e-5  
0.510, -2.136e-5  
0.509, -2.118e-5  
0.508, -2.097e-5  
0.507, -2.080e-5  
0.506, -2.058e-5  
0.505, -2.037e-5  
0.504, -2.015e-5  
0.503, -1.991e-5  
0.502, -1.971e-5  
0.501, -1.951e-5  
0.500, -1.928e-5  
0.499, -1.907e-5  
0.498, -1.884e-5  
0.497, -1.861e-5  
0.496, -1.836e-5  
0.495, -1.812e-5  
0.494, -1.793e-5  
0.493, -1.770e-5  
0.492, -1.747e-5  
0.491, -1.724e-5  
0.490, -1.700e-5  
0.489, -1.675e-5  
0.488, -1.650e-5  
0.487, -1.623e-5  
0.486, -1.600e-5  
0.485, -1.579e-5  
0.484, -1.553e-5  
0.483, -1.530e-5  
0.482, -1.507e-5  
0.481, -1.482e-5  
0.480, -1.459e-5  
0.479, -1.433e-5  
0.478, -1.409e-5  
0.477, -1.386e-5  
0.476, -1.360e-5  
0.475, -1.338e-5  
0.474, -1.313e-5  
0.473, -1.288e-5  
0.472, -1.265e-5  
0.471, -1.241e-5  
0.470, -1.219e-5  
0.469, -1.195e-5

0.468, -1.168e-5  
0.467, -1.146e-5  
0.466, -1.123e-5  
0.465, -1.104e-5  
0.464, -1.084e-5  
0.463, -1.062e-5  
0.462, -1.041e-5  
0.461, -1.018e-5  
0.460, -9.955e-6  
0.459, -9.753e-6  
0.458, -9.494e-6  
0.457, -9.298e-6  
0.456, -9.128e-6  
0.455, -8.957e-6  
0.454, -8.785e-6  
0.453, -8.586e-6  
0.452, -8.389e-6  
0.451, -8.218e-6  
0.450, -8.059e-6  
0.449, -7.892e-6  
0.448, -7.717e-6  
0.447, -7.554e-6  
0.446, -7.394e-6  
0.445, -7.247e-6  
0.444, -7.085e-6  
0.443, -6.937e-6  
0.442, -6.783e-6  
0.441, -6.647e-6  
0.440, -6.520e-6  
0.439, -6.358e-6  
0.438, -6.242e-6  
0.437, -6.132e-6  
0.436, -6.007e-6  
0.435, -5.915e-6  
0.434, -5.799e-6  
0.433, -5.703e-6  
0.432, -5.595e-6  
0.431, -5.478e-6  
0.430, -5.383e-6  
0.429, -5.269e-6  
0.428, -5.157e-6  
0.427, -5.076e-6  
0.426, -4.978e-6  
0.425, -4.892e-6  
0.424, -4.789e-6  
0.423, -4.695e-6  
0.422, -4.613e-6  
0.421, -4.523e-6  
0.420, -4.470e-6  
0.419, -4.381e-6

0.418, -4.312e-6  
0.417, -4.234e-6  
0.416, -4.150e-6  
0.415, -4.058e-6  
0.414, -4.005e-6  
0.413, -3.928e-6  
0.412, -3.867e-6  
0.411, -3.804e-6  
0.410, -3.721e-6  
0.409, -3.631e-6  
0.408, -3.569e-6  
0.407, -3.499e-6  
0.406, -3.450e-6  
0.405, -3.400e-6  
0.404, -3.331e-6  
0.403, -3.261e-6  
0.402, -3.199e-6  
0.401, -3.139e-6  
0.400, -3.101e-6  
0.399, -3.039e-6  
0.398, -2.973e-6  
0.397, -2.883e-6  
0.396, -2.842e-6  
0.395, -2.778e-6  
0.394, -2.704e-6  
0.393, -2.666e-6  
0.392, -2.608e-6  
0.391, -2.554e-6  
0.390, -2.511e-6  
0.389, -2.437e-6  
0.388, -2.383e-6  
0.387, -2.339e-6  
0.386, -2.278e-6  
0.385, -2.211e-6  
0.384, -2.145e-6  
0.383, -2.091e-6  
0.382, -2.052e-6  
0.381, -1.980e-6  
0.380, -1.923e-6  
0.379, -1.878e-6  
0.378, -1.801e-6  
0.377, -1.741e-6  
0.376, -1.703e-6  
0.375, -1.647e-6  
0.374, -1.617e-6  
0.373, -1.564e-6  
0.372, -1.509e-6  
0.371, -1.437e-6  
0.370, -1.387e-6  
0.369, -1.332e-6

0.368, -1.275e-6  
0.367, -1.240e-6  
0.366, -1.200e-6  
0.365, -1.146e-6  
0.364, -1.085e-6  
0.363, -1.056e-6  
0.362, -1.008e-6  
0.361, -9.840e-7  
0.360, -9.398e-7  
0.359, -8.848e-7  
0.358, -8.425e-7  
0.357, -7.895e-7  
0.356, -7.295e-7  
0.355, -6.932e-7  
0.354, -6.382e-7  
0.353, -5.841e-7  
0.352, -5.419e-7  
0.351, -4.918e-7  
0.350, -4.662e-7  
0.349, -4.053e-7  
0.348, -3.543e-7  
0.347, -3.336e-7  
0.346, -2.884e-7  
0.345, -2.590e-7  
0.344, -2.334e-7  
0.343, -1.990e-7  
0.342, -1.509e-7  
0.341, -1.204e-7  
0.340, -7.329e-8  
0.339, -2.711e-8  
0.338, 1.120e-8  
0.337, 4.165e-8  
0.336, 7.997e-8  
0.335, 1.232e-7  
0.334, 1.448e-7  
0.333, 1.831e-7  
0.332, 2.126e-7  
0.331, 2.430e-7  
0.330, 2.804e-7  
0.329, 3.403e-7  
0.328, 3.600e-7  
0.327, 3.934e-7  
0.326, 4.385e-7  
0.325, 4.729e-7  
0.324, 4.985e-7  
0.323, 5.201e-7  
0.322, 5.525e-7  
0.321, 5.879e-7  
0.320, 6.095e-7  
0.319, 6.684e-7

0.318, 7.117e-7  
0.317, 7.274e-7  
0.316, 7.549e-7  
0.315, 7.745e-7  
0.314, 8.276e-7  
0.313, 8.629e-7  
0.312, 8.767e-7  
0.311, 9.140e-7  
0.310, 9.494e-7  
0.309, 9.789e-7  
0.308, 1.000e-6  
0.307, 1.030e-6  
0.306, 1.053e-6  
0.305, 1.094e-6  
0.304, 1.124e-6  
0.303, 1.159e-6  
0.302, 1.182e-6  
0.301, 1.198e-6  
0.300, 1.241e-6  
0.299, 1.274e-6  
0.298, 1.316e-6  
0.297, 1.379e-6  
0.296, 1.393e-6  
0.295, 1.412e-6  
0.294, 1.430e-6  
0.293, 1.460e-6  
0.292, 1.477e-6  
0.291, 1.493e-6  
0.290, 1.523e-6  
0.289, 1.557e-6  
0.288, 1.585e-6  
0.287, 1.616e-6  
0.286, 1.648e-6  
0.285, 1.669e-6  
0.284, 1.705e-6  
0.283, 1.728e-6  
0.282, 1.755e-6  
0.281, 1.788e-6  
0.280, 1.827e-6  
0.279, 1.863e-6  
0.278, 1.898e-6  
0.277, 1.908e-6  
0.276, 1.941e-6  
0.275, 1.979e-6  
0.274, 2.032e-6  
0.273, 2.058e-6  
0.272, 2.056e-6  
0.271, 2.083e-6  
0.270, 2.127e-6  
0.269, 2.146e-6

0.268, 2.180e-6  
0.267, 2.224e-6  
0.266, 2.248e-6  
0.265, 2.268e-6  
0.264, 2.298e-6  
0.263, 2.337e-6  
0.262, 2.364e-6  
0.261, 2.386e-6  
0.260, 2.429e-6  
0.259, 2.461e-6  
0.258, 2.485e-6  
0.257, 2.511e-6  
0.256, 2.551e-6  
0.255, 2.610e-6  
0.254, 2.624e-6  
0.253, 2.657e-6  
0.252, 2.687e-6  
0.251, 2.712e-6  
0.250, 2.744e-6  
0.249, 2.772e-6  
0.248, 2.816e-6  
0.247, 2.835e-6  
0.246, 2.872e-6  
0.245, 2.891e-6  
0.244, 2.931e-6  
0.243, 2.976e-6  
0.242, 3.000e-6  
0.241, 3.031e-6  
0.240, 3.055e-6  
0.239, 3.093e-6  
0.238, 3.155e-6  
0.237, 3.177e-6  
0.236, 3.213e-6  
0.235, 3.237e-6  
0.234, 3.261e-6  
0.233, 3.304e-6  
0.232, 3.334e-6  
0.231, 3.374e-6  
0.230, 3.421e-6  
0.229, 3.471e-6  
0.228, 3.496e-6  
0.227, 3.531e-6  
0.226, 3.563e-6  
0.225, 3.586e-6  
0.224, 3.609e-6  
0.223, 3.648e-6  
0.222, 3.701e-6  
0.221, 3.745e-6  
0.220, 3.789e-6  
0.219, 3.816e-6

0.218, 3.841e-6  
0.217, 3.873e-6  
0.216, 3.906e-6  
0.215, 3.955e-6  
0.214, 3.991e-6  
0.213, 4.029e-6  
0.212, 4.070e-6  
0.211, 4.089e-6  
0.210, 4.135e-6  
0.209, 4.188e-6  
0.208, 4.228e-6  
0.207, 4.266e-6  
0.206, 4.296e-6  
0.205, 4.349e-6  
0.204, 4.380e-6  
0.203, 4.430e-6  
0.202, 4.480e-6  
0.201, 4.509e-6  
0.200, 4.542e-6  
0.199, 4.582e-6  
0.198, 4.618e-6  
0.197, 4.665e-6  
0.196, 4.716e-6  
0.195, 4.759e-6  
0.194, 4.796e-6  
0.193, 4.849e-6  
0.192, 4.891e-6  
0.191, 4.936e-6  
0.190, 4.976e-6  
0.189, 5.026e-6  
0.188, 5.075e-6  
0.187, 5.127e-6  
0.186, 5.188e-6  
0.185, 5.235e-6  
0.184, 5.277e-6  
0.183, 5.332e-6  
0.182, 5.382e-6  
0.181, 5.438e-6  
0.180, 5.494e-6  
0.179, 5.541e-6  
0.178, 5.600e-6  
0.177, 5.660e-6  
0.176, 5.717e-6  
0.175, 5.790e-6  
0.174, 5.835e-6  
0.173, 5.919e-6  
0.172, 5.965e-6  
0.171, 6.028e-6  
0.170, 6.083e-6  
0.169, 6.162e-6

0.168, 6.231e-6  
0.167, 6.282e-6  
0.166, 6.346e-6  
0.165, 6.420e-6  
0.164, 6.489e-6  
0.163, 6.559e-6  
0.162, 6.646e-6  
0.161, 6.715e-6  
0.160, 6.791e-6  
0.159, 6.867e-6  
0.158, 6.944e-6  
0.157, 7.030e-6  
0.156, 7.121e-6  
0.155, 7.205e-6  
0.154, 7.294e-6  
0.153, 7.380e-6  
0.152, 7.467e-6  
0.151, 7.564e-6  
0.150, 7.671e-6  
0.149, 7.779e-6  
0.148, 7.866e-6  
0.147, 7.981e-6  
0.146, 8.118e-6  
0.145, 8.213e-6  
0.144, 8.304e-6  
0.143, 8.421e-6  
0.142, 8.559e-6  
0.141, 8.671e-6  
0.140, 8.808e-6  
0.139, 8.916e-6  
0.138, 9.038e-6  
0.137, 9.163e-6  
0.136, 9.289e-6  
0.135, 9.430e-6  
0.134, 9.549e-6  
0.133, 9.692e-6  
0.132, 9.869e-6  
0.131, 9.989e-6  
0.130, 1.014e-5  
0.129, 1.030e-5  
0.128, 1.043e-5  
0.127, 1.058e-5  
0.126, 1.075e-5  
0.125, 1.090e-5  
0.124, 1.106e-5  
0.123, 1.124e-5  
0.122, 1.143e-5  
0.121, 1.160e-5  
0.120, 1.178e-5  
0.119, 1.195e-5



0.118, 1.213e-5  
0.117, 1.231e-5  
0.116, 1.249e-5  
0.115, 1.265e-5  
0.114, 1.282e-5  
0.113, 1.302e-5  
0.112, 1.320e-5  
0.111, 1.343e-5  
0.110, 1.361e-5  
0.109, 1.378e-5  
0.108, 1.398e-5  
0.107, 1.416e-5  
0.106, 1.435e-5  
0.105, 1.456e-5  
0.104, 1.476e-5  
0.103, 1.497e-5  
0.102, 1.517e-5  
0.101, 1.537e-5  
0.100, 1.558e-5  
0.099, 1.576e-5  
0.098, 1.598e-5  
0.097, 1.618e-5  
0.096, 1.638e-5  
0.095, 1.658e-5  
0.094, 1.675e-5  
0.093, 1.694e-5  
0.092, 1.713e-5  
0.091, 1.732e-5  
0.090, 1.753e-5  
0.089, 1.773e-5  
0.088, 1.795e-5  
0.087, 1.813e-5  
0.086, 1.833e-5  
0.085, 1.850e-5  
0.084, 1.864e-5  
0.083, 1.881e-5  
0.082, 1.901e-5  
0.081, 1.917e-5  
0.080, 1.934e-5  
0.079, 1.952e-5  
0.078, 1.968e-5  
0.077, 1.983e-5  
0.076, 2.001e-5  
0.075, 2.016e-5  
0.074, 2.032e-5  
0.073, 2.046e-5  
0.072, 2.061e-5  
0.071, 2.077e-5  
0.070, 2.088e-5  
0.069, 2.101e-5

0.068, 2.113e-5  
0.067, 2.126e-5  
0.066, 2.139e-5  
0.065, 2.152e-5  
0.064, 2.163e-5  
0.063, 2.173e-5  
0.062, 2.182e-5  
0.061, 2.194e-5  
0.060, 2.204e-5  
0.059, 2.214e-5  
0.058, 2.225e-5  
0.057, 2.234e-5  
0.056, 2.243e-5  
0.055, 2.252e-5  
0.054, 2.262e-5  
0.053, 2.270e-5  
0.052, 2.279e-5  
0.051, 2.287e-5  
0.050, 2.295e-5  
0.049, 2.304e-5  
0.048, 2.310e-5  
0.047, 2.317e-5  
0.046, 2.327e-5  
0.045, 2.334e-5  
0.044, 2.341e-5  
0.043, 2.348e-5  
0.042, 2.355e-5  
0.041, 2.363e-5  
0.040, 2.368e-5  
0.039, 2.375e-5  
0.038, 2.383e-5  
0.037, 2.390e-5  
0.036, 2.395e-5  
0.035, 2.398e-5  
0.034, 2.406e-5  
0.033, 2.412e-5  
0.032, 2.418e-5  
0.031, 2.424e-5  
0.030, 2.428e-5  
0.029, 2.433e-5  
0.028, 2.440e-5  
0.027, 2.444e-5  
0.026, 2.450e-5  
0.025, 2.454e-5  
0.024, 2.459e-5  
0.023, 2.465e-5  
0.022, 2.470e-5  
0.021, 2.476e-5  
0.020, 2.482e-5  
0.019, 2.485e-5

0.018, 2.487e-5  
0.017, 2.493e-5  
0.016, 2.499e-5  
0.015, 2.505e-5  
0.014, 2.512e-5  
0.013, 2.516e-5  
0.012, 2.520e-5  
0.011, 2.524e-5  
0.010, 2.528e-5  
0.009, 2.533e-5  
0.008, 2.540e-5  
0.007, 2.547e-5  
0.006, 2.553e-5  
0.005, 2.556e-5  
0.004, 2.561e-5  
0.003, 2.565e-5  
0.002, 2.570e-5  
0.001, 2.576e-5  
0.000, 2.585e-5  
-0.001, 2.593e-5  
-0.002, 2.598e-5  
-0.003, 2.603e-5  
-0.004, 2.607e-5  
-0.005, 2.609e-5  
-0.006, 2.616e-5  
-0.007, 2.622e-5  
-0.008, 2.627e-5  
-0.009, 2.632e-5  
-0.010, 2.638e-5  
-0.011, 2.643e-5  
-0.012, 2.652e-5  
-0.013, 2.658e-5  
-0.014, 2.663e-5  
-0.015, 2.669e-5  
-0.016, 2.673e-5  
-0.017, 2.679e-5  
-0.018, 2.686e-5  
-0.019, 2.692e-5  
-0.020, 2.698e-5  
-0.021, 2.702e-5  
-0.022, 2.709e-5  
-0.023, 2.715e-5  
-0.024, 2.720e-5  
-0.025, 2.730e-5  
-0.026, 2.735e-5  
-0.027, 2.741e-5  
-0.028, 2.751e-5  
-0.029, 2.756e-5  
-0.030, 2.762e-5  
-0.031, 2.769e-5

-0.032, 2.774e-5  
-0.033, 2.780e-5  
-0.034, 2.785e-5  
-0.035, 2.789e-5  
-0.036, 2.796e-5  
-0.037, 2.805e-5  
-0.038, 2.811e-5  
-0.039, 2.817e-5  
-0.040, 2.823e-5  
-0.041, 2.829e-5  
-0.042, 2.835e-5  
-0.043, 2.842e-5  
-0.044, 2.849e-5  
-0.045, 2.856e-5  
-0.046, 2.862e-5  
-0.047, 2.869e-5  
-0.048, 2.876e-5  
-0.049, 2.884e-5  
-0.050, 2.892e-5  
-0.051, 2.900e-5  
-0.052, 2.906e-5  
-0.053, 2.911e-5  
-0.054, 2.918e-5  
-0.055, 2.927e-5  
-0.056, 2.936e-5  
-0.057, 2.943e-5  
-0.058, 2.951e-5  
-0.059, 2.959e-5  
-0.060, 2.965e-5  
-0.061, 2.972e-5  
-0.062, 2.979e-5  
-0.063, 2.987e-5  
-0.064, 2.992e-5  
-0.065, 2.998e-5  
-0.066, 3.005e-5  
-0.067, 3.014e-5  
-0.068, 3.022e-5  
-0.069, 3.029e-5  
-0.070, 3.037e-5  
-0.071, 3.045e-5  
-0.072, 3.051e-5  
-0.073, 3.059e-5  
-0.074, 3.067e-5  
-0.075, 3.077e-5  
-0.076, 3.085e-5  
-0.077, 3.091e-5  
-0.078, 3.097e-5  
-0.079, 3.104e-5  
-0.080, 3.111e-5  
-0.081, 3.120e-5

-0.082, 3.128e-5  
-0.083, 3.135e-5  
-0.084, 3.143e-5  
-0.085, 3.151e-5  
-0.086, 3.159e-5  
-0.087, 3.167e-5  
-0.088, 3.177e-5  
-0.089, 3.185e-5  
-0.090, 3.193e-5  
-0.091, 3.200e-5  
-0.092, 3.210e-5  
-0.093, 3.219e-5  
-0.094, 3.226e-5  
-0.095, 3.233e-5  
-0.096, 3.242e-5  
-0.097, 3.250e-5  
-0.098, 3.259e-5  
-0.099, 3.266e-5  
-0.100, 3.276e-5  
-0.101, 3.283e-5  
-0.102, 3.292e-5  
-0.103, 3.302e-5  
-0.104, 3.310e-5  
-0.105, 3.317e-5  
-0.106, 3.326e-5  
-0.107, 3.336e-5  
-0.108, 3.344e-5  
-0.109, 3.351e-5  
-0.110, 3.357e-5  
-0.111, 3.366e-5  
-0.112, 3.373e-5  
-0.113, 3.382e-5  
-0.114, 3.393e-5  
-0.115, 3.402e-5  
-0.116, 3.410e-5  
-0.117, 3.420e-5  
-0.118, 3.429e-5  
-0.119, 3.438e-5  
-0.120, 3.444e-5  
-0.121, 3.453e-5  
-0.122, 3.462e-5  
-0.123, 3.471e-5  
-0.124, 3.480e-5  
-0.125, 3.490e-5  
-0.126, 3.499e-5  
-0.127, 3.505e-5  
-0.128, 3.511e-5  
-0.129, 3.521e-5  
-0.130, 3.531e-5  
-0.131, 3.538e-5

-0.132, 3.546e-5  
-0.133, 3.555e-5  
-0.134, 3.564e-5  
-0.135, 3.572e-5  
-0.136, 3.580e-5  
-0.137, 3.589e-5  
-0.138, 3.598e-5  
-0.139, 3.607e-5  
-0.140, 3.616e-5  
-0.141, 3.625e-5  
-0.142, 3.633e-5  
-0.143, 3.641e-5  
-0.144, 3.651e-5  
-0.145, 3.660e-5  
-0.146, 3.668e-5  
-0.147, 3.679e-5  
-0.148, 3.690e-5  
-0.149, 3.700e-5  
-0.150, 3.708e-5  
-0.151, 3.716e-5  
-0.152, 3.725e-5  
-0.153, 3.734e-5  
-0.154, 3.743e-5  
-0.155, 3.753e-5  
-0.156, 3.763e-5  
-0.157, 3.770e-5  
-0.158, 3.778e-5  
-0.159, 3.789e-5  
-0.160, 3.799e-5  
-0.161, 3.810e-5  
-0.162, 3.819e-5  
-0.163, 3.829e-5  
-0.164, 3.841e-5  
-0.165, 3.851e-5  
-0.166, 3.862e-5  
-0.167, 3.872e-5  
-0.168, 3.880e-5  
-0.169, 3.889e-5  
-0.170, 3.900e-5  
-0.171, 3.910e-5  
-0.172, 3.920e-5  
-0.173, 3.928e-5  
-0.174, 3.940e-5  
-0.175, 3.950e-5  
-0.176, 3.964e-5  
-0.177, 3.976e-5  
-0.178, 3.985e-5  
-0.179, 3.997e-5  
-0.180, 4.010e-5  
-0.181, 4.018e-5

-0.182, 4.029e-5  
-0.183, 4.040e-5  
-0.184, 4.050e-5  
-0.185, 4.062e-5  
-0.186, 4.072e-5  
-0.187, 4.084e-5  
-0.188, 4.094e-5  
-0.189, 4.106e-5  
-0.190, 4.119e-5  
-0.191, 4.131e-5  
-0.192, 4.143e-5  
-0.193, 4.156e-5  
-0.194, 4.167e-5  
-0.195, 4.180e-5  
-0.196, 4.191e-5  
-0.197, 4.205e-5  
-0.198, 4.217e-5  
-0.199, 4.230e-5  
-0.200, 4.243e-5  
-0.201, 4.258e-5  
-0.202, 4.272e-5  
-0.203, 4.282e-5  
-0.204, 4.295e-5  
-0.205, 4.307e-5  
-0.206, 4.322e-5  
-0.207, 4.335e-5  
-0.208, 4.347e-5  
-0.209, 4.360e-5  
-0.210, 4.371e-5  
-0.211, 4.385e-5  
-0.212, 4.399e-5  
-0.213, 4.410e-5  
-0.214, 4.425e-5  
-0.215, 4.439e-5  
-0.216, 4.453e-5  
-0.217, 4.465e-5  
-0.218, 4.476e-5  
-0.219, 4.491e-5  
-0.220, 4.504e-5  
-0.221, 4.521e-5  
-0.222, 4.534e-5  
-0.223, 4.547e-5  
-0.224, 4.559e-5  
-0.225, 4.571e-5  
-0.226, 4.582e-5  
-0.227, 4.592e-5  
-0.228, 4.602e-5  
-0.229, 4.615e-5  
-0.230, 4.627e-5  
-0.231, 4.638e-5

-0.232, 4.648e-5  
-0.233, 4.661e-5  
-0.234, 4.674e-5  
-0.235, 4.686e-5  
-0.236, 4.701e-5  
-0.237, 4.713e-5  
-0.238, 4.725e-5  
-0.239, 4.735e-5  
-0.240, 4.746e-5  
-0.241, 4.758e-5  
-0.242, 4.766e-5  
-0.243, 4.777e-5  
-0.244, 4.786e-5  
-0.245, 4.795e-5  
-0.246, 4.802e-5  
-0.247, 4.809e-5  
-0.248, 4.818e-5  
-0.249, 4.827e-5  
-0.250, 4.835e-5  
-0.251, 4.845e-5  
-0.252, 4.855e-5  
-0.253, 4.864e-5  
-0.254, 4.872e-5  
-0.255, 4.875e-5  
-0.256, 4.883e-5  
-0.257, 4.891e-5  
-0.258, 4.895e-5  
-0.259, 4.899e-5  
-0.260, 4.907e-5  
-0.261, 4.912e-5  
-0.262, 4.914e-5  
-0.263, 4.921e-5  
-0.264, 4.925e-5  
-0.265, 4.932e-5  
-0.266, 4.939e-5  
-0.267, 4.942e-5  
-0.268, 4.946e-5  
-0.269, 4.948e-5  
-0.270, 4.951e-5  
-0.271, 4.955e-5  
-0.272, 4.956e-5  
-0.273, 4.960e-5  
-0.274, 4.965e-5  
-0.275, 4.966e-5  
-0.276, 4.969e-5  
-0.277, 4.967e-5  
-0.278, 4.971e-5  
-0.279, 4.972e-5  
-0.280, 4.975e-5  
-0.281, 4.980e-5



-0.282, 4.983e-5  
-0.283, 4.985e-5  
-0.284, 4.987e-5  
-0.285, 4.988e-5  
-0.286, 4.991e-5  
-0.287, 4.993e-5  
-0.288, 4.993e-5  
-0.289, 4.995e-5  
-0.290, 4.997e-5  
-0.291, 4.998e-5  
-0.292, 4.998e-5  
-0.293, 5.002e-5  
-0.294, 5.004e-5  
-0.295, 5.008e-5  
-0.296, 5.010e-5  
-0.297, 5.013e-5  
-0.298, 5.017e-5  
-0.299, 5.016e-5  
-0.300, 5.019e-5  
-0.301, 5.019e-5  
-0.302, 5.021e-5  
-0.303, 5.022e-5  
-0.304, 5.022e-5  
-0.305, 5.027e-5  
-0.306, 5.028e-5  
-0.307, 5.029e-5  
-0.308, 5.031e-5  
-0.309, 5.030e-5  
-0.310, 5.035e-5  
-0.311, 5.038e-5  
-0.312, 5.043e-5  
-0.313, 5.045e-5  
-0.314, 5.045e-5  
-0.315, 5.048e-5  
-0.316, 5.050e-5  
-0.317, 5.052e-5  
-0.318, 5.053e-5  
-0.319, 5.055e-5  
-0.320, 5.053e-5  
-0.321, 5.056e-5  
-0.322, 5.057e-5  
-0.323, 5.059e-5  
-0.324, 5.061e-5  
-0.325, 5.065e-5  
-0.326, 5.068e-5  
-0.327, 5.071e-5  
-0.328, 5.073e-5  
-0.329, 5.077e-5  
-0.330, 5.080e-5  
-0.331, 5.080e-5

-0.332, 5.082e-5  
-0.333, 5.083e-5  
-0.334, 5.085e-5  
-0.335, 5.086e-5  
-0.336, 5.085e-5  
-0.337, 5.089e-5  
-0.338, 5.092e-5  
-0.339, 5.095e-5  
-0.340, 5.098e-5  
-0.341, 5.101e-5  
-0.342, 5.104e-5  
-0.343, 5.107e-5  
-0.344, 5.111e-5  
-0.345, 5.114e-5  
-0.346, 5.113e-5  
-0.347, 5.114e-5  
-0.348, 5.116e-5  
-0.349, 5.119e-5  
-0.350, 5.120e-5  
-0.351, 5.122e-5  
-0.352, 5.125e-5  
-0.353, 5.127e-5  
-0.354, 5.131e-5  
-0.355, 5.134e-5  
-0.356, 5.139e-5  
-0.357, 5.141e-5  
-0.358, 5.143e-5  
-0.359, 5.144e-5  
-0.360, 5.147e-5  
-0.361, 5.150e-5  
-0.362, 5.152e-5  
-0.363, 5.155e-5  
-0.364, 5.159e-5  
-0.365, 5.159e-5  
-0.366, 5.161e-5  
-0.367, 5.163e-5  
-0.368, 5.164e-5  
-0.369, 5.167e-5  
-0.370, 5.170e-5  
-0.371, 5.173e-5  
-0.372, 5.177e-5  
-0.373, 5.180e-5  
-0.374, 5.184e-5  
-0.375, 5.187e-5  
-0.376, 5.187e-5  
-0.377, 5.187e-5  
-0.378, 5.190e-5  
-0.379, 5.191e-5  
-0.380, 5.193e-5  
-0.381, 5.192e-5

-0.382, 5.197e-5  
-0.383, 5.199e-5  
-0.384, 5.203e-5  
-0.385, 5.209e-5  
-0.386, 5.211e-5  
-0.387, 5.213e-5  
-0.388, 5.214e-5  
-0.389, 5.216e-5  
-0.390, 5.219e-5  
-0.391, 5.221e-5  
-0.392, 5.223e-5  
-0.393, 5.224e-5  
-0.394, 5.225e-5  
-0.395, 5.226e-5  
-0.396, 5.229e-5  
-0.397, 5.232e-5  
-0.398, 5.233e-5  
-0.399, 5.238e-5

Mar. 30, 2021 03:55:33

Linear Sweep Voltammetry

File: c:\users\shadji04\desktop\sofia cv\30032021\complex 6 sweep experiment under n2\300 rpm\_25 mv rate.txt

Data Source: Experiment

Instrument Model: CHI650E

Header:

Note: 300 rpm

Init E (V) = 0.8

Final E (V) = -0.4

Scan Rate (V/s) = 0.025

Sample Interval (V) = 0.001

Quiet Time (sec) = 2

Sensitivity (A/V) = 0.001

Potential/V, Current/A

0.800, -7.683e-5

0.799, -7.646e-5

0.798, -7.620e-5

0.797, -7.603e-5

0.796, -7.578e-5

0.795, -7.556e-5

0.794, -7.540e-5

0.793, -7.526e-5

0.792, -7.519e-5

0.791, -7.504e-5

0.790, -7.490e-5

0.789, -7.476e-5

0.788, -7.463e-5

0.787, -7.457e-5

0.786, -7.441e-5

0.785, -7.424e-5

0.784, -7.410e-5

0.783, -7.396e-5  
0.782, -7.391e-5  
0.781, -7.375e-5  
0.780, -7.359e-5  
0.779, -7.346e-5  
0.778, -7.333e-5  
0.777, -7.327e-5  
0.776, -7.311e-5  
0.775, -7.291e-5  
0.774, -7.277e-5  
0.773, -7.267e-5  
0.772, -7.260e-5  
0.771, -7.247e-5  
0.770, -7.233e-5  
0.769, -7.219e-5  
0.768, -7.210e-5  
0.767, -7.205e-5  
0.766, -7.191e-5  
0.765, -7.176e-5  
0.764, -7.160e-5  
0.763, -7.149e-5  
0.762, -7.141e-5  
0.761, -7.129e-5  
0.760, -7.113e-5  
0.759, -7.098e-5  
0.758, -7.088e-5  
0.757, -7.082e-5  
0.756, -7.072e-5  
0.755, -7.059e-5  
0.754, -7.046e-5  
0.753, -7.035e-5  
0.752, -7.029e-5  
0.751, -7.017e-5  
0.750, -7.003e-5  
0.749, -6.990e-5  
0.748, -6.978e-5  
0.747, -6.973e-5  
0.746, -6.962e-5  
0.745, -6.948e-5  
0.744, -6.935e-5  
0.743, -6.922e-5  
0.742, -6.916e-5  
0.741, -6.905e-5  
0.740, -6.891e-5  
0.739, -6.878e-5  
0.738, -6.868e-5  
0.737, -6.861e-5  
0.736, -6.848e-5  
0.735, -6.835e-5  
0.734, -6.824e-5

0.733, -6.814e-5  
0.732, -6.809e-5  
0.731, -6.797e-5  
0.730, -6.783e-5  
0.729, -6.769e-5  
0.728, -6.758e-5  
0.727, -6.753e-5  
0.726, -6.739e-5  
0.725, -6.724e-5  
0.724, -6.711e-5  
0.723, -6.699e-5  
0.722, -6.691e-5  
0.721, -6.678e-5  
0.720, -6.663e-5  
0.719, -6.648e-5  
0.718, -6.639e-5  
0.717, -6.632e-5  
0.716, -6.619e-5  
0.715, -6.605e-5  
0.714, -6.591e-5  
0.713, -6.580e-5  
0.712, -6.572e-5  
0.711, -6.557e-5  
0.710, -6.545e-5  
0.709, -6.533e-5  
0.708, -6.523e-5  
0.707, -6.516e-5  
0.706, -6.501e-5  
0.705, -6.487e-5  
0.704, -6.471e-5  
0.703, -6.460e-5  
0.702, -6.454e-5  
0.701, -6.441e-5  
0.700, -6.426e-5  
0.699, -6.411e-5  
0.698, -6.398e-5  
0.697, -6.392e-5  
0.696, -6.377e-5  
0.695, -6.363e-5  
0.694, -6.349e-5  
0.693, -6.338e-5  
0.692, -6.331e-5  
0.691, -6.315e-5  
0.690, -6.299e-5  
0.689, -6.286e-5  
0.688, -6.275e-5  
0.687, -6.264e-5  
0.686, -6.248e-5  
0.685, -6.233e-5  
0.684, -6.218e-5

0.683, -6.205e-5  
0.682, -6.197e-5  
0.681, -6.182e-5  
0.680, -6.169e-5  
0.679, -6.154e-5  
0.678, -6.143e-5  
0.677, -6.134e-5  
0.676, -6.119e-5  
0.675, -6.103e-5  
0.674, -6.085e-5  
0.673, -6.073e-5  
0.672, -6.064e-5  
0.671, -6.048e-5  
0.670, -6.032e-5  
0.669, -6.016e-5  
0.668, -6.004e-5  
0.667, -5.993e-5  
0.666, -5.977e-5  
0.665, -5.960e-5  
0.664, -5.943e-5  
0.663, -5.928e-5  
0.662, -5.921e-5  
0.661, -5.905e-5  
0.660, -5.889e-5  
0.659, -5.872e-5  
0.658, -5.858e-5  
0.657, -5.849e-5  
0.656, -5.833e-5  
0.655, -5.815e-5  
0.654, -5.800e-5  
0.653, -5.788e-5  
0.652, -5.778e-5  
0.651, -5.762e-5  
0.650, -5.745e-5  
0.649, -5.728e-5  
0.648, -5.715e-5  
0.647, -5.705e-5  
0.646, -5.689e-5  
0.645, -5.673e-5  
0.644, -5.656e-5  
0.643, -5.644e-5  
0.642, -5.634e-5  
0.641, -5.617e-5  
0.640, -5.601e-5  
0.639, -5.583e-5  
0.638, -5.570e-5  
0.637, -5.561e-5  
0.636, -5.545e-5  
0.635, -5.529e-5  
0.634, -5.513e-5

0.633, -5.499e-5  
0.632, -5.492e-5  
0.631, -5.475e-5  
0.630, -5.459e-5  
0.629, -5.443e-5  
0.628, -5.430e-5  
0.627, -5.420e-5  
0.626, -5.404e-5  
0.625, -5.389e-5  
0.624, -5.373e-5  
0.623, -5.362e-5  
0.622, -5.352e-5  
0.621, -5.337e-5  
0.620, -5.322e-5  
0.619, -5.307e-5  
0.618, -5.295e-5  
0.617, -5.286e-5  
0.616, -5.270e-5  
0.615, -5.252e-5  
0.614, -5.238e-5  
0.613, -5.229e-5  
0.612, -5.220e-5  
0.611, -5.208e-5  
0.610, -5.194e-5  
0.609, -5.179e-5  
0.608, -5.169e-5  
0.607, -5.160e-5  
0.606, -5.145e-5  
0.605, -5.132e-5  
0.604, -5.116e-5  
0.603, -5.105e-5  
0.602, -5.098e-5  
0.601, -5.085e-5  
0.600, -5.072e-5  
0.599, -5.057e-5  
0.598, -5.046e-5  
0.597, -5.039e-5  
0.596, -5.027e-5  
0.595, -5.014e-5  
0.594, -5.001e-5  
0.593, -4.992e-5  
0.592, -4.984e-5  
0.591, -4.971e-5  
0.590, -4.960e-5  
0.589, -4.946e-5  
0.588, -4.937e-5  
0.587, -4.932e-5  
0.586, -4.918e-5  
0.585, -4.906e-5  
0.584, -4.893e-5

0.583, -4.883e-5  
0.582, -4.876e-5  
0.581, -4.864e-5  
0.580, -4.851e-5  
0.579, -4.837e-5  
0.578, -4.827e-5  
0.577, -4.821e-5  
0.576, -4.808e-5  
0.575, -4.794e-5  
0.574, -4.780e-5  
0.573, -4.769e-5  
0.572, -4.762e-5  
0.571, -4.750e-5  
0.570, -4.735e-5  
0.569, -4.720e-5  
0.568, -4.709e-5  
0.567, -4.703e-5  
0.566, -4.689e-5  
0.565, -4.676e-5  
0.564, -4.661e-5  
0.563, -4.648e-5  
0.562, -4.640e-5  
0.561, -4.625e-5  
0.560, -4.609e-5  
0.559, -4.594e-5  
0.558, -4.583e-5  
0.557, -4.575e-5  
0.556, -4.559e-5  
0.555, -4.545e-5  
0.554, -4.530e-5  
0.553, -4.518e-5  
0.552, -4.509e-5  
0.551, -4.492e-5  
0.550, -4.475e-5  
0.549, -4.457e-5  
0.548, -4.445e-5  
0.547, -4.434e-5  
0.546, -4.417e-5  
0.545, -4.401e-5  
0.544, -4.383e-5  
0.543, -4.367e-5  
0.542, -4.358e-5  
0.541, -4.341e-5  
0.540, -4.323e-5  
0.539, -4.304e-5  
0.538, -4.289e-5  
0.537, -4.276e-5  
0.536, -4.256e-5  
0.535, -4.234e-5  
0.534, -4.213e-5



0.533, -4.197e-5  
0.532, -4.183e-5  
0.531, -4.161e-5  
0.530, -4.140e-5  
0.529, -4.121e-5  
0.528, -4.103e-5  
0.527, -4.089e-5  
0.526, -4.068e-5  
0.525, -4.045e-5  
0.524, -4.021e-5  
0.523, -4.003e-5  
0.522, -3.988e-5  
0.521, -3.963e-5  
0.520, -3.939e-5  
0.519, -3.914e-5  
0.518, -3.894e-5  
0.517, -3.879e-5  
0.516, -3.854e-5  
0.515, -3.830e-5  
0.514, -3.806e-5  
0.513, -3.786e-5  
0.512, -3.768e-5  
0.511, -3.740e-5  
0.510, -3.713e-5  
0.509, -3.684e-5  
0.508, -3.660e-5  
0.507, -3.644e-5  
0.506, -3.611e-5  
0.505, -3.582e-5  
0.504, -3.554e-5  
0.503, -3.529e-5  
0.502, -3.508e-5  
0.501, -3.476e-5  
0.500, -3.445e-5  
0.499, -3.412e-5  
0.498, -3.387e-5  
0.497, -3.367e-5  
0.496, -3.335e-5  
0.495, -3.302e-5  
0.494, -3.270e-5  
0.493, -3.244e-5  
0.492, -3.219e-5  
0.491, -3.184e-5  
0.490, -3.149e-5  
0.489, -3.114e-5  
0.488, -3.086e-5  
0.487, -3.063e-5  
0.486, -3.025e-5  
0.485, -2.989e-5  
0.484, -2.953e-5

0.483, -2.926e-5  
0.482, -2.902e-5  
0.481, -2.866e-5  
0.480, -2.829e-5  
0.479, -2.791e-5  
0.478, -2.765e-5  
0.477, -2.741e-5  
0.476, -2.701e-5  
0.475, -2.667e-5  
0.474, -2.629e-5  
0.473, -2.600e-5  
0.472, -2.576e-5  
0.471, -2.537e-5  
0.470, -2.501e-5  
0.469, -2.462e-5  
0.468, -2.433e-5  
0.467, -2.409e-5  
0.466, -2.369e-5  
0.465, -2.335e-5  
0.464, -2.302e-5  
0.463, -2.272e-5  
0.462, -2.249e-5  
0.461, -2.210e-5  
0.460, -2.177e-5  
0.459, -2.143e-5  
0.458, -2.120e-5  
0.457, -2.096e-5  
0.456, -2.059e-5  
0.455, -2.025e-5  
0.454, -1.992e-5  
0.453, -1.965e-5  
0.452, -1.944e-5  
0.451, -1.910e-5  
0.450, -1.879e-5  
0.449, -1.848e-5  
0.448, -1.825e-5  
0.447, -1.802e-5  
0.446, -1.770e-5  
0.445, -1.740e-5  
0.444, -1.711e-5  
0.443, -1.691e-5  
0.442, -1.670e-5  
0.441, -1.640e-5  
0.440, -1.612e-5  
0.439, -1.582e-5  
0.438, -1.565e-5  
0.437, -1.547e-5  
0.436, -1.518e-5  
0.435, -1.493e-5  
0.434, -1.466e-5

0.433, -1.447e-5  
0.432, -1.430e-5  
0.431, -1.402e-5  
0.430, -1.381e-5  
0.429, -1.357e-5  
0.428, -1.341e-5  
0.427, -1.325e-5  
0.426, -1.299e-5  
0.425, -1.276e-5  
0.424, -1.253e-5  
0.423, -1.237e-5  
0.422, -1.222e-5  
0.421, -1.198e-5  
0.420, -1.177e-5  
0.419, -1.156e-5  
0.418, -1.142e-5  
0.417, -1.127e-5  
0.416, -1.104e-5  
0.415, -1.087e-5  
0.414, -1.068e-5  
0.413, -1.051e-5  
0.412, -1.038e-5  
0.411, -1.016e-5  
0.410, -9.985e-6  
0.409, -9.777e-6  
0.408, -9.667e-6  
0.407, -9.518e-6  
0.406, -9.319e-6  
0.405, -9.167e-6  
0.404, -9.002e-6  
0.403, -8.862e-6  
0.402, -8.723e-6  
0.401, -8.530e-6  
0.400, -8.375e-6  
0.399, -8.202e-6  
0.398, -8.099e-6  
0.397, -7.970e-6  
0.396, -7.765e-6  
0.395, -7.631e-6  
0.394, -7.483e-6  
0.393, -7.353e-6  
0.392, -7.255e-6  
0.391, -7.089e-6  
0.390, -6.945e-6  
0.389, -6.787e-6  
0.388, -6.668e-6  
0.387, -6.578e-6  
0.386, -6.405e-6  
0.385, -6.263e-6  
0.384, -6.133e-6

0.383, -6.017e-6  
0.382, -5.931e-6  
0.381, -5.774e-6  
0.380, -5.642e-6  
0.379, -5.521e-6  
0.378, -5.414e-6  
0.377, -5.315e-6  
0.376, -5.182e-6  
0.375, -5.036e-6  
0.374, -4.886e-6  
0.373, -4.815e-6  
0.372, -4.730e-6  
0.371, -4.604e-6  
0.370, -4.448e-6  
0.369, -4.331e-6  
0.368, -4.268e-6  
0.367, -4.173e-6  
0.366, -4.042e-6  
0.365, -3.935e-6  
0.364, -3.800e-6  
0.363, -3.733e-6  
0.362, -3.670e-6  
0.361, -3.547e-6  
0.360, -3.456e-6  
0.359, -3.344e-6  
0.358, -3.256e-6  
0.357, -3.184e-6  
0.356, -3.067e-6  
0.355, -2.964e-6  
0.354, -2.837e-6  
0.353, -2.774e-6  
0.352, -2.701e-6  
0.351, -2.606e-6  
0.350, -2.523e-6  
0.349, -2.412e-6  
0.348, -2.339e-6  
0.347, -2.279e-6  
0.346, -2.158e-6  
0.345, -2.066e-6  
0.344, -1.987e-6  
0.343, -1.939e-6  
0.342, -1.871e-6  
0.341, -1.754e-6  
0.340, -1.666e-6  
0.339, -1.577e-6  
0.338, -1.530e-6  
0.337, -1.493e-6  
0.336, -1.401e-6  
0.335, -1.328e-6  
0.334, -1.231e-6

0.333, -1.187e-6  
0.332, -1.106e-6  
0.331, -1.027e-6  
0.330, -9.594e-7  
0.329, -8.857e-7  
0.328, -8.445e-7  
0.327, -7.875e-7  
0.326, -7.050e-7  
0.325, -6.077e-7  
0.324, -5.213e-7  
0.323, -4.859e-7  
0.322, -4.574e-7  
0.321, -3.759e-7  
0.320, -3.150e-7  
0.319, -2.531e-7  
0.318, -2.089e-7  
0.317, -1.558e-7  
0.316, -8.115e-8  
0.315, -1.533e-8  
0.314, 7.113e-8  
0.313, 1.222e-7  
0.312, 1.635e-7  
0.311, 2.450e-7  
0.310, 2.853e-7  
0.309, 3.511e-7  
0.308, 3.825e-7  
0.307, 4.277e-7  
0.306, 5.083e-7  
0.305, 5.682e-7  
0.304, 6.360e-7  
0.303, 6.724e-7  
0.302, 7.087e-7  
0.301, 7.952e-7  
0.300, 8.561e-7  
0.299, 9.101e-7  
0.298, 9.661e-7  
0.297, 1.000e-6  
0.296, 1.068e-6  
0.295, 1.132e-6  
0.294, 1.180e-6  
0.293, 1.212e-6  
0.292, 1.259e-6  
0.291, 1.347e-6  
0.290, 1.391e-6  
0.289, 1.445e-6  
0.288, 1.468e-6  
0.287, 1.497e-6  
0.286, 1.577e-6  
0.285, 1.631e-6  
0.284, 1.695e-6

0.283, 1.715e-6  
0.282, 1.778e-6  
0.281, 1.849e-6  
0.280, 1.884e-6  
0.279, 1.948e-6  
0.278, 1.994e-6  
0.277, 2.036e-6  
0.276, 2.089e-6  
0.275, 2.118e-6  
0.274, 2.187e-6  
0.273, 2.231e-6  
0.272, 2.259e-6  
0.271, 2.324e-6  
0.270, 2.372e-6  
0.269, 2.451e-6  
0.268, 2.482e-6  
0.267, 2.517e-6  
0.266, 2.570e-6  
0.265, 2.621e-6  
0.264, 2.687e-6  
0.263, 2.720e-6  
0.262, 2.745e-6  
0.261, 2.816e-6  
0.260, 2.874e-6  
0.259, 2.930e-6  
0.258, 2.967e-6  
0.257, 3.005e-6  
0.256, 3.076e-6  
0.255, 3.133e-6  
0.254, 3.184e-6  
0.253, 3.213e-6  
0.252, 3.261e-6  
0.251, 3.333e-6  
0.250, 3.389e-6  
0.249, 3.447e-6  
0.248, 3.471e-6  
0.247, 3.519e-6  
0.246, 3.590e-6  
0.245, 3.634e-6  
0.244, 3.695e-6  
0.243, 3.722e-6  
0.242, 3.767e-6  
0.241, 3.842e-6  
0.240, 3.903e-6  
0.239, 3.963e-6  
0.238, 3.990e-6  
0.237, 4.035e-6  
0.236, 4.118e-6  
0.235, 4.171e-6  
0.234, 4.243e-6

0.233, 4.260e-6  
0.232, 4.302e-6  
0.231, 4.377e-6  
0.230, 4.438e-6  
0.229, 4.486e-6  
0.228, 4.527e-6  
0.227, 4.563e-6  
0.226, 4.646e-6  
0.225, 4.693e-6  
0.224, 4.755e-6  
0.223, 4.791e-6  
0.222, 4.844e-6  
0.221, 4.925e-6  
0.220, 4.974e-6  
0.219, 5.027e-6  
0.218, 5.071e-6  
0.217, 5.116e-6  
0.216, 5.211e-6  
0.215, 5.250e-6  
0.214, 5.310e-6  
0.213, 5.348e-6  
0.212, 5.417e-6  
0.211, 5.501e-6  
0.210, 5.586e-6  
0.209, 5.636e-6  
0.208, 5.651e-6  
0.207, 5.699e-6  
0.206, 5.766e-6  
0.205, 5.848e-6  
0.204, 5.915e-6  
0.203, 5.951e-6  
0.202, 6.001e-6  
0.201, 6.085e-6  
0.200, 6.146e-6  
0.199, 6.229e-6  
0.198, 6.276e-6  
0.197, 6.301e-6  
0.196, 6.386e-6  
0.195, 6.447e-6  
0.194, 6.509e-6  
0.193, 6.552e-6  
0.192, 6.629e-6  
0.191, 6.716e-6  
0.190, 6.787e-6  
0.189, 6.843e-6  
0.188, 6.886e-6  
0.187, 6.931e-6  
0.186, 7.024e-6  
0.185, 7.092e-6  
0.184, 7.157e-6

0.183, 7.207e-6  
0.182, 7.281e-6  
0.181, 7.370e-6  
0.180, 7.464e-6  
0.179, 7.547e-6  
0.178, 7.584e-6  
0.177, 7.650e-6  
0.176, 7.754e-6  
0.175, 7.852e-6  
0.174, 7.917e-6  
0.173, 7.995e-6  
0.172, 8.075e-6  
0.171, 8.185e-6  
0.170, 8.262e-6  
0.169, 8.334e-6  
0.168, 8.391e-6  
0.167, 8.471e-6  
0.166, 8.598e-6  
0.165, 8.703e-6  
0.164, 8.807e-6  
0.163, 8.858e-6  
0.162, 8.933e-6  
0.161, 9.053e-6  
0.160, 9.152e-6  
0.159, 9.266e-6  
0.158, 9.339e-6  
0.157, 9.457e-6  
0.156, 9.610e-6  
0.155, 9.701e-6  
0.154, 9.816e-6  
0.153, 9.910e-6  
0.152, 9.997e-6  
0.151, 1.017e-5  
0.150, 1.027e-5  
0.149, 1.039e-5  
0.148, 1.049e-5  
0.147, 1.059e-5  
0.146, 1.075e-5  
0.145, 1.090e-5  
0.144, 1.104e-5  
0.143, 1.115e-5  
0.142, 1.130e-5  
0.141, 1.148e-5  
0.140, 1.163e-5  
0.139, 1.176e-5  
0.138, 1.188e-5  
0.137, 1.203e-5  
0.136, 1.224e-5  
0.135, 1.240e-5  
0.134, 1.255e-5



0.133, 1.269e-5  
0.132, 1.286e-5  
0.131, 1.307e-5  
0.130, 1.327e-5  
0.129, 1.345e-5  
0.128, 1.359e-5  
0.127, 1.376e-5  
0.126, 1.398e-5  
0.125, 1.418e-5  
0.124, 1.440e-5  
0.123, 1.454e-5  
0.122, 1.473e-5  
0.121, 1.498e-5  
0.120, 1.520e-5  
0.119, 1.543e-5  
0.118, 1.563e-5  
0.117, 1.585e-5  
0.116, 1.609e-5  
0.115, 1.632e-5  
0.114, 1.657e-5  
0.113, 1.674e-5  
0.112, 1.696e-5  
0.111, 1.724e-5  
0.110, 1.748e-5  
0.109, 1.773e-5  
0.108, 1.795e-5  
0.107, 1.817e-5  
0.106, 1.849e-5  
0.105, 1.876e-5  
0.104, 1.899e-5  
0.103, 1.921e-5  
0.102, 1.946e-5  
0.101, 1.978e-5  
0.100, 2.006e-5  
0.099, 2.030e-5  
0.098, 2.052e-5  
0.097, 2.078e-5  
0.096, 2.106e-5  
0.095, 2.134e-5  
0.094, 2.160e-5  
0.093, 2.180e-5  
0.092, 2.203e-5  
0.091, 2.231e-5  
0.090, 2.258e-5  
0.089, 2.284e-5  
0.088, 2.305e-5  
0.087, 2.331e-5  
0.086, 2.363e-5  
0.085, 2.391e-5  
0.084, 2.417e-5

0.083, 2.438e-5  
0.082, 2.463e-5  
0.081, 2.495e-5  
0.080, 2.520e-5  
0.079, 2.548e-5  
0.078, 2.567e-5  
0.077, 2.589e-5  
0.076, 2.618e-5  
0.075, 2.642e-5  
0.074, 2.667e-5  
0.073, 2.686e-5  
0.072, 2.709e-5  
0.071, 2.739e-5  
0.070, 2.763e-5  
0.069, 2.786e-5  
0.068, 2.806e-5  
0.067, 2.827e-5  
0.066, 2.855e-5  
0.065, 2.878e-5  
0.064, 2.899e-5  
0.063, 2.917e-5  
0.062, 2.937e-5  
0.061, 2.962e-5  
0.060, 2.986e-5  
0.059, 3.005e-5  
0.058, 3.022e-5  
0.057, 3.040e-5  
0.056, 3.064e-5  
0.055, 3.085e-5  
0.054, 3.103e-5  
0.053, 3.117e-5  
0.052, 3.135e-5  
0.051, 3.157e-5  
0.050, 3.176e-5  
0.049, 3.195e-5  
0.048, 3.208e-5  
0.047, 3.230e-5  
0.046, 3.250e-5  
0.045, 3.266e-5  
0.044, 3.283e-5  
0.043, 3.294e-5  
0.042, 3.312e-5  
0.041, 3.332e-5  
0.040, 3.347e-5  
0.039, 3.363e-5  
0.038, 3.374e-5  
0.037, 3.389e-5  
0.036, 3.410e-5  
0.035, 3.425e-5  
0.034, 3.440e-5

0.033, 3.452e-5  
0.032, 3.466e-5  
0.031, 3.487e-5  
0.030, 3.502e-5  
0.029, 3.514e-5  
0.028, 3.525e-5  
0.027, 3.538e-5  
0.026, 3.554e-5  
0.025, 3.567e-5  
0.024, 3.579e-5  
0.023, 3.589e-5  
0.022, 3.602e-5  
0.021, 3.619e-5  
0.020, 3.635e-5  
0.019, 3.647e-5  
0.018, 3.656e-5  
0.017, 3.670e-5  
0.016, 3.685e-5  
0.015, 3.699e-5  
0.014, 3.711e-5  
0.013, 3.721e-5  
0.012, 3.735e-5  
0.011, 3.750e-5  
0.010, 3.763e-5  
0.009, 3.775e-5  
0.008, 3.783e-5  
0.007, 3.796e-5  
0.006, 3.812e-5  
0.005, 3.825e-5  
0.004, 3.837e-5  
0.003, 3.845e-5  
0.002, 3.857e-5  
0.001, 3.872e-5  
0.000, 3.888e-5  
-0.001, 3.899e-5  
-0.002, 3.908e-5  
-0.003, 3.923e-5  
-0.004, 3.936e-5  
-0.005, 3.947e-5  
-0.006, 3.959e-5  
-0.007, 3.970e-5  
-0.008, 3.981e-5  
-0.009, 3.995e-5  
-0.010, 4.006e-5  
-0.011, 4.017e-5  
-0.012, 4.028e-5  
-0.013, 4.039e-5  
-0.014, 4.054e-5  
-0.015, 4.067e-5  
-0.016, 4.076e-5

-0.017, 4.086e-5  
-0.018, 4.097e-5  
-0.019, 4.111e-5  
-0.020, 4.125e-5  
-0.021, 4.136e-5  
-0.022, 4.146e-5  
-0.023, 4.157e-5  
-0.024, 4.171e-5  
-0.025, 4.183e-5  
-0.026, 4.192e-5  
-0.027, 4.201e-5  
-0.028, 4.213e-5  
-0.029, 4.228e-5  
-0.030, 4.242e-5  
-0.031, 4.253e-5  
-0.032, 4.262e-5  
-0.033, 4.274e-5  
-0.034, 4.286e-5  
-0.035, 4.299e-5  
-0.036, 4.307e-5  
-0.037, 4.319e-5  
-0.038, 4.330e-5  
-0.039, 4.342e-5  
-0.040, 4.354e-5  
-0.041, 4.364e-5  
-0.042, 4.372e-5  
-0.043, 4.386e-5  
-0.044, 4.401e-5  
-0.045, 4.412e-5  
-0.046, 4.424e-5  
-0.047, 4.434e-5  
-0.048, 4.446e-5  
-0.049, 4.461e-5  
-0.050, 4.476e-5  
-0.051, 4.487e-5  
-0.052, 4.496e-5  
-0.053, 4.508e-5  
-0.054, 4.521e-5  
-0.055, 4.533e-5  
-0.056, 4.544e-5  
-0.057, 4.562e-5  
-0.058, 4.579e-5  
-0.059, 4.593e-5  
-0.060, 4.603e-5  
-0.061, 4.613e-5  
-0.062, 4.618e-5  
-0.063, 4.630e-5  
-0.064, 4.641e-5  
-0.065, 4.656e-5  
-0.066, 4.669e-5

-0.067, 4.676e-5  
-0.068, 4.690e-5  
-0.069, 4.702e-5  
-0.070, 4.714e-5  
-0.071, 4.726e-5  
-0.072, 4.738e-5  
-0.073, 4.749e-5  
-0.074, 4.762e-5  
-0.075, 4.774e-5  
-0.076, 4.784e-5  
-0.077, 4.794e-5  
-0.078, 4.807e-5  
-0.079, 4.819e-5  
-0.080, 4.832e-5  
-0.081, 4.844e-5  
-0.082, 4.854e-5  
-0.083, 4.868e-5  
-0.084, 4.886e-5  
-0.085, 4.898e-5  
-0.086, 4.908e-5  
-0.087, 4.919e-5  
-0.088, 4.930e-5  
-0.089, 4.945e-5  
-0.090, 4.959e-5  
-0.091, 4.970e-5  
-0.092, 4.984e-5  
-0.093, 4.996e-5  
-0.094, 5.010e-5  
-0.095, 5.023e-5  
-0.096, 5.034e-5  
-0.097, 5.047e-5  
-0.098, 5.059e-5  
-0.099, 5.073e-5  
-0.100, 5.089e-5  
-0.101, 5.098e-5  
-0.102, 5.112e-5  
-0.103, 5.125e-5  
-0.104, 5.138e-5  
-0.105, 5.151e-5  
-0.106, 5.163e-5  
-0.107, 5.176e-5  
-0.108, 5.189e-5  
-0.109, 5.202e-5  
-0.110, 5.216e-5  
-0.111, 5.227e-5  
-0.112, 5.238e-5  
-0.113, 5.253e-5  
-0.114, 5.269e-5  
-0.115, 5.283e-5  
-0.116, 5.296e-5

-0.117, 5.306e-5  
-0.118, 5.320e-5  
-0.119, 5.333e-5  
-0.120, 5.348e-5  
-0.121, 5.360e-5  
-0.122, 5.371e-5  
-0.123, 5.384e-5  
-0.124, 5.397e-5  
-0.125, 5.412e-5  
-0.126, 5.423e-5  
-0.127, 5.435e-5  
-0.128, 5.450e-5  
-0.129, 5.463e-5  
-0.130, 5.476e-5  
-0.131, 5.489e-5  
-0.132, 5.502e-5  
-0.133, 5.518e-5  
-0.134, 5.534e-5  
-0.135, 5.546e-5  
-0.136, 5.556e-5  
-0.137, 5.569e-5  
-0.138, 5.585e-5  
-0.139, 5.599e-5  
-0.140, 5.613e-5  
-0.141, 5.623e-5  
-0.142, 5.633e-5  
-0.143, 5.648e-5  
-0.144, 5.664e-5  
-0.145, 5.677e-5  
-0.146, 5.688e-5  
-0.147, 5.701e-5  
-0.148, 5.717e-5  
-0.149, 5.732e-5  
-0.150, 5.746e-5  
-0.151, 5.757e-5  
-0.152, 5.769e-5  
-0.153, 5.785e-5  
-0.154, 5.799e-5  
-0.155, 5.812e-5  
-0.156, 5.824e-5  
-0.157, 5.838e-5  
-0.158, 5.852e-5  
-0.159, 5.868e-5  
-0.160, 5.882e-5  
-0.161, 5.894e-5  
-0.162, 5.906e-5  
-0.163, 5.922e-5  
-0.164, 5.939e-5  
-0.165, 5.956e-5  
-0.166, 5.967e-5

-0.167, 5.980e-5  
-0.168, 5.994e-5  
-0.169, 6.010e-5  
-0.170, 6.025e-5  
-0.171, 6.037e-5  
-0.172, 6.050e-5  
-0.173, 6.065e-5  
-0.174, 6.082e-5  
-0.175, 6.097e-5  
-0.176, 6.107e-5  
-0.177, 6.122e-5  
-0.178, 6.137e-5  
-0.179, 6.152e-5  
-0.180, 6.167e-5  
-0.181, 6.178e-5  
-0.182, 6.194e-5  
-0.183, 6.211e-5  
-0.184, 6.229e-5  
-0.185, 6.245e-5  
-0.186, 6.260e-5  
-0.187, 6.275e-5  
-0.188, 6.294e-5  
-0.189, 6.312e-5  
-0.190, 6.328e-5  
-0.191, 6.341e-5  
-0.192, 6.355e-5  
-0.193, 6.374e-5  
-0.194, 6.392e-5  
-0.195, 6.409e-5  
-0.196, 6.424e-5  
-0.197, 6.440e-5  
-0.198, 6.463e-5  
-0.199, 6.481e-5  
-0.200, 6.499e-5  
-0.201, 6.513e-5  
-0.202, 6.530e-5  
-0.203, 6.551e-5  
-0.204, 6.571e-5  
-0.205, 6.590e-5  
-0.206, 6.605e-5  
-0.207, 6.620e-5  
-0.208, 6.639e-5  
-0.209, 6.659e-5  
-0.210, 6.677e-5  
-0.211, 6.690e-5  
-0.212, 6.706e-5  
-0.213, 6.728e-5  
-0.214, 6.748e-5  
-0.215, 6.766e-5  
-0.216, 6.780e-5

-0.217, 6.798e-5  
-0.218, 6.814e-5  
-0.219, 6.833e-5  
-0.220, 6.851e-5  
-0.221, 6.864e-5  
-0.222, 6.879e-5  
-0.223, 6.895e-5  
-0.224, 6.916e-5  
-0.225, 6.933e-5  
-0.226, 6.945e-5  
-0.227, 6.960e-5  
-0.228, 6.977e-5  
-0.229, 6.997e-5  
-0.230, 7.019e-5  
-0.231, 7.031e-5  
-0.232, 7.049e-5  
-0.233, 7.066e-5  
-0.234, 7.082e-5  
-0.235, 7.098e-5  
-0.236, 7.114e-5  
-0.237, 7.129e-5  
-0.238, 7.146e-5  
-0.239, 7.164e-5  
-0.240, 7.180e-5  
-0.241, 7.192e-5  
-0.242, 7.209e-5  
-0.243, 7.227e-5  
-0.244, 7.245e-5  
-0.245, 7.261e-5  
-0.246, 7.275e-5  
-0.247, 7.289e-5  
-0.248, 7.305e-5  
-0.249, 7.323e-5  
-0.250, 7.338e-5  
-0.251, 7.351e-5  
-0.252, 7.367e-5  
-0.253, 7.383e-5  
-0.254, 7.402e-5  
-0.255, 7.417e-5  
-0.256, 7.429e-5  
-0.257, 7.442e-5  
-0.258, 7.457e-5  
-0.259, 7.474e-5  
-0.260, 7.490e-5  
-0.261, 7.498e-5  
-0.262, 7.509e-5  
-0.263, 7.524e-5  
-0.264, 7.538e-5  
-0.265, 7.551e-5  
-0.266, 7.559e-5



-0.267, 7.572e-5  
-0.268, 7.587e-5  
-0.269, 7.599e-5  
-0.270, 7.611e-5  
-0.271, 7.620e-5  
-0.272, 7.630e-5  
-0.273, 7.644e-5  
-0.274, 7.658e-5  
-0.275, 7.669e-5  
-0.276, 7.675e-5  
-0.277, 7.684e-5  
-0.278, 7.699e-5  
-0.279, 7.708e-5  
-0.280, 7.718e-5  
-0.281, 7.725e-5  
-0.282, 7.735e-5  
-0.283, 7.746e-5  
-0.284, 7.756e-5  
-0.285, 7.764e-5  
-0.286, 7.771e-5  
-0.287, 7.780e-5  
-0.288, 7.789e-5  
-0.289, 7.798e-5  
-0.290, 7.807e-5  
-0.291, 7.814e-5  
-0.292, 7.823e-5  
-0.293, 7.830e-5  
-0.294, 7.840e-5  
-0.295, 7.848e-5  
-0.296, 7.853e-5  
-0.297, 7.861e-5  
-0.298, 7.870e-5  
-0.299, 7.876e-5  
-0.300, 7.884e-5  
-0.301, 7.888e-5  
-0.302, 7.896e-5  
-0.303, 7.905e-5  
-0.304, 7.912e-5  
-0.305, 7.918e-5  
-0.306, 7.921e-5  
-0.307, 7.927e-5  
-0.308, 7.936e-5  
-0.309, 7.943e-5  
-0.310, 7.952e-5  
-0.311, 7.953e-5  
-0.312, 7.958e-5  
-0.313, 7.964e-5  
-0.314, 7.971e-5  
-0.315, 7.978e-5  
-0.316, 7.980e-5

-0.317, 7.985e-5  
-0.318, 7.993e-5  
-0.319, 7.999e-5  
-0.320, 8.006e-5  
-0.321, 8.009e-5  
-0.322, 8.014e-5  
-0.323, 8.021e-5  
-0.324, 8.026e-5  
-0.325, 8.030e-5  
-0.326, 8.033e-5  
-0.327, 8.038e-5  
-0.328, 8.044e-5  
-0.329, 8.050e-5  
-0.330, 8.054e-5  
-0.331, 8.055e-5  
-0.332, 8.061e-5  
-0.333, 8.068e-5  
-0.334, 8.073e-5  
-0.335, 8.077e-5  
-0.336, 8.077e-5  
-0.337, 8.082e-5  
-0.338, 8.088e-5  
-0.339, 8.092e-5  
-0.340, 8.095e-5  
-0.341, 8.096e-5  
-0.342, 8.103e-5  
-0.343, 8.108e-5  
-0.344, 8.111e-5  
-0.345, 8.116e-5  
-0.346, 8.118e-5  
-0.347, 8.123e-5  
-0.348, 8.125e-5  
-0.349, 8.128e-5  
-0.350, 8.132e-5  
-0.351, 8.131e-5  
-0.352, 8.136e-5  
-0.353, 8.140e-5  
-0.354, 8.144e-5  
-0.355, 8.147e-5  
-0.356, 8.148e-5  
-0.357, 8.150e-5  
-0.358, 8.157e-5  
-0.359, 8.160e-5  
-0.360, 8.166e-5  
-0.361, 8.168e-5  
-0.362, 8.168e-5  
-0.363, 8.173e-5  
-0.364, 8.177e-5  
-0.365, 8.178e-5  
-0.366, 8.176e-5

-0.367, 8.180e-5  
-0.368, 8.183e-5  
-0.369, 8.186e-5  
-0.370, 8.188e-5  
-0.371, 8.188e-5  
-0.372, 8.191e-5  
-0.373, 8.195e-5  
-0.374, 8.198e-5  
-0.375, 8.201e-5  
-0.376, 8.199e-5  
-0.377, 8.202e-5  
-0.378, 8.205e-5  
-0.379, 8.205e-5  
-0.380, 8.208e-5  
-0.381, 8.206e-5  
-0.382, 8.208e-5  
-0.383, 8.213e-5  
-0.384, 8.213e-5  
-0.385, 8.217e-5  
-0.386, 8.214e-5  
-0.387, 8.217e-5  
-0.388, 8.220e-5  
-0.389, 8.221e-5  
-0.390, 8.222e-5  
-0.391, 8.220e-5  
-0.392, 8.222e-5  
-0.393, 8.224e-5  
-0.394, 8.224e-5  
-0.395, 8.225e-5  
-0.396, 8.222e-5  
-0.397, 8.223e-5  
-0.398, 8.226e-5  
-0.399, 8.227e-5

Mar. 30, 2021 03:58:02

Linear Sweep Voltammetry

File: c:\users\shadji04\desktop\sofia cv\30032021\complex 6 sweep experiment under n2\500 rpm\_25 mv rate.txt

Data Source: Experiment

Instrument Model: CHI650E

Header:

Note: 500 rpm

Init E (V) = 0.8

Final E (V) = -0.4

Scan Rate (V/s) = 0.025

Sample Interval (V) = 0.001

Quiet Time (sec) = 2

Sensitivity (A/V) = 0.001

Potential/V, Current/A

0.800, -9.555e-5

0.799, -9.513e-5

0.798, -9.486e-5  
0.797, -9.457e-5  
0.796, -9.430e-5  
0.795, -9.411e-5  
0.794, -9.387e-5  
0.793, -9.366e-5  
0.792, -9.346e-5  
0.791, -9.324e-5  
0.790, -9.305e-5  
0.789, -9.288e-5  
0.788, -9.270e-5  
0.787, -9.249e-5  
0.786, -9.234e-5  
0.785, -9.217e-5  
0.784, -9.200e-5  
0.783, -9.184e-5  
0.782, -9.167e-5  
0.781, -9.149e-5  
0.780, -9.131e-5  
0.779, -9.115e-5  
0.778, -9.098e-5  
0.777, -9.083e-5  
0.776, -9.064e-5  
0.775, -9.045e-5  
0.774, -9.029e-5  
0.773, -9.010e-5  
0.772, -8.995e-5  
0.771, -8.981e-5  
0.770, -8.963e-5  
0.769, -8.946e-5  
0.768, -8.931e-5  
0.767, -8.914e-5  
0.766, -8.898e-5  
0.765, -8.884e-5  
0.764, -8.866e-5  
0.763, -8.851e-5  
0.762, -8.835e-5  
0.761, -8.817e-5  
0.760, -8.802e-5  
0.759, -8.788e-5  
0.758, -8.769e-5  
0.757, -8.754e-5  
0.756, -8.739e-5  
0.755, -8.721e-5  
0.754, -8.705e-5  
0.753, -8.689e-5  
0.752, -8.672e-5  
0.751, -8.657e-5  
0.750, -8.640e-5  
0.749, -8.621e-5

0.748, -8.605e-5  
0.747, -8.591e-5  
0.746, -8.574e-5  
0.745, -8.558e-5  
0.744, -8.545e-5  
0.743, -8.528e-5  
0.742, -8.513e-5  
0.741, -8.498e-5  
0.740, -8.482e-5  
0.739, -8.469e-5  
0.738, -8.457e-5  
0.737, -8.441e-5  
0.736, -8.427e-5  
0.735, -8.415e-5  
0.734, -8.399e-5  
0.733, -8.385e-5  
0.732, -8.372e-5  
0.731, -8.354e-5  
0.730, -8.337e-5  
0.729, -8.325e-5  
0.728, -8.309e-5  
0.727, -8.293e-5  
0.726, -8.281e-5  
0.725, -8.264e-5  
0.724, -8.248e-5  
0.723, -8.238e-5  
0.722, -8.224e-5  
0.721, -8.208e-5  
0.720, -8.195e-5  
0.719, -8.177e-5  
0.718, -8.158e-5  
0.717, -8.145e-5  
0.716, -8.128e-5  
0.715, -8.110e-5  
0.714, -8.097e-5  
0.713, -8.079e-5  
0.712, -8.061e-5  
0.711, -8.048e-5  
0.710, -8.030e-5  
0.709, -8.014e-5  
0.708, -8.003e-5  
0.707, -7.986e-5  
0.706, -7.969e-5  
0.705, -7.954e-5  
0.704, -7.937e-5  
0.703, -7.920e-5  
0.702, -7.909e-5  
0.701, -7.892e-5  
0.700, -7.875e-5  
0.699, -7.863e-5

0.698, -7.845e-5  
0.697, -7.828e-5  
0.696, -7.815e-5  
0.695, -7.798e-5  
0.694, -7.781e-5  
0.693, -7.767e-5  
0.692, -7.748e-5  
0.691, -7.733e-5  
0.690, -7.720e-5  
0.689, -7.701e-5  
0.688, -7.680e-5  
0.687, -7.664e-5  
0.686, -7.646e-5  
0.685, -7.626e-5  
0.684, -7.612e-5  
0.683, -7.594e-5  
0.682, -7.576e-5  
0.681, -7.561e-5  
0.680, -7.545e-5  
0.679, -7.528e-5  
0.678, -7.512e-5  
0.677, -7.496e-5  
0.676, -7.480e-5  
0.675, -7.466e-5  
0.674, -7.450e-5  
0.673, -7.430e-5  
0.672, -7.417e-5  
0.671, -7.399e-5  
0.670, -7.384e-5  
0.669, -7.366e-5  
0.668, -7.349e-5  
0.667, -7.331e-5  
0.666, -7.314e-5  
0.665, -7.295e-5  
0.664, -7.276e-5  
0.663, -7.259e-5  
0.662, -7.242e-5  
0.661, -7.226e-5  
0.660, -7.211e-5  
0.659, -7.192e-5  
0.658, -7.174e-5  
0.657, -7.160e-5  
0.656, -7.139e-5  
0.655, -7.119e-5  
0.654, -7.104e-5  
0.653, -7.085e-5  
0.652, -7.065e-5  
0.651, -7.050e-5  
0.650, -7.033e-5  
0.649, -7.015e-5

0.648, -7.000e-5  
0.647, -6.982e-5  
0.646, -6.967e-5  
0.645, -6.956e-5  
0.644, -6.936e-5  
0.643, -6.919e-5  
0.642, -6.902e-5  
0.641, -6.884e-5  
0.640, -6.867e-5  
0.639, -6.853e-5  
0.638, -6.834e-5  
0.637, -6.815e-5  
0.636, -6.803e-5  
0.635, -6.786e-5  
0.634, -6.768e-5  
0.633, -6.756e-5  
0.632, -6.738e-5  
0.631, -6.720e-5  
0.630, -6.708e-5  
0.629, -6.690e-5  
0.628, -6.672e-5  
0.627, -6.659e-5  
0.626, -6.641e-5  
0.625, -6.623e-5  
0.624, -6.610e-5  
0.623, -6.592e-5  
0.622, -6.575e-5  
0.621, -6.564e-5  
0.620, -6.546e-5  
0.619, -6.530e-5  
0.618, -6.518e-5  
0.617, -6.503e-5  
0.616, -6.489e-5  
0.615, -6.475e-5  
0.614, -6.459e-5  
0.613, -6.443e-5  
0.612, -6.431e-5  
0.611, -6.416e-5  
0.610, -6.400e-5  
0.609, -6.388e-5  
0.608, -6.370e-5  
0.607, -6.355e-5  
0.606, -6.343e-5  
0.605, -6.326e-5  
0.604, -6.314e-5  
0.603, -6.302e-5  
0.602, -6.288e-5  
0.601, -6.272e-5  
0.600, -6.260e-5  
0.599, -6.247e-5

0.598, -6.233e-5  
0.597, -6.221e-5  
0.596, -6.206e-5  
0.595, -6.193e-5  
0.594, -6.181e-5  
0.593, -6.166e-5  
0.592, -6.153e-5  
0.591, -6.140e-5  
0.590, -6.125e-5  
0.589, -6.112e-5  
0.588, -6.101e-5  
0.587, -6.087e-5  
0.586, -6.074e-5  
0.585, -6.063e-5  
0.584, -6.047e-5  
0.583, -6.033e-5  
0.582, -6.025e-5  
0.581, -6.008e-5  
0.580, -5.994e-5  
0.579, -5.984e-5  
0.578, -5.966e-5  
0.577, -5.949e-5  
0.576, -5.941e-5  
0.575, -5.926e-5  
0.574, -5.914e-5  
0.573, -5.903e-5  
0.572, -5.888e-5  
0.571, -5.872e-5  
0.570, -5.861e-5  
0.569, -5.843e-5  
0.568, -5.828e-5  
0.567, -5.816e-5  
0.566, -5.800e-5  
0.565, -5.785e-5  
0.564, -5.773e-5  
0.563, -5.757e-5  
0.562, -5.741e-5  
0.561, -5.728e-5  
0.560, -5.713e-5  
0.559, -5.697e-5  
0.558, -5.686e-5  
0.557, -5.669e-5  
0.556, -5.653e-5  
0.555, -5.643e-5  
0.554, -5.625e-5  
0.553, -5.607e-5  
0.552, -5.593e-5  
0.551, -5.573e-5  
0.550, -5.556e-5  
0.549, -5.544e-5



0.548, -5.523e-5  
0.547, -5.505e-5  
0.546, -5.491e-5  
0.545, -5.471e-5  
0.544, -5.451e-5  
0.543, -5.435e-5  
0.542, -5.413e-5  
0.541, -5.392e-5  
0.540, -5.374e-5  
0.539, -5.355e-5  
0.538, -5.335e-5  
0.537, -5.317e-5  
0.536, -5.296e-5  
0.535, -5.275e-5  
0.534, -5.257e-5  
0.533, -5.233e-5  
0.532, -5.211e-5  
0.531, -5.193e-5  
0.530, -5.169e-5  
0.529, -5.145e-5  
0.528, -5.126e-5  
0.527, -5.101e-5  
0.526, -5.076e-5  
0.525, -5.056e-5  
0.524, -5.029e-5  
0.523, -5.004e-5  
0.522, -4.981e-5  
0.521, -4.955e-5  
0.520, -4.929e-5  
0.519, -4.909e-5  
0.518, -4.881e-5  
0.517, -4.854e-5  
0.516, -4.832e-5  
0.515, -4.802e-5  
0.514, -4.771e-5  
0.513, -4.749e-5  
0.512, -4.717e-5  
0.511, -4.687e-5  
0.510, -4.665e-5  
0.509, -4.632e-5  
0.508, -4.599e-5  
0.507, -4.575e-5  
0.506, -4.540e-5  
0.505, -4.508e-5  
0.504, -4.485e-5  
0.503, -4.448e-5  
0.502, -4.415e-5  
0.501, -4.389e-5  
0.500, -4.350e-5  
0.499, -4.314e-5

0.498, -4.288e-5  
0.497, -4.248e-5  
0.496, -4.210e-5  
0.495, -4.182e-5  
0.494, -4.145e-5  
0.493, -4.106e-5  
0.492, -4.078e-5  
0.491, -4.039e-5  
0.490, -4.000e-5  
0.489, -3.971e-5  
0.488, -3.931e-5  
0.487, -3.891e-5  
0.486, -3.865e-5  
0.485, -3.827e-5  
0.484, -3.789e-5  
0.483, -3.761e-5  
0.482, -3.718e-5  
0.481, -3.677e-5  
0.480, -3.647e-5  
0.479, -3.602e-5  
0.478, -3.561e-5  
0.477, -3.528e-5  
0.476, -3.484e-5  
0.475, -3.442e-5  
0.474, -3.411e-5  
0.473, -3.366e-5  
0.472, -3.325e-5  
0.471, -3.293e-5  
0.470, -3.248e-5  
0.469, -3.202e-5  
0.468, -3.170e-5  
0.467, -3.127e-5  
0.466, -3.083e-5  
0.465, -3.051e-5  
0.464, -3.008e-5  
0.463, -2.964e-5  
0.462, -2.935e-5  
0.461, -2.890e-5  
0.460, -2.847e-5  
0.459, -2.819e-5  
0.458, -2.776e-5  
0.457, -2.735e-5  
0.456, -2.705e-5  
0.455, -2.658e-5  
0.454, -2.618e-5  
0.453, -2.592e-5  
0.452, -2.552e-5  
0.451, -2.513e-5  
0.450, -2.485e-5  
0.449, -2.442e-5

0.448, -2.403e-5  
0.447, -2.375e-5  
0.446, -2.337e-5  
0.445, -2.299e-5  
0.444, -2.273e-5  
0.443, -2.233e-5  
0.442, -2.196e-5  
0.441, -2.170e-5  
0.440, -2.133e-5  
0.439, -2.097e-5  
0.438, -2.074e-5  
0.437, -2.038e-5  
0.436, -2.003e-5  
0.435, -1.979e-5  
0.434, -1.942e-5  
0.433, -1.909e-5  
0.432, -1.888e-5  
0.431, -1.856e-5  
0.430, -1.827e-5  
0.429, -1.804e-5  
0.428, -1.773e-5  
0.427, -1.743e-5  
0.426, -1.720e-5  
0.425, -1.688e-5  
0.424, -1.659e-5  
0.423, -1.640e-5  
0.422, -1.612e-5  
0.421, -1.585e-5  
0.420, -1.566e-5  
0.419, -1.539e-5  
0.418, -1.512e-5  
0.417, -1.493e-5  
0.416, -1.466e-5  
0.415, -1.439e-5  
0.414, -1.421e-5  
0.413, -1.394e-5  
0.412, -1.369e-5  
0.411, -1.352e-5  
0.410, -1.324e-5  
0.409, -1.298e-5  
0.408, -1.282e-5  
0.407, -1.256e-5  
0.406, -1.232e-5  
0.405, -1.212e-5  
0.404, -1.190e-5  
0.403, -1.168e-5  
0.402, -1.152e-5  
0.401, -1.127e-5  
0.400, -1.106e-5  
0.399, -1.092e-5

0.398, -1.070e-5  
0.397, -1.046e-5  
0.396, -1.030e-5  
0.395, -1.009e-5  
0.394, -9.879e-6  
0.393, -9.739e-6  
0.392, -9.525e-6  
0.391, -9.311e-6  
0.390, -9.189e-6  
0.389, -8.997e-6  
0.388, -8.797e-6  
0.387, -8.670e-6  
0.386, -8.463e-6  
0.385, -8.284e-6  
0.384, -8.166e-6  
0.383, -7.958e-6  
0.382, -7.795e-6  
0.381, -7.685e-6  
0.380, -7.491e-6  
0.379, -7.331e-6  
0.378, -7.214e-6  
0.377, -7.033e-6  
0.376, -6.868e-6  
0.375, -6.737e-6  
0.374, -6.580e-6  
0.373, -6.421e-6  
0.372, -6.315e-6  
0.371, -6.150e-6  
0.370, -6.008e-6  
0.369, -5.893e-6  
0.368, -5.721e-6  
0.367, -5.588e-6  
0.366, -5.492e-6  
0.365, -5.344e-6  
0.364, -5.188e-6  
0.363, -5.097e-6  
0.362, -4.949e-6  
0.361, -4.805e-6  
0.360, -4.699e-6  
0.359, -4.554e-6  
0.358, -4.410e-6  
0.357, -4.326e-6  
0.356, -4.195e-6  
0.355, -4.068e-6  
0.354, -3.982e-6  
0.353, -3.851e-6  
0.352, -3.728e-6  
0.351, -3.639e-6  
0.350, -3.511e-6  
0.349, -3.396e-6

0.348, -3.304e-6  
0.347, -3.176e-6  
0.346, -3.071e-6  
0.345, -2.999e-6  
0.344, -2.884e-6  
0.343, -2.756e-6  
0.342, -2.695e-6  
0.341, -2.575e-6  
0.340, -2.430e-6  
0.339, -2.353e-6  
0.338, -2.253e-6  
0.337, -2.141e-6  
0.336, -2.086e-6  
0.335, -1.996e-6  
0.334, -1.897e-6  
0.333, -1.831e-6  
0.332, -1.736e-6  
0.331, -1.643e-6  
0.330, -1.585e-6  
0.329, -1.482e-6  
0.328, -1.379e-6  
0.327, -1.301e-6  
0.326, -1.176e-6  
0.325, -1.087e-6  
0.324, -1.033e-6  
0.323, -9.574e-7  
0.322, -8.857e-7  
0.321, -8.219e-7  
0.320, -7.217e-7  
0.319, -6.441e-7  
0.318, -5.949e-7  
0.317, -5.055e-7  
0.316, -4.083e-7  
0.315, -3.454e-7  
0.314, -2.678e-7  
0.313, -2.010e-7  
0.312, -1.480e-7  
0.311, -6.543e-8  
0.310, 8.252e-9  
0.309, 5.835e-8  
0.308, 1.517e-7  
0.307, 2.372e-7  
0.306, 2.823e-7  
0.305, 3.423e-7  
0.304, 3.934e-7  
0.303, 4.346e-7  
0.302, 5.201e-7  
0.301, 5.967e-7  
0.300, 6.478e-7  
0.299, 7.225e-7

0.298, 8.158e-7  
0.297, 8.629e-7  
0.296, 9.356e-7  
0.295, 1.025e-6  
0.294, 1.077e-6  
0.293, 1.167e-6  
0.292, 1.230e-6  
0.291, 1.263e-6  
0.290, 1.337e-6  
0.289, 1.428e-6  
0.288, 1.462e-6  
0.287, 1.571e-6  
0.286, 1.639e-6  
0.285, 1.665e-6  
0.284, 1.727e-6  
0.283, 1.783e-6  
0.282, 1.837e-6  
0.281, 1.917e-6  
0.280, 1.963e-6  
0.279, 2.008e-6  
0.278, 2.079e-6  
0.277, 2.156e-6  
0.276, 2.189e-6  
0.275, 2.267e-6  
0.274, 2.374e-6  
0.273, 2.401e-6  
0.272, 2.462e-6  
0.271, 2.526e-6  
0.270, 2.571e-6  
0.269, 2.661e-6  
0.268, 2.724e-6  
0.267, 2.763e-6  
0.266, 2.841e-6  
0.265, 2.906e-6  
0.264, 2.934e-6  
0.263, 3.008e-6  
0.262, 3.072e-6  
0.261, 3.106e-6  
0.260, 3.185e-6  
0.259, 3.252e-6  
0.258, 3.288e-6  
0.257, 3.367e-6  
0.256, 3.449e-6  
0.255, 3.482e-6  
0.254, 3.580e-6  
0.253, 3.644e-6  
0.252, 3.679e-6  
0.251, 3.771e-6  
0.250, 3.822e-6  
0.249, 3.861e-6

0.248, 3.932e-6  
0.247, 3.996e-6  
0.246, 4.043e-6  
0.245, 4.129e-6  
0.244, 4.206e-6  
0.243, 4.220e-6  
0.242, 4.299e-6  
0.241, 4.373e-6  
0.240, 4.413e-6  
0.239, 4.500e-6  
0.238, 4.560e-6  
0.237, 4.608e-6  
0.236, 4.694e-6  
0.235, 4.759e-6  
0.234, 4.794e-6  
0.233, 4.887e-6  
0.232, 4.958e-6  
0.231, 5.008e-6  
0.230, 5.098e-6  
0.229, 5.174e-6  
0.228, 5.207e-6  
0.227, 5.309e-6  
0.226, 5.390e-6  
0.225, 5.413e-6  
0.224, 5.504e-6  
0.223, 5.577e-6  
0.222, 5.602e-6  
0.221, 5.699e-6  
0.220, 5.769e-6  
0.219, 5.800e-6  
0.218, 5.923e-6  
0.217, 5.993e-6  
0.216, 6.035e-6  
0.215, 6.113e-6  
0.214, 6.181e-6  
0.213, 6.199e-6  
0.212, 6.303e-6  
0.211, 6.378e-6  
0.210, 6.424e-6  
0.209, 6.533e-6  
0.208, 6.599e-6  
0.207, 6.635e-6  
0.206, 6.745e-6  
0.205, 6.823e-6  
0.204, 6.883e-6  
0.203, 6.944e-6  
0.202, 7.031e-6  
0.201, 7.063e-6  
0.200, 7.164e-6  
0.199, 7.246e-6

0.198, 7.284e-6  
0.197, 7.377e-6  
0.196, 7.471e-6  
0.195, 7.501e-6  
0.194, 7.599e-6  
0.193, 7.686e-6  
0.192, 7.726e-6  
0.191, 7.830e-6  
0.190, 7.922e-6  
0.189, 7.963e-6  
0.188, 8.074e-6  
0.187, 8.190e-6  
0.186, 8.227e-6  
0.185, 8.347e-6  
0.184, 8.428e-6  
0.183, 8.476e-6  
0.182, 8.588e-6  
0.181, 8.677e-6  
0.180, 8.714e-6  
0.179, 8.824e-6  
0.178, 8.955e-6  
0.177, 9.010e-6  
0.176, 9.126e-6  
0.175, 9.222e-6  
0.174, 9.277e-6  
0.173, 9.392e-6  
0.172, 9.485e-6  
0.171, 9.544e-6  
0.170, 9.660e-6  
0.169, 9.778e-6  
0.168, 9.850e-6  
0.167, 9.970e-6  
0.166, 1.008e-5  
0.165, 1.015e-5  
0.164, 1.030e-5  
0.163, 1.041e-5  
0.162, 1.045e-5  
0.161, 1.060e-5  
0.160, 1.073e-5  
0.159, 1.082e-5  
0.158, 1.095e-5  
0.157, 1.108e-5  
0.156, 1.115e-5  
0.155, 1.132e-5  
0.154, 1.148e-5  
0.153, 1.156e-5  
0.152, 1.172e-5  
0.151, 1.187e-5  
0.150, 1.198e-5  
0.149, 1.214e-5



0.148, 1.228e-5  
0.147, 1.237e-5  
0.146, 1.257e-5  
0.145, 1.274e-5  
0.144, 1.283e-5  
0.143, 1.302e-5  
0.142, 1.318e-5  
0.141, 1.328e-5  
0.140, 1.348e-5  
0.139, 1.366e-5  
0.138, 1.377e-5  
0.137, 1.398e-5  
0.136, 1.416e-5  
0.135, 1.429e-5  
0.134, 1.451e-5  
0.133, 1.473e-5  
0.132, 1.487e-5  
0.131, 1.510e-5  
0.130, 1.533e-5  
0.129, 1.547e-5  
0.128, 1.572e-5  
0.127, 1.595e-5  
0.126, 1.608e-5  
0.125, 1.635e-5  
0.124, 1.660e-5  
0.123, 1.677e-5  
0.122, 1.704e-5  
0.121, 1.729e-5  
0.120, 1.745e-5  
0.119, 1.778e-5  
0.118, 1.803e-5  
0.117, 1.820e-5  
0.116, 1.851e-5  
0.115, 1.880e-5  
0.114, 1.898e-5  
0.113, 1.927e-5  
0.112, 1.958e-5  
0.111, 1.978e-5  
0.110, 2.008e-5  
0.109, 2.040e-5  
0.108, 2.062e-5  
0.107, 2.093e-5  
0.106, 2.122e-5  
0.105, 2.144e-5  
0.104, 2.175e-5  
0.103, 2.205e-5  
0.102, 2.227e-5  
0.101, 2.264e-5  
0.100, 2.295e-5  
0.099, 2.315e-5

0.098, 2.350e-5  
0.097, 2.384e-5  
0.096, 2.406e-5  
0.095, 2.441e-5  
0.094, 2.475e-5  
0.093, 2.496e-5  
0.092, 2.535e-5  
0.091, 2.568e-5  
0.090, 2.592e-5  
0.089, 2.631e-5  
0.088, 2.665e-5  
0.087, 2.689e-5  
0.086, 2.723e-5  
0.085, 2.757e-5  
0.084, 2.781e-5  
0.083, 2.816e-5  
0.082, 2.851e-5  
0.081, 2.874e-5  
0.080, 2.911e-5  
0.079, 2.947e-5  
0.078, 2.967e-5  
0.077, 3.004e-5  
0.076, 3.036e-5  
0.075, 3.056e-5  
0.074, 3.093e-5  
0.073, 3.126e-5  
0.072, 3.149e-5  
0.071, 3.186e-5  
0.070, 3.216e-5  
0.069, 3.238e-5  
0.068, 3.273e-5  
0.067, 3.302e-5  
0.066, 3.323e-5  
0.065, 3.358e-5  
0.064, 3.387e-5  
0.063, 3.408e-5  
0.062, 3.441e-5  
0.061, 3.474e-5  
0.060, 3.491e-5  
0.059, 3.522e-5  
0.058, 3.553e-5  
0.057, 3.569e-5  
0.056, 3.600e-5  
0.055, 3.628e-5  
0.054, 3.647e-5  
0.053, 3.678e-5  
0.052, 3.707e-5  
0.051, 3.723e-5  
0.050, 3.752e-5  
0.049, 3.778e-5

0.048, 3.793e-5  
0.047, 3.822e-5  
0.046, 3.846e-5  
0.045, 3.863e-5  
0.044, 3.892e-5  
0.043, 3.916e-5  
0.042, 3.933e-5  
0.041, 3.959e-5  
0.040, 3.982e-5  
0.039, 3.998e-5  
0.038, 4.024e-5  
0.037, 4.049e-5  
0.036, 4.063e-5  
0.035, 4.088e-5  
0.034, 4.112e-5  
0.033, 4.124e-5  
0.032, 4.148e-5  
0.031, 4.167e-5  
0.030, 4.179e-5  
0.029, 4.203e-5  
0.028, 4.224e-5  
0.027, 4.236e-5  
0.026, 4.262e-5  
0.025, 4.284e-5  
0.024, 4.295e-5  
0.023, 4.318e-5  
0.022, 4.338e-5  
0.021, 4.351e-5  
0.020, 4.375e-5  
0.019, 4.391e-5  
0.018, 4.404e-5  
0.017, 4.426e-5  
0.016, 4.445e-5  
0.015, 4.461e-5  
0.014, 4.483e-5  
0.013, 4.502e-5  
0.012, 4.513e-5  
0.011, 4.533e-5  
0.010, 4.553e-5  
0.009, 4.562e-5  
0.008, 4.581e-5  
0.007, 4.599e-5  
0.006, 4.609e-5  
0.005, 4.631e-5  
0.004, 4.649e-5  
0.003, 4.662e-5  
0.002, 4.682e-5  
0.001, 4.701e-5  
0.000, 4.714e-5  
-0.001, 4.735e-5

-0.002, 4.753e-5  
-0.003, 4.762e-5  
-0.004, 4.781e-5  
-0.005, 4.798e-5  
-0.006, 4.810e-5  
-0.007, 4.829e-5  
-0.008, 4.845e-5  
-0.009, 4.857e-5  
-0.010, 4.876e-5  
-0.011, 4.892e-5  
-0.012, 4.902e-5  
-0.013, 4.921e-5  
-0.014, 4.938e-5  
-0.015, 4.949e-5  
-0.016, 4.970e-5  
-0.017, 4.987e-5  
-0.018, 4.995e-5  
-0.019, 5.014e-5  
-0.020, 5.030e-5  
-0.021, 5.039e-5  
-0.022, 5.061e-5  
-0.023, 5.076e-5  
-0.024, 5.087e-5  
-0.025, 5.107e-5  
-0.026, 5.122e-5  
-0.027, 5.130e-5  
-0.028, 5.151e-5  
-0.029, 5.167e-5  
-0.030, 5.177e-5  
-0.031, 5.198e-5  
-0.032, 5.216e-5  
-0.033, 5.225e-5  
-0.034, 5.244e-5  
-0.035, 5.261e-5  
-0.036, 5.271e-5  
-0.037, 5.292e-5  
-0.038, 5.310e-5  
-0.039, 5.318e-5  
-0.040, 5.337e-5  
-0.041, 5.353e-5  
-0.042, 5.363e-5  
-0.043, 5.384e-5  
-0.044, 5.402e-5  
-0.045, 5.413e-5  
-0.046, 5.433e-5  
-0.047, 5.448e-5  
-0.048, 5.455e-5  
-0.049, 5.473e-5  
-0.050, 5.488e-5  
-0.051, 5.498e-5

-0.052, 5.521e-5  
-0.053, 5.536e-5  
-0.054, 5.545e-5  
-0.055, 5.567e-5  
-0.056, 5.582e-5  
-0.057, 5.592e-5  
-0.058, 5.611e-5  
-0.059, 5.628e-5  
-0.060, 5.638e-5  
-0.061, 5.657e-5  
-0.062, 5.674e-5  
-0.063, 5.684e-5  
-0.064, 5.701e-5  
-0.065, 5.719e-5  
-0.066, 5.729e-5  
-0.067, 5.748e-5  
-0.068, 5.767e-5  
-0.069, 5.778e-5  
-0.070, 5.797e-5  
-0.071, 5.815e-5  
-0.072, 5.825e-5  
-0.073, 5.844e-5  
-0.074, 5.861e-5  
-0.075, 5.873e-5  
-0.076, 5.892e-5  
-0.077, 5.908e-5  
-0.078, 5.918e-5  
-0.079, 5.940e-5  
-0.080, 5.957e-5  
-0.081, 5.968e-5  
-0.082, 5.987e-5  
-0.083, 6.007e-5  
-0.084, 6.017e-5  
-0.085, 6.035e-5  
-0.086, 6.052e-5  
-0.087, 6.061e-5  
-0.088, 6.081e-5  
-0.089, 6.097e-5  
-0.090, 6.105e-5  
-0.091, 6.125e-5  
-0.092, 6.144e-5  
-0.093, 6.154e-5  
-0.094, 6.173e-5  
-0.095, 6.189e-5  
-0.096, 6.199e-5  
-0.097, 6.221e-5  
-0.098, 6.239e-5  
-0.099, 6.249e-5  
-0.100, 6.271e-5  
-0.101, 6.292e-5

-0.102, 6.305e-5  
-0.103, 6.325e-5  
-0.104, 6.342e-5  
-0.105, 6.350e-5  
-0.106, 6.370e-5  
-0.107, 6.387e-5  
-0.108, 6.399e-5  
-0.109, 6.420e-5  
-0.110, 6.438e-5  
-0.111, 6.449e-5  
-0.112, 6.471e-5  
-0.113, 6.491e-5  
-0.114, 6.500e-5  
-0.115, 6.521e-5  
-0.116, 6.539e-5  
-0.117, 6.552e-5  
-0.118, 6.574e-5  
-0.119, 6.592e-5  
-0.120, 6.601e-5  
-0.121, 6.621e-5  
-0.122, 6.637e-5  
-0.123, 6.647e-5  
-0.124, 6.668e-5  
-0.125, 6.686e-5  
-0.126, 6.694e-5  
-0.127, 6.714e-5  
-0.128, 6.732e-5  
-0.129, 6.742e-5  
-0.130, 6.762e-5  
-0.131, 6.782e-5  
-0.132, 6.794e-5  
-0.133, 6.813e-5  
-0.134, 6.832e-5  
-0.135, 6.843e-5  
-0.136, 6.863e-5  
-0.137, 6.882e-5  
-0.138, 6.891e-5  
-0.139, 6.912e-5  
-0.140, 6.932e-5  
-0.141, 6.944e-5  
-0.142, 6.968e-5  
-0.143, 6.988e-5  
-0.144, 6.999e-5  
-0.145, 7.019e-5  
-0.146, 7.035e-5  
-0.147, 7.045e-5  
-0.148, 7.068e-5  
-0.149, 7.084e-5  
-0.150, 7.094e-5  
-0.151, 7.117e-5

-0.152, 7.133e-5  
-0.153, 7.143e-5  
-0.154, 7.164e-5  
-0.155, 7.182e-5  
-0.156, 7.195e-5  
-0.157, 7.215e-5  
-0.158, 7.233e-5  
-0.159, 7.243e-5  
-0.160, 7.264e-5  
-0.161, 7.283e-5  
-0.162, 7.296e-5  
-0.163, 7.318e-5  
-0.164, 7.336e-5  
-0.165, 7.348e-5  
-0.166, 7.371e-5  
-0.167, 7.391e-5  
-0.168, 7.404e-5  
-0.169, 7.427e-5  
-0.170, 7.445e-5  
-0.171, 7.459e-5  
-0.172, 7.483e-5  
-0.173, 7.499e-5  
-0.174, 7.509e-5  
-0.175, 7.531e-5  
-0.176, 7.549e-5  
-0.177, 7.563e-5  
-0.178, 7.585e-5  
-0.179, 7.604e-5  
-0.180, 7.617e-5  
-0.181, 7.639e-5  
-0.182, 7.658e-5  
-0.183, 7.671e-5  
-0.184, 7.691e-5  
-0.185, 7.712e-5  
-0.186, 7.725e-5  
-0.187, 7.749e-5  
-0.188, 7.770e-5  
-0.189, 7.782e-5  
-0.190, 7.806e-5  
-0.191, 7.828e-5  
-0.192, 7.845e-5  
-0.193, 7.867e-5  
-0.194, 7.887e-5  
-0.195, 7.899e-5  
-0.196, 7.924e-5  
-0.197, 7.943e-5  
-0.198, 7.956e-5  
-0.199, 7.981e-5  
-0.200, 8.001e-5  
-0.201, 8.017e-5

-0.202, 8.044e-5  
-0.203, 8.065e-5  
-0.204, 8.080e-5  
-0.205, 8.108e-5  
-0.206, 8.129e-5  
-0.207, 8.142e-5  
-0.208, 8.173e-5  
-0.209, 8.197e-5  
-0.210, 8.209e-5  
-0.211, 8.237e-5  
-0.212, 8.259e-5  
-0.213, 8.273e-5  
-0.214, 8.298e-5  
-0.215, 8.323e-5  
-0.216, 8.338e-5  
-0.217, 8.363e-5  
-0.218, 8.381e-5  
-0.219, 8.394e-5  
-0.220, 8.421e-5  
-0.221, 8.444e-5  
-0.222, 8.458e-5  
-0.223, 8.481e-5  
-0.224, 8.505e-5  
-0.225, 8.520e-5  
-0.226, 8.545e-5  
-0.227, 8.566e-5  
-0.228, 8.582e-5  
-0.229, 8.607e-5  
-0.230, 8.628e-5  
-0.231, 8.639e-5  
-0.232, 8.662e-5  
-0.233, 8.683e-5  
-0.234, 8.695e-5  
-0.235, 8.721e-5  
-0.236, 8.741e-5  
-0.237, 8.753e-5  
-0.238, 8.775e-5  
-0.239, 8.796e-5  
-0.240, 8.811e-5  
-0.241, 8.837e-5  
-0.242, 8.859e-5  
-0.243, 8.873e-5  
-0.244, 8.897e-5  
-0.245, 8.917e-5  
-0.246, 8.927e-5  
-0.247, 8.949e-5  
-0.248, 8.969e-5  
-0.249, 8.980e-5  
-0.250, 9.003e-5  
-0.251, 9.024e-5



-0.252, 9.035e-5  
-0.253, 9.058e-5  
-0.254, 9.077e-5  
-0.255, 9.088e-5  
-0.256, 9.111e-5  
-0.257, 9.132e-5  
-0.258, 9.142e-5  
-0.259, 9.164e-5  
-0.260, 9.184e-5  
-0.261, 9.194e-5  
-0.262, 9.212e-5  
-0.263, 9.228e-5  
-0.264, 9.236e-5  
-0.265, 9.256e-5  
-0.266, 9.275e-5  
-0.267, 9.284e-5  
-0.268, 9.305e-5  
-0.269, 9.322e-5  
-0.270, 9.330e-5  
-0.271, 9.353e-5  
-0.272, 9.368e-5  
-0.273, 9.380e-5  
-0.274, 9.400e-5  
-0.275, 9.416e-5  
-0.276, 9.422e-5  
-0.277, 9.437e-5  
-0.278, 9.450e-5  
-0.279, 9.457e-5  
-0.280, 9.475e-5  
-0.281, 9.490e-5  
-0.282, 9.496e-5  
-0.283, 9.510e-5  
-0.284, 9.518e-5  
-0.285, 9.519e-5  
-0.286, 9.537e-5  
-0.287, 9.552e-5  
-0.288, 9.559e-5  
-0.289, 9.574e-5  
-0.290, 9.585e-5  
-0.291, 9.591e-5  
-0.292, 9.611e-5  
-0.293, 9.624e-5  
-0.294, 9.631e-5  
-0.295, 9.647e-5  
-0.296, 9.661e-5  
-0.297, 9.663e-5  
-0.298, 9.675e-5  
-0.299, 9.684e-5  
-0.300, 9.686e-5  
-0.301, 9.700e-5

-0.302, 9.709e-5  
-0.303, 9.712e-5  
-0.304, 9.723e-5  
-0.305, 9.733e-5  
-0.306, 9.735e-5  
-0.307, 9.748e-5  
-0.308, 9.757e-5  
-0.309, 9.757e-5  
-0.310, 9.769e-5  
-0.311, 9.779e-5  
-0.312, 9.781e-5  
-0.313, 9.794e-5  
-0.314, 9.801e-5  
-0.315, 9.802e-5  
-0.316, 9.815e-5  
-0.317, 9.822e-5  
-0.318, 9.824e-5  
-0.319, 9.834e-5  
-0.320, 9.842e-5  
-0.321, 9.842e-5  
-0.322, 9.853e-5  
-0.323, 9.859e-5  
-0.324, 9.858e-5  
-0.325, 9.869e-5  
-0.326, 9.875e-5  
-0.327, 9.874e-5  
-0.328, 9.882e-5  
-0.329, 9.888e-5  
-0.330, 9.887e-5  
-0.331, 9.896e-5  
-0.332, 9.901e-5  
-0.333, 9.900e-5  
-0.334, 9.910e-5  
-0.335, 9.918e-5  
-0.336, 9.916e-5  
-0.337, 9.926e-5  
-0.338, 9.929e-5  
-0.339, 9.929e-5  
-0.340, 9.938e-5  
-0.341, 9.943e-5  
-0.342, 9.941e-5  
-0.343, 9.950e-5  
-0.344, 9.953e-5  
-0.345, 9.951e-5  
-0.346, 9.959e-5  
-0.347, 9.964e-5  
-0.348, 9.961e-5  
-0.349, 9.968e-5  
-0.350, 9.974e-5  
-0.351, 9.971e-5

-0.352, 9.978e-5  
-0.353, 9.983e-5  
-0.354, 9.979e-5  
-0.355, 9.984e-5  
-0.356, 9.987e-5  
-0.357, 9.984e-5  
-0.358, 9.991e-5  
-0.359, 9.996e-5  
-0.360, 9.994e-5  
-0.361, 1.000e-4  
-0.362, 1.000e-4  
-0.363, 9.995e-5  
-0.364, 1.000e-4  
-0.365, 1.000e-4  
-0.366, 9.995e-5  
-0.367, 1.000e-4  
-0.368, 1.000e-4  
-0.369, 9.998e-5  
-0.370, 1.000e-4  
-0.371, 1.000e-4  
-0.372, 9.998e-5  
-0.373, 1.000e-4  
-0.374, 1.000e-4  
-0.375, 9.997e-5  
-0.376, 1.000e-4  
-0.377, 1.000e-4  
-0.378, 9.997e-5  
-0.379, 1.000e-4  
-0.380, 1.000e-4  
-0.381, 9.997e-5  
-0.382, 1.000e-4  
-0.383, 1.000e-4  
-0.384, 9.995e-5  
-0.385, 1.000e-4  
-0.386, 1.000e-4  
-0.387, 9.992e-5  
-0.388, 9.996e-5  
-0.389, 9.993e-5  
-0.390, 9.986e-5  
-0.391, 9.989e-5  
-0.392, 9.987e-5  
-0.393, 9.978e-5  
-0.394, 9.980e-5  
-0.395, 9.978e-5  
-0.396, 9.969e-5  
-0.397, 9.971e-5  
-0.398, 9.970e-5  
-0.399, 9.959e-5

Mar. 30, 2021 04:01:03

Linear Sweep Voltammetry

File: c:\users\shadji04\desktop\sofia cv\30032021\complex 6 sweep experiment under n2\1000 rpm\_25 mv rate.txt

Data Source: Experiment

Instrument Model: CHI650E

Header:

Note: 1000 rpm

Init E (V) = 0.8

Final E (V) = -0.4

Scan Rate (V/s) = 0.025

Sample Interval (V) = 0.001

Quiet Time (sec) = 2

Sensitivity (A/V) = 0.001

Potential/V, Current/A

0.800, -1.214e-4

0.799, -1.211e-4

0.798, -1.209e-4

0.797, -1.207e-4

0.796, -1.206e-4

0.795, -1.203e-4

0.794, -1.199e-4

0.793, -1.193e-4

0.792, -1.189e-4

0.791, -1.193e-4

0.790, -1.187e-4

0.789, -1.185e-4

0.788, -1.184e-4

0.787, -1.181e-4

0.786, -1.177e-4

0.785, -1.175e-4

0.784, -1.176e-4

0.783, -1.176e-4

0.782, -1.174e-4

0.781, -1.170e-4

0.780, -1.164e-4

0.779, -1.159e-4

0.778, -1.156e-4

0.777, -1.155e-4

0.776, -1.155e-4

0.775, -1.155e-4

0.774, -1.155e-4

0.773, -1.154e-4

0.772, -1.151e-4

0.771, -1.144e-4

0.770, -1.142e-4

0.769, -1.140e-4

0.768, -1.135e-4

0.767, -1.133e-4

0.766, -1.130e-4

0.765, -1.129e-4

0.764, -1.129e-4

0.763, -1.129e-4  
0.762, -1.127e-4  
0.761, -1.124e-4  
0.760, -1.120e-4  
0.759, -1.118e-4  
0.758, -1.118e-4  
0.757, -1.114e-4  
0.756, -1.109e-4  
0.755, -1.106e-4  
0.754, -1.102e-4  
0.753, -1.103e-4  
0.752, -1.102e-4  
0.751, -1.099e-4  
0.750, -1.095e-4  
0.749, -1.097e-4  
0.748, -1.096e-4  
0.747, -1.092e-4  
0.746, -1.087e-4  
0.745, -1.084e-4  
0.744, -1.083e-4  
0.743, -1.082e-4  
0.742, -1.079e-4  
0.741, -1.076e-4  
0.740, -1.076e-4  
0.739, -1.074e-4  
0.738, -1.072e-4  
0.737, -1.074e-4  
0.736, -1.072e-4  
0.735, -1.065e-4  
0.734, -1.061e-4  
0.733, -1.056e-4  
0.732, -1.054e-4  
0.731, -1.053e-4  
0.730, -1.052e-4  
0.729, -1.051e-4  
0.728, -1.051e-4  
0.727, -1.048e-4  
0.726, -1.045e-4  
0.725, -1.040e-4  
0.724, -1.032e-4  
0.723, -1.030e-4  
0.722, -1.036e-4  
0.721, -1.039e-4  
0.720, -1.036e-4  
0.719, -1.035e-4  
0.718, -1.036e-4  
0.717, -1.033e-4  
0.716, -1.028e-4  
0.715, -1.022e-4  
0.714, -1.019e-4

0.713, -1.017e-4  
0.712, -1.013e-4  
0.711, -1.011e-4  
0.710, -1.013e-4  
0.709, -1.013e-4  
0.708, -1.012e-4  
0.707, -1.009e-4  
0.706, -1.005e-4  
0.705, -1.006e-4  
0.704, -1.005e-4  
0.703, -1.003e-4  
0.702, -9.999e-5  
0.701, -9.987e-5  
0.700, -9.959e-5  
0.699, -9.937e-5  
0.698, -9.898e-5  
0.697, -9.865e-5  
0.696, -9.857e-5  
0.695, -9.815e-5  
0.694, -9.771e-5  
0.693, -9.770e-5  
0.692, -9.764e-5  
0.691, -9.751e-5  
0.690, -9.752e-5  
0.689, -9.747e-5  
0.688, -9.741e-5  
0.687, -9.707e-5  
0.686, -9.679e-5  
0.685, -9.650e-5  
0.684, -9.640e-5  
0.683, -9.609e-5  
0.682, -9.568e-5  
0.681, -9.531e-5  
0.680, -9.510e-5  
0.679, -9.512e-5  
0.678, -9.508e-5  
0.677, -9.487e-5  
0.676, -9.460e-5  
0.675, -9.444e-5  
0.674, -9.429e-5  
0.673, -9.406e-5  
0.672, -9.381e-5  
0.671, -9.353e-5  
0.670, -9.321e-5  
0.669, -9.311e-5  
0.668, -9.289e-5  
0.667, -9.266e-5  
0.666, -9.252e-5  
0.665, -9.245e-5  
0.664, -9.208e-5

0.663, -9.186e-5  
0.662, -9.154e-5  
0.661, -9.149e-5  
0.660, -9.139e-5  
0.659, -9.132e-5  
0.658, -9.125e-5  
0.657, -9.114e-5  
0.656, -9.093e-5  
0.655, -9.042e-5  
0.654, -8.986e-5  
0.653, -8.954e-5  
0.652, -8.932e-5  
0.651, -8.916e-5  
0.650, -8.895e-5  
0.649, -8.880e-5  
0.648, -8.858e-5  
0.647, -8.863e-5  
0.646, -8.877e-5  
0.645, -8.875e-5  
0.644, -8.864e-5  
0.643, -8.819e-5  
0.642, -8.769e-5  
0.641, -8.753e-5  
0.640, -8.738e-5  
0.639, -8.715e-5  
0.638, -8.715e-5  
0.637, -8.712e-5  
0.636, -8.686e-5  
0.635, -8.657e-5  
0.634, -8.632e-5  
0.633, -8.618e-5  
0.632, -8.607e-5  
0.631, -8.592e-5  
0.630, -8.584e-5  
0.629, -8.571e-5  
0.628, -8.540e-5  
0.627, -8.507e-5  
0.626, -8.495e-5  
0.625, -8.505e-5  
0.624, -8.497e-5  
0.623, -8.489e-5  
0.622, -8.442e-5  
0.621, -8.403e-5  
0.620, -8.381e-5  
0.619, -8.351e-5  
0.618, -8.349e-5  
0.617, -8.320e-5  
0.616, -8.291e-5  
0.615, -8.278e-5  
0.614, -8.284e-5

0.613, -8.282e-5  
0.612, -8.269e-5  
0.611, -8.252e-5  
0.610, -8.227e-5  
0.609, -8.211e-5  
0.608, -8.211e-5  
0.607, -8.189e-5  
0.606, -8.181e-5  
0.605, -8.150e-5  
0.604, -8.120e-5  
0.603, -8.105e-5  
0.602, -8.080e-5  
0.601, -8.070e-5  
0.600, -8.054e-5  
0.599, -8.054e-5  
0.598, -8.046e-5  
0.597, -8.021e-5  
0.596, -7.997e-5  
0.595, -7.971e-5  
0.594, -7.967e-5  
0.593, -7.948e-5  
0.592, -7.944e-5  
0.591, -7.933e-5  
0.590, -7.912e-5  
0.589, -7.882e-5  
0.588, -7.852e-5  
0.587, -7.831e-5  
0.586, -7.805e-5  
0.585, -7.797e-5  
0.584, -7.796e-5  
0.583, -7.793e-5  
0.582, -7.777e-5  
0.581, -7.741e-5  
0.580, -7.728e-5  
0.579, -7.724e-5  
0.578, -7.721e-5  
0.577, -7.693e-5  
0.576, -7.664e-5  
0.575, -7.642e-5  
0.574, -7.639e-5  
0.573, -7.635e-5  
0.572, -7.636e-5  
0.571, -7.616e-5  
0.570, -7.600e-5  
0.569, -7.563e-5  
0.568, -7.515e-5  
0.567, -7.492e-5  
0.566, -7.476e-5  
0.565, -7.460e-5  
0.564, -7.421e-5



0.563, -7.393e-5  
0.562, -7.384e-5  
0.561, -7.386e-5  
0.560, -7.373e-5  
0.559, -7.339e-5  
0.558, -7.295e-5  
0.557, -7.273e-5  
0.556, -7.265e-5  
0.555, -7.256e-5  
0.554, -7.247e-5  
0.553, -7.225e-5  
0.552, -7.211e-5  
0.551, -7.201e-5  
0.550, -7.178e-5  
0.549, -7.155e-5  
0.548, -7.138e-5  
0.547, -7.120e-5  
0.546, -7.094e-5  
0.545, -7.066e-5  
0.544, -7.045e-5  
0.543, -7.014e-5  
0.542, -6.992e-5  
0.541, -6.954e-5  
0.540, -6.931e-5  
0.539, -6.907e-5  
0.538, -6.883e-5  
0.537, -6.856e-5  
0.536, -6.820e-5  
0.535, -6.803e-5  
0.534, -6.772e-5  
0.533, -6.733e-5  
0.532, -6.707e-5  
0.531, -6.693e-5  
0.530, -6.669e-5  
0.529, -6.637e-5  
0.528, -6.611e-5  
0.527, -6.586e-5  
0.526, -6.573e-5  
0.525, -6.563e-5  
0.524, -6.544e-5  
0.523, -6.500e-5  
0.522, -6.451e-5  
0.521, -6.406e-5  
0.520, -6.383e-5  
0.519, -6.371e-5  
0.518, -6.365e-5  
0.517, -6.338e-5  
0.516, -6.309e-5  
0.515, -6.268e-5  
0.514, -6.214e-5

0.513, -6.173e-5  
0.512, -6.123e-5  
0.511, -6.072e-5  
0.510, -6.028e-5  
0.509, -5.996e-5  
0.508, -5.978e-5  
0.507, -5.956e-5  
0.506, -5.921e-5  
0.505, -5.868e-5  
0.504, -5.826e-5  
0.503, -5.788e-5  
0.502, -5.747e-5  
0.501, -5.708e-5  
0.500, -5.673e-5  
0.499, -5.648e-5  
0.498, -5.619e-5  
0.497, -5.581e-5  
0.496, -5.523e-5  
0.495, -5.483e-5  
0.494, -5.438e-5  
0.493, -5.389e-5  
0.492, -5.334e-5  
0.491, -5.280e-5  
0.490, -5.252e-5  
0.489, -5.215e-5  
0.488, -5.165e-5  
0.487, -5.125e-5  
0.486, -5.074e-5  
0.485, -5.027e-5  
0.484, -4.986e-5  
0.483, -4.934e-5  
0.482, -4.882e-5  
0.481, -4.820e-5  
0.480, -4.768e-5  
0.479, -4.733e-5  
0.478, -4.696e-5  
0.477, -4.643e-5  
0.476, -4.608e-5  
0.475, -4.563e-5  
0.474, -4.525e-5  
0.473, -4.472e-5  
0.472, -4.410e-5  
0.471, -4.348e-5  
0.470, -4.284e-5  
0.469, -4.230e-5  
0.468, -4.179e-5  
0.467, -4.135e-5  
0.466, -4.088e-5  
0.465, -4.043e-5  
0.464, -4.008e-5

0.463, -3.969e-5  
0.462, -3.928e-5  
0.461, -3.871e-5  
0.460, -3.811e-5  
0.459, -3.761e-5  
0.458, -3.703e-5  
0.457, -3.657e-5  
0.456, -3.599e-5  
0.455, -3.545e-5  
0.454, -3.504e-5  
0.453, -3.465e-5  
0.452, -3.427e-5  
0.451, -3.378e-5  
0.450, -3.324e-5  
0.449, -3.273e-5  
0.448, -3.231e-5  
0.447, -3.187e-5  
0.446, -3.142e-5  
0.445, -3.091e-5  
0.444, -3.039e-5  
0.443, -2.999e-5  
0.442, -2.959e-5  
0.441, -2.921e-5  
0.440, -2.884e-5  
0.439, -2.840e-5  
0.438, -2.792e-5  
0.437, -2.747e-5  
0.436, -2.705e-5  
0.435, -2.660e-5  
0.434, -2.617e-5  
0.433, -2.580e-5  
0.432, -2.542e-5  
0.431, -2.498e-5  
0.430, -2.458e-5  
0.429, -2.418e-5  
0.428, -2.378e-5  
0.427, -2.341e-5  
0.426, -2.301e-5  
0.425, -2.258e-5  
0.424, -2.219e-5  
0.423, -2.183e-5  
0.422, -2.152e-5  
0.421, -2.119e-5  
0.420, -2.085e-5  
0.419, -2.053e-5  
0.418, -2.015e-5  
0.417, -1.974e-5  
0.416, -1.939e-5  
0.415, -1.905e-5  
0.414, -1.872e-5

0.413, -1.841e-5  
0.412, -1.809e-5  
0.411, -1.777e-5  
0.410, -1.748e-5  
0.409, -1.717e-5  
0.408, -1.685e-5  
0.407, -1.655e-5  
0.406, -1.629e-5  
0.405, -1.600e-5  
0.404, -1.577e-5  
0.403, -1.552e-5  
0.402, -1.525e-5  
0.401, -1.499e-5  
0.400, -1.472e-5  
0.399, -1.443e-5  
0.398, -1.416e-5  
0.397, -1.388e-5  
0.396, -1.359e-5  
0.395, -1.333e-5  
0.394, -1.304e-5  
0.393, -1.279e-5  
0.392, -1.255e-5  
0.391, -1.228e-5  
0.390, -1.205e-5  
0.389, -1.182e-5  
0.388, -1.159e-5  
0.387, -1.136e-5  
0.386, -1.110e-5  
0.385, -1.087e-5  
0.384, -1.065e-5  
0.383, -1.046e-5  
0.382, -1.022e-5  
0.381, -1.001e-5  
0.380, -9.812e-6  
0.379, -9.623e-6  
0.378, -9.436e-6  
0.377, -9.251e-6  
0.376, -9.045e-6  
0.375, -8.838e-6  
0.374, -8.653e-6  
0.373, -8.441e-6  
0.372, -8.267e-6  
0.371, -8.082e-6  
0.370, -7.876e-6  
0.369, -7.683e-6  
0.368, -7.516e-6  
0.367, -7.293e-6  
0.366, -7.128e-6  
0.365, -6.984e-6  
0.364, -6.833e-6

0.363, -6.653e-6  
0.362, -6.502e-6  
0.361, -6.358e-6  
0.360, -6.204e-6  
0.359, -6.035e-6  
0.358, -5.879e-6  
0.357, -5.738e-6  
0.356, -5.610e-6  
0.355, -5.434e-6  
0.354, -5.260e-6  
0.353, -5.125e-6  
0.352, -5.004e-6  
0.351, -4.882e-6  
0.350, -4.759e-6  
0.349, -4.626e-6  
0.348, -4.488e-6  
0.347, -4.340e-6  
0.346, -4.191e-6  
0.345, -4.053e-6  
0.344, -3.946e-6  
0.343, -3.809e-6  
0.342, -3.696e-6  
0.341, -3.586e-6  
0.340, -3.447e-6  
0.339, -3.325e-6  
0.338, -3.209e-6  
0.337, -3.078e-6  
0.336, -2.955e-6  
0.335, -2.862e-6  
0.334, -2.764e-6  
0.333, -2.654e-6  
0.332, -2.543e-6  
0.331, -2.419e-6  
0.330, -2.310e-6  
0.329, -2.209e-6  
0.328, -2.088e-6  
0.327, -1.958e-6  
0.326, -1.865e-6  
0.325, -1.779e-6  
0.324, -1.667e-6  
0.323, -1.592e-6  
0.322, -1.472e-6  
0.321, -1.379e-6  
0.320, -1.306e-6  
0.319, -1.209e-6  
0.318, -1.125e-6  
0.317, -1.034e-6  
0.316, -9.388e-7  
0.315, -8.366e-7  
0.314, -7.217e-7

0.313, -6.362e-7  
0.312, -5.448e-7  
0.311, -4.653e-7  
0.310, -3.916e-7  
0.309, -2.747e-7  
0.308, -1.981e-7  
0.307, -9.392e-8  
0.306, -2.318e-8  
0.305, 4.067e-8  
0.304, 1.193e-7  
0.303, 2.057e-7  
0.302, 2.833e-7  
0.301, 3.884e-7  
0.300, 4.749e-7  
0.299, 5.515e-7  
0.298, 6.232e-7  
0.297, 6.871e-7  
0.296, 7.755e-7  
0.295, 8.914e-7  
0.294, 9.464e-7  
0.293, 1.015e-6  
0.292, 1.104e-6  
0.291, 1.186e-6  
0.290, 1.243e-6  
0.289, 1.306e-6  
0.288, 1.384e-6  
0.287, 1.461e-6  
0.286, 1.547e-6  
0.285, 1.621e-6  
0.284, 1.691e-6  
0.283, 1.783e-6  
0.282, 1.861e-6  
0.281, 1.918e-6  
0.280, 2.001e-6  
0.279, 2.100e-6  
0.278, 2.167e-6  
0.277, 2.238e-6  
0.276, 2.312e-6  
0.275, 2.368e-6  
0.274, 2.474e-6  
0.273, 2.549e-6  
0.272, 2.613e-6  
0.271, 2.694e-6  
0.270, 2.764e-6  
0.269, 2.838e-6  
0.268, 2.922e-6  
0.267, 3.004e-6  
0.266, 3.070e-6  
0.265, 3.152e-6  
0.264, 3.235e-6

0.263, 3.302e-6  
0.262, 3.400e-6  
0.261, 3.506e-6  
0.260, 3.555e-6  
0.259, 3.636e-6  
0.258, 3.695e-6  
0.257, 3.764e-6  
0.256, 3.854e-6  
0.255, 3.947e-6  
0.254, 3.999e-6  
0.253, 4.092e-6  
0.252, 4.171e-6  
0.251, 4.236e-6  
0.250, 4.334e-6  
0.249, 4.415e-6  
0.248, 4.480e-6  
0.247, 4.569e-6  
0.246, 4.655e-6  
0.245, 4.722e-6  
0.244, 4.849e-6  
0.243, 4.925e-6  
0.242, 4.984e-6  
0.241, 5.112e-6  
0.240, 5.195e-6  
0.239, 5.258e-6  
0.238, 5.373e-6  
0.237, 5.461e-6  
0.236, 5.510e-6  
0.235, 5.574e-6  
0.234, 5.645e-6  
0.233, 5.716e-6  
0.232, 5.842e-6  
0.231, 5.951e-6  
0.230, 6.007e-6  
0.229, 6.099e-6  
0.228, 6.189e-6  
0.227, 6.264e-6  
0.226, 6.356e-6  
0.225, 6.437e-6  
0.224, 6.518e-6  
0.223, 6.640e-6  
0.222, 6.706e-6  
0.221, 6.758e-6  
0.220, 6.860e-6  
0.219, 6.945e-6  
0.218, 7.036e-6  
0.217, 7.130e-6  
0.216, 7.231e-6  
0.215, 7.310e-6  
0.214, 7.399e-6

0.213, 7.494e-6  
0.212, 7.593e-6  
0.211, 7.699e-6  
0.210, 7.809e-6  
0.209, 7.886e-6  
0.208, 7.959e-6  
0.207, 8.030e-6  
0.206, 8.122e-6  
0.205, 8.259e-6  
0.204, 8.359e-6  
0.203, 8.444e-6  
0.202, 8.547e-6  
0.201, 8.633e-6  
0.200, 8.703e-6  
0.199, 8.820e-6  
0.198, 8.926e-6  
0.197, 8.999e-6  
0.196, 9.098e-6  
0.195, 9.209e-6  
0.194, 9.301e-6  
0.193, 9.409e-6  
0.192, 9.509e-6  
0.191, 9.599e-6  
0.190, 9.744e-6  
0.189, 9.817e-6  
0.188, 9.902e-6  
0.187, 1.003e-5  
0.186, 1.014e-5  
0.185, 1.024e-5  
0.184, 1.037e-5  
0.183, 1.045e-5  
0.182, 1.052e-5  
0.181, 1.064e-5  
0.180, 1.077e-5  
0.179, 1.088e-5  
0.178, 1.103e-5  
0.177, 1.115e-5  
0.176, 1.126e-5  
0.175, 1.137e-5  
0.174, 1.147e-5  
0.173, 1.156e-5  
0.172, 1.171e-5  
0.171, 1.183e-5  
0.170, 1.194e-5  
0.169, 1.209e-5  
0.168, 1.216e-5  
0.167, 1.225e-5  
0.166, 1.241e-5  
0.165, 1.255e-5  
0.164, 1.266e-5



0.163, 1.282e-5  
0.162, 1.293e-5  
0.161, 1.305e-5  
0.160, 1.319e-5  
0.159, 1.335e-5  
0.158, 1.349e-5  
0.157, 1.360e-5  
0.156, 1.371e-5  
0.155, 1.382e-5  
0.154, 1.404e-5  
0.153, 1.421e-5  
0.152, 1.437e-5  
0.151, 1.451e-5  
0.150, 1.461e-5  
0.149, 1.472e-5  
0.148, 1.495e-5  
0.147, 1.509e-5  
0.146, 1.529e-5  
0.145, 1.551e-5  
0.144, 1.568e-5  
0.143, 1.581e-5  
0.142, 1.603e-5  
0.141, 1.625e-5  
0.140, 1.639e-5  
0.139, 1.660e-5  
0.138, 1.673e-5  
0.137, 1.692e-5  
0.136, 1.720e-5  
0.135, 1.737e-5  
0.134, 1.753e-5  
0.133, 1.777e-5  
0.132, 1.795e-5  
0.131, 1.814e-5  
0.130, 1.836e-5  
0.129, 1.855e-5  
0.128, 1.876e-5  
0.127, 1.908e-5  
0.126, 1.932e-5  
0.125, 1.950e-5  
0.124, 1.979e-5  
0.123, 2.002e-5  
0.122, 2.026e-5  
0.121, 2.055e-5  
0.120, 2.079e-5  
0.119, 2.103e-5  
0.118, 2.134e-5  
0.117, 2.161e-5  
0.116, 2.184e-5  
0.115, 2.209e-5  
0.114, 2.238e-5

0.113, 2.267e-5  
0.112, 2.293e-5  
0.111, 2.315e-5  
0.110, 2.340e-5  
0.109, 2.373e-5  
0.108, 2.403e-5  
0.107, 2.438e-5  
0.106, 2.483e-5  
0.105, 2.521e-5  
0.104, 2.559e-5  
0.103, 2.595e-5  
0.102, 2.626e-5  
0.101, 2.648e-5  
0.100, 2.679e-5  
0.099, 2.712e-5  
0.098, 2.748e-5  
0.097, 2.787e-5  
0.096, 2.817e-5  
0.095, 2.846e-5  
0.094, 2.883e-5  
0.093, 2.920e-5  
0.092, 2.956e-5  
0.091, 2.995e-5  
0.090, 3.026e-5  
0.089, 3.061e-5  
0.088, 3.103e-5  
0.087, 3.141e-5  
0.086, 3.180e-5  
0.085, 3.224e-5  
0.084, 3.262e-5  
0.083, 3.299e-5  
0.082, 3.344e-5  
0.081, 3.374e-5  
0.080, 3.407e-5  
0.079, 3.448e-5  
0.078, 3.476e-5  
0.077, 3.509e-5  
0.076, 3.549e-5  
0.075, 3.582e-5  
0.074, 3.628e-5  
0.073, 3.676e-5  
0.072, 3.713e-5  
0.071, 3.748e-5  
0.070, 3.785e-5  
0.069, 3.816e-5  
0.068, 3.850e-5  
0.067, 3.890e-5  
0.066, 3.929e-5  
0.065, 3.970e-5  
0.064, 4.014e-5

0.063, 4.048e-5  
0.062, 4.084e-5  
0.061, 4.129e-5  
0.060, 4.161e-5  
0.059, 4.192e-5  
0.058, 4.231e-5  
0.057, 4.260e-5  
0.056, 4.291e-5  
0.055, 4.334e-5  
0.054, 4.357e-5  
0.053, 4.391e-5  
0.052, 4.430e-5  
0.051, 4.457e-5  
0.050, 4.490e-5  
0.049, 4.529e-5  
0.048, 4.564e-5  
0.047, 4.606e-5  
0.046, 4.648e-5  
0.045, 4.673e-5  
0.044, 4.700e-5  
0.043, 4.733e-5  
0.042, 4.763e-5  
0.041, 4.804e-5  
0.040, 4.850e-5  
0.039, 4.878e-5  
0.038, 4.891e-5  
0.037, 4.922e-5  
0.036, 4.950e-5  
0.035, 4.982e-5  
0.034, 5.013e-5  
0.033, 5.038e-5  
0.032, 5.070e-5  
0.031, 5.108e-5  
0.030, 5.129e-5  
0.029, 5.152e-5  
0.028, 5.184e-5  
0.027, 5.213e-5  
0.026, 5.223e-5  
0.025, 5.252e-5  
0.024, 5.280e-5  
0.023, 5.318e-5  
0.022, 5.355e-5  
0.021, 5.380e-5  
0.020, 5.412e-5  
0.019, 5.445e-5  
0.018, 5.460e-5  
0.017, 5.488e-5  
0.016, 5.516e-5  
0.015, 5.535e-5  
0.014, 5.559e-5

0.013, 5.586e-5  
0.012, 5.614e-5  
0.011, 5.644e-5  
0.010, 5.674e-5  
0.009, 5.693e-5  
0.008, 5.722e-5  
0.007, 5.749e-5  
0.006, 5.774e-5  
0.005, 5.797e-5  
0.004, 5.828e-5  
0.003, 5.853e-5  
0.002, 5.872e-5  
0.001, 5.898e-5  
0.000, 5.930e-5  
-0.001, 5.953e-5  
-0.002, 5.980e-5  
-0.003, 6.006e-5  
-0.004, 6.034e-5  
-0.005, 6.053e-5  
-0.006, 6.071e-5  
-0.007, 6.100e-5  
-0.008, 6.145e-5  
-0.009, 6.146e-5  
-0.010, 6.148e-5  
-0.011, 6.175e-5  
-0.012, 6.197e-5  
-0.013, 6.215e-5  
-0.014, 6.227e-5  
-0.015, 6.250e-5  
-0.016, 6.278e-5  
-0.017, 6.309e-5  
-0.018, 6.335e-5  
-0.019, 6.370e-5  
-0.020, 6.403e-5  
-0.021, 6.420e-5  
-0.022, 6.433e-5  
-0.023, 6.460e-5  
-0.024, 6.476e-5  
-0.025, 6.503e-5  
-0.026, 6.537e-5  
-0.027, 6.565e-5  
-0.028, 6.586e-5  
-0.029, 6.610e-5  
-0.030, 6.631e-5  
-0.031, 6.653e-5  
-0.032, 6.678e-5  
-0.033, 6.692e-5  
-0.034, 6.720e-5  
-0.035, 6.748e-5  
-0.036, 6.758e-5

-0.037, 6.789e-5  
-0.038, 6.831e-5  
-0.039, 6.832e-5  
-0.040, 6.837e-5  
-0.041, 6.852e-5  
-0.042, 6.863e-5  
-0.043, 6.876e-5  
-0.044, 6.909e-5  
-0.045, 6.939e-5  
-0.046, 6.992e-5  
-0.047, 7.028e-5  
-0.048, 7.025e-5  
-0.049, 7.036e-5  
-0.050, 7.058e-5  
-0.051, 7.084e-5  
-0.052, 7.124e-5  
-0.053, 7.164e-5  
-0.054, 7.185e-5  
-0.055, 7.217e-5  
-0.056, 7.243e-5  
-0.057, 7.261e-5  
-0.058, 7.271e-5  
-0.059, 7.272e-5  
-0.060, 7.271e-5  
-0.061, 7.296e-5  
-0.062, 7.315e-5  
-0.063, 7.348e-5  
-0.064, 7.391e-5  
-0.065, 7.428e-5  
-0.066, 7.450e-5  
-0.067, 7.477e-5  
-0.068, 7.510e-5  
-0.069, 7.520e-5  
-0.070, 7.526e-5  
-0.071, 7.551e-5  
-0.072, 7.560e-5  
-0.073, 7.598e-5  
-0.074, 7.634e-5  
-0.075, 7.650e-5  
-0.076, 7.675e-5  
-0.077, 7.693e-5  
-0.078, 7.707e-5  
-0.079, 7.737e-5  
-0.080, 7.762e-5  
-0.081, 7.770e-5  
-0.082, 7.791e-5  
-0.083, 7.806e-5  
-0.084, 7.819e-5  
-0.085, 7.808e-5  
-0.086, 7.824e-5

-0.087, 7.862e-5  
-0.088, 7.925e-5  
-0.089, 7.955e-5  
-0.090, 7.964e-5  
-0.091, 7.997e-5  
-0.092, 8.018e-5  
-0.093, 8.047e-5  
-0.094, 8.090e-5  
-0.095, 8.120e-5  
-0.096, 8.134e-5  
-0.097, 8.161e-5  
-0.098, 8.201e-5  
-0.099, 8.240e-5  
-0.100, 8.273e-5  
-0.101, 8.300e-5  
-0.102, 8.299e-5  
-0.103, 8.310e-5  
-0.104, 8.335e-5  
-0.105, 8.360e-5  
-0.106, 8.387e-5  
-0.107, 8.415e-5  
-0.108, 8.441e-5  
-0.109, 8.472e-5  
-0.110, 8.509e-5  
-0.111, 8.500e-5  
-0.112, 8.520e-5  
-0.113, 8.539e-5  
-0.114, 8.560e-5  
-0.115, 8.591e-5  
-0.116, 8.627e-5  
-0.117, 8.645e-5  
-0.118, 8.683e-5  
-0.119, 8.713e-5  
-0.120, 8.726e-5  
-0.121, 8.740e-5  
-0.122, 8.776e-5  
-0.123, 8.798e-5  
-0.124, 8.828e-5  
-0.125, 8.856e-5  
-0.126, 8.855e-5  
-0.127, 8.865e-5  
-0.128, 8.901e-5  
-0.129, 8.922e-5  
-0.130, 8.943e-5  
-0.131, 8.971e-5  
-0.132, 8.974e-5  
-0.133, 8.996e-5  
-0.134, 9.028e-5  
-0.135, 9.046e-5  
-0.136, 9.091e-5

-0.137, 9.132e-5  
-0.138, 9.162e-5  
-0.139, 9.201e-5  
-0.140, 9.223e-5  
-0.141, 9.241e-5  
-0.142, 9.259e-5  
-0.143, 9.276e-5  
-0.144, 9.289e-5  
-0.145, 9.325e-5  
-0.146, 9.373e-5  
-0.147, 9.354e-5  
-0.148, 9.375e-5  
-0.149, 9.407e-5  
-0.150, 9.420e-5  
-0.151, 9.433e-5  
-0.152, 9.471e-5  
-0.153, 9.489e-5  
-0.154, 9.517e-5  
-0.155, 9.557e-5  
-0.156, 9.560e-5  
-0.157, 9.583e-5  
-0.158, 9.621e-5  
-0.159, 9.641e-5  
-0.160, 9.664e-5  
-0.161, 9.666e-5  
-0.162, 9.685e-5  
-0.163, 9.733e-5  
-0.164, 9.770e-5  
-0.165, 9.768e-5  
-0.166, 9.762e-5  
-0.167, 9.775e-5  
-0.168, 9.780e-5  
-0.169, 9.780e-5  
-0.170, 9.812e-5  
-0.171, 9.863e-5  
-0.172, 9.936e-5  
-0.173, 9.982e-5  
-0.174, 9.996e-5  
-0.175, 1.003e-4  
-0.176, 1.006e-4  
-0.177, 1.007e-4  
-0.178, 1.009e-4  
-0.179, 1.010e-4  
-0.180, 1.011e-4  
-0.181, 1.014e-4  
-0.182, 1.015e-4  
-0.183, 1.017e-4  
-0.184, 1.019e-4  
-0.185, 1.022e-4  
-0.186, 1.021e-4

-0.187, 1.024e-4  
-0.188, 1.025e-4  
-0.189, 1.026e-4  
-0.190, 1.030e-4  
-0.191, 1.031e-4  
-0.192, 1.029e-4  
-0.193, 1.029e-4  
-0.194, 1.033e-4  
-0.195, 1.039e-4  
-0.196, 1.043e-4  
-0.197, 1.046e-4  
-0.198, 1.048e-4  
-0.199, 1.051e-4  
-0.200, 1.054e-4  
-0.201, 1.059e-4  
-0.202, 1.062e-4  
-0.203, 1.063e-4  
-0.204, 1.064e-4  
-0.205, 1.068e-4  
-0.206, 1.071e-4  
-0.207, 1.076e-4  
-0.208, 1.078e-4  
-0.209, 1.080e-4  
-0.210, 1.084e-4  
-0.211, 1.085e-4  
-0.212, 1.083e-4  
-0.213, 1.084e-4  
-0.214, 1.090e-4  
-0.215, 1.094e-4  
-0.216, 1.096e-4  
-0.217, 1.098e-4  
-0.218, 1.099e-4  
-0.219, 1.102e-4  
-0.220, 1.103e-4  
-0.221, 1.105e-4  
-0.222, 1.105e-4  
-0.223, 1.109e-4  
-0.224, 1.110e-4  
-0.225, 1.111e-4  
-0.226, 1.115e-4  
-0.227, 1.119e-4  
-0.228, 1.121e-4  
-0.229, 1.127e-4  
-0.230, 1.129e-4  
-0.231, 1.129e-4  
-0.232, 1.128e-4  
-0.233, 1.130e-4  
-0.234, 1.133e-4  
-0.235, 1.140e-4  
-0.236, 1.143e-4



-0.237, 1.145e-4  
-0.238, 1.147e-4  
-0.239, 1.151e-4  
-0.240, 1.154e-4  
-0.241, 1.158e-4  
-0.242, 1.163e-4  
-0.243, 1.163e-4  
-0.244, 1.166e-4  
-0.245, 1.169e-4  
-0.246, 1.171e-4  
-0.247, 1.173e-4  
-0.248, 1.173e-4  
-0.249, 1.173e-4  
-0.250, 1.174e-4  
-0.251, 1.176e-4  
-0.252, 1.177e-4  
-0.253, 1.175e-4  
-0.254, 1.175e-4  
-0.255, 1.178e-4  
-0.256, 1.187e-4  
-0.257, 1.193e-4  
-0.258, 1.196e-4  
-0.259, 1.198e-4  
-0.260, 1.197e-4  
-0.261, 1.199e-4  
-0.262, 1.202e-4  
-0.263, 1.204e-4  
-0.264, 1.203e-4  
-0.265, 1.207e-4  
-0.266, 1.206e-4  
-0.267, 1.206e-4  
-0.268, 1.208e-4  
-0.269, 1.211e-4  
-0.270, 1.214e-4  
-0.271, 1.218e-4  
-0.272, 1.220e-4  
-0.273, 1.226e-4  
-0.274, 1.228e-4  
-0.275, 1.226e-4  
-0.276, 1.227e-4  
-0.277, 1.230e-4  
-0.278, 1.229e-4  
-0.279, 1.227e-4  
-0.280, 1.230e-4  
-0.281, 1.231e-4  
-0.282, 1.234e-4  
-0.283, 1.237e-4  
-0.284, 1.239e-4  
-0.285, 1.242e-4  
-0.286, 1.247e-4

-0.287, 1.249e-4  
-0.288, 1.249e-4  
-0.289, 1.252e-4  
-0.290, 1.248e-4  
-0.291, 1.249e-4  
-0.292, 1.255e-4  
-0.293, 1.258e-4  
-0.294, 1.256e-4  
-0.295, 1.254e-4  
-0.296, 1.253e-4  
-0.297, 1.253e-4  
-0.298, 1.254e-4  
-0.299, 1.253e-4  
-0.300, 1.257e-4  
-0.301, 1.264e-4  
-0.302, 1.268e-4  
-0.303, 1.267e-4  
-0.304, 1.267e-4  
-0.305, 1.270e-4  
-0.306, 1.271e-4  
-0.307, 1.270e-4  
-0.308, 1.270e-4  
-0.309, 1.271e-4  
-0.310, 1.273e-4  
-0.311, 1.274e-4  
-0.312, 1.276e-4  
-0.313, 1.278e-4  
-0.314, 1.281e-4  
-0.315, 1.284e-4  
-0.316, 1.284e-4  
-0.317, 1.283e-4  
-0.318, 1.281e-4  
-0.319, 1.280e-4  
-0.320, 1.279e-4  
-0.321, 1.279e-4  
-0.322, 1.277e-4  
-0.323, 1.277e-4  
-0.324, 1.277e-4  
-0.325, 1.283e-4  
-0.326, 1.287e-4  
-0.327, 1.286e-4  
-0.328, 1.286e-4  
-0.329, 1.286e-4  
-0.330, 1.285e-4  
-0.331, 1.287e-4  
-0.332, 1.290e-4  
-0.333, 1.292e-4  
-0.334, 1.291e-4  
-0.335, 1.294e-4  
-0.336, 1.294e-4

-0.337, 1.289e-4  
-0.338, 1.285e-4  
-0.339, 1.287e-4  
-0.340, 1.291e-4  
-0.341, 1.294e-4  
-0.342, 1.295e-4  
-0.343, 1.294e-4  
-0.344, 1.291e-4  
-0.345, 1.289e-4  
-0.346, 1.289e-4  
-0.347, 1.290e-4  
-0.348, 1.291e-4  
-0.349, 1.290e-4  
-0.350, 1.292e-4  
-0.351, 1.295e-4  
-0.352, 1.296e-4  
-0.353, 1.299e-4  
-0.354, 1.295e-4  
-0.355, 1.294e-4  
-0.356, 1.292e-4  
-0.357, 1.288e-4  
-0.358, 1.287e-4  
-0.359, 1.289e-4  
-0.360, 1.295e-4  
-0.361, 1.295e-4  
-0.362, 1.296e-4  
-0.363, 1.293e-4  
-0.364, 1.293e-4  
-0.365, 1.295e-4  
-0.366, 1.295e-4  
-0.367, 1.294e-4  
-0.368, 1.291e-4  
-0.369, 1.285e-4  
-0.370, 1.283e-4  
-0.371, 1.283e-4  
-0.372, 1.285e-4  
-0.373, 1.286e-4  
-0.374, 1.286e-4  
-0.375, 1.287e-4  
-0.376, 1.291e-4  
-0.377, 1.293e-4  
-0.378, 1.291e-4  
-0.379, 1.290e-4  
-0.380, 1.291e-4  
-0.381, 1.290e-4  
-0.382, 1.287e-4  
-0.383, 1.283e-4  
-0.384, 1.280e-4  
-0.385, 1.281e-4  
-0.386, 1.286e-4

-0.387, 1.287e-4  
-0.388, 1.287e-4  
-0.389, 1.284e-4  
-0.390, 1.279e-4  
-0.391, 1.278e-4  
-0.392, 1.279e-4  
-0.393, 1.279e-4  
-0.394, 1.281e-4  
-0.395, 1.280e-4  
-0.396, 1.277e-4  
-0.397, 1.277e-4  
-0.398, 1.277e-4  
-0.399, 1.276e-4

Mar. 30, 2021 04:04:03

Linear Sweep Voltammetry

File: c:\users\shadji04\desktop\sofia cv\30032021\complex 6 sweep experiment under n2\1500 rpm\_25 mv rate.txt

Data Source: Experiment

Instrument Model: CHI650E

Header:

Note: 1500 rpm

Init E (V) = 0.8

Final E (V) = -0.4

Scan Rate (V/s) = 0.025

Sample Interval (V) = 0.001

Quiet Time (sec) = 2

Sensitivity (A/V) = 0.001

Potential/V, Current/A

0.800, -1.452e-4  
0.799, -1.446e-4  
0.798, -1.442e-4  
0.797, -1.439e-4  
0.796, -1.436e-4  
0.795, -1.432e-4  
0.794, -1.428e-4  
0.793, -1.426e-4  
0.792, -1.423e-4  
0.791, -1.421e-4  
0.790, -1.418e-4  
0.789, -1.414e-4  
0.788, -1.411e-4  
0.787, -1.409e-4  
0.786, -1.406e-4  
0.785, -1.399e-4  
0.784, -1.396e-4  
0.783, -1.396e-4  
0.782, -1.395e-4  
0.781, -1.392e-4  
0.780, -1.386e-4  
0.779, -1.381e-4

0.778, -1.380e-4  
0.777, -1.375e-4  
0.776, -1.373e-4  
0.775, -1.372e-4  
0.774, -1.371e-4  
0.773, -1.369e-4  
0.772, -1.365e-4  
0.771, -1.363e-4  
0.770, -1.362e-4  
0.769, -1.358e-4  
0.768, -1.352e-4  
0.767, -1.345e-4  
0.766, -1.342e-4  
0.765, -1.341e-4  
0.764, -1.342e-4  
0.763, -1.341e-4  
0.762, -1.341e-4  
0.761, -1.341e-4  
0.760, -1.334e-4  
0.759, -1.331e-4  
0.758, -1.330e-4  
0.757, -1.327e-4  
0.756, -1.324e-4  
0.755, -1.322e-4  
0.754, -1.320e-4  
0.753, -1.315e-4  
0.752, -1.310e-4  
0.751, -1.309e-4  
0.750, -1.309e-4  
0.749, -1.304e-4  
0.748, -1.300e-4  
0.747, -1.299e-4  
0.746, -1.297e-4  
0.745, -1.296e-4  
0.744, -1.295e-4  
0.743, -1.292e-4  
0.742, -1.290e-4  
0.741, -1.287e-4  
0.740, -1.282e-4  
0.739, -1.281e-4  
0.738, -1.278e-4  
0.737, -1.272e-4  
0.736, -1.271e-4  
0.735, -1.271e-4  
0.734, -1.270e-4  
0.733, -1.268e-4  
0.732, -1.265e-4  
0.731, -1.260e-4  
0.730, -1.258e-4  
0.729, -1.257e-4

0.728, -1.252e-4  
0.727, -1.249e-4  
0.726, -1.248e-4  
0.725, -1.243e-4  
0.724, -1.235e-4  
0.723, -1.236e-4  
0.722, -1.238e-4  
0.721, -1.236e-4  
0.720, -1.233e-4  
0.719, -1.231e-4  
0.718, -1.229e-4  
0.717, -1.227e-4  
0.716, -1.225e-4  
0.715, -1.223e-4  
0.714, -1.220e-4  
0.713, -1.218e-4  
0.712, -1.216e-4  
0.711, -1.214e-4  
0.710, -1.213e-4  
0.709, -1.209e-4  
0.708, -1.204e-4  
0.707, -1.202e-4  
0.706, -1.201e-4  
0.705, -1.199e-4  
0.704, -1.197e-4  
0.703, -1.196e-4  
0.702, -1.193e-4  
0.701, -1.191e-4  
0.700, -1.187e-4  
0.699, -1.184e-4  
0.698, -1.182e-4  
0.697, -1.179e-4  
0.696, -1.176e-4  
0.695, -1.174e-4  
0.694, -1.172e-4  
0.693, -1.169e-4  
0.692, -1.167e-4  
0.691, -1.164e-4  
0.690, -1.162e-4  
0.689, -1.160e-4  
0.688, -1.158e-4  
0.687, -1.156e-4  
0.686, -1.154e-4  
0.685, -1.152e-4  
0.684, -1.149e-4  
0.683, -1.146e-4  
0.682, -1.143e-4  
0.681, -1.142e-4  
0.680, -1.141e-4  
0.679, -1.139e-4

0.678, -1.138e-4  
0.677, -1.134e-4  
0.676, -1.130e-4  
0.675, -1.128e-4  
0.674, -1.125e-4  
0.673, -1.122e-4  
0.672, -1.120e-4  
0.671, -1.117e-4  
0.670, -1.116e-4  
0.669, -1.114e-4  
0.668, -1.112e-4  
0.667, -1.110e-4  
0.666, -1.107e-4  
0.665, -1.105e-4  
0.664, -1.102e-4  
0.663, -1.100e-4  
0.662, -1.098e-4  
0.661, -1.096e-4  
0.660, -1.094e-4  
0.659, -1.091e-4  
0.658, -1.088e-4  
0.657, -1.086e-4  
0.656, -1.084e-4  
0.655, -1.081e-4  
0.654, -1.078e-4  
0.653, -1.076e-4  
0.652, -1.073e-4  
0.651, -1.070e-4  
0.650, -1.068e-4  
0.649, -1.067e-4  
0.648, -1.065e-4  
0.647, -1.063e-4  
0.646, -1.062e-4  
0.645, -1.060e-4  
0.644, -1.057e-4  
0.643, -1.055e-4  
0.642, -1.052e-4  
0.641, -1.049e-4  
0.640, -1.047e-4  
0.639, -1.045e-4  
0.638, -1.043e-4  
0.637, -1.041e-4  
0.636, -1.039e-4  
0.635, -1.037e-4  
0.634, -1.035e-4  
0.633, -1.033e-4  
0.632, -1.031e-4  
0.631, -1.028e-4  
0.630, -1.026e-4  
0.629, -1.023e-4

0.628, -1.020e-4  
0.627, -1.018e-4  
0.626, -1.017e-4  
0.625, -1.016e-4  
0.624, -1.013e-4  
0.623, -1.011e-4  
0.622, -1.010e-4  
0.621, -1.008e-4  
0.620, -1.007e-4  
0.619, -1.004e-4  
0.618, -1.001e-4  
0.617, -9.977e-5  
0.616, -9.953e-5  
0.615, -9.941e-5  
0.614, -9.921e-5  
0.613, -9.889e-5  
0.612, -9.872e-5  
0.611, -9.867e-5  
0.610, -9.841e-5  
0.609, -9.823e-5  
0.608, -9.809e-5  
0.607, -9.779e-5  
0.606, -9.746e-5  
0.605, -9.735e-5  
0.604, -9.720e-5  
0.603, -9.709e-5  
0.602, -9.691e-5  
0.601, -9.669e-5  
0.600, -9.648e-5  
0.599, -9.631e-5  
0.598, -9.620e-5  
0.597, -9.604e-5  
0.596, -9.580e-5  
0.595, -9.555e-5  
0.594, -9.540e-5  
0.593, -9.526e-5  
0.592, -9.509e-5  
0.591, -9.488e-5  
0.590, -9.483e-5  
0.589, -9.466e-5  
0.588, -9.423e-5  
0.587, -9.404e-5  
0.586, -9.397e-5  
0.585, -9.384e-5  
0.584, -9.362e-5  
0.583, -9.344e-5  
0.582, -9.325e-5  
0.581, -9.293e-5  
0.580, -9.265e-5  
0.579, -9.246e-5



0.578, -9.221e-5  
0.577, -9.211e-5  
0.576, -9.193e-5  
0.575, -9.175e-5  
0.574, -9.160e-5  
0.573, -9.148e-5  
0.572, -9.133e-5  
0.571, -9.112e-5  
0.570, -9.088e-5  
0.569, -9.060e-5  
0.568, -9.032e-5  
0.567, -9.010e-5  
0.566, -8.996e-5  
0.565, -8.983e-5  
0.564, -8.958e-5  
0.563, -8.938e-5  
0.562, -8.898e-5  
0.561, -8.862e-5  
0.560, -8.835e-5  
0.559, -8.812e-5  
0.558, -8.791e-5  
0.557, -8.775e-5  
0.556, -8.760e-5  
0.555, -8.745e-5  
0.554, -8.722e-5  
0.553, -8.696e-5  
0.552, -8.671e-5  
0.551, -8.649e-5  
0.550, -8.634e-5  
0.549, -8.610e-5  
0.548, -8.568e-5  
0.547, -8.531e-5  
0.546, -8.500e-5  
0.545, -8.470e-5  
0.544, -8.427e-5  
0.543, -8.378e-5  
0.542, -8.337e-5  
0.541, -8.316e-5  
0.540, -8.316e-5  
0.539, -8.311e-5  
0.538, -8.283e-5  
0.537, -8.255e-5  
0.536, -8.226e-5  
0.535, -8.193e-5  
0.534, -8.159e-5  
0.533, -8.134e-5  
0.532, -8.105e-5  
0.531, -8.075e-5  
0.530, -8.043e-5  
0.529, -8.010e-5

0.528, -7.972e-5  
0.527, -7.932e-5  
0.526, -7.896e-5  
0.525, -7.862e-5  
0.524, -7.824e-5  
0.523, -7.788e-5  
0.522, -7.764e-5  
0.521, -7.736e-5  
0.520, -7.706e-5  
0.519, -7.675e-5  
0.518, -7.630e-5  
0.517, -7.580e-5  
0.516, -7.546e-5  
0.515, -7.510e-5  
0.514, -7.465e-5  
0.513, -7.420e-5  
0.512, -7.376e-5  
0.511, -7.333e-5  
0.510, -7.291e-5  
0.509, -7.247e-5  
0.508, -7.204e-5  
0.507, -7.160e-5  
0.506, -7.123e-5  
0.505, -7.077e-5  
0.504, -7.015e-5  
0.503, -6.946e-5  
0.502, -6.893e-5  
0.501, -6.860e-5  
0.500, -6.832e-5  
0.499, -6.798e-5  
0.498, -6.750e-5  
0.497, -6.699e-5  
0.496, -6.652e-5  
0.495, -6.598e-5  
0.494, -6.534e-5  
0.493, -6.475e-5  
0.492, -6.429e-5  
0.491, -6.384e-5  
0.490, -6.332e-5  
0.489, -6.275e-5  
0.488, -6.225e-5  
0.487, -6.174e-5  
0.486, -6.119e-5  
0.485, -6.059e-5  
0.484, -6.001e-5  
0.483, -5.949e-5  
0.482, -5.900e-5  
0.481, -5.842e-5  
0.480, -5.784e-5  
0.479, -5.726e-5

0.478, -5.677e-5  
0.477, -5.614e-5  
0.476, -5.545e-5  
0.475, -5.483e-5  
0.474, -5.415e-5  
0.473, -5.356e-5  
0.472, -5.303e-5  
0.471, -5.251e-5  
0.470, -5.205e-5  
0.469, -5.148e-5  
0.468, -5.088e-5  
0.467, -5.028e-5  
0.466, -4.966e-5  
0.465, -4.908e-5  
0.464, -4.850e-5  
0.463, -4.788e-5  
0.462, -4.726e-5  
0.461, -4.671e-5  
0.460, -4.616e-5  
0.459, -4.555e-5  
0.458, -4.481e-5  
0.457, -4.411e-5  
0.456, -4.358e-5  
0.455, -4.306e-5  
0.454, -4.249e-5  
0.453, -4.189e-5  
0.452, -4.131e-5  
0.451, -4.078e-5  
0.450, -4.021e-5  
0.449, -3.964e-5  
0.448, -3.906e-5  
0.447, -3.854e-5  
0.446, -3.806e-5  
0.445, -3.754e-5  
0.444, -3.700e-5  
0.443, -3.652e-5  
0.442, -3.599e-5  
0.441, -3.543e-5  
0.440, -3.486e-5  
0.439, -3.430e-5  
0.438, -3.373e-5  
0.437, -3.320e-5  
0.436, -3.270e-5  
0.435, -3.221e-5  
0.434, -3.170e-5  
0.433, -3.122e-5  
0.432, -3.072e-5  
0.431, -3.024e-5  
0.430, -2.978e-5  
0.429, -2.929e-5

0.428, -2.879e-5  
0.427, -2.834e-5  
0.426, -2.792e-5  
0.425, -2.748e-5  
0.424, -2.705e-5  
0.423, -2.658e-5  
0.422, -2.614e-5  
0.421, -2.569e-5  
0.420, -2.524e-5  
0.419, -2.483e-5  
0.418, -2.444e-5  
0.417, -2.402e-5  
0.416, -2.358e-5  
0.415, -2.318e-5  
0.414, -2.277e-5  
0.413, -2.238e-5  
0.412, -2.195e-5  
0.411, -2.156e-5  
0.410, -2.118e-5  
0.409, -2.079e-5  
0.408, -2.042e-5  
0.407, -2.004e-5  
0.406, -1.970e-5  
0.405, -1.936e-5  
0.404, -1.902e-5  
0.403, -1.869e-5  
0.402, -1.835e-5  
0.401, -1.797e-5  
0.400, -1.760e-5  
0.399, -1.729e-5  
0.398, -1.700e-5  
0.397, -1.667e-5  
0.396, -1.637e-5  
0.395, -1.607e-5  
0.394, -1.578e-5  
0.393, -1.550e-5  
0.392, -1.521e-5  
0.391, -1.489e-5  
0.390, -1.460e-5  
0.389, -1.432e-5  
0.388, -1.403e-5  
0.387, -1.373e-5  
0.386, -1.346e-5  
0.385, -1.319e-5  
0.384, -1.294e-5  
0.383, -1.268e-5  
0.382, -1.241e-5  
0.381, -1.216e-5  
0.380, -1.189e-5  
0.379, -1.165e-5

0.378, -1.141e-5  
0.377, -1.119e-5  
0.376, -1.096e-5  
0.375, -1.071e-5  
0.374, -1.047e-5  
0.373, -1.024e-5  
0.372, -1.001e-5  
0.371, -9.790e-6  
0.370, -9.556e-6  
0.369, -9.347e-6  
0.368, -9.137e-6  
0.367, -8.934e-6  
0.366, -8.731e-6  
0.365, -8.523e-6  
0.364, -8.310e-6  
0.363, -8.119e-6  
0.362, -7.934e-6  
0.361, -7.734e-6  
0.360, -7.529e-6  
0.359, -7.339e-6  
0.358, -7.157e-6  
0.357, -6.984e-6  
0.356, -6.827e-6  
0.355, -6.647e-6  
0.354, -6.479e-6  
0.353, -6.291e-6  
0.352, -6.103e-6  
0.351, -5.950e-6  
0.350, -5.800e-6  
0.349, -5.645e-6  
0.348, -5.479e-6  
0.347, -5.327e-6  
0.346, -5.151e-6  
0.345, -4.980e-6  
0.344, -4.848e-6  
0.343, -4.708e-6  
0.342, -4.560e-6  
0.341, -4.415e-6  
0.340, -4.262e-6  
0.339, -4.119e-6  
0.338, -3.996e-6  
0.337, -3.868e-6  
0.336, -3.739e-6  
0.335, -3.575e-6  
0.334, -3.432e-6  
0.333, -3.307e-6  
0.332, -3.174e-6  
0.331, -3.068e-6  
0.330, -2.958e-6  
0.329, -2.819e-6

0.328, -2.691e-6  
0.327, -2.539e-6  
0.326, -2.414e-6  
0.325, -2.313e-6  
0.324, -2.201e-6  
0.323, -2.081e-6  
0.322, -1.965e-6  
0.321, -1.860e-6  
0.320, -1.736e-6  
0.319, -1.607e-6  
0.318, -1.505e-6  
0.317, -1.410e-6  
0.316, -1.304e-6  
0.315, -1.203e-6  
0.314, -1.091e-6  
0.313, -9.800e-7  
0.312, -8.789e-7  
0.311, -7.767e-7  
0.310, -6.490e-7  
0.309, -5.458e-7  
0.308, -4.554e-7  
0.307, -3.651e-7  
0.306, -2.757e-7  
0.305, -1.715e-7  
0.304, -7.427e-8  
0.303, 1.808e-8  
0.302, 1.193e-7  
0.301, 2.303e-7  
0.300, 3.256e-7  
0.299, 4.091e-7  
0.298, 4.985e-7  
0.297, 6.056e-7  
0.296, 7.008e-7  
0.295, 7.834e-7  
0.294, 8.875e-7  
0.293, 9.759e-7  
0.292, 1.056e-6  
0.291, 1.142e-6  
0.290, 1.251e-6  
0.289, 1.354e-6  
0.288, 1.432e-6  
0.287, 1.526e-6  
0.286, 1.601e-6  
0.285, 1.682e-6  
0.284, 1.781e-6  
0.283, 1.863e-6  
0.282, 1.959e-6  
0.281, 2.043e-6  
0.280, 2.138e-6  
0.279, 2.217e-6

0.278, 2.339e-6  
0.277, 2.417e-6  
0.276, 2.497e-6  
0.275, 2.584e-6  
0.274, 2.694e-6  
0.273, 2.772e-6  
0.272, 2.872e-6  
0.271, 2.973e-6  
0.270, 3.038e-6  
0.269, 3.123e-6  
0.268, 3.214e-6  
0.267, 3.308e-6  
0.266, 3.425e-6  
0.265, 3.508e-6  
0.264, 3.585e-6  
0.263, 3.678e-6  
0.262, 3.780e-6  
0.261, 3.854e-6  
0.260, 3.945e-6  
0.259, 4.037e-6  
0.258, 4.119e-6  
0.257, 4.218e-6  
0.256, 4.313e-6  
0.255, 4.401e-6  
0.254, 4.502e-6  
0.253, 4.610e-6  
0.252, 4.694e-6  
0.251, 4.787e-6  
0.250, 4.874e-6  
0.249, 4.977e-6  
0.248, 5.063e-6  
0.247, 5.179e-6  
0.246, 5.284e-6  
0.245, 5.368e-6  
0.244, 5.470e-6  
0.243, 5.598e-6  
0.242, 5.683e-6  
0.241, 5.764e-6  
0.240, 5.840e-6  
0.239, 5.926e-6  
0.238, 6.035e-6  
0.237, 6.131e-6  
0.236, 6.250e-6  
0.235, 6.340e-6  
0.234, 6.470e-6  
0.233, 6.564e-6  
0.232, 6.663e-6  
0.231, 6.767e-6  
0.230, 6.841e-6  
0.229, 6.934e-6

0.228, 7.036e-6  
0.227, 7.133e-6  
0.226, 7.256e-6  
0.225, 7.360e-6  
0.224, 7.438e-6  
0.223, 7.545e-6  
0.222, 7.643e-6  
0.221, 7.746e-6  
0.220, 7.869e-6  
0.219, 7.984e-6  
0.218, 8.109e-6  
0.217, 8.208e-6  
0.216, 8.303e-6  
0.215, 8.406e-6  
0.214, 8.497e-6  
0.213, 8.598e-6  
0.212, 8.707e-6  
0.211, 8.824e-6  
0.210, 8.933e-6  
0.209, 9.057e-6  
0.208, 9.156e-6  
0.207, 9.280e-6  
0.206, 9.392e-6  
0.205, 9.518e-6  
0.204, 9.624e-6  
0.203, 9.717e-6  
0.202, 9.847e-6  
0.201, 9.975e-6  
0.200, 1.007e-5  
0.199, 1.020e-5  
0.198, 1.033e-5  
0.197, 1.044e-5  
0.196, 1.055e-5  
0.195, 1.068e-5  
0.194, 1.080e-5  
0.193, 1.087e-5  
0.192, 1.099e-5  
0.191, 1.113e-5  
0.190, 1.124e-5  
0.189, 1.137e-5  
0.188, 1.150e-5  
0.187, 1.163e-5  
0.186, 1.174e-5  
0.185, 1.186e-5  
0.184, 1.198e-5  
0.183, 1.210e-5  
0.182, 1.223e-5  
0.181, 1.235e-5  
0.180, 1.249e-5  
0.179, 1.264e-5



0.178, 1.277e-5  
0.177, 1.289e-5  
0.176, 1.301e-5  
0.175, 1.314e-5  
0.174, 1.327e-5  
0.173, 1.340e-5  
0.172, 1.355e-5  
0.171, 1.368e-5  
0.170, 1.380e-5  
0.169, 1.395e-5  
0.168, 1.408e-5  
0.167, 1.421e-5  
0.166, 1.433e-5  
0.165, 1.444e-5  
0.164, 1.461e-5  
0.163, 1.478e-5  
0.162, 1.493e-5  
0.161, 1.510e-5  
0.160, 1.525e-5  
0.159, 1.541e-5  
0.158, 1.557e-5  
0.157, 1.577e-5  
0.156, 1.595e-5  
0.155, 1.609e-5  
0.154, 1.627e-5  
0.153, 1.645e-5  
0.152, 1.665e-5  
0.151, 1.683e-5  
0.150, 1.697e-5  
0.149, 1.713e-5  
0.148, 1.732e-5  
0.147, 1.750e-5  
0.146, 1.769e-5  
0.145, 1.788e-5  
0.144, 1.808e-5  
0.143, 1.829e-5  
0.142, 1.849e-5  
0.141, 1.870e-5  
0.140, 1.895e-5  
0.139, 1.917e-5  
0.138, 1.937e-5  
0.137, 1.956e-5  
0.136, 1.978e-5  
0.135, 2.005e-5  
0.134, 2.031e-5  
0.133, 2.055e-5  
0.132, 2.074e-5  
0.131, 2.099e-5  
0.130, 2.124e-5  
0.129, 2.146e-5

0.128, 2.168e-5  
0.127, 2.192e-5  
0.126, 2.216e-5  
0.125, 2.242e-5  
0.124, 2.272e-5  
0.123, 2.304e-5  
0.122, 2.334e-5  
0.121, 2.364e-5  
0.120, 2.390e-5  
0.119, 2.418e-5  
0.118, 2.446e-5  
0.117, 2.476e-5  
0.116, 2.507e-5  
0.115, 2.540e-5  
0.114, 2.572e-5  
0.113, 2.605e-5  
0.112, 2.635e-5  
0.111, 2.663e-5  
0.110, 2.697e-5  
0.109, 2.731e-5  
0.108, 2.769e-5  
0.107, 2.807e-5  
0.106, 2.846e-5  
0.105, 2.883e-5  
0.104, 2.927e-5  
0.103, 2.969e-5  
0.102, 3.008e-5  
0.101, 3.047e-5  
0.100, 3.083e-5  
0.099, 3.118e-5  
0.098, 3.152e-5  
0.097, 3.193e-5  
0.096, 3.232e-5  
0.095, 3.271e-5  
0.094, 3.311e-5  
0.093, 3.354e-5  
0.092, 3.400e-5  
0.091, 3.444e-5  
0.090, 3.485e-5  
0.089, 3.525e-5  
0.088, 3.564e-5  
0.087, 3.607e-5  
0.086, 3.652e-5  
0.085, 3.694e-5  
0.084, 3.736e-5  
0.083, 3.777e-5  
0.082, 3.824e-5  
0.081, 3.871e-5  
0.080, 3.916e-5  
0.079, 3.962e-5

0.078, 4.004e-5  
0.077, 4.044e-5  
0.076, 4.087e-5  
0.075, 4.128e-5  
0.074, 4.172e-5  
0.073, 4.217e-5  
0.072, 4.260e-5  
0.071, 4.304e-5  
0.070, 4.350e-5  
0.069, 4.393e-5  
0.068, 4.435e-5  
0.067, 4.482e-5  
0.066, 4.528e-5  
0.065, 4.571e-5  
0.064, 4.622e-5  
0.063, 4.668e-5  
0.062, 4.711e-5  
0.061, 4.754e-5  
0.060, 4.799e-5  
0.059, 4.839e-5  
0.058, 4.873e-5  
0.057, 4.915e-5  
0.056, 4.958e-5  
0.055, 4.998e-5  
0.054, 5.041e-5  
0.053, 5.088e-5  
0.052, 5.131e-5  
0.051, 5.165e-5  
0.050, 5.204e-5  
0.049, 5.246e-5  
0.048, 5.289e-5  
0.047, 5.330e-5  
0.046, 5.368e-5  
0.045, 5.407e-5  
0.044, 5.451e-5  
0.043, 5.488e-5  
0.042, 5.524e-5  
0.041, 5.563e-5  
0.040, 5.599e-5  
0.039, 5.636e-5  
0.038, 5.677e-5  
0.037, 5.716e-5  
0.036, 5.753e-5  
0.035, 5.787e-5  
0.034, 5.818e-5  
0.033, 5.851e-5  
0.032, 5.887e-5  
0.031, 5.925e-5  
0.030, 5.962e-5  
0.029, 5.989e-5

0.028, 6.008e-5  
0.027, 6.033e-5  
0.026, 6.080e-5  
0.025, 6.130e-5  
0.024, 6.167e-5  
0.023, 6.202e-5  
0.022, 6.229e-5  
0.021, 6.259e-5  
0.020, 6.293e-5  
0.019, 6.326e-5  
0.018, 6.355e-5  
0.017, 6.376e-5  
0.016, 6.410e-5  
0.015, 6.458e-5  
0.014, 6.496e-5  
0.013, 6.528e-5  
0.012, 6.561e-5  
0.011, 6.591e-5  
0.010, 6.620e-5  
0.009, 6.648e-5  
0.008, 6.676e-5  
0.007, 6.704e-5  
0.006, 6.735e-5  
0.005, 6.771e-5  
0.004, 6.806e-5  
0.003, 6.840e-5  
0.002, 6.864e-5  
0.001, 6.903e-5  
0.000, 6.928e-5  
-0.001, 6.944e-5  
-0.002, 6.962e-5  
-0.003, 6.989e-5  
-0.004, 7.022e-5  
-0.005, 7.049e-5  
-0.006, 7.082e-5  
-0.007, 7.110e-5  
-0.008, 7.127e-5  
-0.009, 7.144e-5  
-0.010, 7.177e-5  
-0.011, 7.216e-5  
-0.012, 7.250e-5  
-0.013, 7.292e-5  
-0.014, 7.328e-5  
-0.015, 7.350e-5  
-0.016, 7.374e-5  
-0.017, 7.405e-5  
-0.018, 7.439e-5  
-0.019, 7.467e-5  
-0.020, 7.490e-5  
-0.021, 7.514e-5

-0.022, 7.541e-5  
-0.023, 7.569e-5  
-0.024, 7.595e-5  
-0.025, 7.621e-5  
-0.026, 7.646e-5  
-0.027, 7.674e-5  
-0.028, 7.706e-5  
-0.029, 7.739e-5  
-0.030, 7.768e-5  
-0.031, 7.798e-5  
-0.032, 7.828e-5  
-0.033, 7.851e-5  
-0.034, 7.878e-5  
-0.035, 7.903e-5  
-0.036, 7.935e-5  
-0.037, 7.973e-5  
-0.038, 8.008e-5  
-0.039, 8.040e-5  
-0.040, 8.056e-5  
-0.041, 8.076e-5  
-0.042, 8.099e-5  
-0.043, 8.130e-5  
-0.044, 8.158e-5  
-0.045, 8.183e-5  
-0.046, 8.209e-5  
-0.047, 8.235e-5  
-0.048, 8.262e-5  
-0.049, 8.293e-5  
-0.050, 8.321e-5  
-0.051, 8.349e-5  
-0.052, 8.382e-5  
-0.053, 8.414e-5  
-0.054, 8.443e-5  
-0.055, 8.470e-5  
-0.056, 8.504e-5  
-0.057, 8.539e-5  
-0.058, 8.567e-5  
-0.059, 8.591e-5  
-0.060, 8.611e-5  
-0.061, 8.622e-5  
-0.062, 8.642e-5  
-0.063, 8.644e-5  
-0.064, 8.667e-5  
-0.065, 8.709e-5  
-0.066, 8.749e-5  
-0.067, 8.786e-5  
-0.068, 8.825e-5  
-0.069, 8.855e-5  
-0.070, 8.884e-5  
-0.071, 8.914e-5

-0.072, 8.926e-5  
-0.073, 8.953e-5  
-0.074, 8.986e-5  
-0.075, 9.011e-5  
-0.076, 9.034e-5  
-0.077, 9.058e-5  
-0.078, 9.085e-5  
-0.079, 9.113e-5  
-0.080, 9.142e-5  
-0.081, 9.175e-5  
-0.082, 9.203e-5  
-0.083, 9.238e-5  
-0.084, 9.269e-5  
-0.085, 9.267e-5  
-0.086, 9.249e-5  
-0.087, 9.242e-5  
-0.088, 9.282e-5  
-0.089, 9.360e-5  
-0.090, 9.426e-5  
-0.091, 9.464e-5  
-0.092, 9.484e-5  
-0.093, 9.505e-5  
-0.094, 9.532e-5  
-0.095, 9.555e-5  
-0.096, 9.583e-5  
-0.097, 9.621e-5  
-0.098, 9.657e-5  
-0.099, 9.680e-5  
-0.100, 9.701e-5  
-0.101, 9.724e-5  
-0.102, 9.760e-5  
-0.103, 9.787e-5  
-0.104, 9.814e-5  
-0.105, 9.845e-5  
-0.106, 9.884e-5  
-0.107, 9.918e-5  
-0.108, 9.948e-5  
-0.109, 9.972e-5  
-0.110, 9.995e-5  
-0.111, 9.993e-5  
-0.112, 1.001e-4  
-0.113, 1.007e-4  
-0.114, 1.010e-4  
-0.115, 1.013e-4  
-0.116, 1.015e-4  
-0.117, 1.016e-4  
-0.118, 1.017e-4  
-0.119, 1.020e-4  
-0.120, 1.026e-4  
-0.121, 1.031e-4

-0.122, 1.034e-4  
-0.123, 1.036e-4  
-0.124, 1.036e-4  
-0.125, 1.040e-4  
-0.126, 1.046e-4  
-0.127, 1.049e-4  
-0.128, 1.050e-4  
-0.129, 1.052e-4  
-0.130, 1.056e-4  
-0.131, 1.059e-4  
-0.132, 1.061e-4  
-0.133, 1.064e-4  
-0.134, 1.068e-4  
-0.135, 1.070e-4  
-0.136, 1.072e-4  
-0.137, 1.075e-4  
-0.138, 1.078e-4  
-0.139, 1.081e-4  
-0.140, 1.083e-4  
-0.141, 1.085e-4  
-0.142, 1.087e-4  
-0.143, 1.089e-4  
-0.144, 1.090e-4  
-0.145, 1.092e-4  
-0.146, 1.095e-4  
-0.147, 1.099e-4  
-0.148, 1.103e-4  
-0.149, 1.107e-4  
-0.150, 1.110e-4  
-0.151, 1.113e-4  
-0.152, 1.116e-4  
-0.153, 1.118e-4  
-0.154, 1.120e-4  
-0.155, 1.123e-4  
-0.156, 1.127e-4  
-0.157, 1.129e-4  
-0.158, 1.132e-4  
-0.159, 1.134e-4  
-0.160, 1.138e-4  
-0.161, 1.141e-4  
-0.162, 1.144e-4  
-0.163, 1.146e-4  
-0.164, 1.147e-4  
-0.165, 1.150e-4  
-0.166, 1.154e-4  
-0.167, 1.156e-4  
-0.168, 1.159e-4  
-0.169, 1.161e-4  
-0.170, 1.164e-4  
-0.171, 1.167e-4

-0.172, 1.169e-4  
-0.173, 1.173e-4  
-0.174, 1.176e-4  
-0.175, 1.178e-4  
-0.176, 1.180e-4  
-0.177, 1.183e-4  
-0.178, 1.186e-4  
-0.179, 1.189e-4  
-0.180, 1.193e-4  
-0.181, 1.196e-4  
-0.182, 1.197e-4  
-0.183, 1.198e-4  
-0.184, 1.200e-4  
-0.185, 1.204e-4  
-0.186, 1.208e-4  
-0.187, 1.212e-4  
-0.188, 1.216e-4  
-0.189, 1.218e-4  
-0.190, 1.221e-4  
-0.191, 1.223e-4  
-0.192, 1.225e-4  
-0.193, 1.229e-4  
-0.194, 1.231e-4  
-0.195, 1.234e-4  
-0.196, 1.238e-4  
-0.197, 1.241e-4  
-0.198, 1.244e-4  
-0.199, 1.248e-4  
-0.200, 1.251e-4  
-0.201, 1.254e-4  
-0.202, 1.255e-4  
-0.203, 1.255e-4  
-0.204, 1.254e-4  
-0.205, 1.256e-4  
-0.206, 1.261e-4  
-0.207, 1.263e-4  
-0.208, 1.267e-4  
-0.209, 1.272e-4  
-0.210, 1.276e-4  
-0.211, 1.281e-4  
-0.212, 1.285e-4  
-0.213, 1.285e-4  
-0.214, 1.289e-4  
-0.215, 1.294e-4  
-0.216, 1.298e-4  
-0.217, 1.300e-4  
-0.218, 1.303e-4  
-0.219, 1.308e-4  
-0.220, 1.310e-4  
-0.221, 1.308e-4



-0.222, 1.309e-4  
-0.223, 1.313e-4  
-0.224, 1.316e-4  
-0.225, 1.319e-4  
-0.226, 1.322e-4  
-0.227, 1.326e-4  
-0.228, 1.331e-4  
-0.229, 1.335e-4  
-0.230, 1.338e-4  
-0.231, 1.341e-4  
-0.232, 1.342e-4  
-0.233, 1.346e-4  
-0.234, 1.348e-4  
-0.235, 1.350e-4  
-0.236, 1.352e-4  
-0.237, 1.355e-4  
-0.238, 1.357e-4  
-0.239, 1.359e-4  
-0.240, 1.362e-4  
-0.241, 1.365e-4  
-0.242, 1.369e-4  
-0.243, 1.372e-4  
-0.244, 1.376e-4  
-0.245, 1.378e-4  
-0.246, 1.379e-4  
-0.247, 1.381e-4  
-0.248, 1.384e-4  
-0.249, 1.388e-4  
-0.250, 1.390e-4  
-0.251, 1.394e-4  
-0.252, 1.397e-4  
-0.253, 1.400e-4  
-0.254, 1.402e-4  
-0.255, 1.404e-4  
-0.256, 1.406e-4  
-0.257, 1.408e-4  
-0.258, 1.409e-4  
-0.259, 1.412e-4  
-0.260, 1.416e-4  
-0.261, 1.418e-4  
-0.262, 1.421e-4  
-0.263, 1.425e-4  
-0.264, 1.428e-4  
-0.265, 1.430e-4  
-0.266, 1.430e-4  
-0.267, 1.431e-4  
-0.268, 1.432e-4  
-0.269, 1.434e-4  
-0.270, 1.436e-4  
-0.271, 1.440e-4

-0.272, 1.442e-4  
-0.273, 1.444e-4  
-0.274, 1.447e-4  
-0.275, 1.449e-4  
-0.276, 1.450e-4  
-0.277, 1.451e-4  
-0.278, 1.451e-4  
-0.279, 1.453e-4  
-0.280, 1.456e-4  
-0.281, 1.459e-4  
-0.282, 1.460e-4  
-0.283, 1.460e-4  
-0.284, 1.460e-4  
-0.285, 1.461e-4  
-0.286, 1.464e-4  
-0.287, 1.466e-4  
-0.288, 1.466e-4  
-0.289, 1.467e-4  
-0.290, 1.468e-4  
-0.291, 1.470e-4  
-0.292, 1.473e-4  
-0.293, 1.475e-4  
-0.294, 1.474e-4  
-0.295, 1.474e-4  
-0.296, 1.472e-4  
-0.297, 1.473e-4  
-0.298, 1.479e-4  
-0.299, 1.482e-4  
-0.300, 1.484e-4  
-0.301, 1.488e-4  
-0.302, 1.488e-4  
-0.303, 1.488e-4  
-0.304, 1.489e-4  
-0.305, 1.489e-4  
-0.306, 1.490e-4  
-0.307, 1.494e-4  
-0.308, 1.496e-4  
-0.309, 1.497e-4  
-0.310, 1.497e-4  
-0.311, 1.498e-4  
-0.312, 1.498e-4  
-0.313, 1.497e-4  
-0.314, 1.497e-4  
-0.315, 1.498e-4  
-0.316, 1.500e-4  
-0.317, 1.501e-4  
-0.318, 1.504e-4  
-0.319, 1.504e-4  
-0.320, 1.504e-4  
-0.321, 1.504e-4

-0.322, 1.505e-4  
-0.323, 1.505e-4  
-0.324, 1.505e-4  
-0.325, 1.504e-4  
-0.326, 1.505e-4  
-0.327, 1.507e-4  
-0.328, 1.508e-4  
-0.329, 1.509e-4  
-0.330, 1.511e-4  
-0.331, 1.511e-4  
-0.332, 1.510e-4  
-0.333, 1.509e-4  
-0.334, 1.507e-4  
-0.335, 1.506e-4  
-0.336, 1.509e-4  
-0.337, 1.511e-4  
-0.338, 1.510e-4  
-0.339, 1.511e-4  
-0.340, 1.512e-4  
-0.341, 1.513e-4  
-0.342, 1.513e-4  
-0.343, 1.512e-4  
-0.344, 1.512e-4  
-0.345, 1.510e-4  
-0.346, 1.508e-4  
-0.347, 1.509e-4  
-0.348, 1.512e-4  
-0.349, 1.515e-4  
-0.350, 1.515e-4  
-0.351, 1.514e-4  
-0.352, 1.513e-4  
-0.353, 1.513e-4  
-0.354, 1.513e-4  
-0.355, 1.513e-4  
-0.356, 1.512e-4  
-0.357, 1.511e-4  
-0.358, 1.511e-4  
-0.359, 1.511e-4  
-0.360, 1.510e-4  
-0.361, 1.508e-4  
-0.362, 1.507e-4  
-0.363, 1.507e-4  
-0.364, 1.506e-4  
-0.365, 1.505e-4  
-0.366, 1.504e-4  
-0.367, 1.502e-4  
-0.368, 1.503e-4  
-0.369, 1.503e-4  
-0.370, 1.504e-4  
-0.371, 1.505e-4

-0.372, 1.504e-4  
-0.373, 1.502e-4  
-0.374, 1.500e-4  
-0.375, 1.498e-4  
-0.376, 1.498e-4  
-0.377, 1.500e-4  
-0.378, 1.501e-4  
-0.379, 1.500e-4  
-0.380, 1.499e-4  
-0.381, 1.497e-4  
-0.382, 1.496e-4  
-0.383, 1.495e-4  
-0.384, 1.494e-4  
-0.385, 1.492e-4  
-0.386, 1.492e-4  
-0.387, 1.492e-4  
-0.388, 1.489e-4  
-0.389, 1.486e-4  
-0.390, 1.487e-4  
-0.391, 1.487e-4  
-0.392, 1.486e-4  
-0.393, 1.485e-4  
-0.394, 1.483e-4  
-0.395, 1.482e-4  
-0.396, 1.480e-4  
-0.397, 1.478e-4  
-0.398, 1.477e-4  
-0.399, 1.476e-4

**Table S4.** RDE data of compound **1** at pH=4.9 under O<sub>2</sub>. Potentials vs Ag/AgCl.

Mar. 30, 2021 03:28:07

Linear Sweep Voltammetry

File: c:\users\shadji04\desktop\sofia cv\30032021\complex 6 sweep experiment inder o2\100 rpm\_25 mv rate.txt

Data Source: Experiment

Instrument Model: CHI650E

Header:

Note: 100 rpm

Init E (V) = 0.8

Final E (V) = -0.4

Scan Rate (V/s) = 0.025

Sample Interval (V) = 0.001

Quiet Time (sec) = 2

Sensitivity (A/V) = 0.001

Potential/V, Current/A

0.800, -4.296e-5

0.799, -4.264e-5

0.798, -4.238e-5

0.797, -4.218e-5

0.796, -4.200e-5

0.795, -4.181e-5

0.794, -4.164e-5

0.793, -4.148e-5

0.792, -4.133e-5

0.791, -4.118e-5

0.790, -4.099e-5

0.789, -4.085e-5

0.788, -4.073e-5

0.787, -4.061e-5

0.786, -4.049e-5

0.785, -4.034e-5

0.784, -4.023e-5

0.783, -4.012e-5

0.782, -4.000e-5

0.781, -3.990e-5

0.780, -3.981e-5

0.779, -3.971e-5

0.778, -3.963e-5

0.777, -3.956e-5

0.776, -3.946e-5

0.775, -3.937e-5

0.774, -3.928e-5

0.773, -3.920e-5

0.772, -3.910e-5

0.771, -3.902e-5

0.770, -3.893e-5

0.769, -3.885e-5

0.768, -3.877e-5  
0.767, -3.869e-5  
0.766, -3.864e-5  
0.765, -3.857e-5  
0.764, -3.850e-5  
0.763, -3.845e-5  
0.762, -3.838e-5  
0.761, -3.830e-5  
0.760, -3.826e-5  
0.759, -3.819e-5  
0.758, -3.813e-5  
0.757, -3.804e-5  
0.756, -3.800e-5  
0.755, -3.794e-5  
0.754, -3.788e-5  
0.753, -3.782e-5  
0.752, -3.777e-5  
0.751, -3.771e-5  
0.750, -3.765e-5  
0.749, -3.760e-5  
0.748, -3.754e-5  
0.747, -3.750e-5  
0.746, -3.744e-5  
0.745, -3.738e-5  
0.744, -3.732e-5  
0.743, -3.726e-5  
0.742, -3.718e-5  
0.741, -3.714e-5  
0.740, -3.707e-5  
0.739, -3.701e-5  
0.738, -3.694e-5  
0.737, -3.690e-5  
0.736, -3.685e-5  
0.735, -3.679e-5  
0.734, -3.676e-5  
0.733, -3.671e-5  
0.732, -3.666e-5  
0.731, -3.661e-5  
0.730, -3.654e-5  
0.729, -3.649e-5  
0.728, -3.644e-5  
0.727, -3.637e-5  
0.726, -3.632e-5  
0.725, -3.626e-5  
0.724, -3.618e-5  
0.723, -3.610e-5  
0.722, -3.607e-5  
0.721, -3.603e-5  
0.720, -3.599e-5  
0.719, -3.594e-5

0.718, -3.588e-5  
0.717, -3.583e-5  
0.716, -3.577e-5  
0.715, -3.571e-5  
0.714, -3.566e-5  
0.713, -3.558e-5  
0.712, -3.551e-5  
0.711, -3.546e-5  
0.710, -3.540e-5  
0.709, -3.535e-5  
0.708, -3.528e-5  
0.707, -3.525e-5  
0.706, -3.520e-5  
0.705, -3.514e-5  
0.704, -3.509e-5  
0.703, -3.503e-5  
0.702, -3.498e-5  
0.701, -3.493e-5  
0.700, -3.485e-5  
0.699, -3.478e-5  
0.698, -3.472e-5  
0.697, -3.466e-5  
0.696, -3.461e-5  
0.695, -3.455e-5  
0.694, -3.448e-5  
0.693, -3.442e-5  
0.692, -3.434e-5  
0.691, -3.428e-5  
0.690, -3.423e-5  
0.689, -3.418e-5  
0.688, -3.411e-5  
0.687, -3.405e-5  
0.686, -3.399e-5  
0.685, -3.392e-5  
0.684, -3.384e-5  
0.683, -3.377e-5  
0.682, -3.369e-5  
0.681, -3.361e-5  
0.680, -3.354e-5  
0.679, -3.347e-5  
0.678, -3.340e-5  
0.677, -3.333e-5  
0.676, -3.326e-5  
0.675, -3.320e-5  
0.674, -3.314e-5  
0.673, -3.307e-5  
0.672, -3.300e-5  
0.671, -3.293e-5  
0.670, -3.284e-5  
0.669, -3.277e-5

0.668, -3.268e-5  
0.667, -3.259e-5  
0.666, -3.251e-5  
0.665, -3.242e-5  
0.664, -3.233e-5  
0.663, -3.226e-5  
0.662, -3.219e-5  
0.661, -3.210e-5  
0.660, -3.202e-5  
0.659, -3.195e-5  
0.658, -3.187e-5  
0.657, -3.179e-5  
0.656, -3.170e-5  
0.655, -3.162e-5  
0.654, -3.154e-5  
0.653, -3.145e-5  
0.652, -3.136e-5  
0.651, -3.126e-5  
0.650, -3.119e-5  
0.649, -3.108e-5  
0.648, -3.103e-5  
0.647, -3.094e-5  
0.646, -3.085e-5  
0.645, -3.077e-5  
0.644, -3.069e-5  
0.643, -3.062e-5  
0.642, -3.053e-5  
0.641, -3.045e-5  
0.640, -3.037e-5  
0.639, -3.026e-5  
0.638, -3.018e-5  
0.637, -3.012e-5  
0.636, -3.002e-5  
0.635, -2.995e-5  
0.634, -2.984e-5  
0.633, -2.978e-5  
0.632, -2.969e-5  
0.631, -2.961e-5  
0.630, -2.954e-5  
0.629, -2.945e-5  
0.628, -2.937e-5  
0.627, -2.929e-5  
0.626, -2.920e-5  
0.625, -2.914e-5  
0.624, -2.906e-5  
0.623, -2.897e-5  
0.622, -2.890e-5  
0.621, -2.882e-5  
0.620, -2.874e-5  
0.619, -2.866e-5



0.618, -2.860e-5  
0.617, -2.853e-5  
0.616, -2.845e-5  
0.615, -2.836e-5  
0.614, -2.828e-5  
0.613, -2.822e-5  
0.612, -2.815e-5  
0.611, -2.807e-5  
0.610, -2.799e-5  
0.609, -2.791e-5  
0.608, -2.787e-5  
0.607, -2.780e-5  
0.606, -2.771e-5  
0.605, -2.765e-5  
0.604, -2.758e-5  
0.603, -2.753e-5  
0.602, -2.747e-5  
0.601, -2.739e-5  
0.600, -2.735e-5  
0.599, -2.728e-5  
0.598, -2.721e-5  
0.597, -2.714e-5  
0.596, -2.705e-5  
0.595, -2.700e-5  
0.594, -2.694e-5  
0.593, -2.686e-5  
0.592, -2.679e-5  
0.591, -2.670e-5  
0.590, -2.664e-5  
0.589, -2.658e-5  
0.588, -2.652e-5  
0.587, -2.646e-5  
0.586, -2.638e-5  
0.585, -2.631e-5  
0.584, -2.626e-5  
0.583, -2.617e-5  
0.582, -2.609e-5  
0.581, -2.604e-5  
0.580, -2.597e-5  
0.579, -2.592e-5  
0.578, -2.585e-5  
0.577, -2.575e-5  
0.576, -2.569e-5  
0.575, -2.561e-5  
0.574, -2.555e-5  
0.573, -2.550e-5  
0.572, -2.542e-5  
0.571, -2.534e-5  
0.570, -2.528e-5  
0.569, -2.520e-5

0.568, -2.509e-5  
0.567, -2.502e-5  
0.566, -2.496e-5  
0.565, -2.489e-5  
0.564, -2.480e-5  
0.563, -2.470e-5  
0.562, -2.462e-5  
0.561, -2.454e-5  
0.560, -2.445e-5  
0.559, -2.436e-5  
0.558, -2.429e-5  
0.557, -2.420e-5  
0.556, -2.412e-5  
0.555, -2.404e-5  
0.554, -2.393e-5  
0.553, -2.385e-5  
0.552, -2.377e-5  
0.551, -2.367e-5  
0.550, -2.358e-5  
0.549, -2.346e-5  
0.548, -2.338e-5  
0.547, -2.328e-5  
0.546, -2.318e-5  
0.545, -2.305e-5  
0.544, -2.297e-5  
0.543, -2.287e-5  
0.542, -2.274e-5  
0.541, -2.263e-5  
0.540, -2.254e-5  
0.539, -2.245e-5  
0.538, -2.234e-5  
0.537, -2.221e-5  
0.536, -2.209e-5  
0.535, -2.197e-5  
0.534, -2.186e-5  
0.533, -2.171e-5  
0.532, -2.157e-5  
0.531, -2.146e-5  
0.530, -2.133e-5  
0.529, -2.121e-5  
0.528, -2.108e-5  
0.527, -2.095e-5  
0.526, -2.084e-5  
0.525, -2.071e-5  
0.524, -2.057e-5  
0.523, -2.043e-5  
0.522, -2.029e-5  
0.521, -2.013e-5  
0.520, -2.000e-5  
0.519, -1.986e-5

0.518, -1.970e-5  
0.517, -1.954e-5  
0.516, -1.939e-5  
0.515, -1.924e-5  
0.514, -1.910e-5  
0.513, -1.894e-5  
0.512, -1.878e-5  
0.511, -1.863e-5  
0.510, -1.850e-5  
0.509, -1.832e-5  
0.508, -1.817e-5  
0.507, -1.799e-5  
0.506, -1.782e-5  
0.505, -1.765e-5  
0.504, -1.749e-5  
0.503, -1.734e-5  
0.502, -1.716e-5  
0.501, -1.699e-5  
0.500, -1.679e-5  
0.499, -1.663e-5  
0.498, -1.646e-5  
0.497, -1.625e-5  
0.496, -1.609e-5  
0.495, -1.593e-5  
0.494, -1.575e-5  
0.493, -1.558e-5  
0.492, -1.540e-5  
0.491, -1.523e-5  
0.490, -1.503e-5  
0.489, -1.483e-5  
0.488, -1.462e-5  
0.487, -1.443e-5  
0.486, -1.423e-5  
0.485, -1.402e-5  
0.484, -1.383e-5  
0.483, -1.365e-5  
0.482, -1.346e-5  
0.481, -1.327e-5  
0.480, -1.307e-5  
0.479, -1.289e-5  
0.478, -1.269e-5  
0.477, -1.249e-5  
0.476, -1.229e-5  
0.475, -1.209e-5  
0.474, -1.187e-5  
0.473, -1.167e-5  
0.472, -1.149e-5  
0.471, -1.129e-5  
0.470, -1.111e-5  
0.469, -1.094e-5

0.468, -1.075e-5  
0.467, -1.056e-5  
0.466, -1.036e-5  
0.465, -1.016e-5  
0.464, -9.984e-6  
0.463, -9.777e-6  
0.462, -9.603e-6  
0.461, -9.418e-6  
0.460, -9.226e-6  
0.459, -9.066e-6  
0.458, -8.891e-6  
0.457, -8.726e-6  
0.456, -8.547e-6  
0.455, -8.354e-6  
0.454, -8.201e-6  
0.453, -8.030e-6  
0.452, -7.866e-6  
0.451, -7.716e-6  
0.450, -7.549e-6  
0.449, -7.390e-6  
0.448, -7.243e-6  
0.447, -7.083e-6  
0.446, -6.955e-6  
0.445, -6.810e-6  
0.444, -6.658e-6  
0.443, -6.523e-6  
0.442, -6.379e-6  
0.441, -6.247e-6  
0.440, -6.116e-6  
0.439, -5.983e-6  
0.438, -5.857e-6  
0.437, -5.725e-6  
0.436, -5.588e-6  
0.435, -5.479e-6  
0.434, -5.365e-6  
0.433, -5.244e-6  
0.432, -5.128e-6  
0.431, -5.016e-6  
0.430, -4.915e-6  
0.429, -4.814e-6  
0.428, -4.720e-6  
0.427, -4.611e-6  
0.426, -4.505e-6  
0.425, -4.405e-6  
0.424, -4.314e-6  
0.423, -4.219e-6  
0.422, -4.129e-6  
0.421, -4.029e-6  
0.420, -3.911e-6  
0.419, -3.845e-6

0.418, -3.771e-6  
0.417, -3.687e-6  
0.416, -3.609e-6  
0.415, -3.517e-6  
0.414, -3.437e-6  
0.413, -3.366e-6  
0.412, -3.281e-6  
0.411, -3.193e-6  
0.410, -3.112e-6  
0.409, -3.026e-6  
0.408, -2.955e-6  
0.407, -2.879e-6  
0.406, -2.824e-6  
0.405, -2.767e-6  
0.404, -2.694e-6  
0.403, -2.627e-6  
0.402, -2.554e-6  
0.401, -2.481e-6  
0.400, -2.415e-6  
0.399, -2.350e-6  
0.398, -2.291e-6  
0.397, -2.183e-6  
0.396, -2.129e-6  
0.395, -2.082e-6  
0.394, -2.038e-6  
0.393, -1.960e-6  
0.392, -1.905e-6  
0.391, -1.830e-6  
0.390, -1.764e-6  
0.389, -1.695e-6  
0.388, -1.628e-6  
0.387, -1.574e-6  
0.386, -1.523e-6  
0.385, -1.471e-6  
0.384, -1.418e-6  
0.383, -1.338e-6  
0.382, -1.282e-6  
0.381, -1.229e-6  
0.380, -1.183e-6  
0.379, -1.111e-6  
0.378, -1.066e-6  
0.377, -1.025e-6  
0.376, -9.781e-7  
0.375, -9.280e-7  
0.374, -8.710e-7  
0.373, -7.777e-7  
0.372, -7.443e-7  
0.371, -7.060e-7  
0.370, -6.519e-7  
0.369, -6.195e-7

0.368, -5.684e-7  
0.367, -5.134e-7  
0.366, -4.545e-7  
0.365, -4.004e-7  
0.364, -3.513e-7  
0.363, -3.100e-7  
0.362, -2.727e-7  
0.361, -2.334e-7  
0.360, -1.715e-7  
0.359, -1.106e-7  
0.358, -7.231e-8  
0.357, -3.497e-8  
0.356, 3.340e-9  
0.355, 5.050e-8  
0.354, 9.274e-8  
0.353, 1.458e-7  
0.352, 1.880e-7  
0.351, 2.263e-7  
0.350, 2.696e-7  
0.349, 3.079e-7  
0.348, 3.550e-7  
0.347, 3.894e-7  
0.346, 4.366e-7  
0.345, 4.759e-7  
0.344, 5.201e-7  
0.343, 5.535e-7  
0.342, 6.016e-7  
0.341, 6.547e-7  
0.340, 6.989e-7  
0.339, 7.293e-7  
0.338, 7.618e-7  
0.337, 7.991e-7  
0.336, 8.345e-7  
0.335, 8.796e-7  
0.334, 9.248e-7  
0.333, 9.612e-7  
0.332, 1.010e-6  
0.331, 1.044e-6  
0.330, 1.073e-6  
0.329, 1.108e-6  
0.328, 1.145e-6  
0.327, 1.203e-6  
0.326, 1.222e-6  
0.325, 1.268e-6  
0.324, 1.297e-6  
0.323, 1.333e-6  
0.322, 1.374e-6  
0.321, 1.407e-6  
0.320, 1.461e-6  
0.319, 1.477e-6

0.318, 1.521e-6  
0.317, 1.561e-6  
0.316, 1.581e-6  
0.315, 1.637e-6  
0.314, 1.669e-6  
0.313, 1.688e-6  
0.312, 1.716e-6  
0.311, 1.756e-6  
0.310, 1.789e-6  
0.309, 1.804e-6  
0.308, 1.839e-6  
0.307, 1.867e-6  
0.306, 1.907e-6  
0.305, 1.967e-6  
0.304, 1.992e-6  
0.303, 2.009e-6  
0.302, 2.048e-6  
0.301, 2.101e-6  
0.300, 2.153e-6  
0.299, 2.175e-6  
0.298, 2.194e-6  
0.297, 2.225e-6  
0.296, 2.253e-6  
0.295, 2.288e-6  
0.294, 2.317e-6  
0.293, 2.347e-6  
0.292, 2.391e-6  
0.291, 2.422e-6  
0.290, 2.460e-6  
0.289, 2.516e-6  
0.288, 2.554e-6  
0.287, 2.595e-6  
0.286, 2.627e-6  
0.285, 2.669e-6  
0.284, 2.708e-6  
0.283, 2.723e-6  
0.282, 2.751e-6  
0.281, 2.784e-6  
0.280, 2.825e-6  
0.279, 2.883e-6  
0.278, 2.897e-6  
0.277, 2.922e-6  
0.276, 2.983e-6  
0.275, 3.023e-6  
0.274, 3.063e-6  
0.273, 3.109e-6  
0.272, 3.125e-6  
0.271, 3.152e-6  
0.270, 3.205e-6  
0.269, 3.228e-6

0.268, 3.265e-6  
0.267, 3.290e-6  
0.266, 3.325e-6  
0.265, 3.377e-6  
0.264, 3.417e-6  
0.263, 3.456e-6  
0.262, 3.485e-6  
0.261, 3.528e-6  
0.260, 3.567e-6  
0.259, 3.597e-6  
0.258, 3.636e-6  
0.257, 3.690e-6  
0.256, 3.737e-6  
0.255, 3.783e-6  
0.254, 3.813e-6  
0.253, 3.850e-6  
0.252, 3.883e-6  
0.251, 3.914e-6  
0.250, 3.950e-6  
0.249, 3.992e-6  
0.248, 4.040e-6  
0.247, 4.078e-6  
0.246, 4.148e-6  
0.245, 4.185e-6  
0.244, 4.217e-6  
0.243, 4.252e-6  
0.242, 4.275e-6  
0.241, 4.318e-6  
0.240, 4.347e-6  
0.239, 4.387e-6  
0.238, 4.429e-6  
0.237, 4.475e-6  
0.236, 4.517e-6  
0.235, 4.557e-6  
0.234, 4.594e-6  
0.233, 4.630e-6  
0.232, 4.676e-6  
0.231, 4.725e-6  
0.230, 4.766e-6  
0.229, 4.825e-6  
0.228, 4.859e-6  
0.227, 4.897e-6  
0.226, 4.948e-6  
0.225, 4.990e-6  
0.224, 5.062e-6  
0.223, 5.103e-6  
0.222, 5.136e-6  
0.221, 5.162e-6  
0.220, 5.204e-6  
0.219, 5.244e-6



0.218, 5.285e-6  
0.217, 5.346e-6  
0.216, 5.389e-6  
0.215, 5.445e-6  
0.214, 5.482e-6  
0.213, 5.526e-6  
0.212, 5.574e-6  
0.211, 5.626e-6  
0.210, 5.679e-6  
0.209, 5.749e-6  
0.208, 5.815e-6  
0.207, 5.837e-6  
0.206, 5.885e-6  
0.205, 5.931e-6  
0.204, 5.994e-6  
0.203, 6.014e-6  
0.202, 6.050e-6  
0.201, 6.097e-6  
0.200, 6.161e-6  
0.199, 6.233e-6  
0.198, 6.254e-6  
0.197, 6.286e-6  
0.196, 6.334e-6  
0.195, 6.387e-6  
0.194, 6.434e-6  
0.193, 6.488e-6  
0.192, 6.537e-6  
0.191, 6.592e-6  
0.190, 6.640e-6  
0.189, 6.687e-6  
0.188, 6.743e-6  
0.187, 6.793e-6  
0.186, 6.837e-6  
0.185, 6.894e-6  
0.184, 6.949e-6  
0.183, 7.002e-6  
0.182, 7.058e-6  
0.181, 7.109e-6  
0.180, 7.168e-6  
0.179, 7.222e-6  
0.178, 7.277e-6  
0.177, 7.336e-6  
0.176, 7.388e-6  
0.175, 7.455e-6  
0.174, 7.534e-6  
0.173, 7.587e-6  
0.172, 7.647e-6  
0.171, 7.694e-6  
0.170, 7.780e-6  
0.169, 7.834e-6

0.168, 7.918e-6  
0.167, 7.962e-6  
0.166, 8.012e-6  
0.165, 8.077e-6  
0.164, 8.139e-6  
0.163, 8.203e-6  
0.162, 8.260e-6  
0.161, 8.319e-6  
0.160, 8.384e-6  
0.159, 8.458e-6  
0.158, 8.519e-6  
0.157, 8.597e-6  
0.156, 8.674e-6  
0.155, 8.750e-6  
0.154, 8.827e-6  
0.153, 8.910e-6  
0.152, 8.980e-6  
0.151, 9.050e-6  
0.150, 9.151e-6  
0.149, 9.226e-6  
0.148, 9.310e-6  
0.147, 9.389e-6  
0.146, 9.460e-6  
0.145, 9.547e-6  
0.144, 9.645e-6  
0.143, 9.757e-6  
0.142, 9.818e-6  
0.141, 9.912e-6  
0.140, 1.000e-5  
0.139, 1.008e-5  
0.138, 1.017e-5  
0.137, 1.027e-5  
0.136, 1.037e-5  
0.135, 1.047e-5  
0.134, 1.056e-5  
0.133, 1.066e-5  
0.132, 1.075e-5  
0.131, 1.085e-5  
0.130, 1.096e-5  
0.129, 1.108e-5  
0.128, 1.119e-5  
0.127, 1.131e-5  
0.126, 1.144e-5  
0.125, 1.155e-5  
0.124, 1.166e-5  
0.123, 1.176e-5  
0.122, 1.190e-5  
0.121, 1.202e-5  
0.120, 1.214e-5  
0.119, 1.224e-5

0.118, 1.236e-5  
0.117, 1.248e-5  
0.116, 1.261e-5  
0.115, 1.274e-5  
0.114, 1.286e-5  
0.113, 1.303e-5  
0.112, 1.315e-5  
0.111, 1.328e-5  
0.110, 1.342e-5  
0.109, 1.357e-5  
0.108, 1.372e-5  
0.107, 1.384e-5  
0.106, 1.399e-5  
0.105, 1.413e-5  
0.104, 1.426e-5  
0.103, 1.441e-5  
0.102, 1.455e-5  
0.101, 1.473e-5  
0.100, 1.489e-5  
0.099, 1.503e-5  
0.098, 1.519e-5  
0.097, 1.536e-5  
0.096, 1.551e-5  
0.095, 1.567e-5  
0.094, 1.585e-5  
0.093, 1.601e-5  
0.092, 1.619e-5  
0.091, 1.634e-5  
0.090, 1.652e-5  
0.089, 1.667e-5  
0.088, 1.685e-5  
0.087, 1.704e-5  
0.086, 1.721e-5  
0.085, 1.737e-5  
0.084, 1.757e-5  
0.083, 1.775e-5  
0.082, 1.792e-5  
0.081, 1.810e-5  
0.080, 1.826e-5  
0.079, 1.846e-5  
0.078, 1.862e-5  
0.077, 1.880e-5  
0.076, 1.897e-5  
0.075, 1.917e-5  
0.074, 1.935e-5  
0.073, 1.952e-5  
0.072, 1.969e-5  
0.071, 1.987e-5  
0.070, 2.005e-5  
0.069, 2.024e-5

0.068, 2.044e-5  
0.067, 2.060e-5  
0.066, 2.081e-5  
0.065, 2.099e-5  
0.064, 2.116e-5  
0.063, 2.133e-5  
0.062, 2.151e-5  
0.061, 2.169e-5  
0.060, 2.186e-5  
0.059, 2.204e-5  
0.058, 2.220e-5  
0.057, 2.238e-5  
0.056, 2.254e-5  
0.055, 2.272e-5  
0.054, 2.291e-5  
0.053, 2.313e-5  
0.052, 2.329e-5  
0.051, 2.347e-5  
0.050, 2.365e-5  
0.049, 2.385e-5  
0.048, 2.402e-5  
0.047, 2.419e-5  
0.046, 2.436e-5  
0.045, 2.454e-5  
0.044, 2.473e-5  
0.043, 2.491e-5  
0.042, 2.508e-5  
0.041, 2.524e-5  
0.040, 2.541e-5  
0.039, 2.560e-5  
0.038, 2.577e-5  
0.037, 2.593e-5  
0.036, 2.611e-5  
0.035, 2.628e-5  
0.034, 2.645e-5  
0.033, 2.663e-5  
0.032, 2.680e-5  
0.031, 2.697e-5  
0.030, 2.712e-5  
0.029, 2.728e-5  
0.028, 2.746e-5  
0.027, 2.762e-5  
0.026, 2.781e-5  
0.025, 2.796e-5  
0.024, 2.812e-5  
0.023, 2.829e-5  
0.022, 2.846e-5  
0.021, 2.863e-5  
0.020, 2.880e-5  
0.019, 2.897e-5

0.018, 2.913e-5  
0.017, 2.929e-5  
0.016, 2.948e-5  
0.015, 2.964e-5  
0.014, 2.979e-5  
0.013, 2.995e-5  
0.012, 3.011e-5  
0.011, 3.028e-5  
0.010, 3.044e-5  
0.009, 3.062e-5  
0.008, 3.079e-5  
0.007, 3.097e-5  
0.006, 3.114e-5  
0.005, 3.129e-5  
0.004, 3.145e-5  
0.003, 3.161e-5  
0.002, 3.180e-5  
0.001, 3.196e-5  
0.000, 3.214e-5  
-0.001, 3.231e-5  
-0.002, 3.246e-5  
-0.003, 3.263e-5  
-0.004, 3.279e-5  
-0.005, 3.296e-5  
-0.006, 3.315e-5  
-0.007, 3.332e-5  
-0.008, 3.349e-5  
-0.009, 3.368e-5  
-0.010, 3.384e-5  
-0.011, 3.401e-5  
-0.012, 3.417e-5  
-0.013, 3.435e-5  
-0.014, 3.452e-5  
-0.015, 3.469e-5  
-0.016, 3.488e-5  
-0.017, 3.503e-5  
-0.018, 3.519e-5  
-0.019, 3.535e-5  
-0.020, 3.553e-5  
-0.021, 3.570e-5  
-0.022, 3.587e-5  
-0.023, 3.608e-5  
-0.024, 3.626e-5  
-0.025, 3.646e-5  
-0.026, 3.667e-5  
-0.027, 3.686e-5  
-0.028, 3.702e-5  
-0.029, 3.718e-5  
-0.030, 3.737e-5  
-0.031, 3.755e-5

-0.032, 3.775e-5  
-0.033, 3.795e-5  
-0.034, 3.811e-5  
-0.035, 3.832e-5  
-0.036, 3.854e-5  
-0.037, 3.873e-5  
-0.038, 3.896e-5  
-0.039, 3.916e-5  
-0.040, 3.934e-5  
-0.041, 3.957e-5  
-0.042, 3.975e-5  
-0.043, 3.993e-5  
-0.044, 4.011e-5  
-0.045, 4.031e-5  
-0.046, 4.052e-5  
-0.047, 4.077e-5  
-0.048, 4.095e-5  
-0.049, 4.111e-5  
-0.050, 4.135e-5  
-0.051, 4.156e-5  
-0.052, 4.175e-5  
-0.053, 4.200e-5  
-0.054, 4.221e-5  
-0.055, 4.241e-5  
-0.056, 4.265e-5  
-0.057, 4.285e-5  
-0.058, 4.306e-5  
-0.059, 4.325e-5  
-0.060, 4.347e-5  
-0.061, 4.370e-5  
-0.062, 4.391e-5  
-0.063, 4.414e-5  
-0.064, 4.435e-5  
-0.065, 4.460e-5  
-0.066, 4.482e-5  
-0.067, 4.507e-5  
-0.068, 4.531e-5  
-0.069, 4.552e-5  
-0.070, 4.574e-5  
-0.071, 4.597e-5  
-0.072, 4.619e-5  
-0.073, 4.644e-5  
-0.074, 4.669e-5  
-0.075, 4.693e-5  
-0.076, 4.716e-5  
-0.077, 4.740e-5  
-0.078, 4.764e-5  
-0.079, 4.784e-5  
-0.080, 4.810e-5  
-0.081, 4.833e-5

-0.082, 4.859e-5  
-0.083, 4.885e-5  
-0.084, 4.911e-5  
-0.085, 4.938e-5  
-0.086, 4.961e-5  
-0.087, 4.984e-5  
-0.088, 5.011e-5  
-0.089, 5.033e-5  
-0.090, 5.056e-5  
-0.091, 5.080e-5  
-0.092, 5.108e-5  
-0.093, 5.132e-5  
-0.094, 5.158e-5  
-0.095, 5.187e-5  
-0.096, 5.214e-5  
-0.097, 5.241e-5  
-0.098, 5.269e-5  
-0.099, 5.294e-5  
-0.100, 5.321e-5  
-0.101, 5.345e-5  
-0.102, 5.370e-5  
-0.103, 5.396e-5  
-0.104, 5.420e-5  
-0.105, 5.446e-5  
-0.106, 5.470e-5  
-0.107, 5.497e-5  
-0.108, 5.522e-5  
-0.109, 5.550e-5  
-0.110, 5.579e-5  
-0.111, 5.605e-5  
-0.112, 5.633e-5  
-0.113, 5.660e-5  
-0.114, 5.685e-5  
-0.115, 5.713e-5  
-0.116, 5.739e-5  
-0.117, 5.764e-5  
-0.118, 5.791e-5  
-0.119, 5.819e-5  
-0.120, 5.845e-5  
-0.121, 5.872e-5  
-0.122, 5.899e-5  
-0.123, 5.923e-5  
-0.124, 5.953e-5  
-0.125, 5.983e-5  
-0.126, 6.012e-5  
-0.127, 6.040e-5  
-0.128, 6.068e-5  
-0.129, 6.097e-5  
-0.130, 6.122e-5  
-0.131, 6.145e-5

-0.132, 6.172e-5  
-0.133, 6.199e-5  
-0.134, 6.227e-5  
-0.135, 6.252e-5  
-0.136, 6.278e-5  
-0.137, 6.305e-5  
-0.138, 6.328e-5  
-0.139, 6.360e-5  
-0.140, 6.389e-5  
-0.141, 6.416e-5  
-0.142, 6.447e-5  
-0.143, 6.478e-5  
-0.144, 6.505e-5  
-0.145, 6.534e-5  
-0.146, 6.559e-5  
-0.147, 6.588e-5  
-0.148, 6.615e-5  
-0.149, 6.643e-5  
-0.150, 6.669e-5  
-0.151, 6.698e-5  
-0.152, 6.725e-5  
-0.153, 6.748e-5  
-0.154, 6.779e-5  
-0.155, 6.805e-5  
-0.156, 6.832e-5  
-0.157, 6.860e-5  
-0.158, 6.887e-5  
-0.159, 6.914e-5  
-0.160, 6.942e-5  
-0.161, 6.967e-5  
-0.162, 6.996e-5  
-0.163, 7.021e-5  
-0.164, 7.048e-5  
-0.165, 7.075e-5  
-0.166, 7.105e-5  
-0.167, 7.131e-5  
-0.168, 7.154e-5  
-0.169, 7.188e-5  
-0.170, 7.212e-5  
-0.171, 7.238e-5  
-0.172, 7.267e-5  
-0.173, 7.294e-5  
-0.174, 7.319e-5  
-0.175, 7.347e-5  
-0.176, 7.373e-5  
-0.177, 7.401e-5  
-0.178, 7.428e-5  
-0.179, 7.456e-5  
-0.180, 7.481e-5  
-0.181, 7.509e-5



-0.182, 7.535e-5  
-0.183, 7.560e-5  
-0.184, 7.590e-5  
-0.185, 7.614e-5  
-0.186, 7.642e-5  
-0.187, 7.672e-5  
-0.188, 7.699e-5  
-0.189, 7.725e-5  
-0.190, 7.748e-5  
-0.191, 7.769e-5  
-0.192, 7.795e-5  
-0.193, 7.820e-5  
-0.194, 7.849e-5  
-0.195, 7.871e-5  
-0.196, 7.897e-5  
-0.197, 7.920e-5  
-0.198, 7.945e-5  
-0.199, 7.974e-5  
-0.200, 7.996e-5  
-0.201, 8.023e-5  
-0.202, 8.050e-5  
-0.203, 8.075e-5  
-0.204, 8.102e-5  
-0.205, 8.126e-5  
-0.206, 8.150e-5  
-0.207, 8.173e-5  
-0.208, 8.194e-5  
-0.209, 8.218e-5  
-0.210, 8.240e-5  
-0.211, 8.264e-5  
-0.212, 8.283e-5  
-0.213, 8.312e-5  
-0.214, 8.339e-5  
-0.215, 8.359e-5  
-0.216, 8.388e-5  
-0.217, 8.415e-5  
-0.218, 8.437e-5  
-0.219, 8.462e-5  
-0.220, 8.482e-5  
-0.221, 8.506e-5  
-0.222, 8.524e-5  
-0.223, 8.546e-5  
-0.224, 8.567e-5  
-0.225, 8.589e-5  
-0.226, 8.611e-5  
-0.227, 8.628e-5  
-0.228, 8.658e-5  
-0.229, 8.683e-5  
-0.230, 8.705e-5  
-0.231, 8.736e-5

-0.232, 8.760e-5  
-0.233, 8.781e-5  
-0.234, 8.804e-5  
-0.235, 8.822e-5  
-0.236, 8.846e-5  
-0.237, 8.867e-5  
-0.238, 8.888e-5  
-0.239, 8.906e-5  
-0.240, 8.925e-5  
-0.241, 8.943e-5  
-0.242, 8.958e-5  
-0.243, 8.983e-5  
-0.244, 9.006e-5  
-0.245, 9.028e-5  
-0.246, 9.052e-5  
-0.247, 9.076e-5  
-0.248, 9.097e-5  
-0.249, 9.122e-5  
-0.250, 9.140e-5  
-0.251, 9.161e-5  
-0.252, 9.178e-5  
-0.253, 9.198e-5  
-0.254, 9.217e-5  
-0.255, 9.240e-5  
-0.256, 9.258e-5  
-0.257, 9.273e-5  
-0.258, 9.299e-5  
-0.259, 9.320e-5  
-0.260, 9.338e-5  
-0.261, 9.362e-5  
-0.262, 9.382e-5  
-0.263, 9.402e-5  
-0.264, 9.422e-5  
-0.265, 9.441e-5  
-0.266, 9.461e-5  
-0.267, 9.475e-5  
-0.268, 9.495e-5  
-0.269, 9.512e-5  
-0.270, 9.533e-5  
-0.271, 9.552e-5  
-0.272, 9.568e-5  
-0.273, 9.596e-5  
-0.274, 9.617e-5  
-0.275, 9.642e-5  
-0.276, 9.665e-5  
-0.277, 9.685e-5  
-0.278, 9.706e-5  
-0.279, 9.725e-5  
-0.280, 9.745e-5  
-0.281, 9.766e-5

-0.282, 9.780e-5  
-0.283, 9.802e-5  
-0.284, 9.818e-5  
-0.285, 9.838e-5  
-0.286, 9.858e-5  
-0.287, 9.879e-5  
-0.288, 9.903e-5  
-0.289, 9.920e-5  
-0.290, 9.940e-5  
-0.291, 9.962e-5  
-0.292, 9.978e-5  
-0.293, 9.995e-5  
-0.294, 1.001e-4  
-0.295, 1.003e-4  
-0.296, 1.004e-4  
-0.297, 1.006e-4  
-0.298, 1.008e-4  
-0.299, 1.010e-4  
-0.300, 1.012e-4  
-0.301, 1.013e-4  
-0.302, 1.016e-4  
-0.303, 1.018e-4  
-0.304, 1.020e-4  
-0.305, 1.022e-4  
-0.306, 1.025e-4  
-0.307, 1.027e-4  
-0.308, 1.029e-4  
-0.309, 1.031e-4  
-0.310, 1.032e-4  
-0.311, 1.034e-4  
-0.312, 1.036e-4  
-0.313, 1.038e-4  
-0.314, 1.040e-4  
-0.315, 1.042e-4  
-0.316, 1.043e-4  
-0.317, 1.046e-4  
-0.318, 1.048e-4  
-0.319, 1.050e-4  
-0.320, 1.052e-4  
-0.321, 1.055e-4  
-0.322, 1.057e-4  
-0.323, 1.059e-4  
-0.324, 1.060e-4  
-0.325, 1.062e-4  
-0.326, 1.064e-4  
-0.327, 1.065e-4  
-0.328, 1.067e-4  
-0.329, 1.069e-4  
-0.330, 1.070e-4  
-0.331, 1.072e-4

-0.332, 1.075e-4  
-0.333, 1.077e-4  
-0.334, 1.079e-4  
-0.335, 1.081e-4  
-0.336, 1.083e-4  
-0.337, 1.084e-4  
-0.338, 1.087e-4  
-0.339, 1.088e-4  
-0.340, 1.090e-4  
-0.341, 1.091e-4  
-0.342, 1.093e-4  
-0.343, 1.094e-4  
-0.344, 1.096e-4  
-0.345, 1.097e-4  
-0.346, 1.099e-4  
-0.347, 1.101e-4  
-0.348, 1.103e-4  
-0.349, 1.105e-4  
-0.350, 1.107e-4  
-0.351, 1.108e-4  
-0.352, 1.110e-4  
-0.353, 1.112e-4  
-0.354, 1.113e-4  
-0.355, 1.115e-4  
-0.356, 1.116e-4  
-0.357, 1.117e-4  
-0.358, 1.118e-4  
-0.359, 1.120e-4  
-0.360, 1.121e-4  
-0.361, 1.122e-4  
-0.362, 1.125e-4  
-0.363, 1.126e-4  
-0.364, 1.127e-4  
-0.365, 1.129e-4  
-0.366, 1.131e-4  
-0.367, 1.132e-4  
-0.368, 1.133e-4  
-0.369, 1.134e-4  
-0.370, 1.135e-4  
-0.371, 1.136e-4  
-0.372, 1.137e-4  
-0.373, 1.138e-4  
-0.374, 1.140e-4  
-0.375, 1.141e-4  
-0.376, 1.143e-4  
-0.377, 1.145e-4  
-0.378, 1.146e-4  
-0.379, 1.147e-4  
-0.380, 1.149e-4  
-0.381, 1.150e-4

-0.382, 1.151e-4  
-0.383, 1.152e-4  
-0.384, 1.153e-4  
-0.385, 1.153e-4  
-0.386, 1.154e-4  
-0.387, 1.155e-4  
-0.388, 1.156e-4  
-0.389, 1.157e-4  
-0.390, 1.159e-4  
-0.391, 1.160e-4  
-0.392, 1.162e-4  
-0.393, 1.164e-4  
-0.394, 1.165e-4  
-0.395, 1.167e-4  
-0.396, 1.168e-4  
-0.397, 1.169e-4  
-0.398, 1.170e-4  
-0.399, 1.170e-4

Mar. 30, 2021 03:30:31

Linear Sweep Voltammetry

File: c:\users\shadji04\desktop\sofia cv\30032021\complex 6 sweep experiment inder  
o2\300 rpm\_25 mv rate.txt

Data Source: Experiment

Instrument Model: CHI650E

Header:

Note: 300 rpm

Init E (V) = 0.8

Final E (V) = -0.4

Scan Rate (V/s) = 0.025

Sample Interval (V) = 0.001

Quiet Time (sec) = 2

Sensitivity (A/V) = 0.001

Potential/V, Current/A

0.800, -6.830e-5

0.799, -6.795e-5

0.798, -6.766e-5

0.797, -6.743e-5

0.796, -6.726e-5

0.795, -6.707e-5

0.794, -6.689e-5

0.793, -6.667e-5

0.792, -6.651e-5

0.791, -6.637e-5

0.790, -6.620e-5

0.789, -6.603e-5

0.788, -6.588e-5

0.787, -6.573e-5

0.786, -6.562e-5

0.785, -6.549e-5

0.784, -6.533e-5

0.783, -6.517e-5  
0.782, -6.503e-5  
0.781, -6.494e-5  
0.780, -6.483e-5  
0.779, -6.472e-5  
0.778, -6.458e-5  
0.777, -6.445e-5  
0.776, -6.434e-5  
0.775, -6.424e-5  
0.774, -6.414e-5  
0.773, -6.399e-5  
0.772, -6.387e-5  
0.771, -6.379e-5  
0.770, -6.365e-5  
0.769, -6.356e-5  
0.768, -6.343e-5  
0.767, -6.332e-5  
0.766, -6.324e-5  
0.765, -6.313e-5  
0.764, -6.301e-5  
0.763, -6.288e-5  
0.762, -6.276e-5  
0.761, -6.267e-5  
0.760, -6.256e-5  
0.759, -6.245e-5  
0.758, -6.232e-5  
0.757, -6.222e-5  
0.756, -6.213e-5  
0.755, -6.203e-5  
0.754, -6.192e-5  
0.753, -6.180e-5  
0.752, -6.170e-5  
0.751, -6.163e-5  
0.750, -6.152e-5  
0.749, -6.144e-5  
0.748, -6.133e-5  
0.747, -6.124e-5  
0.746, -6.122e-5  
0.745, -6.111e-5  
0.744, -6.102e-5  
0.743, -6.090e-5  
0.742, -6.080e-5  
0.741, -6.071e-5  
0.740, -6.060e-5  
0.739, -6.049e-5  
0.738, -6.037e-5  
0.737, -6.027e-5  
0.736, -6.018e-5  
0.735, -6.009e-5  
0.734, -5.998e-5

0.733, -5.987e-5  
0.732, -5.978e-5  
0.731, -5.968e-5  
0.730, -5.956e-5  
0.729, -5.946e-5  
0.728, -5.937e-5  
0.727, -5.929e-5  
0.726, -5.922e-5  
0.725, -5.911e-5  
0.724, -5.901e-5  
0.723, -5.890e-5  
0.722, -5.880e-5  
0.721, -5.871e-5  
0.720, -5.862e-5  
0.719, -5.853e-5  
0.718, -5.843e-5  
0.717, -5.833e-5  
0.716, -5.825e-5  
0.715, -5.810e-5  
0.714, -5.799e-5  
0.713, -5.788e-5  
0.712, -5.782e-5  
0.711, -5.773e-5  
0.710, -5.763e-5  
0.709, -5.754e-5  
0.708, -5.743e-5  
0.707, -5.734e-5  
0.706, -5.726e-5  
0.705, -5.715e-5  
0.704, -5.705e-5  
0.703, -5.694e-5  
0.702, -5.686e-5  
0.701, -5.679e-5  
0.700, -5.668e-5  
0.699, -5.658e-5  
0.698, -5.647e-5  
0.697, -5.638e-5  
0.696, -5.631e-5  
0.695, -5.617e-5  
0.694, -5.609e-5  
0.693, -5.596e-5  
0.692, -5.584e-5  
0.691, -5.579e-5  
0.690, -5.568e-5  
0.689, -5.555e-5  
0.688, -5.542e-5  
0.687, -5.532e-5  
0.686, -5.524e-5  
0.685, -5.512e-5  
0.684, -5.500e-5

0.683, -5.487e-5  
0.682, -5.477e-5  
0.681, -5.469e-5  
0.680, -5.457e-5  
0.679, -5.445e-5  
0.678, -5.432e-5  
0.677, -5.422e-5  
0.676, -5.415e-5  
0.675, -5.403e-5  
0.674, -5.390e-5  
0.673, -5.374e-5  
0.672, -5.363e-5  
0.671, -5.357e-5  
0.670, -5.346e-5  
0.669, -5.334e-5  
0.668, -5.318e-5  
0.667, -5.309e-5  
0.666, -5.299e-5  
0.665, -5.286e-5  
0.664, -5.273e-5  
0.663, -5.260e-5  
0.662, -5.248e-5  
0.661, -5.240e-5  
0.660, -5.229e-5  
0.659, -5.218e-5  
0.658, -5.203e-5  
0.657, -5.193e-5  
0.656, -5.185e-5  
0.655, -5.172e-5  
0.654, -5.159e-5  
0.653, -5.144e-5  
0.652, -5.133e-5  
0.651, -5.123e-5  
0.650, -5.110e-5  
0.649, -5.097e-5  
0.648, -5.084e-5  
0.647, -5.073e-5  
0.646, -5.065e-5  
0.645, -5.052e-5  
0.644, -5.038e-5  
0.643, -5.025e-5  
0.642, -5.014e-5  
0.641, -5.005e-5  
0.640, -4.991e-5  
0.639, -4.979e-5  
0.638, -4.963e-5  
0.637, -4.953e-5  
0.636, -4.945e-5  
0.635, -4.934e-5  
0.634, -4.922e-5



0.633, -4.908e-5  
0.632, -4.899e-5  
0.631, -4.888e-5  
0.630, -4.877e-5  
0.629, -4.867e-5  
0.628, -4.852e-5  
0.627, -4.839e-5  
0.626, -4.832e-5  
0.625, -4.820e-5  
0.624, -4.811e-5  
0.623, -4.798e-5  
0.622, -4.787e-5  
0.621, -4.779e-5  
0.620, -4.766e-5  
0.619, -4.754e-5  
0.618, -4.741e-5  
0.617, -4.731e-5  
0.616, -4.722e-5  
0.615, -4.708e-5  
0.614, -4.698e-5  
0.613, -4.688e-5  
0.612, -4.678e-5  
0.611, -4.669e-5  
0.610, -4.658e-5  
0.609, -4.648e-5  
0.608, -4.636e-5  
0.607, -4.624e-5  
0.606, -4.616e-5  
0.605, -4.605e-5  
0.604, -4.596e-5  
0.603, -4.584e-5  
0.602, -4.575e-5  
0.601, -4.566e-5  
0.600, -4.554e-5  
0.599, -4.544e-5  
0.598, -4.532e-5  
0.597, -4.523e-5  
0.596, -4.515e-5  
0.595, -4.504e-5  
0.594, -4.493e-5  
0.593, -4.482e-5  
0.592, -4.473e-5  
0.591, -4.464e-5  
0.590, -4.452e-5  
0.589, -4.441e-5  
0.588, -4.428e-5  
0.587, -4.421e-5  
0.586, -4.414e-5  
0.585, -4.402e-5  
0.584, -4.391e-5

0.583, -4.377e-5  
0.582, -4.367e-5  
0.581, -4.360e-5  
0.580, -4.349e-5  
0.579, -4.337e-5  
0.578, -4.326e-5  
0.577, -4.319e-5  
0.576, -4.309e-5  
0.575, -4.295e-5  
0.574, -4.283e-5  
0.573, -4.271e-5  
0.572, -4.263e-5  
0.571, -4.252e-5  
0.570, -4.238e-5  
0.569, -4.226e-5  
0.568, -4.215e-5  
0.567, -4.206e-5  
0.566, -4.198e-5  
0.565, -4.184e-5  
0.564, -4.171e-5  
0.563, -4.155e-5  
0.562, -4.144e-5  
0.561, -4.136e-5  
0.560, -4.123e-5  
0.559, -4.110e-5  
0.558, -4.095e-5  
0.557, -4.085e-5  
0.556, -4.074e-5  
0.555, -4.060e-5  
0.554, -4.045e-5  
0.553, -4.030e-5  
0.552, -4.017e-5  
0.551, -4.003e-5  
0.550, -3.990e-5  
0.549, -3.977e-5  
0.548, -3.960e-5  
0.547, -3.950e-5  
0.546, -3.938e-5  
0.545, -3.922e-5  
0.544, -3.906e-5  
0.543, -3.888e-5  
0.542, -3.876e-5  
0.541, -3.864e-5  
0.540, -3.845e-5  
0.539, -3.830e-5  
0.538, -3.814e-5  
0.537, -3.802e-5  
0.536, -3.790e-5  
0.535, -3.773e-5  
0.534, -3.755e-5

0.533, -3.736e-5  
0.532, -3.721e-5  
0.531, -3.707e-5  
0.530, -3.690e-5  
0.529, -3.672e-5  
0.528, -3.652e-5  
0.527, -3.635e-5  
0.526, -3.620e-5  
0.525, -3.600e-5  
0.524, -3.579e-5  
0.523, -3.557e-5  
0.522, -3.536e-5  
0.521, -3.520e-5  
0.520, -3.498e-5  
0.519, -3.478e-5  
0.518, -3.456e-5  
0.517, -3.437e-5  
0.516, -3.420e-5  
0.515, -3.398e-5  
0.514, -3.373e-5  
0.513, -3.348e-5  
0.512, -3.329e-5  
0.511, -3.311e-5  
0.510, -3.288e-5  
0.509, -3.264e-5  
0.508, -3.238e-5  
0.507, -3.217e-5  
0.506, -3.196e-5  
0.505, -3.172e-5  
0.504, -3.146e-5  
0.503, -3.119e-5  
0.502, -3.096e-5  
0.501, -3.074e-5  
0.500, -3.045e-5  
0.499, -3.020e-5  
0.498, -2.991e-5  
0.497, -2.968e-5  
0.496, -2.946e-5  
0.495, -2.918e-5  
0.494, -2.892e-5  
0.493, -2.865e-5  
0.492, -2.838e-5  
0.491, -2.814e-5  
0.490, -2.787e-5  
0.489, -2.759e-5  
0.488, -2.730e-5  
0.487, -2.704e-5  
0.486, -2.680e-5  
0.485, -2.650e-5  
0.484, -2.622e-5

0.483, -2.593e-5  
0.482, -2.565e-5  
0.481, -2.540e-5  
0.480, -2.510e-5  
0.479, -2.477e-5  
0.478, -2.446e-5  
0.477, -2.418e-5  
0.476, -2.394e-5  
0.475, -2.365e-5  
0.474, -2.335e-5  
0.473, -2.303e-5  
0.472, -2.274e-5  
0.471, -2.248e-5  
0.470, -2.219e-5  
0.469, -2.186e-5  
0.468, -2.156e-5  
0.467, -2.128e-5  
0.466, -2.103e-5  
0.465, -2.072e-5  
0.464, -2.042e-5  
0.463, -2.011e-5  
0.462, -1.986e-5  
0.461, -1.962e-5  
0.460, -1.928e-5  
0.459, -1.900e-5  
0.458, -1.870e-5  
0.457, -1.846e-5  
0.456, -1.822e-5  
0.455, -1.793e-5  
0.454, -1.767e-5  
0.453, -1.738e-5  
0.452, -1.712e-5  
0.451, -1.690e-5  
0.450, -1.663e-5  
0.449, -1.636e-5  
0.448, -1.607e-5  
0.447, -1.586e-5  
0.446, -1.566e-5  
0.445, -1.539e-5  
0.444, -1.516e-5  
0.443, -1.490e-5  
0.442, -1.468e-5  
0.441, -1.447e-5  
0.440, -1.421e-5  
0.439, -1.394e-5  
0.438, -1.368e-5  
0.437, -1.349e-5  
0.436, -1.330e-5  
0.435, -1.304e-5  
0.434, -1.282e-5

0.433, -1.259e-5  
0.432, -1.240e-5  
0.431, -1.220e-5  
0.430, -1.198e-5  
0.429, -1.177e-5  
0.428, -1.154e-5  
0.427, -1.137e-5  
0.426, -1.119e-5  
0.425, -1.096e-5  
0.424, -1.076e-5  
0.423, -1.055e-5  
0.422, -1.039e-5  
0.421, -1.023e-5  
0.420, -1.002e-5  
0.419, -9.837e-6  
0.418, -9.625e-6  
0.417, -9.473e-6  
0.416, -9.323e-6  
0.415, -9.130e-6  
0.414, -8.939e-6  
0.413, -8.750e-6  
0.412, -8.585e-6  
0.411, -8.442e-6  
0.410, -8.255e-6  
0.409, -8.070e-6  
0.408, -7.890e-6  
0.407, -7.746e-6  
0.406, -7.611e-6  
0.405, -7.419e-6  
0.404, -7.273e-6  
0.403, -7.097e-6  
0.402, -6.969e-6  
0.401, -6.824e-6  
0.400, -6.663e-6  
0.399, -6.501e-6  
0.398, -6.351e-6  
0.397, -6.231e-6  
0.396, -6.108e-6  
0.395, -5.951e-6  
0.394, -5.812e-6  
0.393, -5.661e-6  
0.392, -5.539e-6  
0.391, -5.418e-6  
0.390, -5.270e-6  
0.389, -5.136e-6  
0.388, -4.983e-6  
0.387, -4.864e-6  
0.386, -4.757e-6  
0.385, -4.610e-6  
0.384, -4.474e-6

0.383, -4.339e-6  
0.382, -4.237e-6  
0.381, -4.134e-6  
0.380, -3.991e-6  
0.379, -3.880e-6  
0.378, -3.741e-6  
0.377, -3.630e-6  
0.376, -3.549e-6  
0.375, -3.414e-6  
0.374, -3.284e-6  
0.373, -3.153e-6  
0.372, -3.080e-6  
0.371, -2.984e-6  
0.370, -2.870e-6  
0.369, -2.765e-6  
0.368, -2.643e-6  
0.367, -2.548e-6  
0.366, -2.449e-6  
0.365, -2.321e-6  
0.364, -2.218e-6  
0.363, -2.121e-6  
0.362, -2.046e-6  
0.361, -1.972e-6  
0.360, -1.863e-6  
0.359, -1.743e-6  
0.358, -1.625e-6  
0.357, -1.558e-6  
0.356, -1.480e-6  
0.355, -1.384e-6  
0.354, -1.298e-6  
0.353, -1.195e-6  
0.352, -1.134e-6  
0.351, -1.072e-6  
0.350, -9.732e-7  
0.349, -8.582e-7  
0.348, -7.600e-7  
0.347, -7.079e-7  
0.346, -6.382e-7  
0.345, -5.547e-7  
0.344, -4.712e-7  
0.343, -3.464e-7  
0.342, -3.120e-7  
0.341, -2.511e-7  
0.340, -1.705e-7  
0.339, -8.704e-8  
0.338, -8.449e-9  
0.337, 4.362e-8  
0.336, 1.094e-7  
0.335, 2.067e-7  
0.334, 2.755e-7

0.333, 3.590e-7  
0.332, 4.140e-7  
0.331, 4.808e-7  
0.330, 5.604e-7  
0.329, 6.439e-7  
0.328, 7.342e-7  
0.327, 7.794e-7  
0.326, 8.266e-7  
0.325, 9.140e-7  
0.324, 9.867e-7  
0.323, 1.077e-6  
0.322, 1.127e-6  
0.321, 1.177e-6  
0.320, 1.260e-6  
0.319, 1.319e-6  
0.318, 1.401e-6  
0.317, 1.437e-6  
0.316, 1.489e-6  
0.315, 1.552e-6  
0.314, 1.619e-6  
0.313, 1.700e-6  
0.312, 1.738e-6  
0.311, 1.821e-6  
0.310, 1.897e-6  
0.309, 1.934e-6  
0.308, 2.021e-6  
0.307, 2.068e-6  
0.306, 2.119e-6  
0.305, 2.206e-6  
0.304, 2.250e-6  
0.303, 2.311e-6  
0.302, 2.359e-6  
0.301, 2.430e-6  
0.300, 2.495e-6  
0.299, 2.533e-6  
0.298, 2.612e-6  
0.297, 2.652e-6  
0.296, 2.727e-6  
0.295, 2.777e-6  
0.294, 2.842e-6  
0.293, 2.902e-6  
0.292, 2.943e-6  
0.291, 2.987e-6  
0.290, 3.060e-6  
0.289, 3.121e-6  
0.288, 3.218e-6  
0.287, 3.262e-6  
0.286, 3.292e-6  
0.285, 3.361e-6  
0.284, 3.417e-6

0.283, 3.477e-6  
0.282, 3.509e-6  
0.281, 3.594e-6  
0.280, 3.644e-6  
0.279, 3.692e-6  
0.278, 3.764e-6  
0.277, 3.792e-6  
0.276, 3.851e-6  
0.275, 3.926e-6  
0.274, 3.973e-6  
0.273, 4.049e-6  
0.272, 4.092e-6  
0.271, 4.134e-6  
0.270, 4.203e-6  
0.269, 4.265e-6  
0.268, 4.366e-6  
0.267, 4.411e-6  
0.266, 4.434e-6  
0.265, 4.498e-6  
0.264, 4.560e-6  
0.263, 4.630e-6  
0.262, 4.676e-6  
0.261, 4.712e-6  
0.260, 4.791e-6  
0.259, 4.845e-6  
0.258, 4.918e-6  
0.257, 4.967e-6  
0.256, 5.029e-6  
0.255, 5.081e-6  
0.254, 5.139e-6  
0.253, 5.215e-6  
0.252, 5.257e-6  
0.251, 5.317e-6  
0.250, 5.417e-6  
0.249, 5.474e-6  
0.248, 5.528e-6  
0.247, 5.571e-6  
0.246, 5.604e-6  
0.245, 5.675e-6  
0.244, 5.737e-6  
0.243, 5.812e-6  
0.242, 5.862e-6  
0.241, 5.909e-6  
0.240, 5.980e-6  
0.239, 6.036e-6  
0.238, 6.115e-6  
0.237, 6.153e-6  
0.236, 6.211e-6  
0.235, 6.271e-6  
0.234, 6.337e-6



0.233, 6.425e-6  
0.232, 6.461e-6  
0.231, 6.509e-6  
0.230, 6.580e-6  
0.229, 6.635e-6  
0.228, 6.739e-6  
0.227, 6.772e-6  
0.226, 6.836e-6  
0.225, 6.893e-6  
0.224, 6.956e-6  
0.223, 7.041e-6  
0.222, 7.116e-6  
0.221, 7.157e-6  
0.220, 7.228e-6  
0.219, 7.283e-6  
0.218, 7.351e-6  
0.217, 7.402e-6  
0.216, 7.450e-6  
0.215, 7.526e-6  
0.214, 7.596e-6  
0.213, 7.678e-6  
0.212, 7.717e-6  
0.211, 7.770e-6  
0.210, 7.845e-6  
0.209, 7.906e-6  
0.208, 8.019e-6  
0.207, 8.074e-6  
0.206, 8.122e-6  
0.205, 8.191e-6  
0.204, 8.261e-6  
0.203, 8.353e-6  
0.202, 8.404e-6  
0.201, 8.472e-6  
0.200, 8.553e-6  
0.199, 8.611e-6  
0.198, 8.684e-6  
0.197, 8.738e-6  
0.196, 8.803e-6  
0.195, 8.873e-6  
0.194, 8.944e-6  
0.193, 9.034e-6  
0.192, 9.077e-6  
0.191, 9.148e-6  
0.190, 9.221e-6  
0.189, 9.328e-6  
0.188, 9.430e-6  
0.187, 9.476e-6  
0.186, 9.523e-6  
0.185, 9.607e-6  
0.184, 9.687e-6

0.183, 9.766e-6  
0.182, 9.809e-6  
0.181, 9.876e-6  
0.180, 9.969e-6  
0.179, 1.003e-5  
0.178, 1.012e-5  
0.177, 1.018e-5  
0.176, 1.024e-5  
0.175, 1.034e-5  
0.174, 1.043e-5  
0.173, 1.053e-5  
0.172, 1.060e-5  
0.171, 1.066e-5  
0.170, 1.076e-5  
0.169, 1.084e-5  
0.168, 1.096e-5  
0.167, 1.103e-5  
0.166, 1.110e-5  
0.165, 1.120e-5  
0.164, 1.130e-5  
0.163, 1.140e-5  
0.162, 1.146e-5  
0.161, 1.154e-5  
0.160, 1.165e-5  
0.159, 1.175e-5  
0.158, 1.185e-5  
0.157, 1.193e-5  
0.156, 1.202e-5  
0.155, 1.213e-5  
0.154, 1.225e-5  
0.153, 1.235e-5  
0.152, 1.243e-5  
0.151, 1.253e-5  
0.150, 1.265e-5  
0.149, 1.276e-5  
0.148, 1.289e-5  
0.147, 1.298e-5  
0.146, 1.309e-5  
0.145, 1.321e-5  
0.144, 1.332e-5  
0.143, 1.345e-5  
0.142, 1.353e-5  
0.141, 1.365e-5  
0.140, 1.379e-5  
0.139, 1.392e-5  
0.138, 1.408e-5  
0.137, 1.419e-5  
0.136, 1.430e-5  
0.135, 1.443e-5  
0.134, 1.457e-5

0.133, 1.471e-5  
0.132, 1.483e-5  
0.131, 1.495e-5  
0.130, 1.512e-5  
0.129, 1.527e-5  
0.128, 1.545e-5  
0.127, 1.558e-5  
0.126, 1.573e-5  
0.125, 1.589e-5  
0.124, 1.603e-5  
0.123, 1.621e-5  
0.122, 1.635e-5  
0.121, 1.650e-5  
0.120, 1.668e-5  
0.119, 1.686e-5  
0.118, 1.705e-5  
0.117, 1.720e-5  
0.116, 1.736e-5  
0.115, 1.756e-5  
0.114, 1.776e-5  
0.113, 1.796e-5  
0.112, 1.812e-5  
0.111, 1.831e-5  
0.110, 1.850e-5  
0.109, 1.870e-5  
0.108, 1.893e-5  
0.107, 1.910e-5  
0.106, 1.928e-5  
0.105, 1.950e-5  
0.104, 1.970e-5  
0.103, 1.995e-5  
0.102, 2.015e-5  
0.101, 2.033e-5  
0.100, 2.056e-5  
0.099, 2.078e-5  
0.098, 2.102e-5  
0.097, 2.122e-5  
0.096, 2.144e-5  
0.095, 2.168e-5  
0.094, 2.187e-5  
0.093, 2.210e-5  
0.092, 2.229e-5  
0.091, 2.248e-5  
0.090, 2.273e-5  
0.089, 2.298e-5  
0.088, 2.323e-5  
0.087, 2.346e-5  
0.086, 2.367e-5  
0.085, 2.392e-5  
0.084, 2.416e-5

0.083, 2.442e-5  
0.082, 2.463e-5  
0.081, 2.486e-5  
0.080, 2.513e-5  
0.079, 2.537e-5  
0.078, 2.565e-5  
0.077, 2.587e-5  
0.076, 2.611e-5  
0.075, 2.636e-5  
0.074, 2.661e-5  
0.073, 2.688e-5  
0.072, 2.710e-5  
0.071, 2.734e-5  
0.070, 2.760e-5  
0.069, 2.784e-5  
0.068, 2.808e-5  
0.067, 2.829e-5  
0.066, 2.853e-5  
0.065, 2.881e-5  
0.064, 2.906e-5  
0.063, 2.930e-5  
0.062, 2.951e-5  
0.061, 2.977e-5  
0.060, 3.002e-5  
0.059, 3.022e-5  
0.058, 3.049e-5  
0.057, 3.072e-5  
0.056, 3.094e-5  
0.055, 3.118e-5  
0.054, 3.142e-5  
0.053, 3.169e-5  
0.052, 3.190e-5  
0.051, 3.212e-5  
0.050, 3.238e-5  
0.049, 3.263e-5  
0.048, 3.290e-5  
0.047, 3.309e-5  
0.046, 3.330e-5  
0.045, 3.354e-5  
0.044, 3.377e-5  
0.043, 3.401e-5  
0.042, 3.422e-5  
0.041, 3.444e-5  
0.040, 3.469e-5  
0.039, 3.492e-5  
0.038, 3.516e-5  
0.037, 3.534e-5  
0.036, 3.558e-5  
0.035, 3.581e-5  
0.034, 3.603e-5

0.033, 3.625e-5  
0.032, 3.645e-5  
0.031, 3.667e-5  
0.030, 3.692e-5  
0.029, 3.716e-5  
0.028, 3.738e-5  
0.027, 3.758e-5  
0.026, 3.778e-5  
0.025, 3.799e-5  
0.024, 3.821e-5  
0.023, 3.844e-5  
0.022, 3.865e-5  
0.021, 3.885e-5  
0.020, 3.908e-5  
0.019, 3.931e-5  
0.018, 3.954e-5  
0.017, 3.973e-5  
0.016, 3.994e-5  
0.015, 4.018e-5  
0.014, 4.041e-5  
0.013, 4.063e-5  
0.012, 4.084e-5  
0.011, 4.104e-5  
0.010, 4.126e-5  
0.009, 4.146e-5  
0.008, 4.168e-5  
0.007, 4.186e-5  
0.006, 4.209e-5  
0.005, 4.232e-5  
0.004, 4.253e-5  
0.003, 4.278e-5  
0.002, 4.297e-5  
0.001, 4.316e-5  
0.000, 4.341e-5  
-0.001, 4.362e-5  
-0.002, 4.385e-5  
-0.003, 4.404e-5  
-0.004, 4.426e-5  
-0.005, 4.450e-5  
-0.006, 4.474e-5  
-0.007, 4.498e-5  
-0.008, 4.517e-5  
-0.009, 4.539e-5  
-0.010, 4.562e-5  
-0.011, 4.584e-5  
-0.012, 4.610e-5  
-0.013, 4.631e-5  
-0.014, 4.653e-5  
-0.015, 4.675e-5  
-0.016, 4.697e-5

-0.017, 4.721e-5  
-0.018, 4.742e-5  
-0.019, 4.764e-5  
-0.020, 4.788e-5  
-0.021, 4.813e-5  
-0.022, 4.836e-5  
-0.023, 4.856e-5  
-0.024, 4.879e-5  
-0.025, 4.905e-5  
-0.026, 4.929e-5  
-0.027, 4.955e-5  
-0.028, 4.974e-5  
-0.029, 4.997e-5  
-0.030, 5.021e-5  
-0.031, 5.046e-5  
-0.032, 5.071e-5  
-0.033, 5.094e-5  
-0.034, 5.119e-5  
-0.035, 5.145e-5  
-0.036, 5.168e-5  
-0.037, 5.196e-5  
-0.038, 5.217e-5  
-0.039, 5.243e-5  
-0.040, 5.269e-5  
-0.041, 5.294e-5  
-0.042, 5.320e-5  
-0.043, 5.342e-5  
-0.044, 5.367e-5  
-0.045, 5.393e-5  
-0.046, 5.418e-5  
-0.047, 5.446e-5  
-0.048, 5.470e-5  
-0.049, 5.496e-5  
-0.050, 5.522e-5  
-0.051, 5.549e-5  
-0.052, 5.577e-5  
-0.053, 5.602e-5  
-0.054, 5.631e-5  
-0.055, 5.656e-5  
-0.056, 5.681e-5  
-0.057, 5.707e-5  
-0.058, 5.731e-5  
-0.059, 5.756e-5  
-0.060, 5.785e-5  
-0.061, 5.811e-5  
-0.062, 5.838e-5  
-0.063, 5.863e-5  
-0.064, 5.890e-5  
-0.065, 5.922e-5  
-0.066, 5.948e-5

-0.067, 5.977e-5  
-0.068, 6.004e-5  
-0.069, 6.032e-5  
-0.070, 6.062e-5  
-0.071, 6.092e-5  
-0.072, 6.119e-5  
-0.073, 6.144e-5  
-0.074, 6.172e-5  
-0.075, 6.203e-5  
-0.076, 6.231e-5  
-0.077, 6.258e-5  
-0.078, 6.284e-5  
-0.079, 6.314e-5  
-0.080, 6.344e-5  
-0.081, 6.375e-5  
-0.082, 6.408e-5  
-0.083, 6.436e-5  
-0.084, 6.465e-5  
-0.085, 6.495e-5  
-0.086, 6.525e-5  
-0.087, 6.556e-5  
-0.088, 6.582e-5  
-0.089, 6.611e-5  
-0.090, 6.644e-5  
-0.091, 6.673e-5  
-0.092, 6.705e-5  
-0.093, 6.734e-5  
-0.094, 6.768e-5  
-0.095, 6.799e-5  
-0.096, 6.829e-5  
-0.097, 6.861e-5  
-0.098, 6.890e-5  
-0.099, 6.920e-5  
-0.100, 6.953e-5  
-0.101, 6.983e-5  
-0.102, 7.019e-5  
-0.103, 7.048e-5  
-0.104, 7.077e-5  
-0.105, 7.107e-5  
-0.106, 7.137e-5  
-0.107, 7.170e-5  
-0.108, 7.202e-5  
-0.109, 7.235e-5  
-0.110, 7.269e-5  
-0.111, 7.300e-5  
-0.112, 7.336e-5  
-0.113, 7.367e-5  
-0.114, 7.402e-5  
-0.115, 7.436e-5  
-0.116, 7.470e-5

-0.117, 7.504e-5  
-0.118, 7.536e-5  
-0.119, 7.570e-5  
-0.120, 7.605e-5  
-0.121, 7.637e-5  
-0.122, 7.673e-5  
-0.123, 7.705e-5  
-0.124, 7.742e-5  
-0.125, 7.777e-5  
-0.126, 7.810e-5  
-0.127, 7.844e-5  
-0.128, 7.878e-5  
-0.129, 7.914e-5  
-0.130, 7.949e-5  
-0.131, 7.984e-5  
-0.132, 8.019e-5  
-0.133, 8.050e-5  
-0.134, 8.088e-5  
-0.135, 8.124e-5  
-0.136, 8.157e-5  
-0.137, 8.192e-5  
-0.138, 8.225e-5  
-0.139, 8.261e-5  
-0.140, 8.301e-5  
-0.141, 8.335e-5  
-0.142, 8.371e-5  
-0.143, 8.407e-5  
-0.144, 8.443e-5  
-0.145, 8.480e-5  
-0.146, 8.516e-5  
-0.147, 8.552e-5  
-0.148, 8.588e-5  
-0.149, 8.622e-5  
-0.150, 8.660e-5  
-0.151, 8.695e-5  
-0.152, 8.731e-5  
-0.153, 8.766e-5  
-0.154, 8.803e-5  
-0.155, 8.840e-5  
-0.156, 8.875e-5  
-0.157, 8.915e-5  
-0.158, 8.951e-5  
-0.159, 8.988e-5  
-0.160, 9.025e-5  
-0.161, 9.059e-5  
-0.162, 9.097e-5  
-0.163, 9.132e-5  
-0.164, 9.171e-5  
-0.165, 9.206e-5  
-0.166, 9.241e-5



-0.167, 9.281e-5  
-0.168, 9.315e-5  
-0.169, 9.355e-5  
-0.170, 9.394e-5  
-0.171, 9.428e-5  
-0.172, 9.467e-5  
-0.173, 9.503e-5  
-0.174, 9.542e-5  
-0.175, 9.579e-5  
-0.176, 9.615e-5  
-0.177, 9.654e-5  
-0.178, 9.688e-5  
-0.179, 9.725e-5  
-0.180, 9.763e-5  
-0.181, 9.795e-5  
-0.182, 9.834e-5  
-0.183, 9.870e-5  
-0.184, 9.909e-5  
-0.185, 9.949e-5  
-0.186, 9.984e-5  
-0.187, 1.002e-4  
-0.188, 1.005e-4  
-0.189, 1.009e-4  
-0.190, 1.013e-4  
-0.191, 1.017e-4  
-0.192, 1.021e-4  
-0.193, 1.024e-4  
-0.194, 1.028e-4  
-0.195, 1.031e-4  
-0.196, 1.035e-4  
-0.197, 1.039e-4  
-0.198, 1.043e-4  
-0.199, 1.047e-4  
-0.200, 1.051e-4  
-0.201, 1.054e-4  
-0.202, 1.058e-4  
-0.203, 1.062e-4  
-0.204, 1.066e-4  
-0.205, 1.069e-4  
-0.206, 1.073e-4  
-0.207, 1.076e-4  
-0.208, 1.080e-4  
-0.209, 1.083e-4  
-0.210, 1.087e-4  
-0.211, 1.091e-4  
-0.212, 1.095e-4  
-0.213, 1.098e-4  
-0.214, 1.103e-4  
-0.215, 1.108e-4  
-0.216, 1.114e-4

-0.217, 1.118e-4  
-0.218, 1.120e-4  
-0.219, 1.123e-4  
-0.220, 1.126e-4  
-0.221, 1.129e-4  
-0.222, 1.133e-4  
-0.223, 1.136e-4  
-0.224, 1.140e-4  
-0.225, 1.143e-4  
-0.226, 1.147e-4  
-0.227, 1.151e-4  
-0.228, 1.154e-4  
-0.229, 1.158e-4  
-0.230, 1.162e-4  
-0.231, 1.165e-4  
-0.232, 1.168e-4  
-0.233, 1.172e-4  
-0.234, 1.175e-4  
-0.235, 1.179e-4  
-0.236, 1.182e-4  
-0.237, 1.186e-4  
-0.238, 1.190e-4  
-0.239, 1.193e-4  
-0.240, 1.196e-4  
-0.241, 1.200e-4  
-0.242, 1.204e-4  
-0.243, 1.208e-4  
-0.244, 1.211e-4  
-0.245, 1.215e-4  
-0.246, 1.218e-4  
-0.247, 1.222e-4  
-0.248, 1.226e-4  
-0.249, 1.230e-4  
-0.250, 1.234e-4  
-0.251, 1.237e-4  
-0.252, 1.241e-4  
-0.253, 1.245e-4  
-0.254, 1.249e-4  
-0.255, 1.252e-4  
-0.256, 1.256e-4  
-0.257, 1.260e-4  
-0.258, 1.264e-4  
-0.259, 1.267e-4  
-0.260, 1.271e-4  
-0.261, 1.274e-4  
-0.262, 1.278e-4  
-0.263, 1.281e-4  
-0.264, 1.285e-4  
-0.265, 1.288e-4  
-0.266, 1.291e-4

-0.267, 1.295e-4  
-0.268, 1.299e-4  
-0.269, 1.303e-4  
-0.270, 1.307e-4  
-0.271, 1.310e-4  
-0.272, 1.314e-4  
-0.273, 1.318e-4  
-0.274, 1.322e-4  
-0.275, 1.326e-4  
-0.276, 1.329e-4  
-0.277, 1.333e-4  
-0.278, 1.336e-4  
-0.279, 1.340e-4  
-0.280, 1.344e-4  
-0.281, 1.347e-4  
-0.282, 1.351e-4  
-0.283, 1.354e-4  
-0.284, 1.359e-4  
-0.285, 1.362e-4  
-0.286, 1.365e-4  
-0.287, 1.370e-4  
-0.288, 1.374e-4  
-0.289, 1.377e-4  
-0.290, 1.381e-4  
-0.291, 1.384e-4  
-0.292, 1.388e-4  
-0.293, 1.391e-4  
-0.294, 1.396e-4  
-0.295, 1.399e-4  
-0.296, 1.403e-4  
-0.297, 1.406e-4  
-0.298, 1.410e-4  
-0.299, 1.413e-4  
-0.300, 1.417e-4  
-0.301, 1.420e-4  
-0.302, 1.423e-4  
-0.303, 1.427e-4  
-0.304, 1.431e-4  
-0.305, 1.434e-4  
-0.306, 1.438e-4  
-0.307, 1.442e-4  
-0.308, 1.446e-4  
-0.309, 1.450e-4  
-0.310, 1.453e-4  
-0.311, 1.457e-4  
-0.312, 1.461e-4  
-0.313, 1.465e-4  
-0.314, 1.469e-4  
-0.315, 1.472e-4  
-0.316, 1.475e-4

-0.317, 1.479e-4  
-0.318, 1.482e-4  
-0.319, 1.485e-4  
-0.320, 1.488e-4  
-0.321, 1.491e-4  
-0.322, 1.495e-4  
-0.323, 1.498e-4  
-0.324, 1.502e-4  
-0.325, 1.505e-4  
-0.326, 1.508e-4  
-0.327, 1.512e-4  
-0.328, 1.515e-4  
-0.329, 1.519e-4  
-0.330, 1.522e-4  
-0.331, 1.525e-4  
-0.332, 1.528e-4  
-0.333, 1.531e-4  
-0.334, 1.535e-4  
-0.335, 1.538e-4  
-0.336, 1.540e-4  
-0.337, 1.544e-4  
-0.338, 1.547e-4  
-0.339, 1.550e-4  
-0.340, 1.553e-4  
-0.341, 1.555e-4  
-0.342, 1.559e-4  
-0.343, 1.562e-4  
-0.344, 1.565e-4  
-0.345, 1.567e-4  
-0.346, 1.570e-4  
-0.347, 1.573e-4  
-0.348, 1.577e-4  
-0.349, 1.580e-4  
-0.350, 1.583e-4  
-0.351, 1.585e-4  
-0.352, 1.588e-4  
-0.353, 1.591e-4  
-0.354, 1.594e-4  
-0.355, 1.596e-4  
-0.356, 1.598e-4  
-0.357, 1.601e-4  
-0.358, 1.604e-4  
-0.359, 1.607e-4  
-0.360, 1.610e-4  
-0.361, 1.612e-4  
-0.362, 1.615e-4  
-0.363, 1.618e-4  
-0.364, 1.622e-4  
-0.365, 1.625e-4  
-0.366, 1.627e-4

-0.367, 1.629e-4  
-0.368, 1.632e-4  
-0.369, 1.634e-4  
-0.370, 1.636e-4  
-0.371, 1.638e-4  
-0.372, 1.641e-4  
-0.373, 1.644e-4  
-0.374, 1.647e-4  
-0.375, 1.649e-4  
-0.376, 1.651e-4  
-0.377, 1.654e-4  
-0.378, 1.657e-4  
-0.379, 1.661e-4  
-0.380, 1.663e-4  
-0.381, 1.665e-4  
-0.382, 1.667e-4  
-0.383, 1.669e-4  
-0.384, 1.671e-4  
-0.385, 1.673e-4  
-0.386, 1.675e-4  
-0.387, 1.678e-4  
-0.388, 1.681e-4  
-0.389, 1.684e-4  
-0.390, 1.686e-4  
-0.391, 1.689e-4  
-0.392, 1.692e-4  
-0.393, 1.694e-4  
-0.394, 1.697e-4  
-0.395, 1.699e-4  
-0.396, 1.700e-4  
-0.397, 1.702e-4  
-0.398, 1.704e-4  
-0.399, 1.706e-4

Mar. 30, 2021 03:32:51

Linear Sweep Voltammetry

File: c:\users\shadji04\desktop\sofia cv\30032021\complex 6 sweep experiment inder  
o2\500 rpm\_25 mv rate.txt

Data Source: Experiment

Instrument Model: CHI650E

Header:

Note: 500 rpm

Init E (V) = 0.8

Final E (V) = -0.4

Scan Rate (V/s) = 0.025

Sample Interval (V) = 0.001

Quiet Time (sec) = 2

Sensitivity (A/V) = 0.001

Potential/V, Current/A

0.800, -9.064e-5

0.799, -9.025e-5

0.798, -8.997e-5  
0.797, -8.969e-5  
0.796, -8.947e-5  
0.795, -8.927e-5  
0.794, -8.906e-5  
0.793, -8.890e-5  
0.792, -8.869e-5  
0.791, -8.850e-5  
0.790, -8.832e-5  
0.789, -8.813e-5  
0.788, -8.795e-5  
0.787, -8.780e-5  
0.786, -8.759e-5  
0.785, -8.737e-5  
0.784, -8.724e-5  
0.783, -8.706e-5  
0.782, -8.683e-5  
0.781, -8.666e-5  
0.780, -8.648e-5  
0.779, -8.629e-5  
0.778, -8.615e-5  
0.777, -8.598e-5  
0.776, -8.582e-5  
0.775, -8.570e-5  
0.774, -8.555e-5  
0.773, -8.541e-5  
0.772, -8.530e-5  
0.771, -8.514e-5  
0.770, -8.503e-5  
0.769, -8.493e-5  
0.768, -8.479e-5  
0.767, -8.466e-5  
0.766, -8.455e-5  
0.765, -8.438e-5  
0.764, -8.422e-5  
0.763, -8.412e-5  
0.762, -8.396e-5  
0.761, -8.380e-5  
0.760, -8.370e-5  
0.759, -8.356e-5  
0.758, -8.340e-5  
0.757, -8.327e-5  
0.756, -8.308e-5  
0.755, -8.292e-5  
0.754, -8.277e-5  
0.753, -8.263e-5  
0.752, -8.247e-5  
0.751, -8.234e-5  
0.750, -8.216e-5  
0.749, -8.199e-5

0.748, -8.186e-5  
0.747, -8.170e-5  
0.746, -8.154e-5  
0.745, -8.139e-5  
0.744, -8.119e-5  
0.743, -8.101e-5  
0.742, -8.090e-5  
0.741, -8.073e-5  
0.740, -8.058e-5  
0.739, -8.047e-5  
0.738, -8.032e-5  
0.737, -8.023e-5  
0.736, -8.021e-5  
0.735, -8.009e-5  
0.734, -7.999e-5  
0.733, -7.989e-5  
0.732, -7.974e-5  
0.731, -7.962e-5  
0.730, -7.953e-5  
0.729, -7.940e-5  
0.728, -7.917e-5  
0.727, -7.899e-5  
0.726, -7.885e-5  
0.725, -7.869e-5  
0.724, -7.857e-5  
0.723, -7.842e-5  
0.722, -7.826e-5  
0.721, -7.813e-5  
0.720, -7.797e-5  
0.719, -7.778e-5  
0.718, -7.767e-5  
0.717, -7.752e-5  
0.716, -7.735e-5  
0.715, -7.723e-5  
0.714, -7.708e-5  
0.713, -7.692e-5  
0.712, -7.681e-5  
0.711, -7.666e-5  
0.710, -7.648e-5  
0.709, -7.636e-5  
0.708, -7.620e-5  
0.707, -7.604e-5  
0.706, -7.592e-5  
0.705, -7.577e-5  
0.704, -7.559e-5  
0.703, -7.549e-5  
0.702, -7.536e-5  
0.701, -7.519e-5  
0.700, -7.508e-5  
0.699, -7.495e-5

0.698, -7.479e-5  
0.697, -7.469e-5  
0.696, -7.455e-5  
0.695, -7.437e-5  
0.694, -7.424e-5  
0.693, -7.411e-5  
0.692, -7.395e-5  
0.691, -7.385e-5  
0.690, -7.371e-5  
0.689, -7.357e-5  
0.688, -7.350e-5  
0.687, -7.339e-5  
0.686, -7.324e-5  
0.685, -7.310e-5  
0.684, -7.291e-5  
0.683, -7.269e-5  
0.682, -7.256e-5  
0.681, -7.241e-5  
0.680, -7.222e-5  
0.679, -7.207e-5  
0.678, -7.188e-5  
0.677, -7.170e-5  
0.676, -7.154e-5  
0.675, -7.138e-5  
0.674, -7.120e-5  
0.673, -7.108e-5  
0.672, -7.094e-5  
0.671, -7.077e-5  
0.670, -7.063e-5  
0.669, -7.048e-5  
0.668, -7.032e-5  
0.667, -7.021e-5  
0.666, -7.009e-5  
0.665, -6.992e-5  
0.664, -6.978e-5  
0.663, -6.961e-5  
0.662, -6.944e-5  
0.661, -6.929e-5  
0.660, -6.911e-5  
0.659, -6.896e-5  
0.658, -6.883e-5  
0.657, -6.870e-5  
0.656, -6.851e-5  
0.655, -6.837e-5  
0.654, -6.821e-5  
0.653, -6.804e-5  
0.652, -6.790e-5  
0.651, -6.777e-5  
0.650, -6.759e-5  
0.649, -6.747e-5



0.648, -6.732e-5  
0.647, -6.716e-5  
0.646, -6.702e-5  
0.645, -6.688e-5  
0.644, -6.670e-5  
0.643, -6.656e-5  
0.642, -6.639e-5  
0.641, -6.621e-5  
0.640, -6.609e-5  
0.639, -6.594e-5  
0.638, -6.576e-5  
0.637, -6.566e-5  
0.636, -6.551e-5  
0.635, -6.535e-5  
0.634, -6.522e-5  
0.633, -6.508e-5  
0.632, -6.492e-5  
0.631, -6.479e-5  
0.630, -6.463e-5  
0.629, -6.442e-5  
0.628, -6.426e-5  
0.627, -6.411e-5  
0.626, -6.392e-5  
0.625, -6.380e-5  
0.624, -6.367e-5  
0.623, -6.348e-5  
0.622, -6.338e-5  
0.621, -6.324e-5  
0.620, -6.306e-5  
0.619, -6.295e-5  
0.618, -6.281e-5  
0.617, -6.265e-5  
0.616, -6.253e-5  
0.615, -6.238e-5  
0.614, -6.220e-5  
0.613, -6.208e-5  
0.612, -6.195e-5  
0.611, -6.179e-5  
0.610, -6.167e-5  
0.609, -6.156e-5  
0.608, -6.139e-5  
0.607, -6.129e-5  
0.606, -6.116e-5  
0.605, -6.101e-5  
0.604, -6.090e-5  
0.603, -6.080e-5  
0.602, -6.064e-5  
0.601, -6.052e-5  
0.600, -6.042e-5  
0.599, -6.026e-5

0.598, -6.017e-5  
0.597, -6.006e-5  
0.596, -5.989e-5  
0.595, -5.979e-5  
0.594, -5.967e-5  
0.593, -5.944e-5  
0.592, -5.935e-5  
0.591, -5.923e-5  
0.590, -5.907e-5  
0.589, -5.896e-5  
0.588, -5.882e-5  
0.587, -5.867e-5  
0.586, -5.855e-5  
0.585, -5.843e-5  
0.584, -5.827e-5  
0.583, -5.816e-5  
0.582, -5.804e-5  
0.581, -5.788e-5  
0.580, -5.776e-5  
0.579, -5.766e-5  
0.578, -5.749e-5  
0.577, -5.736e-5  
0.576, -5.723e-5  
0.575, -5.705e-5  
0.574, -5.692e-5  
0.573, -5.681e-5  
0.572, -5.664e-5  
0.571, -5.656e-5  
0.570, -5.644e-5  
0.569, -5.628e-5  
0.568, -5.617e-5  
0.567, -5.606e-5  
0.566, -5.586e-5  
0.565, -5.571e-5  
0.564, -5.558e-5  
0.563, -5.541e-5  
0.562, -5.528e-5  
0.561, -5.515e-5  
0.560, -5.497e-5  
0.559, -5.484e-5  
0.558, -5.468e-5  
0.557, -5.446e-5  
0.556, -5.430e-5  
0.555, -5.413e-5  
0.554, -5.392e-5  
0.553, -5.377e-5  
0.552, -5.362e-5  
0.551, -5.342e-5  
0.550, -5.325e-5  
0.549, -5.311e-5

0.548, -5.286e-5  
0.547, -5.273e-5  
0.546, -5.259e-5  
0.545, -5.236e-5  
0.544, -5.222e-5  
0.543, -5.205e-5  
0.542, -5.183e-5  
0.541, -5.166e-5  
0.540, -5.149e-5  
0.539, -5.127e-5  
0.538, -5.110e-5  
0.537, -5.094e-5  
0.536, -5.071e-5  
0.535, -5.051e-5  
0.534, -5.034e-5  
0.533, -5.009e-5  
0.532, -4.990e-5  
0.531, -4.972e-5  
0.530, -4.946e-5  
0.529, -4.929e-5  
0.528, -4.910e-5  
0.527, -4.881e-5  
0.526, -4.863e-5  
0.525, -4.845e-5  
0.524, -4.817e-5  
0.523, -4.797e-5  
0.522, -4.774e-5  
0.521, -4.745e-5  
0.520, -4.726e-5  
0.519, -4.703e-5  
0.518, -4.673e-5  
0.517, -4.652e-5  
0.516, -4.628e-5  
0.515, -4.595e-5  
0.514, -4.571e-5  
0.513, -4.547e-5  
0.512, -4.512e-5  
0.511, -4.486e-5  
0.510, -4.461e-5  
0.509, -4.426e-5  
0.508, -4.401e-5  
0.507, -4.376e-5  
0.506, -4.338e-5  
0.505, -4.314e-5  
0.504, -4.287e-5  
0.503, -4.249e-5  
0.502, -4.222e-5  
0.501, -4.196e-5  
0.500, -4.157e-5  
0.499, -4.127e-5

0.498, -4.102e-5  
0.497, -4.061e-5  
0.496, -4.032e-5  
0.495, -4.003e-5  
0.494, -3.962e-5  
0.493, -3.933e-5  
0.492, -3.903e-5  
0.491, -3.860e-5  
0.490, -3.833e-5  
0.489, -3.806e-5  
0.488, -3.766e-5  
0.487, -3.733e-5  
0.486, -3.705e-5  
0.485, -3.660e-5  
0.484, -3.628e-5  
0.483, -3.602e-5  
0.482, -3.555e-5  
0.481, -3.521e-5  
0.480, -3.490e-5  
0.479, -3.443e-5  
0.478, -3.409e-5  
0.477, -3.377e-5  
0.476, -3.328e-5  
0.475, -3.294e-5  
0.474, -3.260e-5  
0.473, -3.213e-5  
0.472, -3.178e-5  
0.471, -3.144e-5  
0.470, -3.098e-5  
0.469, -3.064e-5  
0.468, -3.031e-5  
0.467, -2.983e-5  
0.466, -2.949e-5  
0.465, -2.915e-5  
0.464, -2.868e-5  
0.463, -2.834e-5  
0.462, -2.803e-5  
0.461, -2.756e-5  
0.460, -2.722e-5  
0.459, -2.693e-5  
0.458, -2.643e-5  
0.457, -2.609e-5  
0.456, -2.580e-5  
0.455, -2.533e-5  
0.454, -2.501e-5  
0.453, -2.469e-5  
0.452, -2.423e-5  
0.451, -2.390e-5  
0.450, -2.362e-5  
0.449, -2.318e-5

0.448, -2.288e-5  
0.447, -2.257e-5  
0.446, -2.212e-5  
0.445, -2.182e-5  
0.444, -2.155e-5  
0.443, -2.114e-5  
0.442, -2.085e-5  
0.441, -2.059e-5  
0.440, -2.016e-5  
0.439, -1.987e-5  
0.438, -1.962e-5  
0.437, -1.923e-5  
0.436, -1.894e-5  
0.435, -1.871e-5  
0.434, -1.833e-5  
0.433, -1.806e-5  
0.432, -1.783e-5  
0.431, -1.743e-5  
0.430, -1.718e-5  
0.429, -1.697e-5  
0.428, -1.658e-5  
0.427, -1.637e-5  
0.426, -1.616e-5  
0.425, -1.579e-5  
0.424, -1.556e-5  
0.423, -1.534e-5  
0.422, -1.502e-5  
0.421, -1.479e-5  
0.420, -1.458e-5  
0.419, -1.422e-5  
0.418, -1.401e-5  
0.417, -1.383e-5  
0.416, -1.351e-5  
0.415, -1.328e-5  
0.414, -1.309e-5  
0.413, -1.278e-5  
0.412, -1.257e-5  
0.411, -1.239e-5  
0.410, -1.206e-5  
0.409, -1.184e-5  
0.408, -1.168e-5  
0.407, -1.139e-5  
0.406, -1.121e-5  
0.405, -1.104e-5  
0.404, -1.075e-5  
0.403, -1.055e-5  
0.402, -1.038e-5  
0.401, -1.010e-5  
0.400, -9.912e-6  
0.399, -9.738e-6

0.398, -9.462e-6  
0.397, -9.276e-6  
0.396, -9.143e-6  
0.395, -8.900e-6  
0.394, -8.715e-6  
0.393, -8.584e-6  
0.392, -8.337e-6  
0.391, -8.147e-6  
0.390, -8.035e-6  
0.389, -7.785e-6  
0.388, -7.609e-6  
0.387, -7.477e-6  
0.386, -7.217e-6  
0.385, -7.049e-6  
0.384, -6.938e-6  
0.383, -6.727e-6  
0.382, -6.585e-6  
0.381, -6.460e-6  
0.380, -6.237e-6  
0.379, -6.091e-6  
0.378, -5.964e-6  
0.377, -5.743e-6  
0.376, -5.601e-6  
0.375, -5.477e-6  
0.374, -5.265e-6  
0.373, -5.110e-6  
0.372, -4.979e-6  
0.371, -4.795e-6  
0.370, -4.644e-6  
0.369, -4.531e-6  
0.368, -4.360e-6  
0.367, -4.239e-6  
0.366, -4.133e-6  
0.365, -3.949e-6  
0.364, -3.812e-6  
0.363, -3.729e-6  
0.362, -3.564e-6  
0.361, -3.442e-6  
0.360, -3.337e-6  
0.359, -3.151e-6  
0.358, -3.029e-6  
0.357, -2.940e-6  
0.356, -2.769e-6  
0.355, -2.649e-6  
0.354, -2.567e-6  
0.353, -2.408e-6  
0.352, -2.289e-6  
0.351, -2.202e-6  
0.350, -2.036e-6  
0.349, -1.914e-6

0.348, -1.844e-6  
0.347, -1.718e-6  
0.346, -1.613e-6  
0.345, -1.536e-6  
0.344, -1.396e-6  
0.343, -1.297e-6  
0.342, -1.217e-6  
0.341, -1.066e-6  
0.340, -9.791e-7  
0.339, -9.034e-7  
0.338, -7.688e-7  
0.337, -6.647e-7  
0.336, -6.087e-7  
0.335, -4.662e-7  
0.334, -3.788e-7  
0.333, -3.071e-7  
0.332, -1.647e-7  
0.331, -8.115e-8  
0.330, -3.104e-8  
0.329, 1.144e-7  
0.328, 2.185e-7  
0.327, 2.715e-7  
0.326, 3.776e-7  
0.325, 4.552e-7  
0.324, 5.319e-7  
0.323, 6.517e-7  
0.322, 7.333e-7  
0.321, 7.883e-7  
0.320, 9.170e-7  
0.319, 1.005e-6  
0.318, 1.051e-6  
0.317, 1.180e-6  
0.316, 1.258e-6  
0.315, 1.303e-6  
0.314, 1.446e-6  
0.313, 1.512e-6  
0.312, 1.556e-6  
0.311, 1.673e-6  
0.310, 1.733e-6  
0.309, 1.777e-6  
0.308, 1.906e-6  
0.307, 2.003e-6  
0.306, 2.038e-6  
0.305, 2.178e-6  
0.304, 2.246e-6  
0.303, 2.281e-6  
0.302, 2.391e-6  
0.301, 2.462e-6  
0.300, 2.522e-6  
0.299, 2.624e-6

0.298, 2.690e-6  
0.297, 2.729e-6  
0.296, 2.842e-6  
0.295, 2.920e-6  
0.294, 2.965e-6  
0.293, 3.107e-6  
0.292, 3.164e-6  
0.291, 3.200e-6  
0.290, 3.324e-6  
0.289, 3.389e-6  
0.288, 3.415e-6  
0.287, 3.546e-6  
0.286, 3.608e-6  
0.285, 3.658e-6  
0.284, 3.765e-6  
0.283, 3.824e-6  
0.282, 3.878e-6  
0.281, 3.972e-6  
0.280, 4.036e-6  
0.279, 4.089e-6  
0.278, 4.181e-6  
0.277, 4.241e-6  
0.276, 4.288e-6  
0.275, 4.389e-6  
0.274, 4.447e-6  
0.273, 4.482e-6  
0.272, 4.606e-6  
0.271, 4.694e-6  
0.270, 4.706e-6  
0.269, 4.825e-6  
0.268, 4.879e-6  
0.267, 4.904e-6  
0.266, 5.033e-6  
0.265, 5.126e-6  
0.264, 5.157e-6  
0.263, 5.250e-6  
0.262, 5.308e-6  
0.261, 5.339e-6  
0.260, 5.442e-6  
0.259, 5.516e-6  
0.258, 5.556e-6  
0.257, 5.670e-6  
0.256, 5.745e-6  
0.255, 5.779e-6  
0.254, 5.893e-6  
0.253, 5.991e-6  
0.252, 6.040e-6  
0.251, 6.146e-6  
0.250, 6.182e-6  
0.249, 6.231e-6



0.248, 6.329e-6  
0.247, 6.405e-6  
0.246, 6.437e-6  
0.245, 6.540e-6  
0.244, 6.617e-6  
0.243, 6.650e-6  
0.242, 6.756e-6  
0.241, 6.832e-6  
0.240, 6.880e-6  
0.239, 6.996e-6  
0.238, 7.084e-6  
0.237, 7.129e-6  
0.236, 7.243e-6  
0.235, 7.310e-6  
0.234, 7.364e-6  
0.233, 7.467e-6  
0.232, 7.536e-6  
0.231, 7.559e-6  
0.230, 7.662e-6  
0.229, 7.732e-6  
0.228, 7.764e-6  
0.227, 7.896e-6  
0.226, 7.986e-6  
0.225, 8.015e-6  
0.224, 8.127e-6  
0.223, 8.201e-6  
0.222, 8.245e-6  
0.221, 8.372e-6  
0.220, 8.438e-6  
0.219, 8.480e-6  
0.218, 8.595e-6  
0.217, 8.665e-6  
0.216, 8.693e-6  
0.215, 8.815e-6  
0.214, 8.900e-6  
0.213, 8.935e-6  
0.212, 9.059e-6  
0.211, 9.135e-6  
0.210, 9.176e-6  
0.209, 9.303e-6  
0.208, 9.382e-6  
0.207, 9.429e-6  
0.206, 9.558e-6  
0.205, 9.637e-6  
0.204, 9.675e-6  
0.203, 9.798e-6  
0.202, 9.898e-6  
0.201, 9.946e-6  
0.200, 1.007e-5  
0.199, 1.014e-5

0.198, 1.016e-5  
0.197, 1.029e-5  
0.196, 1.038e-5  
0.195, 1.041e-5  
0.194, 1.056e-5  
0.193, 1.065e-5  
0.192, 1.069e-5  
0.191, 1.082e-5  
0.190, 1.090e-5  
0.189, 1.093e-5  
0.188, 1.106e-5  
0.187, 1.115e-5  
0.186, 1.120e-5  
0.185, 1.134e-5  
0.184, 1.143e-5  
0.183, 1.148e-5  
0.182, 1.162e-5  
0.181, 1.174e-5  
0.180, 1.177e-5  
0.179, 1.191e-5  
0.178, 1.202e-5  
0.177, 1.207e-5  
0.176, 1.220e-5  
0.175, 1.231e-5  
0.174, 1.234e-5  
0.173, 1.251e-5  
0.172, 1.259e-5  
0.171, 1.264e-5  
0.170, 1.281e-5  
0.169, 1.291e-5  
0.168, 1.296e-5  
0.167, 1.311e-5  
0.166, 1.321e-5  
0.165, 1.327e-5  
0.164, 1.343e-5  
0.163, 1.354e-5  
0.162, 1.362e-5  
0.161, 1.378e-5  
0.160, 1.391e-5  
0.159, 1.398e-5  
0.158, 1.414e-5  
0.157, 1.426e-5  
0.156, 1.433e-5  
0.155, 1.449e-5  
0.154, 1.463e-5  
0.153, 1.470e-5  
0.152, 1.491e-5  
0.151, 1.503e-5  
0.150, 1.510e-5  
0.149, 1.532e-5

0.148, 1.546e-5  
0.147, 1.551e-5  
0.146, 1.573e-5  
0.145, 1.588e-5  
0.144, 1.598e-5  
0.143, 1.619e-5  
0.142, 1.636e-5  
0.141, 1.645e-5  
0.140, 1.669e-5  
0.139, 1.686e-5  
0.138, 1.697e-5  
0.137, 1.721e-5  
0.136, 1.738e-5  
0.135, 1.750e-5  
0.134, 1.776e-5  
0.133, 1.794e-5  
0.132, 1.806e-5  
0.131, 1.831e-5  
0.130, 1.851e-5  
0.129, 1.864e-5  
0.128, 1.891e-5  
0.127, 1.912e-5  
0.126, 1.924e-5  
0.125, 1.951e-5  
0.124, 1.973e-5  
0.123, 1.986e-5  
0.122, 2.015e-5  
0.121, 2.040e-5  
0.120, 2.056e-5  
0.119, 2.086e-5  
0.118, 2.109e-5  
0.117, 2.123e-5  
0.116, 2.153e-5  
0.115, 2.177e-5  
0.114, 2.193e-5  
0.113, 2.224e-5  
0.112, 2.249e-5  
0.111, 2.267e-5  
0.110, 2.300e-5  
0.109, 2.330e-5  
0.108, 2.348e-5  
0.107, 2.384e-5  
0.106, 2.414e-5  
0.105, 2.433e-5  
0.104, 2.467e-5  
0.103, 2.497e-5  
0.102, 2.517e-5  
0.101, 2.557e-5  
0.100, 2.586e-5  
0.099, 2.605e-5

0.098, 2.643e-5  
0.097, 2.673e-5  
0.096, 2.693e-5  
0.095, 2.733e-5  
0.094, 2.764e-5  
0.093, 2.786e-5  
0.092, 2.827e-5  
0.091, 2.858e-5  
0.090, 2.881e-5  
0.089, 2.922e-5  
0.088, 2.955e-5  
0.087, 2.977e-5  
0.086, 3.018e-5  
0.085, 3.051e-5  
0.084, 3.074e-5  
0.083, 3.115e-5  
0.082, 3.151e-5  
0.081, 3.174e-5  
0.080, 3.214e-5  
0.079, 3.249e-5  
0.078, 3.269e-5  
0.077, 3.311e-5  
0.076, 3.344e-5  
0.075, 3.365e-5  
0.074, 3.406e-5  
0.073, 3.441e-5  
0.072, 3.465e-5  
0.071, 3.507e-5  
0.070, 3.537e-5  
0.069, 3.558e-5  
0.068, 3.598e-5  
0.067, 3.630e-5  
0.066, 3.653e-5  
0.065, 3.694e-5  
0.064, 3.726e-5  
0.063, 3.748e-5  
0.062, 3.787e-5  
0.061, 3.822e-5  
0.060, 3.845e-5  
0.059, 3.886e-5  
0.058, 3.917e-5  
0.057, 3.936e-5  
0.056, 3.975e-5  
0.055, 4.007e-5  
0.054, 4.026e-5  
0.053, 4.064e-5  
0.052, 4.098e-5  
0.051, 4.119e-5  
0.050, 4.155e-5  
0.049, 4.186e-5

0.048, 4.206e-5  
0.047, 4.242e-5  
0.046, 4.271e-5  
0.045, 4.290e-5  
0.044, 4.325e-5  
0.043, 4.356e-5  
0.042, 4.373e-5  
0.041, 4.411e-5  
0.040, 4.441e-5  
0.039, 4.459e-5  
0.038, 4.495e-5  
0.037, 4.524e-5  
0.036, 4.543e-5  
0.035, 4.577e-5  
0.034, 4.605e-5  
0.033, 4.623e-5  
0.032, 4.657e-5  
0.031, 4.686e-5  
0.030, 4.704e-5  
0.029, 4.740e-5  
0.028, 4.768e-5  
0.027, 4.783e-5  
0.026, 4.816e-5  
0.025, 4.843e-5  
0.024, 4.860e-5  
0.023, 4.894e-5  
0.022, 4.921e-5  
0.021, 4.941e-5  
0.020, 4.974e-5  
0.019, 5.001e-5  
0.018, 5.017e-5  
0.017, 5.049e-5  
0.016, 5.077e-5  
0.015, 5.095e-5  
0.014, 5.131e-5  
0.013, 5.158e-5  
0.012, 5.174e-5  
0.011, 5.207e-5  
0.010, 5.235e-5  
0.009, 5.252e-5  
0.008, 5.283e-5  
0.007, 5.311e-5  
0.006, 5.330e-5  
0.005, 5.362e-5  
0.004, 5.389e-5  
0.003, 5.407e-5  
0.002, 5.439e-5  
0.001, 5.467e-5  
0.000, 5.487e-5  
-0.001, 5.520e-5

-0.002, 5.548e-5  
-0.003, 5.566e-5  
-0.004, 5.598e-5  
-0.005, 5.626e-5  
-0.006, 5.644e-5  
-0.007, 5.676e-5  
-0.008, 5.703e-5  
-0.009, 5.721e-5  
-0.010, 5.756e-5  
-0.011, 5.785e-5  
-0.012, 5.802e-5  
-0.013, 5.835e-5  
-0.014, 5.863e-5  
-0.015, 5.882e-5  
-0.016, 5.915e-5  
-0.017, 5.943e-5  
-0.018, 5.959e-5  
-0.019, 5.994e-5  
-0.020, 6.024e-5  
-0.021, 6.040e-5  
-0.022, 6.074e-5  
-0.023, 6.102e-5  
-0.024, 6.119e-5  
-0.025, 6.152e-5  
-0.026, 6.182e-5  
-0.027, 6.201e-5  
-0.028, 6.233e-5  
-0.029, 6.263e-5  
-0.030, 6.282e-5  
-0.031, 6.316e-5  
-0.032, 6.345e-5  
-0.033, 6.365e-5  
-0.034, 6.401e-5  
-0.035, 6.432e-5  
-0.036, 6.455e-5  
-0.037, 6.492e-5  
-0.038, 6.523e-5  
-0.039, 6.541e-5  
-0.040, 6.575e-5  
-0.041, 6.606e-5  
-0.042, 6.626e-5  
-0.043, 6.663e-5  
-0.044, 6.695e-5  
-0.045, 6.717e-5  
-0.046, 6.755e-5  
-0.047, 6.787e-5  
-0.048, 6.810e-5  
-0.049, 6.846e-5  
-0.050, 6.876e-5  
-0.051, 6.896e-5

-0.052, 6.933e-5  
-0.053, 6.964e-5  
-0.054, 6.988e-5  
-0.055, 7.032e-5  
-0.056, 7.063e-5  
-0.057, 7.084e-5  
-0.058, 7.122e-5  
-0.059, 7.156e-5  
-0.060, 7.175e-5  
-0.061, 7.212e-5  
-0.062, 7.246e-5  
-0.063, 7.267e-5  
-0.064, 7.304e-5  
-0.065, 7.338e-5  
-0.066, 7.358e-5  
-0.067, 7.397e-5  
-0.068, 7.430e-5  
-0.069, 7.451e-5  
-0.070, 7.491e-5  
-0.071, 7.523e-5  
-0.072, 7.544e-5  
-0.073, 7.584e-5  
-0.074, 7.618e-5  
-0.075, 7.641e-5  
-0.076, 7.682e-5  
-0.077, 7.716e-5  
-0.078, 7.742e-5  
-0.079, 7.782e-5  
-0.080, 7.819e-5  
-0.081, 7.840e-5  
-0.082, 7.880e-5  
-0.083, 7.917e-5  
-0.084, 7.940e-5  
-0.085, 7.981e-5  
-0.086, 8.019e-5  
-0.087, 8.044e-5  
-0.088, 8.084e-5  
-0.089, 8.126e-5  
-0.090, 8.153e-5  
-0.091, 8.193e-5  
-0.092, 8.229e-5  
-0.093, 8.251e-5  
-0.094, 8.298e-5  
-0.095, 8.339e-5  
-0.096, 8.368e-5  
-0.097, 8.411e-5  
-0.098, 8.447e-5  
-0.099, 8.472e-5  
-0.100, 8.513e-5  
-0.101, 8.551e-5

-0.102, 8.576e-5  
-0.103, 8.619e-5  
-0.104, 8.655e-5  
-0.105, 8.679e-5  
-0.106, 8.726e-5  
-0.107, 8.764e-5  
-0.108, 8.791e-5  
-0.109, 8.834e-5  
-0.110, 8.871e-5  
-0.111, 8.899e-5  
-0.112, 8.940e-5  
-0.113, 8.978e-5  
-0.114, 9.002e-5  
-0.115, 9.047e-5  
-0.116, 9.090e-5  
-0.117, 9.116e-5  
-0.118, 9.162e-5  
-0.119, 9.203e-5  
-0.120, 9.229e-5  
-0.121, 9.273e-5  
-0.122, 9.313e-5  
-0.123, 9.342e-5  
-0.124, 9.389e-5  
-0.125, 9.430e-5  
-0.126, 9.453e-5  
-0.127, 9.493e-5  
-0.128, 9.530e-5  
-0.129, 9.557e-5  
-0.130, 9.604e-5  
-0.131, 9.647e-5  
-0.132, 9.676e-5  
-0.133, 9.724e-5  
-0.134, 9.768e-5  
-0.135, 9.798e-5  
-0.136, 9.845e-5  
-0.137, 9.887e-5  
-0.138, 9.914e-5  
-0.139, 9.960e-5  
-0.140, 1.000e-4  
-0.141, 1.003e-4  
-0.142, 1.007e-4  
-0.143, 1.011e-4  
-0.144, 1.014e-4  
-0.145, 1.019e-4  
-0.146, 1.023e-4  
-0.147, 1.026e-4  
-0.148, 1.030e-4  
-0.149, 1.035e-4  
-0.150, 1.038e-4  
-0.151, 1.043e-4



-0.152, 1.047e-4  
-0.153, 1.050e-4  
-0.154, 1.055e-4  
-0.155, 1.059e-4  
-0.156, 1.062e-4  
-0.157, 1.066e-4  
-0.158, 1.071e-4  
-0.159, 1.074e-4  
-0.160, 1.078e-4  
-0.161, 1.082e-4  
-0.162, 1.085e-4  
-0.163, 1.090e-4  
-0.164, 1.095e-4  
-0.165, 1.098e-4  
-0.166, 1.103e-4  
-0.167, 1.107e-4  
-0.168, 1.110e-4  
-0.169, 1.115e-4  
-0.170, 1.119e-4  
-0.171, 1.122e-4  
-0.172, 1.127e-4  
-0.173, 1.131e-4  
-0.174, 1.134e-4  
-0.175, 1.139e-4  
-0.176, 1.144e-4  
-0.177, 1.147e-4  
-0.178, 1.152e-4  
-0.179, 1.156e-4  
-0.180, 1.160e-4  
-0.181, 1.165e-4  
-0.182, 1.170e-4  
-0.183, 1.173e-4  
-0.184, 1.178e-4  
-0.185, 1.183e-4  
-0.186, 1.185e-4  
-0.187, 1.190e-4  
-0.188, 1.194e-4  
-0.189, 1.197e-4  
-0.190, 1.202e-4  
-0.191, 1.206e-4  
-0.192, 1.209e-4  
-0.193, 1.214e-4  
-0.194, 1.218e-4  
-0.195, 1.221e-4  
-0.196, 1.226e-4  
-0.197, 1.231e-4  
-0.198, 1.234e-4  
-0.199, 1.239e-4  
-0.200, 1.244e-4  
-0.201, 1.247e-4

-0.202, 1.252e-4  
-0.203, 1.257e-4  
-0.204, 1.260e-4  
-0.205, 1.265e-4  
-0.206, 1.270e-4  
-0.207, 1.273e-4  
-0.208, 1.278e-4  
-0.209, 1.283e-4  
-0.210, 1.286e-4  
-0.211, 1.291e-4  
-0.212, 1.296e-4  
-0.213, 1.298e-4  
-0.214, 1.304e-4  
-0.215, 1.309e-4  
-0.216, 1.312e-4  
-0.217, 1.317e-4  
-0.218, 1.321e-4  
-0.219, 1.324e-4  
-0.220, 1.329e-4  
-0.221, 1.334e-4  
-0.222, 1.337e-4  
-0.223, 1.342e-4  
-0.224, 1.347e-4  
-0.225, 1.350e-4  
-0.226, 1.355e-4  
-0.227, 1.361e-4  
-0.228, 1.364e-4  
-0.229, 1.369e-4  
-0.230, 1.374e-4  
-0.231, 1.377e-4  
-0.232, 1.382e-4  
-0.233, 1.387e-4  
-0.234, 1.389e-4  
-0.235, 1.394e-4  
-0.236, 1.399e-4  
-0.237, 1.402e-4  
-0.238, 1.408e-4  
-0.239, 1.413e-4  
-0.240, 1.417e-4  
-0.241, 1.423e-4  
-0.242, 1.428e-4  
-0.243, 1.432e-4  
-0.244, 1.437e-4  
-0.245, 1.441e-4  
-0.246, 1.444e-4  
-0.247, 1.449e-4  
-0.248, 1.453e-4  
-0.249, 1.456e-4  
-0.250, 1.461e-4  
-0.251, 1.467e-4

-0.252, 1.470e-4  
-0.253, 1.476e-4  
-0.254, 1.481e-4  
-0.255, 1.485e-4  
-0.256, 1.490e-4  
-0.257, 1.495e-4  
-0.258, 1.498e-4  
-0.259, 1.504e-4  
-0.260, 1.509e-4  
-0.261, 1.512e-4  
-0.262, 1.517e-4  
-0.263, 1.523e-4  
-0.264, 1.526e-4  
-0.265, 1.531e-4  
-0.266, 1.537e-4  
-0.267, 1.540e-4  
-0.268, 1.545e-4  
-0.269, 1.550e-4  
-0.270, 1.553e-4  
-0.271, 1.558e-4  
-0.272, 1.563e-4  
-0.273, 1.566e-4  
-0.274, 1.570e-4  
-0.275, 1.576e-4  
-0.276, 1.579e-4  
-0.277, 1.584e-4  
-0.278, 1.589e-4  
-0.279, 1.592e-4  
-0.280, 1.598e-4  
-0.281, 1.604e-4  
-0.282, 1.607e-4  
-0.283, 1.612e-4  
-0.284, 1.618e-4  
-0.285, 1.622e-4  
-0.286, 1.627e-4  
-0.287, 1.633e-4  
-0.288, 1.636e-4  
-0.289, 1.642e-4  
-0.290, 1.647e-4  
-0.291, 1.650e-4  
-0.292, 1.655e-4  
-0.293, 1.660e-4  
-0.294, 1.663e-4  
-0.295, 1.668e-4  
-0.296, 1.673e-4  
-0.297, 1.676e-4  
-0.298, 1.682e-4  
-0.299, 1.687e-4  
-0.300, 1.690e-4  
-0.301, 1.695e-4

-0.302, 1.700e-4  
-0.303, 1.703e-4  
-0.304, 1.707e-4  
-0.305, 1.712e-4  
-0.306, 1.714e-4  
-0.307, 1.719e-4  
-0.308, 1.724e-4  
-0.309, 1.727e-4  
-0.310, 1.731e-4  
-0.311, 1.736e-4  
-0.312, 1.738e-4  
-0.313, 1.742e-4  
-0.314, 1.747e-4  
-0.315, 1.749e-4  
-0.316, 1.754e-4  
-0.317, 1.758e-4  
-0.318, 1.761e-4  
-0.319, 1.765e-4  
-0.320, 1.769e-4  
-0.321, 1.772e-4  
-0.322, 1.775e-4  
-0.323, 1.780e-4  
-0.324, 1.782e-4  
-0.325, 1.786e-4  
-0.326, 1.790e-4  
-0.327, 1.792e-4  
-0.328, 1.796e-4  
-0.329, 1.801e-4  
-0.330, 1.803e-4  
-0.331, 1.807e-4  
-0.332, 1.811e-4  
-0.333, 1.814e-4  
-0.334, 1.818e-4  
-0.335, 1.822e-4  
-0.336, 1.824e-4  
-0.337, 1.828e-4  
-0.338, 1.832e-4  
-0.339, 1.834e-4  
-0.340, 1.839e-4  
-0.341, 1.843e-4  
-0.342, 1.845e-4  
-0.343, 1.849e-4  
-0.344, 1.853e-4  
-0.345, 1.854e-4  
-0.346, 1.858e-4  
-0.347, 1.862e-4  
-0.348, 1.864e-4  
-0.349, 1.867e-4  
-0.350, 1.872e-4  
-0.351, 1.874e-4

-0.352, 1.877e-4  
-0.353, 1.880e-4  
-0.354, 1.881e-4  
-0.355, 1.883e-4  
-0.356, 1.886e-4  
-0.357, 1.887e-4  
-0.358, 1.891e-4  
-0.359, 1.895e-4  
-0.360, 1.896e-4  
-0.361, 1.900e-4  
-0.362, 1.904e-4  
-0.363, 1.906e-4  
-0.364, 1.909e-4  
-0.365, 1.913e-4  
-0.366, 1.914e-4  
-0.367, 1.918e-4  
-0.368, 1.921e-4  
-0.369, 1.923e-4  
-0.370, 1.926e-4  
-0.371, 1.929e-4  
-0.372, 1.931e-4  
-0.373, 1.934e-4  
-0.374, 1.937e-4  
-0.375, 1.938e-4  
-0.376, 1.941e-4  
-0.377, 1.944e-4  
-0.378, 1.945e-4  
-0.379, 1.949e-4  
-0.380, 1.952e-4  
-0.381, 1.953e-4  
-0.382, 1.956e-4  
-0.383, 1.959e-4  
-0.384, 1.960e-4  
-0.385, 1.963e-4  
-0.386, 1.966e-4  
-0.387, 1.967e-4  
-0.388, 1.970e-4  
-0.389, 1.973e-4  
-0.390, 1.974e-4  
-0.391, 1.977e-4  
-0.392, 1.980e-4  
-0.393, 1.982e-4  
-0.394, 1.985e-4  
-0.395, 1.987e-4  
-0.396, 1.988e-4  
-0.397, 1.990e-4  
-0.398, 1.993e-4  
-0.399, 1.994e-4

Mar. 30, 2021 03:35:28

Linear Sweep Voltammetry

File: c:\users\shadji04\desktop\sofia cv\30032021\complex 6 sweep experiment inder  
o2\1000 rpm\_25 mv rate.txt

Data Source: Experiment

Instrument Model: CHI650E

Header:

Note: 1000 rpm

Init E (V) = 0.8

Final E (V) = -0.4

Scan Rate (V/s) = 0.025

Sample Interval (V) = 0.001

Quiet Time (sec) = 2

Sensitivity (A/V) = 0.001

Potential/V, Current/A

0.800, -1.175e-4

0.799, -1.172e-4

0.798, -1.170e-4

0.797, -1.169e-4

0.796, -1.166e-4

0.795, -1.163e-4

0.794, -1.161e-4

0.793, -1.157e-4

0.792, -1.154e-4

0.791, -1.153e-4

0.790, -1.152e-4

0.789, -1.150e-4

0.788, -1.147e-4

0.787, -1.143e-4

0.786, -1.141e-4

0.785, -1.138e-4

0.784, -1.135e-4

0.783, -1.133e-4

0.782, -1.132e-4

0.781, -1.130e-4

0.780, -1.127e-4

0.779, -1.124e-4

0.778, -1.123e-4

0.777, -1.122e-4

0.776, -1.119e-4

0.775, -1.115e-4

0.774, -1.112e-4

0.773, -1.109e-4

0.772, -1.106e-4

0.771, -1.104e-4

0.770, -1.102e-4

0.769, -1.101e-4

0.768, -1.100e-4

0.767, -1.099e-4

0.766, -1.099e-4

0.765, -1.097e-4

0.764, -1.093e-4

0.763, -1.089e-4  
0.762, -1.086e-4  
0.761, -1.085e-4  
0.760, -1.085e-4  
0.759, -1.083e-4  
0.758, -1.080e-4  
0.757, -1.076e-4  
0.756, -1.075e-4  
0.755, -1.077e-4  
0.754, -1.077e-4  
0.753, -1.076e-4  
0.752, -1.073e-4  
0.751, -1.069e-4  
0.750, -1.067e-4  
0.749, -1.066e-4  
0.748, -1.064e-4  
0.747, -1.062e-4  
0.746, -1.059e-4  
0.745, -1.057e-4  
0.744, -1.055e-4  
0.743, -1.052e-4  
0.742, -1.050e-4  
0.741, -1.048e-4  
0.740, -1.047e-4  
0.739, -1.045e-4  
0.738, -1.042e-4  
0.737, -1.040e-4  
0.736, -1.038e-4  
0.735, -1.038e-4  
0.734, -1.037e-4  
0.733, -1.036e-4  
0.732, -1.034e-4  
0.731, -1.030e-4  
0.730, -1.026e-4  
0.729, -1.025e-4  
0.728, -1.024e-4  
0.727, -1.022e-4  
0.726, -1.020e-4  
0.725, -1.018e-4  
0.724, -1.016e-4  
0.723, -1.013e-4  
0.722, -1.010e-4  
0.721, -1.007e-4  
0.720, -1.006e-4  
0.719, -1.007e-4  
0.718, -1.008e-4  
0.717, -1.007e-4  
0.716, -1.006e-4  
0.715, -1.002e-4  
0.714, -9.991e-5

0.713, -9.959e-5  
0.712, -9.939e-5  
0.711, -9.936e-5  
0.710, -9.942e-5  
0.709, -9.940e-5  
0.708, -9.932e-5  
0.707, -9.917e-5  
0.706, -9.892e-5  
0.705, -9.867e-5  
0.704, -9.838e-5  
0.703, -9.811e-5  
0.702, -9.784e-5  
0.701, -9.750e-5  
0.700, -9.742e-5  
0.699, -9.731e-5  
0.698, -9.709e-5  
0.697, -9.692e-5  
0.696, -9.680e-5  
0.695, -9.666e-5  
0.694, -9.646e-5  
0.693, -9.620e-5  
0.692, -9.596e-5  
0.691, -9.575e-5  
0.690, -9.558e-5  
0.689, -9.547e-5  
0.688, -9.542e-5  
0.687, -9.539e-5  
0.686, -9.524e-5  
0.685, -9.492e-5  
0.684, -9.473e-5  
0.683, -9.451e-5  
0.682, -9.408e-5  
0.681, -9.361e-5  
0.680, -9.332e-5  
0.679, -9.314e-5  
0.678, -9.299e-5  
0.677, -9.302e-5  
0.676, -9.295e-5  
0.675, -9.268e-5  
0.674, -9.243e-5  
0.673, -9.220e-5  
0.672, -9.191e-5  
0.671, -9.162e-5  
0.670, -9.142e-5  
0.669, -9.132e-5  
0.668, -9.123e-5  
0.667, -9.111e-5  
0.666, -9.103e-5  
0.665, -9.084e-5  
0.664, -9.052e-5



0.663, -9.021e-5  
0.662, -8.997e-5  
0.661, -8.980e-5  
0.660, -8.961e-5  
0.659, -8.944e-5  
0.658, -8.920e-5  
0.657, -8.898e-5  
0.656, -8.877e-5  
0.655, -8.858e-5  
0.654, -8.851e-5  
0.653, -8.851e-5  
0.652, -8.846e-5  
0.651, -8.841e-5  
0.650, -8.825e-5  
0.649, -8.802e-5  
0.648, -8.780e-5  
0.647, -8.756e-5  
0.646, -8.722e-5  
0.645, -8.682e-5  
0.644, -8.650e-5  
0.643, -8.626e-5  
0.642, -8.611e-5  
0.641, -8.606e-5  
0.640, -8.608e-5  
0.639, -8.586e-5  
0.638, -8.578e-5  
0.637, -8.566e-5  
0.636, -8.548e-5  
0.635, -8.529e-5  
0.634, -8.506e-5  
0.633, -8.473e-5  
0.632, -8.443e-5  
0.631, -8.417e-5  
0.630, -8.389e-5  
0.629, -8.361e-5  
0.628, -8.337e-5  
0.627, -8.319e-5  
0.626, -8.298e-5  
0.625, -8.288e-5  
0.624, -8.286e-5  
0.623, -8.287e-5  
0.622, -8.273e-5  
0.621, -8.245e-5  
0.620, -8.229e-5  
0.619, -8.215e-5  
0.618, -8.198e-5  
0.617, -8.173e-5  
0.616, -8.151e-5  
0.615, -8.136e-5  
0.614, -8.124e-5

0.613, -8.106e-5  
0.612, -8.084e-5  
0.611, -8.067e-5  
0.610, -8.053e-5  
0.609, -8.035e-5  
0.608, -8.018e-5  
0.607, -8.001e-5  
0.606, -7.977e-5  
0.605, -7.961e-5  
0.604, -7.953e-5  
0.603, -7.946e-5  
0.602, -7.932e-5  
0.601, -7.917e-5  
0.600, -7.903e-5  
0.599, -7.883e-5  
0.598, -7.864e-5  
0.597, -7.843e-5  
0.596, -7.821e-5  
0.595, -7.802e-5  
0.594, -7.788e-5  
0.593, -7.773e-5  
0.592, -7.759e-5  
0.591, -7.744e-5  
0.590, -7.729e-5  
0.589, -7.711e-5  
0.588, -7.690e-5  
0.587, -7.673e-5  
0.586, -7.654e-5  
0.585, -7.630e-5  
0.584, -7.603e-5  
0.583, -7.585e-5  
0.582, -7.567e-5  
0.581, -7.549e-5  
0.580, -7.537e-5  
0.579, -7.532e-5  
0.578, -7.525e-5  
0.577, -7.512e-5  
0.576, -7.498e-5  
0.575, -7.477e-5  
0.574, -7.459e-5  
0.573, -7.448e-5  
0.572, -7.438e-5  
0.571, -7.420e-5  
0.570, -7.398e-5  
0.569, -7.377e-5  
0.568, -7.355e-5  
0.567, -7.335e-5  
0.566, -7.317e-5  
0.565, -7.300e-5  
0.564, -7.279e-5

0.563, -7.264e-5  
0.562, -7.247e-5  
0.561, -7.226e-5  
0.560, -7.200e-5  
0.559, -7.174e-5  
0.558, -7.151e-5  
0.557, -7.135e-5  
0.556, -7.116e-5  
0.555, -7.092e-5  
0.554, -7.074e-5  
0.553, -7.060e-5  
0.552, -7.036e-5  
0.551, -7.014e-5  
0.550, -6.996e-5  
0.549, -6.977e-5  
0.548, -6.962e-5  
0.547, -6.940e-5  
0.546, -6.911e-5  
0.545, -6.888e-5  
0.544, -6.872e-5  
0.543, -6.859e-5  
0.542, -6.848e-5  
0.541, -6.813e-5  
0.540, -6.771e-5  
0.539, -6.740e-5  
0.538, -6.721e-5  
0.537, -6.716e-5  
0.536, -6.682e-5  
0.535, -6.644e-5  
0.534, -6.612e-5  
0.533, -6.586e-5  
0.532, -6.557e-5  
0.531, -6.525e-5  
0.530, -6.494e-5  
0.529, -6.470e-5  
0.528, -6.442e-5  
0.527, -6.406e-5  
0.526, -6.376e-5  
0.525, -6.353e-5  
0.524, -6.328e-5  
0.523, -6.292e-5  
0.522, -6.255e-5  
0.521, -6.225e-5  
0.520, -6.196e-5  
0.519, -6.161e-5  
0.518, -6.127e-5  
0.517, -6.102e-5  
0.516, -6.077e-5  
0.515, -6.049e-5  
0.514, -6.016e-5

0.513, -5.976e-5  
0.512, -5.932e-5  
0.511, -5.891e-5  
0.510, -5.849e-5  
0.509, -5.810e-5  
0.508, -5.769e-5  
0.507, -5.732e-5  
0.506, -5.700e-5  
0.505, -5.669e-5  
0.504, -5.632e-5  
0.503, -5.591e-5  
0.502, -5.548e-5  
0.501, -5.512e-5  
0.500, -5.481e-5  
0.499, -5.445e-5  
0.498, -5.401e-5  
0.497, -5.359e-5  
0.496, -5.318e-5  
0.495, -5.273e-5  
0.494, -5.237e-5  
0.493, -5.202e-5  
0.492, -5.165e-5  
0.491, -5.128e-5  
0.490, -5.081e-5  
0.489, -5.033e-5  
0.488, -4.990e-5  
0.487, -4.950e-5  
0.486, -4.916e-5  
0.485, -4.883e-5  
0.484, -4.835e-5  
0.483, -4.772e-5  
0.482, -4.717e-5  
0.481, -4.669e-5  
0.480, -4.615e-5  
0.479, -4.565e-5  
0.478, -4.518e-5  
0.477, -4.466e-5  
0.476, -4.416e-5  
0.475, -4.368e-5  
0.474, -4.316e-5  
0.473, -4.273e-5  
0.472, -4.227e-5  
0.471, -4.178e-5  
0.470, -4.127e-5  
0.469, -4.073e-5  
0.468, -4.019e-5  
0.467, -3.968e-5  
0.466, -3.921e-5  
0.465, -3.871e-5  
0.464, -3.822e-5

0.463, -3.768e-5  
0.462, -3.715e-5  
0.461, -3.674e-5  
0.460, -3.632e-5  
0.459, -3.590e-5  
0.458, -3.544e-5  
0.457, -3.497e-5  
0.456, -3.448e-5  
0.455, -3.397e-5  
0.454, -3.352e-5  
0.453, -3.310e-5  
0.452, -3.265e-5  
0.451, -3.215e-5  
0.450, -3.163e-5  
0.449, -3.116e-5  
0.448, -3.071e-5  
0.447, -3.024e-5  
0.446, -2.981e-5  
0.445, -2.936e-5  
0.444, -2.893e-5  
0.443, -2.853e-5  
0.442, -2.810e-5  
0.441, -2.766e-5  
0.440, -2.731e-5  
0.439, -2.694e-5  
0.438, -2.650e-5  
0.437, -2.605e-5  
0.436, -2.563e-5  
0.435, -2.519e-5  
0.434, -2.475e-5  
0.433, -2.433e-5  
0.432, -2.392e-5  
0.431, -2.355e-5  
0.430, -2.319e-5  
0.429, -2.283e-5  
0.428, -2.244e-5  
0.427, -2.206e-5  
0.426, -2.166e-5  
0.425, -2.129e-5  
0.424, -2.095e-5  
0.423, -2.057e-5  
0.422, -2.020e-5  
0.421, -1.980e-5  
0.420, -1.941e-5  
0.419, -1.908e-5  
0.418, -1.877e-5  
0.417, -1.850e-5  
0.416, -1.822e-5  
0.415, -1.789e-5  
0.414, -1.753e-5

0.413, -1.719e-5  
0.412, -1.684e-5  
0.411, -1.655e-5  
0.410, -1.624e-5  
0.409, -1.593e-5  
0.408, -1.563e-5  
0.407, -1.530e-5  
0.406, -1.503e-5  
0.405, -1.473e-5  
0.404, -1.441e-5  
0.403, -1.413e-5  
0.402, -1.384e-5  
0.401, -1.360e-5  
0.400, -1.336e-5  
0.399, -1.309e-5  
0.398, -1.282e-5  
0.397, -1.254e-5  
0.396, -1.223e-5  
0.395, -1.199e-5  
0.394, -1.174e-5  
0.393, -1.147e-5  
0.392, -1.121e-5  
0.391, -1.096e-5  
0.390, -1.073e-5  
0.389, -1.048e-5  
0.388, -1.025e-5  
0.387, -1.001e-5  
0.386, -9.781e-6  
0.385, -9.549e-6  
0.384, -9.316e-6  
0.383, -9.077e-6  
0.382, -8.878e-6  
0.381, -8.675e-6  
0.380, -8.434e-6  
0.379, -8.213e-6  
0.378, -8.018e-6  
0.377, -7.828e-6  
0.376, -7.655e-6  
0.375, -7.446e-6  
0.374, -7.259e-6  
0.373, -7.079e-6  
0.372, -6.888e-6  
0.371, -6.690e-6  
0.370, -6.492e-6  
0.369, -6.296e-6  
0.368, -6.109e-6  
0.367, -5.944e-6  
0.366, -5.793e-6  
0.365, -5.626e-6  
0.364, -5.451e-6

0.363, -5.273e-6  
0.362, -5.094e-6  
0.361, -4.944e-6  
0.360, -4.794e-6  
0.359, -4.626e-6  
0.358, -4.440e-6  
0.357, -4.300e-6  
0.356, -4.147e-6  
0.355, -3.989e-6  
0.354, -3.818e-6  
0.353, -3.662e-6  
0.352, -3.537e-6  
0.351, -3.391e-6  
0.350, -3.234e-6  
0.349, -3.103e-6  
0.348, -2.974e-6  
0.347, -2.835e-6  
0.346, -2.700e-6  
0.345, -2.551e-6  
0.344, -2.406e-6  
0.343, -2.274e-6  
0.342, -2.143e-6  
0.341, -2.034e-6  
0.340, -1.909e-6  
0.339, -1.784e-6  
0.338, -1.645e-6  
0.337, -1.531e-6  
0.336, -1.406e-6  
0.335, -1.284e-6  
0.334, -1.174e-6  
0.333, -1.038e-6  
0.332, -9.319e-7  
0.331, -8.425e-7  
0.330, -7.217e-7  
0.329, -5.753e-7  
0.328, -4.486e-7  
0.327, -3.376e-7  
0.326, -2.334e-7  
0.325, -1.381e-7  
0.324, -1.336e-8  
0.323, 7.702e-8  
0.322, 1.802e-7  
0.321, 2.794e-7  
0.320, 3.757e-7  
0.319, 4.985e-7  
0.318, 6.056e-7  
0.317, 7.146e-7  
0.316, 8.089e-7  
0.315, 9.170e-7  
0.314, 1.003e-6

0.313, 1.101e-6  
0.312, 1.198e-6  
0.311, 1.315e-6  
0.310, 1.404e-6  
0.309, 1.492e-6  
0.308, 1.605e-6  
0.307, 1.719e-6  
0.306, 1.802e-6  
0.305, 1.884e-6  
0.304, 1.973e-6  
0.303, 2.078e-6  
0.302, 2.156e-6  
0.301, 2.265e-6  
0.300, 2.338e-6  
0.299, 2.409e-6  
0.298, 2.514e-6  
0.297, 2.603e-6  
0.296, 2.686e-6  
0.295, 2.797e-6  
0.294, 2.887e-6  
0.293, 2.976e-6  
0.292, 3.069e-6  
0.291, 3.164e-6  
0.290, 3.252e-6  
0.289, 3.378e-6  
0.288, 3.468e-6  
0.287, 3.557e-6  
0.286, 3.637e-6  
0.285, 3.716e-6  
0.284, 3.793e-6  
0.283, 3.871e-6  
0.282, 3.952e-6  
0.281, 4.040e-6  
0.280, 4.125e-6  
0.279, 4.209e-6  
0.278, 4.294e-6  
0.277, 4.388e-6  
0.276, 4.475e-6  
0.275, 4.568e-6  
0.274, 4.665e-6  
0.273, 4.751e-6  
0.272, 4.831e-6  
0.271, 4.926e-6  
0.270, 5.013e-6  
0.269, 5.091e-6  
0.268, 5.217e-6  
0.267, 5.324e-6  
0.266, 5.394e-6  
0.265, 5.465e-6  
0.264, 5.545e-6



0.263, 5.669e-6  
0.262, 5.751e-6  
0.261, 5.835e-6  
0.260, 5.915e-6  
0.259, 5.991e-6  
0.258, 6.090e-6  
0.257, 6.222e-6  
0.256, 6.293e-6  
0.255, 6.372e-6  
0.254, 6.436e-6  
0.253, 6.508e-6  
0.252, 6.603e-6  
0.251, 6.690e-6  
0.250, 6.784e-6  
0.249, 6.874e-6  
0.248, 6.971e-6  
0.247, 7.077e-6  
0.246, 7.168e-6  
0.245, 7.240e-6  
0.244, 7.363e-6  
0.243, 7.429e-6  
0.242, 7.527e-6  
0.241, 7.599e-6  
0.240, 7.690e-6  
0.239, 7.778e-6  
0.238, 7.884e-6  
0.237, 7.979e-6  
0.236, 8.098e-6  
0.235, 8.176e-6  
0.234, 8.271e-6  
0.233, 8.377e-6  
0.232, 8.466e-6  
0.231, 8.558e-6  
0.230, 8.680e-6  
0.229, 8.776e-6  
0.228, 8.865e-6  
0.227, 8.951e-6  
0.226, 9.039e-6  
0.225, 9.118e-6  
0.224, 9.213e-6  
0.223, 9.315e-6  
0.222, 9.413e-6  
0.221, 9.530e-6  
0.220, 9.637e-6  
0.219, 9.724e-6  
0.218, 9.814e-6  
0.217, 9.932e-6  
0.216, 1.004e-5  
0.215, 1.013e-5  
0.214, 1.021e-5

0.213, 1.030e-5  
0.212, 1.041e-5  
0.211, 1.053e-5  
0.210, 1.065e-5  
0.209, 1.074e-5  
0.208, 1.082e-5  
0.207, 1.090e-5  
0.206, 1.102e-5  
0.205, 1.116e-5  
0.204, 1.127e-5  
0.203, 1.138e-5  
0.202, 1.148e-5  
0.201, 1.159e-5  
0.200, 1.169e-5  
0.199, 1.179e-5  
0.198, 1.187e-5  
0.197, 1.198e-5  
0.196, 1.209e-5  
0.195, 1.220e-5  
0.194, 1.230e-5  
0.193, 1.240e-5  
0.192, 1.249e-5  
0.191, 1.260e-5  
0.190, 1.271e-5  
0.189, 1.282e-5  
0.188, 1.296e-5  
0.187, 1.305e-5  
0.186, 1.315e-5  
0.185, 1.330e-5  
0.184, 1.342e-5  
0.183, 1.353e-5  
0.182, 1.364e-5  
0.181, 1.375e-5  
0.180, 1.387e-5  
0.179, 1.400e-5  
0.178, 1.412e-5  
0.177, 1.422e-5  
0.176, 1.436e-5  
0.175, 1.449e-5  
0.174, 1.458e-5  
0.173, 1.470e-5  
0.172, 1.481e-5  
0.171, 1.493e-5  
0.170, 1.507e-5  
0.169, 1.520e-5  
0.168, 1.532e-5  
0.167, 1.545e-5  
0.166, 1.559e-5  
0.165, 1.572e-5  
0.164, 1.584e-5

0.163, 1.597e-5  
0.162, 1.611e-5  
0.161, 1.626e-5  
0.160, 1.640e-5  
0.159, 1.655e-5  
0.158, 1.674e-5  
0.157, 1.689e-5  
0.156, 1.703e-5  
0.155, 1.716e-5  
0.154, 1.732e-5  
0.153, 1.746e-5  
0.152, 1.759e-5  
0.151, 1.774e-5  
0.150, 1.788e-5  
0.149, 1.802e-5  
0.148, 1.823e-5  
0.147, 1.839e-5  
0.146, 1.855e-5  
0.145, 1.875e-5  
0.144, 1.889e-5  
0.143, 1.905e-5  
0.142, 1.923e-5  
0.141, 1.941e-5  
0.140, 1.958e-5  
0.139, 1.978e-5  
0.138, 1.997e-5  
0.137, 2.018e-5  
0.136, 2.038e-5  
0.135, 2.060e-5  
0.134, 2.082e-5  
0.133, 2.100e-5  
0.132, 2.118e-5  
0.131, 2.137e-5  
0.130, 2.155e-5  
0.129, 2.173e-5  
0.128, 2.193e-5  
0.127, 2.215e-5  
0.126, 2.235e-5  
0.125, 2.258e-5  
0.124, 2.283e-5  
0.123, 2.304e-5  
0.122, 2.327e-5  
0.121, 2.354e-5  
0.120, 2.381e-5  
0.119, 2.411e-5  
0.118, 2.436e-5  
0.117, 2.459e-5  
0.116, 2.486e-5  
0.115, 2.515e-5  
0.114, 2.543e-5

0.113, 2.572e-5  
0.112, 2.600e-5  
0.111, 2.626e-5  
0.110, 2.657e-5  
0.109, 2.691e-5  
0.108, 2.720e-5  
0.107, 2.751e-5  
0.106, 2.785e-5  
0.105, 2.815e-5  
0.104, 2.845e-5  
0.103, 2.875e-5  
0.102, 2.906e-5  
0.101, 2.939e-5  
0.100, 2.972e-5  
0.099, 3.001e-5  
0.098, 3.036e-5  
0.097, 3.071e-5  
0.096, 3.106e-5  
0.095, 3.143e-5  
0.094, 3.176e-5  
0.093, 3.208e-5  
0.092, 3.243e-5  
0.091, 3.282e-5  
0.090, 3.316e-5  
0.089, 3.353e-5  
0.088, 3.391e-5  
0.087, 3.430e-5  
0.086, 3.471e-5  
0.085, 3.511e-5  
0.084, 3.545e-5  
0.083, 3.583e-5  
0.082, 3.624e-5  
0.081, 3.662e-5  
0.080, 3.698e-5  
0.079, 3.736e-5  
0.078, 3.771e-5  
0.077, 3.807e-5  
0.076, 3.843e-5  
0.075, 3.877e-5  
0.074, 3.914e-5  
0.073, 3.952e-5  
0.072, 3.993e-5  
0.071, 4.036e-5  
0.070, 4.078e-5  
0.069, 4.118e-5  
0.068, 4.155e-5  
0.067, 4.192e-5  
0.066, 4.231e-5  
0.065, 4.268e-5  
0.064, 4.304e-5

0.063, 4.339e-5  
0.062, 4.373e-5  
0.061, 4.411e-5  
0.060, 4.452e-5  
0.059, 4.491e-5  
0.058, 4.530e-5  
0.057, 4.565e-5  
0.056, 4.610e-5  
0.055, 4.658e-5  
0.054, 4.703e-5  
0.053, 4.743e-5  
0.052, 4.777e-5  
0.051, 4.808e-5  
0.050, 4.843e-5  
0.049, 4.880e-5  
0.048, 4.916e-5  
0.047, 4.951e-5  
0.046, 4.987e-5  
0.045, 5.023e-5  
0.044, 5.056e-5  
0.043, 5.088e-5  
0.042, 5.122e-5  
0.041, 5.162e-5  
0.040, 5.200e-5  
0.039, 5.238e-5  
0.038, 5.277e-5  
0.037, 5.313e-5  
0.036, 5.352e-5  
0.035, 5.395e-5  
0.034, 5.434e-5  
0.033, 5.470e-5  
0.032, 5.504e-5  
0.031, 5.531e-5  
0.030, 5.552e-5  
0.029, 5.587e-5  
0.028, 5.621e-5  
0.027, 5.648e-5  
0.026, 5.676e-5  
0.025, 5.708e-5  
0.024, 5.744e-5  
0.023, 5.791e-5  
0.022, 5.837e-5  
0.021, 5.878e-5  
0.020, 5.912e-5  
0.019, 5.939e-5  
0.018, 5.960e-5  
0.017, 5.988e-5  
0.016, 6.023e-5  
0.015, 6.057e-5  
0.014, 6.089e-5

0.013, 6.123e-5  
0.012, 6.155e-5  
0.011, 6.187e-5  
0.010, 6.222e-5  
0.009, 6.249e-5  
0.008, 6.273e-5  
0.007, 6.307e-5  
0.006, 6.351e-5  
0.005, 6.398e-5  
0.004, 6.430e-5  
0.003, 6.450e-5  
0.002, 6.478e-5  
0.001, 6.512e-5  
0.000, 6.541e-5  
-0.001, 6.563e-5  
-0.002, 6.583e-5  
-0.003, 6.606e-5  
-0.004, 6.639e-5  
-0.005, 6.676e-5  
-0.006, 6.725e-5  
-0.007, 6.772e-5  
-0.008, 6.812e-5  
-0.009, 6.851e-5  
-0.010, 6.881e-5  
-0.011, 6.902e-5  
-0.012, 6.920e-5  
-0.013, 6.946e-5  
-0.014, 6.972e-5  
-0.015, 6.994e-5  
-0.016, 7.020e-5  
-0.017, 7.045e-5  
-0.018, 7.077e-5  
-0.019, 7.116e-5  
-0.020, 7.152e-5  
-0.021, 7.187e-5  
-0.022, 7.217e-5  
-0.023, 7.244e-5  
-0.024, 7.278e-5  
-0.025, 7.322e-5  
-0.026, 7.364e-5  
-0.027, 7.399e-5  
-0.028, 7.433e-5  
-0.029, 7.458e-5  
-0.030, 7.489e-5  
-0.031, 7.527e-5  
-0.032, 7.568e-5  
-0.033, 7.610e-5  
-0.034, 7.647e-5  
-0.035, 7.680e-5  
-0.036, 7.704e-5

-0.037, 7.728e-5  
-0.038, 7.757e-5  
-0.039, 7.793e-5  
-0.040, 7.836e-5  
-0.041, 7.876e-5  
-0.042, 7.906e-5  
-0.043, 7.929e-5  
-0.044, 7.954e-5  
-0.045, 7.989e-5  
-0.046, 8.030e-5  
-0.047, 8.065e-5  
-0.048, 8.102e-5  
-0.049, 8.144e-5  
-0.050, 8.185e-5  
-0.051, 8.224e-5  
-0.052, 8.269e-5  
-0.053, 8.309e-5  
-0.054, 8.342e-5  
-0.055, 8.372e-5  
-0.056, 8.404e-5  
-0.057, 8.457e-5  
-0.058, 8.510e-5  
-0.059, 8.549e-5  
-0.060, 8.586e-5  
-0.061, 8.619e-5  
-0.062, 8.648e-5  
-0.063, 8.672e-5  
-0.064, 8.700e-5  
-0.065, 8.725e-5  
-0.066, 8.752e-5  
-0.067, 8.782e-5  
-0.068, 8.819e-5  
-0.069, 8.861e-5  
-0.070, 8.897e-5  
-0.071, 8.930e-5  
-0.072, 8.960e-5  
-0.073, 8.998e-5  
-0.074, 9.036e-5  
-0.075, 9.073e-5  
-0.076, 9.126e-5  
-0.077, 9.179e-5  
-0.078, 9.215e-5  
-0.079, 9.244e-5  
-0.080, 9.275e-5  
-0.081, 9.318e-5  
-0.082, 9.371e-5  
-0.083, 9.419e-5  
-0.084, 9.455e-5  
-0.085, 9.486e-5  
-0.086, 9.520e-5

-0.087, 9.560e-5  
-0.088, 9.600e-5  
-0.089, 9.641e-5  
-0.090, 9.674e-5  
-0.091, 9.710e-5  
-0.092, 9.745e-5  
-0.093, 9.784e-5  
-0.094, 9.830e-5  
-0.095, 9.873e-5  
-0.096, 9.915e-5  
-0.097, 9.963e-5  
-0.098, 1.001e-4  
-0.099, 1.005e-4  
-0.100, 1.008e-4  
-0.101, 1.012e-4  
-0.102, 1.015e-4  
-0.103, 1.019e-4  
-0.104, 1.022e-4  
-0.105, 1.028e-4  
-0.106, 1.034e-4  
-0.107, 1.041e-4  
-0.108, 1.044e-4  
-0.109, 1.046e-4  
-0.110, 1.048e-4  
-0.111, 1.051e-4  
-0.112, 1.054e-4  
-0.113, 1.058e-4  
-0.114, 1.064e-4  
-0.115, 1.072e-4  
-0.116, 1.078e-4  
-0.117, 1.081e-4  
-0.118, 1.085e-4  
-0.119, 1.091e-4  
-0.120, 1.097e-4  
-0.121, 1.103e-4  
-0.122, 1.108e-4  
-0.123, 1.112e-4  
-0.124, 1.116e-4  
-0.125, 1.117e-4  
-0.126, 1.118e-4  
-0.127, 1.121e-4  
-0.128, 1.127e-4  
-0.129, 1.135e-4  
-0.130, 1.141e-4  
-0.131, 1.144e-4  
-0.132, 1.147e-4  
-0.133, 1.151e-4  
-0.134, 1.154e-4  
-0.135, 1.159e-4  
-0.136, 1.165e-4



-0.137, 1.170e-4  
-0.138, 1.173e-4  
-0.139, 1.178e-4  
-0.140, 1.182e-4  
-0.141, 1.185e-4  
-0.142, 1.188e-4  
-0.143, 1.191e-4  
-0.144, 1.194e-4  
-0.145, 1.198e-4  
-0.146, 1.202e-4  
-0.147, 1.207e-4  
-0.148, 1.211e-4  
-0.149, 1.215e-4  
-0.150, 1.218e-4  
-0.151, 1.220e-4  
-0.152, 1.224e-4  
-0.153, 1.232e-4  
-0.154, 1.241e-4  
-0.155, 1.247e-4  
-0.156, 1.251e-4  
-0.157, 1.255e-4  
-0.158, 1.259e-4  
-0.159, 1.264e-4  
-0.160, 1.268e-4  
-0.161, 1.272e-4  
-0.162, 1.275e-4  
-0.163, 1.281e-4  
-0.164, 1.287e-4  
-0.165, 1.290e-4  
-0.166, 1.295e-4  
-0.167, 1.301e-4  
-0.168, 1.305e-4  
-0.169, 1.310e-4  
-0.170, 1.314e-4  
-0.171, 1.319e-4  
-0.172, 1.324e-4  
-0.173, 1.327e-4  
-0.174, 1.331e-4  
-0.175, 1.336e-4  
-0.176, 1.341e-4  
-0.177, 1.346e-4  
-0.178, 1.352e-4  
-0.179, 1.356e-4  
-0.180, 1.360e-4  
-0.181, 1.365e-4  
-0.182, 1.371e-4  
-0.183, 1.376e-4  
-0.184, 1.381e-4  
-0.185, 1.385e-4  
-0.186, 1.388e-4

-0.187, 1.392e-4  
-0.188, 1.398e-4  
-0.189, 1.405e-4  
-0.190, 1.410e-4  
-0.191, 1.413e-4  
-0.192, 1.415e-4  
-0.193, 1.417e-4  
-0.194, 1.422e-4  
-0.195, 1.428e-4  
-0.196, 1.436e-4  
-0.197, 1.443e-4  
-0.198, 1.448e-4  
-0.199, 1.451e-4  
-0.200, 1.453e-4  
-0.201, 1.458e-4  
-0.202, 1.464e-4  
-0.203, 1.469e-4  
-0.204, 1.473e-4  
-0.205, 1.479e-4  
-0.206, 1.483e-4  
-0.207, 1.487e-4  
-0.208, 1.492e-4  
-0.209, 1.497e-4  
-0.210, 1.505e-4  
-0.211, 1.514e-4  
-0.212, 1.520e-4  
-0.213, 1.525e-4  
-0.214, 1.530e-4  
-0.215, 1.534e-4  
-0.216, 1.537e-4  
-0.217, 1.540e-4  
-0.218, 1.543e-4  
-0.219, 1.548e-4  
-0.220, 1.555e-4  
-0.221, 1.561e-4  
-0.222, 1.568e-4  
-0.223, 1.575e-4  
-0.224, 1.581e-4  
-0.225, 1.584e-4  
-0.226, 1.586e-4  
-0.227, 1.588e-4  
-0.228, 1.590e-4  
-0.229, 1.591e-4  
-0.230, 1.596e-4  
-0.231, 1.606e-4  
-0.232, 1.616e-4  
-0.233, 1.623e-4  
-0.234, 1.630e-4  
-0.235, 1.636e-4  
-0.236, 1.638e-4

-0.237, 1.642e-4  
-0.238, 1.648e-4  
-0.239, 1.653e-4  
-0.240, 1.658e-4  
-0.241, 1.664e-4  
-0.242, 1.669e-4  
-0.243, 1.674e-4  
-0.244, 1.679e-4  
-0.245, 1.682e-4  
-0.246, 1.688e-4  
-0.247, 1.695e-4  
-0.248, 1.701e-4  
-0.249, 1.707e-4  
-0.250, 1.713e-4  
-0.251, 1.720e-4  
-0.252, 1.728e-4  
-0.253, 1.732e-4  
-0.254, 1.732e-4  
-0.255, 1.734e-4  
-0.256, 1.740e-4  
-0.257, 1.746e-4  
-0.258, 1.752e-4  
-0.259, 1.757e-4  
-0.260, 1.763e-4  
-0.261, 1.769e-4  
-0.262, 1.774e-4  
-0.263, 1.780e-4  
-0.264, 1.790e-4  
-0.265, 1.799e-4  
-0.266, 1.805e-4  
-0.267, 1.807e-4  
-0.268, 1.811e-4  
-0.269, 1.817e-4  
-0.270, 1.824e-4  
-0.271, 1.827e-4  
-0.272, 1.830e-4  
-0.273, 1.834e-4  
-0.274, 1.842e-4  
-0.275, 1.849e-4  
-0.276, 1.855e-4  
-0.277, 1.863e-4  
-0.278, 1.870e-4  
-0.279, 1.878e-4  
-0.280, 1.885e-4  
-0.281, 1.889e-4  
-0.282, 1.895e-4  
-0.283, 1.901e-4  
-0.284, 1.904e-4  
-0.285, 1.905e-4  
-0.286, 1.911e-4

-0.287, 1.917e-4  
-0.288, 1.925e-4  
-0.289, 1.934e-4  
-0.290, 1.939e-4  
-0.291, 1.943e-4  
-0.292, 1.949e-4  
-0.293, 1.954e-4  
-0.294, 1.960e-4  
-0.295, 1.965e-4  
-0.296, 1.970e-4  
-0.297, 1.974e-4  
-0.298, 1.978e-4  
-0.299, 1.978e-4  
-0.300, 1.982e-4  
-0.301, 1.987e-4  
-0.302, 1.993e-4  
-0.303, 2.000e-4  
-0.304, 2.008e-4  
-0.305, 2.015e-4  
-0.306, 2.015e-4  
-0.307, 2.016e-4  
-0.308, 2.021e-4  
-0.309, 2.028e-4  
-0.310, 2.036e-4  
-0.311, 2.042e-4  
-0.312, 2.046e-4  
-0.313, 2.048e-4  
-0.314, 2.049e-4  
-0.315, 2.054e-4  
-0.316, 2.057e-4  
-0.317, 2.058e-4  
-0.318, 2.060e-4  
-0.319, 2.067e-4  
-0.320, 2.071e-4  
-0.321, 2.074e-4  
-0.322, 2.077e-4  
-0.323, 2.079e-4  
-0.324, 2.085e-4  
-0.325, 2.092e-4  
-0.326, 2.098e-4  
-0.327, 2.104e-4  
-0.328, 2.111e-4  
-0.329, 2.116e-4  
-0.330, 2.120e-4  
-0.331, 2.125e-4  
-0.332, 2.129e-4  
-0.333, 2.133e-4  
-0.334, 2.139e-4  
-0.335, 2.145e-4  
-0.336, 2.149e-4

-0.337, 2.155e-4  
-0.338, 2.161e-4  
-0.339, 2.164e-4  
-0.340, 2.162e-4  
-0.341, 2.161e-4  
-0.342, 2.169e-4  
-0.343, 2.176e-4  
-0.344, 2.177e-4  
-0.345, 2.177e-4  
-0.346, 2.182e-4  
-0.347, 2.186e-4  
-0.348, 2.188e-4  
-0.349, 2.193e-4  
-0.350, 2.201e-4  
-0.351, 2.207e-4  
-0.352, 2.208e-4  
-0.353, 2.209e-4  
-0.354, 2.214e-4  
-0.355, 2.219e-4  
-0.356, 2.225e-4  
-0.357, 2.228e-4  
-0.358, 2.230e-4  
-0.359, 2.229e-4  
-0.360, 2.231e-4  
-0.361, 2.236e-4  
-0.362, 2.245e-4  
-0.363, 2.251e-4  
-0.364, 2.254e-4  
-0.365, 2.256e-4  
-0.366, 2.261e-4  
-0.367, 2.264e-4  
-0.368, 2.265e-4  
-0.369, 2.268e-4  
-0.370, 2.271e-4  
-0.371, 2.273e-4  
-0.372, 2.275e-4  
-0.373, 2.276e-4  
-0.374, 2.278e-4  
-0.375, 2.280e-4  
-0.376, 2.283e-4  
-0.377, 2.285e-4  
-0.378, 2.288e-4  
-0.379, 2.294e-4  
-0.380, 2.299e-4  
-0.381, 2.300e-4  
-0.382, 2.300e-4  
-0.383, 2.303e-4  
-0.384, 2.306e-4  
-0.385, 2.311e-4  
-0.386, 2.313e-4

-0.387, 2.317e-4  
-0.388, 2.324e-4  
-0.389, 2.325e-4  
-0.390, 2.324e-4  
-0.391, 2.325e-4  
-0.392, 2.327e-4  
-0.393, 2.327e-4  
-0.394, 2.334e-4  
-0.395, 2.345e-4  
-0.396, 2.351e-4  
-0.397, 2.351e-4  
-0.398, 2.349e-4  
-0.399, 2.351e-4

Mar. 30, 2021 04:18:09

Linear Sweep Voltammetry

File: c:\users\shadji04\desktop\sofia cv\30032021\complex 6 sweep experiment under  
o2\1500 rpm\_25 mv rate

o2\_n2\_o2.txt

Data Source: Experiment

Instrument Model: CHI650E

Header:

Note: 1500 rpm

Init E (V) = 0.8

Final E (V) = -0.4

Scan Rate (V/s) = 0.025

Sample Interval (V) = 0.001

Quiet Time (sec) = 2

Sensitivity (A/V) = 0.001

Potential/V, Current/A

0.800, -1.520e-4  
0.799, -1.516e-4  
0.798, -1.511e-4  
0.797, -1.507e-4  
0.796, -1.503e-4  
0.795, -1.501e-4  
0.794, -1.499e-4  
0.793, -1.495e-4  
0.792, -1.491e-4  
0.791, -1.486e-4  
0.790, -1.484e-4  
0.789, -1.482e-4  
0.788, -1.478e-4  
0.787, -1.475e-4  
0.786, -1.471e-4  
0.785, -1.468e-4  
0.784, -1.464e-4  
0.783, -1.462e-4  
0.782, -1.463e-4  
0.781, -1.459e-4  
0.780, -1.453e-4

0.779, -1.450e-4  
0.778, -1.447e-4  
0.777, -1.444e-4  
0.776, -1.442e-4  
0.775, -1.439e-4  
0.774, -1.435e-4  
0.773, -1.432e-4  
0.772, -1.429e-4  
0.771, -1.427e-4  
0.770, -1.426e-4  
0.769, -1.424e-4  
0.768, -1.421e-4  
0.767, -1.418e-4  
0.766, -1.415e-4  
0.765, -1.413e-4  
0.764, -1.409e-4  
0.763, -1.406e-4  
0.762, -1.404e-4  
0.761, -1.400e-4  
0.760, -1.396e-4  
0.759, -1.392e-4  
0.758, -1.393e-4  
0.757, -1.391e-4  
0.756, -1.388e-4  
0.755, -1.387e-4  
0.754, -1.384e-4  
0.753, -1.380e-4  
0.752, -1.378e-4  
0.751, -1.375e-4  
0.750, -1.372e-4  
0.749, -1.370e-4  
0.748, -1.368e-4  
0.747, -1.364e-4  
0.746, -1.361e-4  
0.745, -1.357e-4  
0.744, -1.354e-4  
0.743, -1.351e-4  
0.742, -1.349e-4  
0.741, -1.346e-4  
0.740, -1.344e-4  
0.739, -1.343e-4  
0.738, -1.339e-4  
0.737, -1.336e-4  
0.736, -1.334e-4  
0.735, -1.331e-4  
0.734, -1.330e-4  
0.733, -1.330e-4  
0.732, -1.328e-4  
0.731, -1.324e-4  
0.730, -1.320e-4

0.729, -1.317e-4  
0.728, -1.314e-4  
0.727, -1.311e-4  
0.726, -1.306e-4  
0.725, -1.303e-4  
0.724, -1.301e-4  
0.723, -1.298e-4  
0.722, -1.297e-4  
0.721, -1.294e-4  
0.720, -1.292e-4  
0.719, -1.292e-4  
0.718, -1.291e-4  
0.717, -1.289e-4  
0.716, -1.283e-4  
0.715, -1.279e-4  
0.714, -1.274e-4  
0.713, -1.270e-4  
0.712, -1.268e-4  
0.711, -1.265e-4  
0.710, -1.263e-4  
0.709, -1.261e-4  
0.708, -1.257e-4  
0.707, -1.254e-4  
0.706, -1.254e-4  
0.705, -1.252e-4  
0.704, -1.251e-4  
0.703, -1.246e-4  
0.702, -1.241e-4  
0.701, -1.239e-4  
0.700, -1.237e-4  
0.699, -1.237e-4  
0.698, -1.235e-4  
0.697, -1.234e-4  
0.696, -1.231e-4  
0.695, -1.227e-4  
0.694, -1.224e-4  
0.693, -1.220e-4  
0.692, -1.217e-4  
0.691, -1.215e-4  
0.690, -1.212e-4  
0.689, -1.210e-4  
0.688, -1.207e-4  
0.687, -1.205e-4  
0.686, -1.203e-4  
0.685, -1.200e-4  
0.684, -1.198e-4  
0.683, -1.196e-4  
0.682, -1.194e-4  
0.681, -1.191e-4  
0.680, -1.188e-4



0.679, -1.185e-4  
0.678, -1.182e-4  
0.677, -1.181e-4  
0.676, -1.179e-4  
0.675, -1.175e-4  
0.674, -1.170e-4  
0.673, -1.167e-4  
0.672, -1.165e-4  
0.671, -1.164e-4  
0.670, -1.162e-4  
0.669, -1.161e-4  
0.668, -1.159e-4  
0.667, -1.158e-4  
0.666, -1.155e-4  
0.665, -1.151e-4  
0.664, -1.147e-4  
0.663, -1.143e-4  
0.662, -1.140e-4  
0.661, -1.137e-4  
0.660, -1.135e-4  
0.659, -1.133e-4  
0.658, -1.132e-4  
0.657, -1.130e-4  
0.656, -1.128e-4  
0.655, -1.127e-4  
0.654, -1.124e-4  
0.653, -1.121e-4  
0.652, -1.118e-4  
0.651, -1.114e-4  
0.650, -1.112e-4  
0.649, -1.110e-4  
0.648, -1.107e-4  
0.647, -1.104e-4  
0.646, -1.100e-4  
0.645, -1.097e-4  
0.644, -1.096e-4  
0.643, -1.095e-4  
0.642, -1.092e-4  
0.641, -1.089e-4  
0.640, -1.087e-4  
0.639, -1.084e-4  
0.638, -1.081e-4  
0.637, -1.080e-4  
0.636, -1.079e-4  
0.635, -1.076e-4  
0.634, -1.074e-4  
0.633, -1.071e-4  
0.632, -1.068e-4  
0.631, -1.065e-4  
0.630, -1.062e-4

0.629, -1.061e-4  
0.628, -1.059e-4  
0.627, -1.057e-4  
0.626, -1.055e-4  
0.625, -1.053e-4  
0.624, -1.051e-4  
0.623, -1.051e-4  
0.622, -1.048e-4  
0.621, -1.046e-4  
0.620, -1.044e-4  
0.619, -1.041e-4  
0.618, -1.037e-4  
0.617, -1.034e-4  
0.616, -1.031e-4  
0.615, -1.030e-4  
0.614, -1.029e-4  
0.613, -1.026e-4  
0.612, -1.022e-4  
0.611, -1.020e-4  
0.610, -1.018e-4  
0.609, -1.016e-4  
0.608, -1.014e-4  
0.607, -1.012e-4  
0.606, -1.009e-4  
0.605, -1.009e-4  
0.604, -1.008e-4  
0.603, -1.006e-4  
0.602, -1.003e-4  
0.601, -1.002e-4  
0.600, -9.999e-5  
0.599, -9.971e-5  
0.598, -9.949e-5  
0.597, -9.926e-5  
0.596, -9.914e-5  
0.595, -9.883e-5  
0.594, -9.855e-5  
0.593, -9.839e-5  
0.592, -9.831e-5  
0.591, -9.815e-5  
0.590, -9.797e-5  
0.589, -9.774e-5  
0.588, -9.768e-5  
0.587, -9.765e-5  
0.586, -9.749e-5  
0.585, -9.724e-5  
0.584, -9.698e-5  
0.583, -9.676e-5  
0.582, -9.660e-5  
0.581, -9.640e-5  
0.580, -9.612e-5

0.579, -9.580e-5  
0.578, -9.546e-5  
0.577, -9.519e-5  
0.576, -9.497e-5  
0.575, -9.474e-5  
0.574, -9.458e-5  
0.573, -9.438e-5  
0.572, -9.427e-5  
0.571, -9.408e-5  
0.570, -9.375e-5  
0.569, -9.352e-5  
0.568, -9.327e-5  
0.567, -9.305e-5  
0.566, -9.287e-5  
0.565, -9.279e-5  
0.564, -9.252e-5  
0.563, -9.231e-5  
0.562, -9.217e-5  
0.561, -9.193e-5  
0.560, -9.163e-5  
0.559, -9.141e-5  
0.558, -9.121e-5  
0.557, -9.097e-5  
0.556, -9.069e-5  
0.555, -9.045e-5  
0.554, -9.004e-5  
0.553, -8.967e-5  
0.552, -8.946e-5  
0.551, -8.946e-5  
0.550, -8.919e-5  
0.549, -8.878e-5  
0.548, -8.835e-5  
0.547, -8.814e-5  
0.546, -8.798e-5  
0.545, -8.777e-5  
0.544, -8.744e-5  
0.543, -8.705e-5  
0.542, -8.676e-5  
0.541, -8.649e-5  
0.540, -8.623e-5  
0.539, -8.591e-5  
0.538, -8.559e-5  
0.537, -8.525e-5  
0.536, -8.494e-5  
0.535, -8.467e-5  
0.534, -8.438e-5  
0.533, -8.412e-5  
0.532, -8.386e-5  
0.531, -8.354e-5  
0.530, -8.325e-5

0.529, -8.292e-5  
0.528, -8.257e-5  
0.527, -8.228e-5  
0.526, -8.193e-5  
0.525, -8.154e-5  
0.524, -8.112e-5  
0.523, -8.083e-5  
0.522, -8.038e-5  
0.521, -7.988e-5  
0.520, -7.944e-5  
0.519, -7.901e-5  
0.518, -7.859e-5  
0.517, -7.831e-5  
0.516, -7.799e-5  
0.515, -7.755e-5  
0.514, -7.713e-5  
0.513, -7.672e-5  
0.512, -7.631e-5  
0.511, -7.596e-5  
0.510, -7.550e-5  
0.509, -7.504e-5  
0.508, -7.459e-5  
0.507, -7.418e-5  
0.506, -7.371e-5  
0.505, -7.317e-5  
0.504, -7.262e-5  
0.503, -7.211e-5  
0.502, -7.159e-5  
0.501, -7.111e-5  
0.500, -7.057e-5  
0.499, -7.014e-5  
0.498, -6.962e-5  
0.497, -6.902e-5  
0.496, -6.849e-5  
0.495, -6.806e-5  
0.494, -6.764e-5  
0.493, -6.714e-5  
0.492, -6.651e-5  
0.491, -6.586e-5  
0.490, -6.535e-5  
0.489, -6.481e-5  
0.488, -6.424e-5  
0.487, -6.361e-5  
0.486, -6.303e-5  
0.485, -6.252e-5  
0.484, -6.198e-5  
0.483, -6.146e-5  
0.482, -6.090e-5  
0.481, -6.015e-5  
0.480, -5.944e-5

0.479, -5.884e-5  
0.478, -5.827e-5  
0.477, -5.762e-5  
0.476, -5.697e-5  
0.475, -5.645e-5  
0.474, -5.588e-5  
0.473, -5.530e-5  
0.472, -5.474e-5  
0.471, -5.404e-5  
0.470, -5.332e-5  
0.469, -5.269e-5  
0.468, -5.198e-5  
0.467, -5.139e-5  
0.466, -5.080e-5  
0.465, -5.019e-5  
0.464, -4.958e-5  
0.463, -4.893e-5  
0.462, -4.831e-5  
0.461, -4.767e-5  
0.460, -4.707e-5  
0.459, -4.647e-5  
0.458, -4.585e-5  
0.457, -4.520e-5  
0.456, -4.462e-5  
0.455, -4.400e-5  
0.454, -4.337e-5  
0.453, -4.272e-5  
0.452, -4.214e-5  
0.451, -4.157e-5  
0.450, -4.087e-5  
0.449, -4.016e-5  
0.448, -3.954e-5  
0.447, -3.902e-5  
0.446, -3.852e-5  
0.445, -3.803e-5  
0.444, -3.749e-5  
0.443, -3.693e-5  
0.442, -3.636e-5  
0.441, -3.570e-5  
0.440, -3.514e-5  
0.439, -3.468e-5  
0.438, -3.438e-5  
0.437, -3.383e-5  
0.436, -3.316e-5  
0.435, -3.258e-5  
0.434, -3.207e-5  
0.433, -3.159e-5  
0.432, -3.110e-5  
0.431, -3.048e-5  
0.430, -2.990e-5

0.429, -2.940e-5  
0.428, -2.889e-5  
0.427, -2.844e-5  
0.426, -2.803e-5  
0.425, -2.755e-5  
0.424, -2.706e-5  
0.423, -2.659e-5  
0.422, -2.613e-5  
0.421, -2.567e-5  
0.420, -2.521e-5  
0.419, -2.480e-5  
0.418, -2.432e-5  
0.417, -2.385e-5  
0.416, -2.346e-5  
0.415, -2.312e-5  
0.414, -2.276e-5  
0.413, -2.237e-5  
0.412, -2.194e-5  
0.411, -2.149e-5  
0.410, -2.105e-5  
0.409, -2.066e-5  
0.408, -2.030e-5  
0.407, -1.991e-5  
0.406, -1.953e-5  
0.405, -1.913e-5  
0.404, -1.877e-5  
0.403, -1.846e-5  
0.402, -1.812e-5  
0.401, -1.773e-5  
0.400, -1.736e-5  
0.399, -1.701e-5  
0.398, -1.671e-5  
0.397, -1.646e-5  
0.396, -1.607e-5  
0.395, -1.565e-5  
0.394, -1.532e-5  
0.393, -1.501e-5  
0.392, -1.473e-5  
0.391, -1.442e-5  
0.390, -1.409e-5  
0.389, -1.382e-5  
0.388, -1.353e-5  
0.387, -1.322e-5  
0.386, -1.294e-5  
0.385, -1.265e-5  
0.384, -1.235e-5  
0.383, -1.202e-5  
0.382, -1.175e-5  
0.381, -1.147e-5  
0.380, -1.121e-5

0.379, -1.094e-5  
0.378, -1.067e-5  
0.377, -1.042e-5  
0.376, -1.018e-5  
0.375, -9.910e-6  
0.374, -9.669e-6  
0.373, -9.416e-6  
0.372, -9.178e-6  
0.371, -8.926e-6  
0.370, -8.686e-6  
0.369, -8.448e-6  
0.368, -8.230e-6  
0.367, -8.001e-6  
0.366, -7.783e-6  
0.365, -7.560e-6  
0.364, -7.311e-6  
0.363, -7.063e-6  
0.362, -6.864e-6  
0.361, -6.657e-6  
0.360, -6.474e-6  
0.359, -6.264e-6  
0.358, -6.043e-6  
0.357, -5.847e-6  
0.356, -5.651e-6  
0.355, -5.451e-6  
0.354, -5.228e-6  
0.353, -5.036e-6  
0.352, -4.856e-6  
0.351, -4.684e-6  
0.350, -4.466e-6  
0.349, -4.272e-6  
0.348, -4.081e-6  
0.347, -3.906e-6  
0.346, -3.732e-6  
0.345, -3.562e-6  
0.344, -3.417e-6  
0.343, -3.244e-6  
0.342, -3.091e-6  
0.341, -2.937e-6  
0.340, -2.749e-6  
0.339, -2.585e-6  
0.338, -2.433e-6  
0.337, -2.267e-6  
0.336, -2.097e-6  
0.335, -1.951e-6  
0.334, -1.807e-6  
0.333, -1.625e-6  
0.332, -1.477e-6  
0.331, -1.334e-6  
0.330, -1.165e-6

0.329, -1.031e-6  
0.328, -8.690e-7  
0.327, -7.364e-7  
0.326, -6.205e-7  
0.325, -4.898e-7  
0.324, -3.376e-7  
0.323, -1.804e-7  
0.322, -5.069e-8  
0.321, 6.720e-8  
0.320, 2.146e-7  
0.319, 3.609e-7  
0.318, 4.798e-7  
0.317, 6.164e-7  
0.316, 7.303e-7  
0.315, 8.531e-7  
0.314, 9.916e-7  
0.313, 1.105e-6  
0.312, 1.231e-6  
0.311, 1.364e-6  
0.310, 1.514e-6  
0.309, 1.608e-6  
0.308, 1.731e-6  
0.307, 1.844e-6  
0.306, 1.963e-6  
0.305, 2.094e-6  
0.304, 2.212e-6  
0.303, 2.332e-6  
0.302, 2.479e-6  
0.301, 2.598e-6  
0.300, 2.702e-6  
0.299, 2.821e-6  
0.298, 2.928e-6  
0.297, 3.028e-6  
0.296, 3.136e-6  
0.295, 3.249e-6  
0.294, 3.372e-6  
0.293, 3.476e-6  
0.292, 3.581e-6  
0.291, 3.721e-6  
0.290, 3.834e-6  
0.289, 3.937e-6  
0.288, 4.040e-6  
0.287, 4.146e-6  
0.286, 4.255e-6  
0.285, 4.355e-6  
0.284, 4.475e-6  
0.283, 4.584e-6  
0.282, 4.690e-6  
0.281, 4.809e-6  
0.280, 4.912e-6



0.279, 5.029e-6  
0.278, 5.136e-6  
0.277, 5.232e-6  
0.276, 5.342e-6  
0.275, 5.434e-6  
0.274, 5.543e-6  
0.273, 5.661e-6  
0.272, 5.763e-6  
0.271, 5.861e-6  
0.270, 5.983e-6  
0.269, 6.092e-6  
0.268, 6.186e-6  
0.267, 6.284e-6  
0.266, 6.391e-6  
0.265, 6.512e-6  
0.264, 6.618e-6  
0.263, 6.696e-6  
0.262, 6.815e-6  
0.261, 6.926e-6  
0.260, 7.053e-6  
0.259, 7.141e-6  
0.258, 7.223e-6  
0.257, 7.341e-6  
0.256, 7.469e-6  
0.255, 7.567e-6  
0.254, 7.647e-6  
0.253, 7.755e-6  
0.252, 7.854e-6  
0.251, 7.971e-6  
0.250, 8.106e-6  
0.249, 8.220e-6  
0.248, 8.322e-6  
0.247, 8.439e-6  
0.246, 8.528e-6  
0.245, 8.636e-6  
0.244, 8.771e-6  
0.243, 8.875e-6  
0.242, 8.965e-6  
0.241, 9.077e-6  
0.240, 9.193e-6  
0.239, 9.311e-6  
0.238, 9.465e-6  
0.237, 9.582e-6  
0.236, 9.683e-6  
0.235, 9.763e-6  
0.234, 9.870e-6  
0.233, 9.974e-6  
0.232, 1.011e-5  
0.231, 1.022e-5  
0.230, 1.030e-5

0.229, 1.041e-5  
0.228, 1.055e-5  
0.227, 1.064e-5  
0.226, 1.077e-5  
0.225, 1.090e-5  
0.224, 1.102e-5  
0.223, 1.113e-5  
0.222, 1.124e-5  
0.221, 1.135e-5  
0.220, 1.150e-5  
0.219, 1.160e-5  
0.218, 1.171e-5  
0.217, 1.182e-5  
0.216, 1.193e-5  
0.215, 1.206e-5  
0.214, 1.220e-5  
0.213, 1.232e-5  
0.212, 1.241e-5  
0.211, 1.248e-5  
0.210, 1.263e-5  
0.209, 1.279e-5  
0.208, 1.295e-5  
0.207, 1.308e-5  
0.206, 1.318e-5  
0.205, 1.332e-5  
0.204, 1.347e-5  
0.203, 1.355e-5  
0.202, 1.367e-5  
0.201, 1.380e-5  
0.200, 1.391e-5  
0.199, 1.404e-5  
0.198, 1.415e-5  
0.197, 1.427e-5  
0.196, 1.441e-5  
0.195, 1.455e-5  
0.194, 1.469e-5  
0.193, 1.486e-5  
0.192, 1.497e-5  
0.191, 1.509e-5  
0.190, 1.521e-5  
0.189, 1.534e-5  
0.188, 1.548e-5  
0.187, 1.564e-5  
0.186, 1.580e-5  
0.185, 1.593e-5  
0.184, 1.608e-5  
0.183, 1.623e-5  
0.182, 1.633e-5  
0.181, 1.646e-5  
0.180, 1.661e-5

0.179, 1.677e-5  
0.178, 1.692e-5  
0.177, 1.706e-5  
0.176, 1.721e-5  
0.175, 1.742e-5  
0.174, 1.761e-5  
0.173, 1.775e-5  
0.172, 1.788e-5  
0.171, 1.802e-5  
0.170, 1.821e-5  
0.169, 1.837e-5  
0.168, 1.853e-5  
0.167, 1.870e-5  
0.166, 1.885e-5  
0.165, 1.900e-5  
0.164, 1.922e-5  
0.163, 1.941e-5  
0.162, 1.958e-5  
0.161, 1.977e-5  
0.160, 1.995e-5  
0.159, 2.012e-5  
0.158, 2.025e-5  
0.157, 2.041e-5  
0.156, 2.066e-5  
0.155, 2.090e-5  
0.154, 2.110e-5  
0.153, 2.128e-5  
0.152, 2.148e-5  
0.151, 2.168e-5  
0.150, 2.190e-5  
0.149, 2.213e-5  
0.148, 2.231e-5  
0.147, 2.250e-5  
0.146, 2.272e-5  
0.145, 2.297e-5  
0.144, 2.324e-5  
0.143, 2.348e-5  
0.142, 2.373e-5  
0.141, 2.402e-5  
0.140, 2.434e-5  
0.139, 2.464e-5  
0.138, 2.491e-5  
0.137, 2.514e-5  
0.136, 2.539e-5  
0.135, 2.567e-5  
0.134, 2.594e-5  
0.133, 2.622e-5  
0.132, 2.654e-5  
0.131, 2.681e-5  
0.130, 2.712e-5

0.129, 2.748e-5  
0.128, 2.786e-5  
0.127, 2.819e-5  
0.126, 2.843e-5  
0.125, 2.873e-5  
0.124, 2.908e-5  
0.123, 2.945e-5  
0.122, 2.985e-5  
0.121, 3.023e-5  
0.120, 3.057e-5  
0.119, 3.089e-5  
0.118, 3.122e-5  
0.117, 3.159e-5  
0.116, 3.202e-5  
0.115, 3.246e-5  
0.114, 3.287e-5  
0.113, 3.326e-5  
0.112, 3.367e-5  
0.111, 3.411e-5  
0.110, 3.453e-5  
0.109, 3.493e-5  
0.108, 3.538e-5  
0.107, 3.585e-5  
0.106, 3.627e-5  
0.105, 3.672e-5  
0.104, 3.724e-5  
0.103, 3.773e-5  
0.102, 3.817e-5  
0.101, 3.864e-5  
0.100, 3.911e-5  
0.099, 3.957e-5  
0.098, 4.008e-5  
0.097, 4.057e-5  
0.096, 4.105e-5  
0.095, 4.155e-5  
0.094, 4.204e-5  
0.093, 4.254e-5  
0.092, 4.308e-5  
0.091, 4.361e-5  
0.090, 4.409e-5  
0.089, 4.459e-5  
0.088, 4.511e-5  
0.087, 4.559e-5  
0.086, 4.611e-5  
0.085, 4.664e-5  
0.084, 4.718e-5  
0.083, 4.770e-5  
0.082, 4.821e-5  
0.081, 4.870e-5  
0.080, 4.921e-5

0.079, 4.972e-5  
0.078, 5.020e-5  
0.077, 5.075e-5  
0.076, 5.131e-5  
0.075, 5.184e-5  
0.074, 5.238e-5  
0.073, 5.287e-5  
0.072, 5.342e-5  
0.071, 5.396e-5  
0.070, 5.447e-5  
0.069, 5.491e-5  
0.068, 5.529e-5  
0.067, 5.585e-5  
0.066, 5.649e-5  
0.065, 5.704e-5  
0.064, 5.749e-5  
0.063, 5.790e-5  
0.062, 5.837e-5  
0.061, 5.889e-5  
0.060, 5.944e-5  
0.059, 5.999e-5  
0.058, 6.058e-5  
0.057, 6.113e-5  
0.056, 6.151e-5  
0.055, 6.192e-5  
0.054, 6.237e-5  
0.053, 6.286e-5  
0.052, 6.334e-5  
0.051, 6.391e-5  
0.050, 6.438e-5  
0.049, 6.469e-5  
0.048, 6.500e-5  
0.047, 6.546e-5  
0.046, 6.599e-5  
0.045, 6.650e-5  
0.044, 6.698e-5  
0.043, 6.744e-5  
0.042, 6.796e-5  
0.041, 6.842e-5  
0.040, 6.883e-5  
0.039, 6.924e-5  
0.038, 6.968e-5  
0.037, 7.017e-5  
0.036, 7.056e-5  
0.035, 7.099e-5  
0.034, 7.149e-5  
0.033, 7.192e-5  
0.032, 7.227e-5  
0.031, 7.264e-5  
0.030, 7.309e-5

0.029, 7.362e-5  
0.028, 7.408e-5  
0.027, 7.442e-5  
0.026, 7.486e-5  
0.025, 7.535e-5  
0.024, 7.572e-5  
0.023, 7.611e-5  
0.022, 7.649e-5  
0.021, 7.689e-5  
0.020, 7.739e-5  
0.019, 7.782e-5  
0.018, 7.806e-5  
0.017, 7.831e-5  
0.016, 7.874e-5  
0.015, 7.924e-5  
0.014, 7.970e-5  
0.013, 8.015e-5  
0.012, 8.059e-5  
0.011, 8.098e-5  
0.010, 8.136e-5  
0.009, 8.180e-5  
0.008, 8.218e-5  
0.007, 8.250e-5  
0.006, 8.286e-5  
0.005, 8.335e-5  
0.004, 8.385e-5  
0.003, 8.424e-5  
0.002, 8.461e-5  
0.001, 8.504e-5  
0.000, 8.548e-5  
-0.001, 8.573e-5  
-0.002, 8.592e-5  
-0.003, 8.637e-5  
-0.004, 8.699e-5  
-0.005, 8.750e-5  
-0.006, 8.788e-5  
-0.007, 8.821e-5  
-0.008, 8.855e-5  
-0.009, 8.895e-5  
-0.010, 8.943e-5  
-0.011, 8.995e-5  
-0.012, 9.034e-5  
-0.013, 9.093e-5  
-0.014, 9.142e-5  
-0.015, 9.169e-5  
-0.016, 9.203e-5  
-0.017, 9.244e-5  
-0.018, 9.280e-5  
-0.019, 9.320e-5  
-0.020, 9.362e-5

-0.021, 9.399e-5  
-0.022, 9.438e-5  
-0.023, 9.476e-5  
-0.024, 9.519e-5  
-0.025, 9.550e-5  
-0.026, 9.588e-5  
-0.027, 9.635e-5  
-0.028, 9.680e-5  
-0.029, 9.735e-5  
-0.030, 9.785e-5  
-0.031, 9.819e-5  
-0.032, 9.843e-5  
-0.033, 9.892e-5  
-0.034, 9.959e-5  
-0.035, 1.001e-4  
-0.036, 1.004e-4  
-0.037, 1.006e-4  
-0.038, 1.011e-4  
-0.039, 1.017e-4  
-0.040, 1.021e-4  
-0.041, 1.026e-4  
-0.042, 1.031e-4  
-0.043, 1.033e-4  
-0.044, 1.036e-4  
-0.045, 1.042e-4  
-0.046, 1.047e-4  
-0.047, 1.053e-4  
-0.048, 1.058e-4  
-0.049, 1.062e-4  
-0.050, 1.067e-4  
-0.051, 1.071e-4  
-0.052, 1.076e-4  
-0.053, 1.081e-4  
-0.054, 1.086e-4  
-0.055, 1.091e-4  
-0.056, 1.096e-4  
-0.057, 1.101e-4  
-0.058, 1.104e-4  
-0.059, 1.106e-4  
-0.060, 1.109e-4  
-0.061, 1.116e-4  
-0.062, 1.124e-4  
-0.063, 1.131e-4  
-0.064, 1.136e-4  
-0.065, 1.141e-4  
-0.066, 1.146e-4  
-0.067, 1.150e-4  
-0.068, 1.154e-4  
-0.069, 1.157e-4  
-0.070, 1.161e-4

-0.071, 1.168e-4  
-0.072, 1.175e-4  
-0.073, 1.181e-4  
-0.074, 1.186e-4  
-0.075, 1.191e-4  
-0.076, 1.196e-4  
-0.077, 1.200e-4  
-0.078, 1.204e-4  
-0.079, 1.207e-4  
-0.080, 1.212e-4  
-0.081, 1.219e-4  
-0.082, 1.227e-4  
-0.083, 1.232e-4  
-0.084, 1.236e-4  
-0.085, 1.241e-4  
-0.086, 1.246e-4  
-0.087, 1.251e-4  
-0.088, 1.256e-4  
-0.089, 1.260e-4  
-0.090, 1.264e-4  
-0.091, 1.272e-4  
-0.092, 1.278e-4  
-0.093, 1.283e-4  
-0.094, 1.289e-4  
-0.095, 1.294e-4  
-0.096, 1.299e-4  
-0.097, 1.305e-4  
-0.098, 1.311e-4  
-0.099, 1.318e-4  
-0.100, 1.323e-4  
-0.101, 1.329e-4  
-0.102, 1.332e-4  
-0.103, 1.336e-4  
-0.104, 1.342e-4  
-0.105, 1.349e-4  
-0.106, 1.356e-4  
-0.107, 1.360e-4  
-0.108, 1.365e-4  
-0.109, 1.370e-4  
-0.110, 1.375e-4  
-0.111, 1.379e-4  
-0.112, 1.386e-4  
-0.113, 1.393e-4  
-0.114, 1.399e-4  
-0.115, 1.406e-4  
-0.116, 1.414e-4  
-0.117, 1.420e-4  
-0.118, 1.426e-4  
-0.119, 1.432e-4  
-0.120, 1.437e-4



-0.121, 1.443e-4  
-0.122, 1.449e-4  
-0.123, 1.450e-4  
-0.124, 1.455e-4  
-0.125, 1.463e-4  
-0.126, 1.472e-4  
-0.127, 1.479e-4  
-0.128, 1.484e-4  
-0.129, 1.488e-4  
-0.130, 1.489e-4  
-0.131, 1.494e-4  
-0.132, 1.502e-4  
-0.133, 1.512e-4  
-0.134, 1.523e-4  
-0.135, 1.532e-4  
-0.136, 1.538e-4  
-0.137, 1.543e-4  
-0.138, 1.547e-4  
-0.139, 1.550e-4  
-0.140, 1.554e-4  
-0.141, 1.561e-4  
-0.142, 1.568e-4  
-0.143, 1.576e-4  
-0.144, 1.582e-4  
-0.145, 1.590e-4  
-0.146, 1.596e-4  
-0.147, 1.602e-4  
-0.148, 1.609e-4  
-0.149, 1.614e-4  
-0.150, 1.619e-4  
-0.151, 1.626e-4  
-0.152, 1.633e-4  
-0.153, 1.640e-4  
-0.154, 1.648e-4  
-0.155, 1.654e-4  
-0.156, 1.660e-4  
-0.157, 1.665e-4  
-0.158, 1.672e-4  
-0.159, 1.679e-4  
-0.160, 1.687e-4  
-0.161, 1.695e-4  
-0.162, 1.700e-4  
-0.163, 1.706e-4  
-0.164, 1.711e-4  
-0.165, 1.715e-4  
-0.166, 1.721e-4  
-0.167, 1.732e-4  
-0.168, 1.742e-4  
-0.169, 1.749e-4  
-0.170, 1.753e-4

-0.171, 1.760e-4  
-0.172, 1.768e-4  
-0.173, 1.777e-4  
-0.174, 1.784e-4  
-0.175, 1.790e-4  
-0.176, 1.795e-4  
-0.177, 1.802e-4  
-0.178, 1.808e-4  
-0.179, 1.811e-4  
-0.180, 1.813e-4  
-0.181, 1.816e-4  
-0.182, 1.827e-4  
-0.183, 1.836e-4  
-0.184, 1.848e-4  
-0.185, 1.857e-4  
-0.186, 1.865e-4  
-0.187, 1.873e-4  
-0.188, 1.881e-4  
-0.189, 1.887e-4  
-0.190, 1.893e-4  
-0.191, 1.899e-4  
-0.192, 1.905e-4  
-0.193, 1.911e-4  
-0.194, 1.920e-4  
-0.195, 1.928e-4  
-0.196, 1.935e-4  
-0.197, 1.942e-4  
-0.198, 1.943e-4  
-0.199, 1.948e-4  
-0.200, 1.958e-4  
-0.201, 1.968e-4  
-0.202, 1.977e-4  
-0.203, 1.986e-4  
-0.204, 1.994e-4  
-0.205, 2.001e-4  
-0.206, 2.008e-4  
-0.207, 2.016e-4  
-0.208, 2.023e-4  
-0.209, 2.027e-4  
-0.210, 2.028e-4  
-0.211, 2.036e-4  
-0.212, 2.049e-4  
-0.213, 2.059e-4  
-0.214, 2.066e-4  
-0.215, 2.071e-4  
-0.216, 2.076e-4  
-0.217, 2.083e-4  
-0.218, 2.095e-4  
-0.219, 2.106e-4  
-0.220, 2.117e-4

-0.221, 2.126e-4  
-0.222, 2.131e-4  
-0.223, 2.136e-4  
-0.224, 2.142e-4  
-0.225, 2.151e-4  
-0.226, 2.163e-4  
-0.227, 2.173e-4  
-0.228, 2.176e-4  
-0.229, 2.171e-4  
-0.230, 2.176e-4  
-0.231, 2.190e-4  
-0.232, 2.202e-4  
-0.233, 2.213e-4  
-0.234, 2.224e-4  
-0.235, 2.234e-4  
-0.236, 2.239e-4  
-0.237, 2.245e-4  
-0.238, 2.254e-4  
-0.239, 2.262e-4  
-0.240, 2.273e-4  
-0.241, 2.275e-4  
-0.242, 2.275e-4  
-0.243, 2.283e-4  
-0.244, 2.293e-4  
-0.245, 2.303e-4  
-0.246, 2.313e-4  
-0.247, 2.323e-4  
-0.248, 2.336e-4  
-0.249, 2.345e-4  
-0.250, 2.353e-4  
-0.251, 2.360e-4  
-0.252, 2.365e-4  
-0.253, 2.372e-4  
-0.254, 2.379e-4  
-0.255, 2.385e-4  
-0.256, 2.394e-4  
-0.257, 2.407e-4  
-0.258, 2.417e-4  
-0.259, 2.425e-4  
-0.260, 2.432e-4  
-0.261, 2.440e-4  
-0.262, 2.450e-4  
-0.263, 2.457e-4  
-0.264, 2.464e-4  
-0.265, 2.469e-4  
-0.266, 2.471e-4  
-0.267, 2.481e-4  
-0.268, 2.495e-4  
-0.269, 2.506e-4  
-0.270, 2.512e-4

-0.271, 2.514e-4  
-0.272, 2.518e-4  
-0.273, 2.528e-4  
-0.274, 2.543e-4  
-0.275, 2.554e-4  
-0.276, 2.564e-4  
-0.277, 2.568e-4  
-0.278, 2.575e-4  
-0.279, 2.585e-4  
-0.280, 2.594e-4  
-0.281, 2.602e-4  
-0.282, 2.609e-4  
-0.283, 2.619e-4  
-0.284, 2.630e-4  
-0.285, 2.634e-4  
-0.286, 2.643e-4  
-0.287, 2.653e-4  
-0.288, 2.657e-4  
-0.289, 2.656e-4  
-0.290, 2.659e-4  
-0.291, 2.668e-4  
-0.292, 2.673e-4  
-0.293, 2.680e-4  
-0.294, 2.690e-4  
-0.295, 2.700e-4  
-0.296, 2.709e-4  
-0.297, 2.719e-4  
-0.298, 2.726e-4  
-0.299, 2.731e-4  
-0.300, 2.736e-4  
-0.301, 2.743e-4  
-0.302, 2.748e-4  
-0.303, 2.755e-4  
-0.304, 2.763e-4  
-0.305, 2.767e-4  
-0.306, 2.773e-4  
-0.307, 2.780e-4  
-0.308, 2.787e-4  
-0.309, 2.792e-4  
-0.310, 2.795e-4  
-0.311, 2.795e-4  
-0.312, 2.801e-4  
-0.313, 2.808e-4  
-0.314, 2.820e-4  
-0.315, 2.824e-4  
-0.316, 2.833e-4  
-0.317, 2.845e-4  
-0.318, 2.853e-4  
-0.319, 2.855e-4  
-0.320, 2.858e-4

-0.321, 2.855e-4  
-0.322, 2.853e-4  
-0.323, 2.867e-4  
-0.324, 2.876e-4  
-0.325, 2.883e-4  
-0.326, 2.888e-4  
-0.327, 2.892e-4  
-0.328, 2.899e-4  
-0.329, 2.906e-4  
-0.330, 2.910e-4  
-0.331, 2.913e-4  
-0.332, 2.916e-4  
-0.333, 2.921e-4  
-0.334, 2.921e-4  
-0.335, 2.919e-4  
-0.336, 2.927e-4  
-0.337, 2.939e-4  
-0.338, 2.946e-4  
-0.339, 2.947e-4  
-0.340, 2.950e-4  
-0.341, 2.959e-4  
-0.342, 2.964e-4  
-0.343, 2.961e-4  
-0.344, 2.965e-4  
-0.345, 2.973e-4  
-0.346, 2.979e-4  
-0.347, 2.981e-4  
-0.348, 2.993e-4  
-0.349, 3.003e-4  
-0.350, 3.009e-4  
-0.351, 3.011e-4  
-0.352, 3.012e-4  
-0.353, 3.012e-4  
-0.354, 3.015e-4  
-0.355, 3.022e-4  
-0.356, 3.027e-4  
-0.357, 3.033e-4  
-0.358, 3.041e-4  
-0.359, 3.039e-4  
-0.360, 3.041e-4  
-0.361, 3.043e-4  
-0.362, 3.046e-4  
-0.363, 3.051e-4  
-0.364, 3.062e-4  
-0.365, 3.071e-4  
-0.366, 3.073e-4  
-0.367, 3.078e-4  
-0.368, 3.081e-4  
-0.369, 3.084e-4  
-0.370, 3.086e-4

-0.371, 3.083e-4  
-0.372, 3.084e-4  
-0.373, 3.089e-4  
-0.374, 3.092e-4  
-0.375, 3.096e-4  
-0.376, 3.102e-4  
-0.377, 3.107e-4  
-0.378, 3.113e-4  
-0.379, 3.115e-4  
-0.380, 3.116e-4  
-0.381, 3.121e-4  
-0.382, 3.121e-4  
-0.383, 3.122e-4  
-0.384, 3.125e-4  
-0.385, 3.128e-4  
-0.386, 3.123e-4  
-0.387, 3.115e-4  
-0.388, 3.126e-4  
-0.389, 3.141e-4  
-0.390, 3.147e-4  
-0.391, 3.155e-4  
-0.392, 3.161e-4  
-0.393, 3.162e-4  
-0.394, 3.167e-4  
-0.395, 3.170e-4  
-0.396, 3.167e-4  
-0.397, 3.171e-4  
-0.398, 3.169e-4  
-0.399, 3.172e-4
